# Supplementary material for: Discovery of coding regions in the human genome by integrated proteogenomics analysis workflow
Source: PubMed Central journal article supplement (PMC5834625; doi:10.1038/s41467-018-03311-y), 2018-03-02

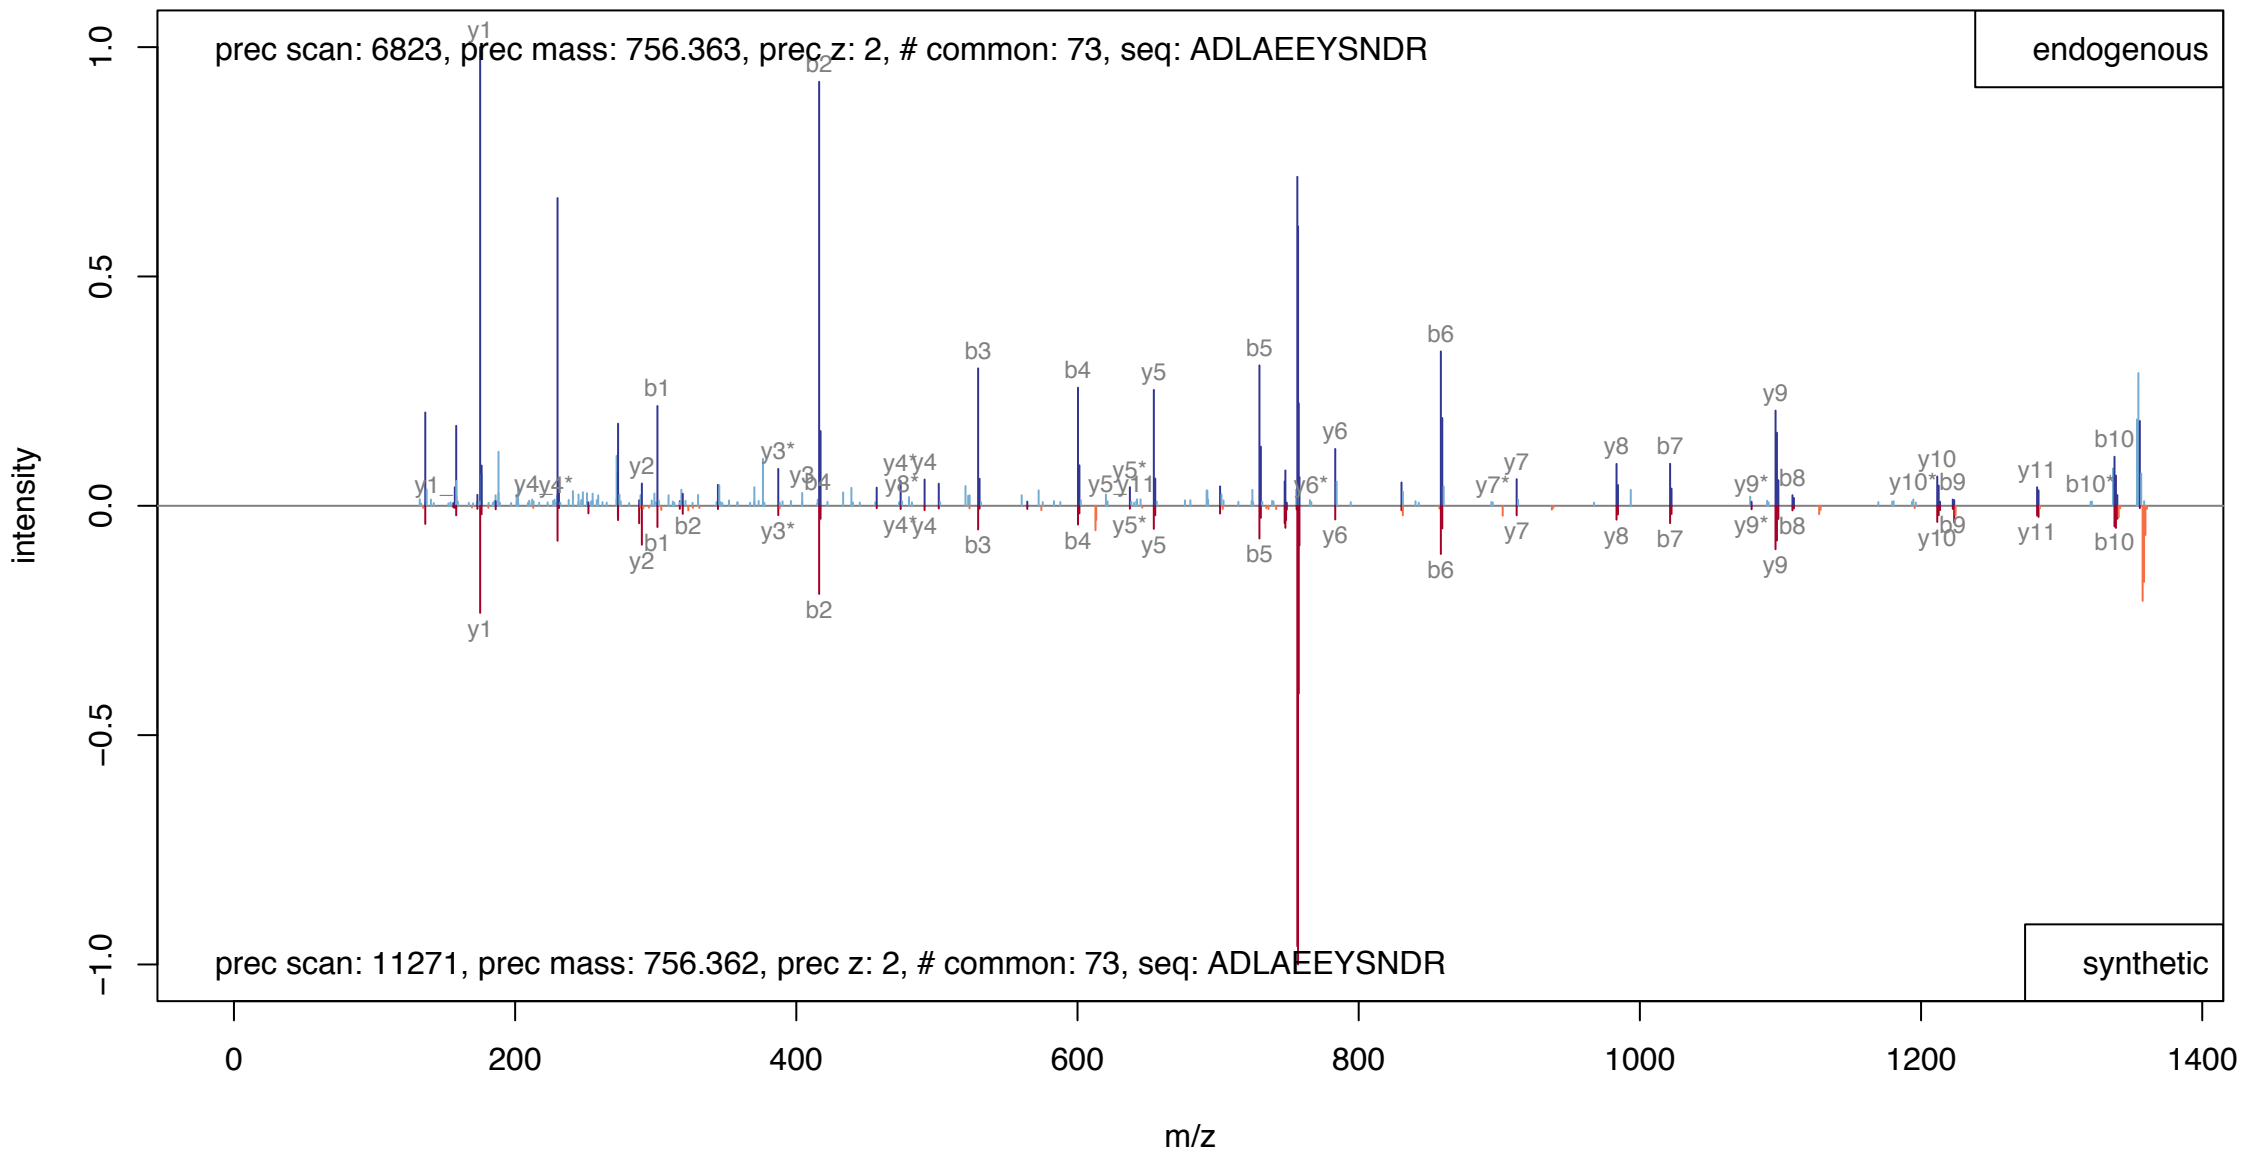

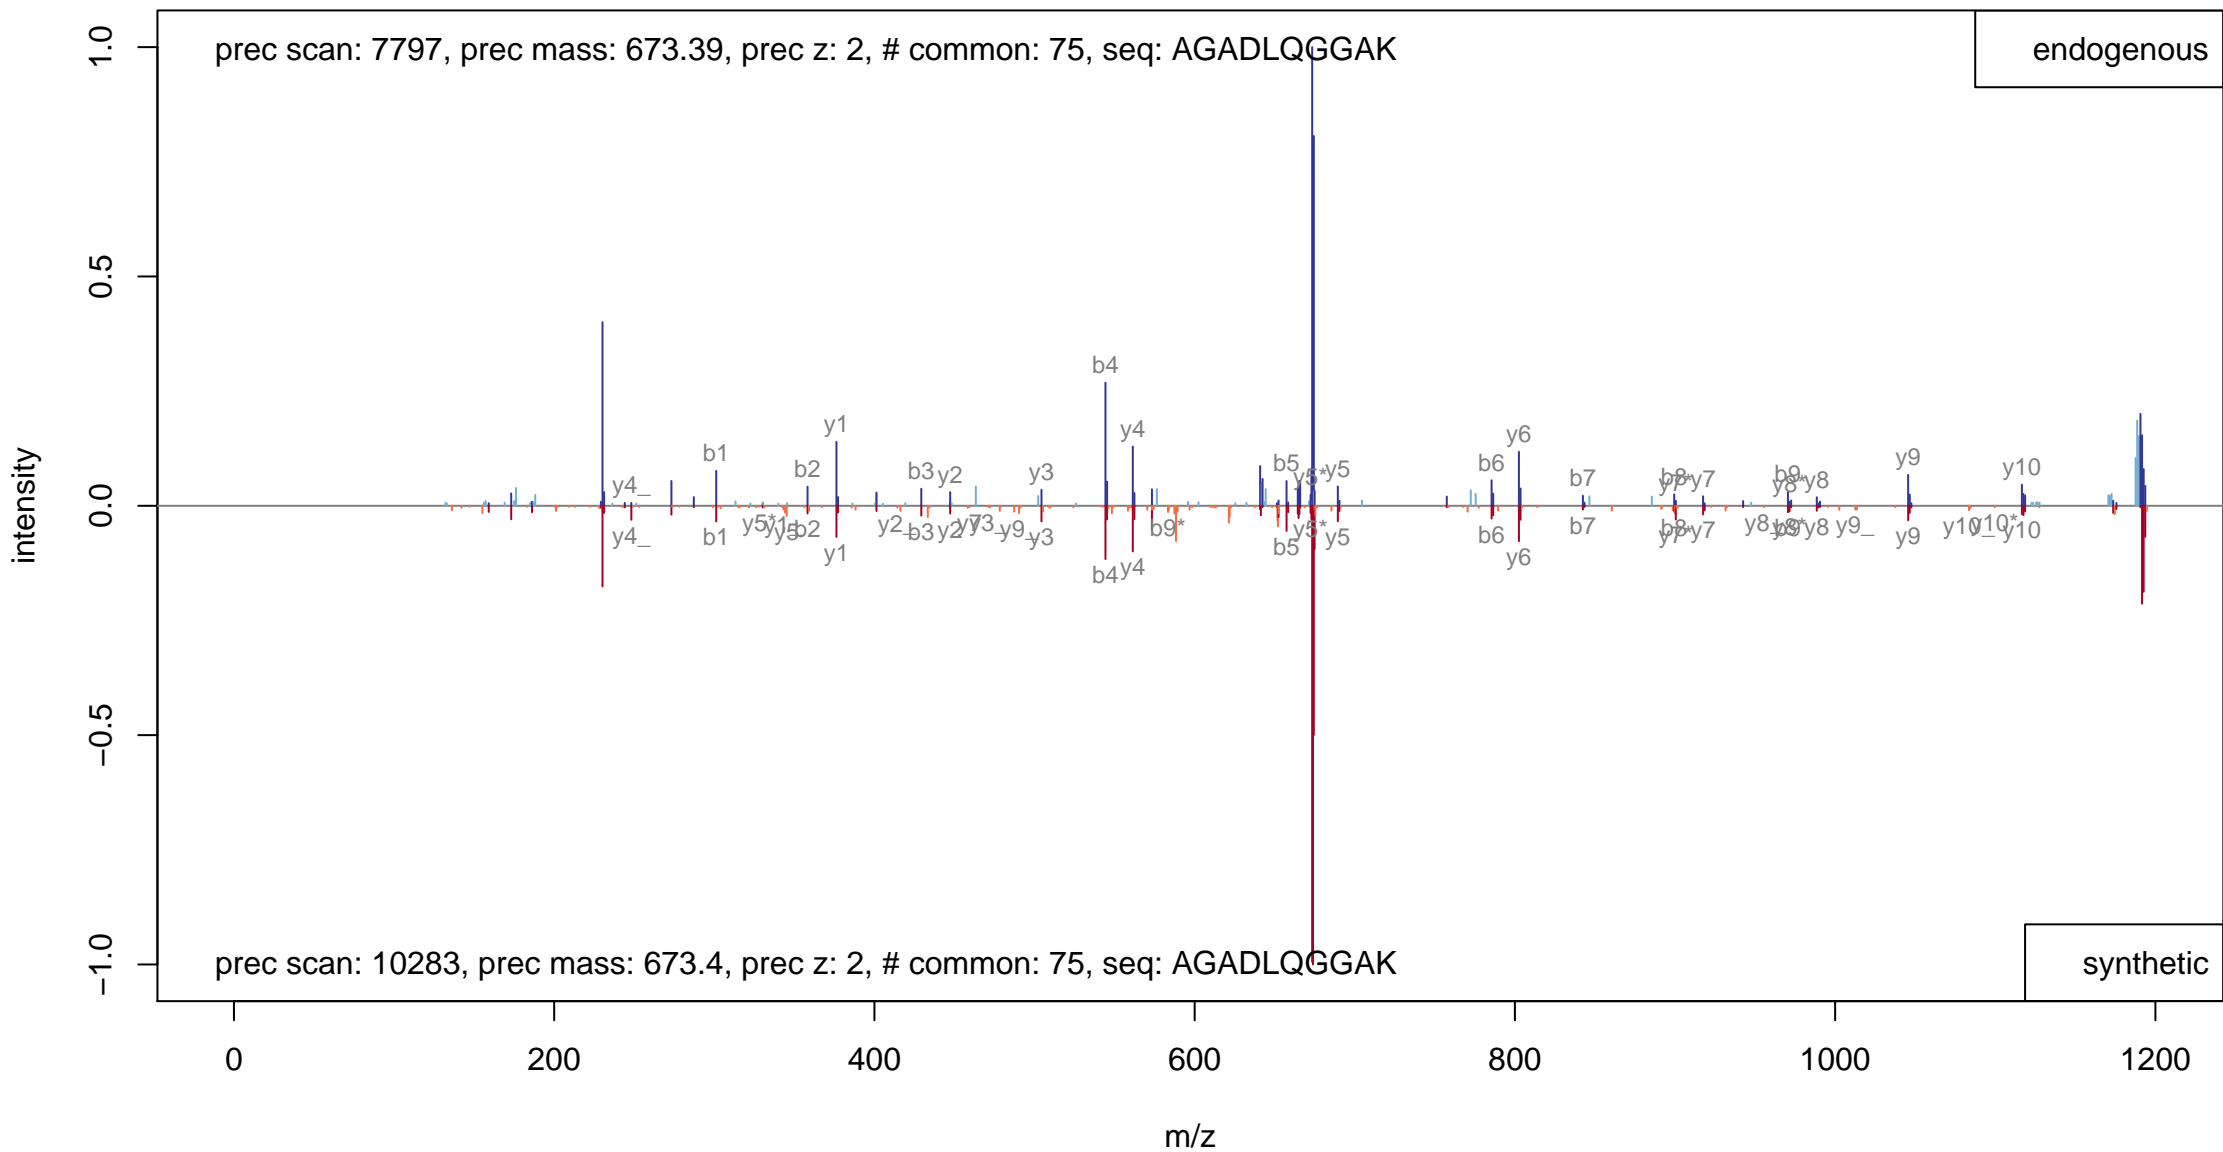

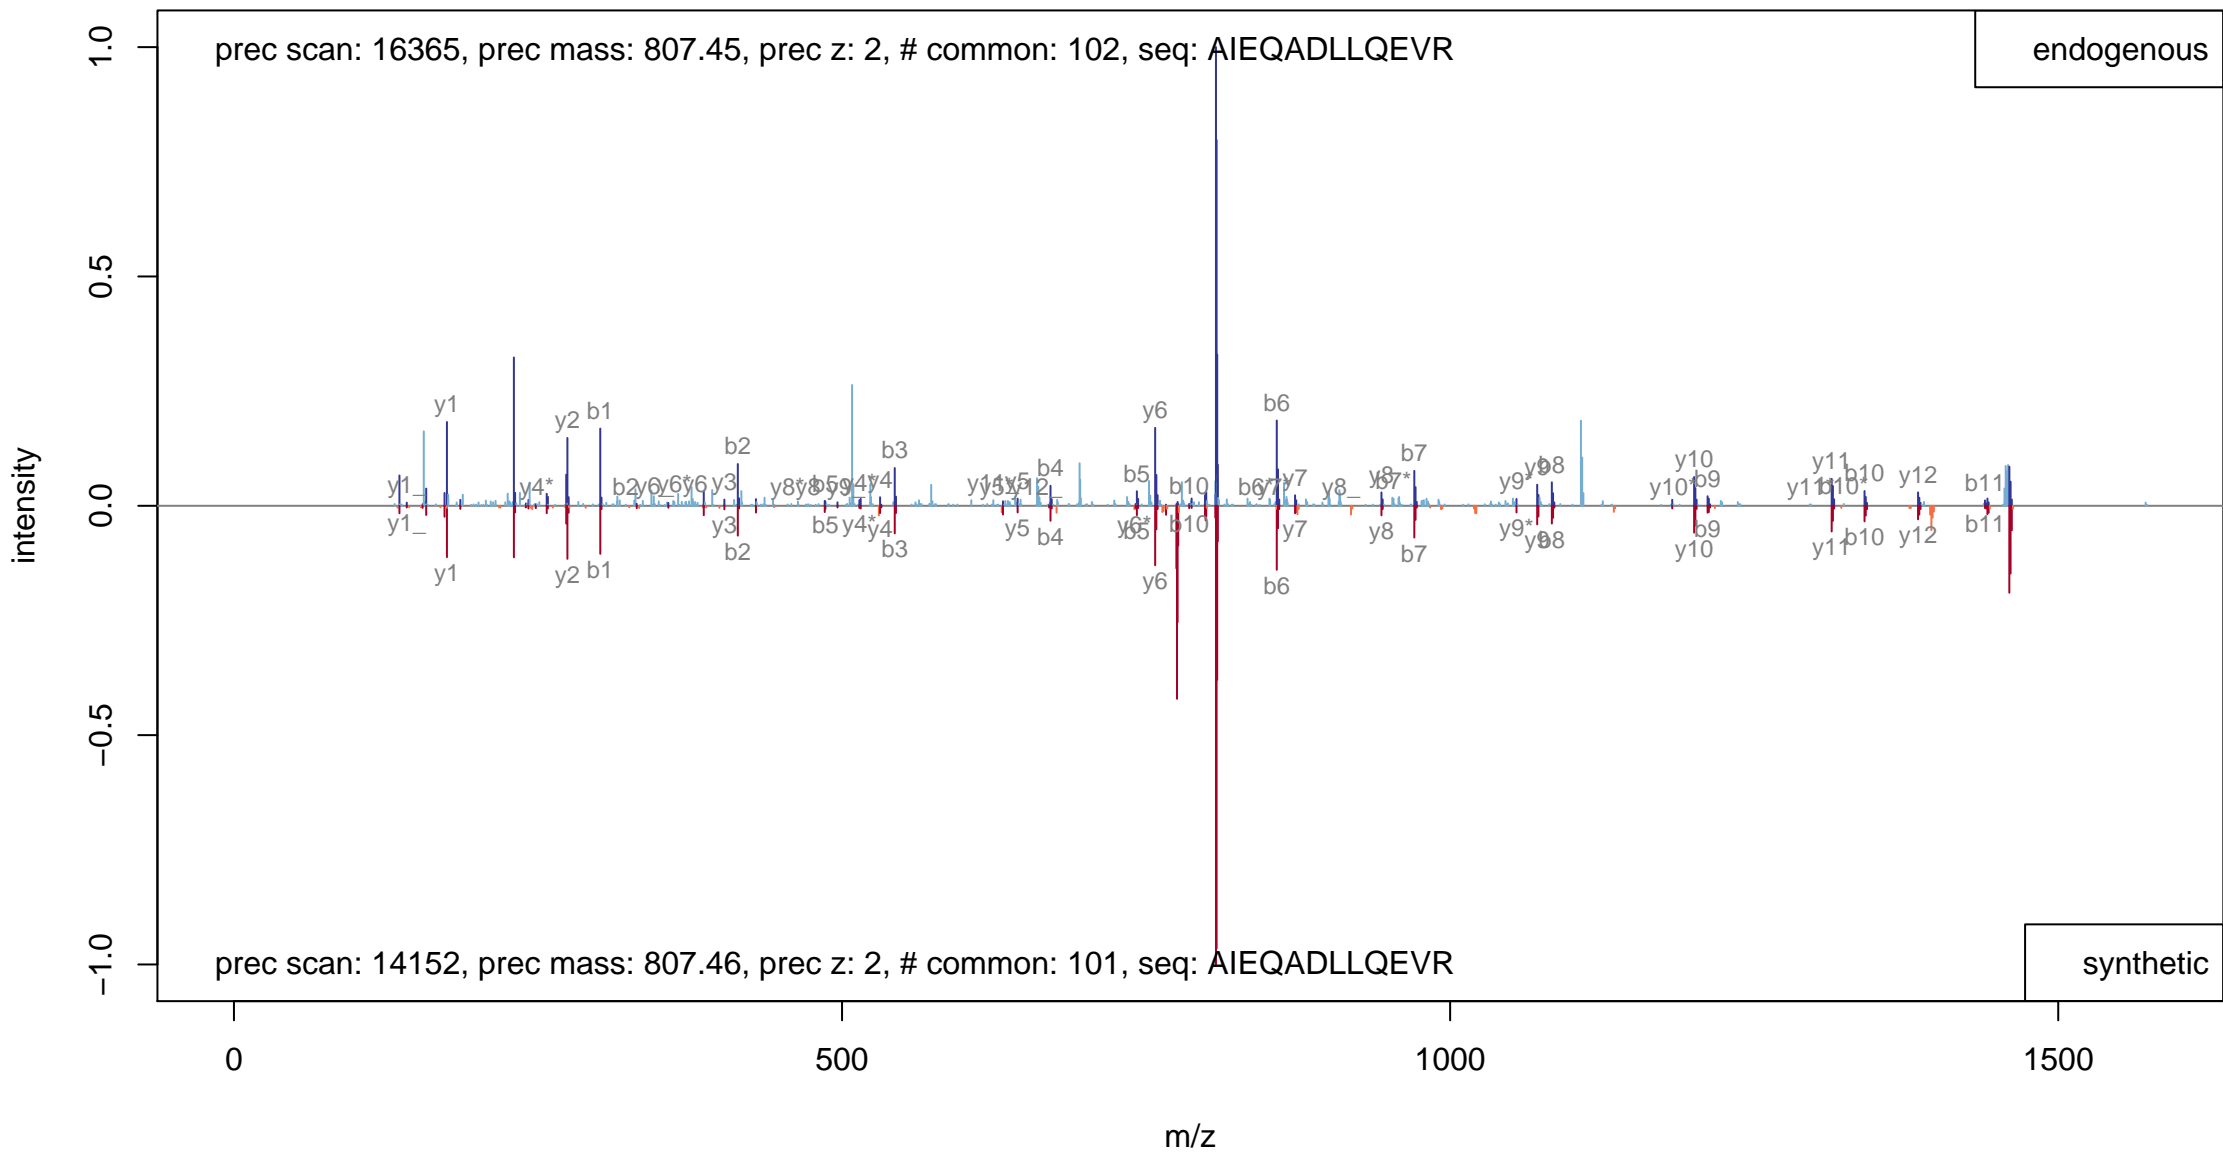

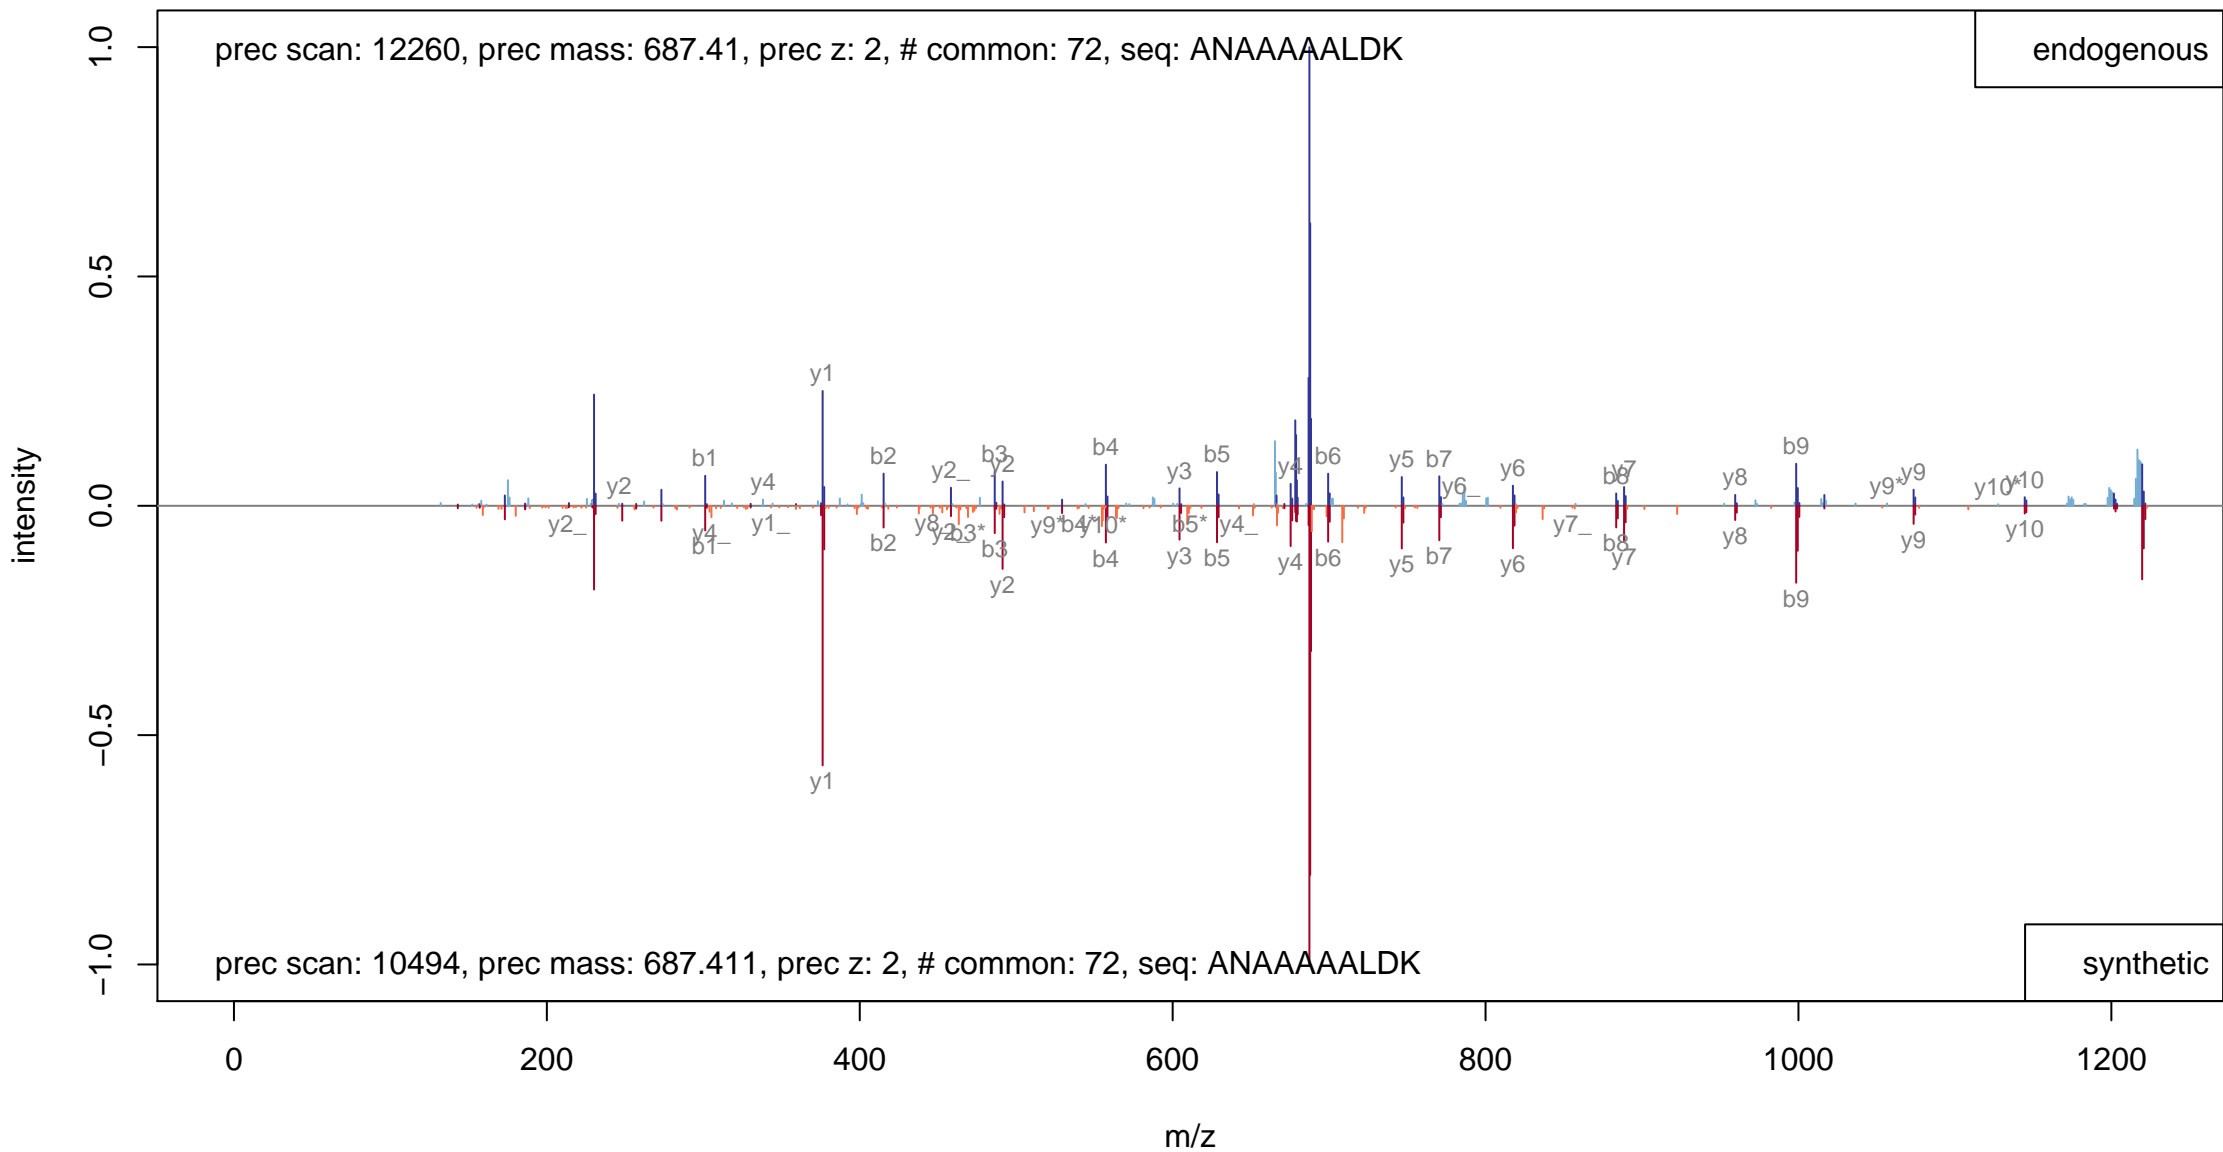

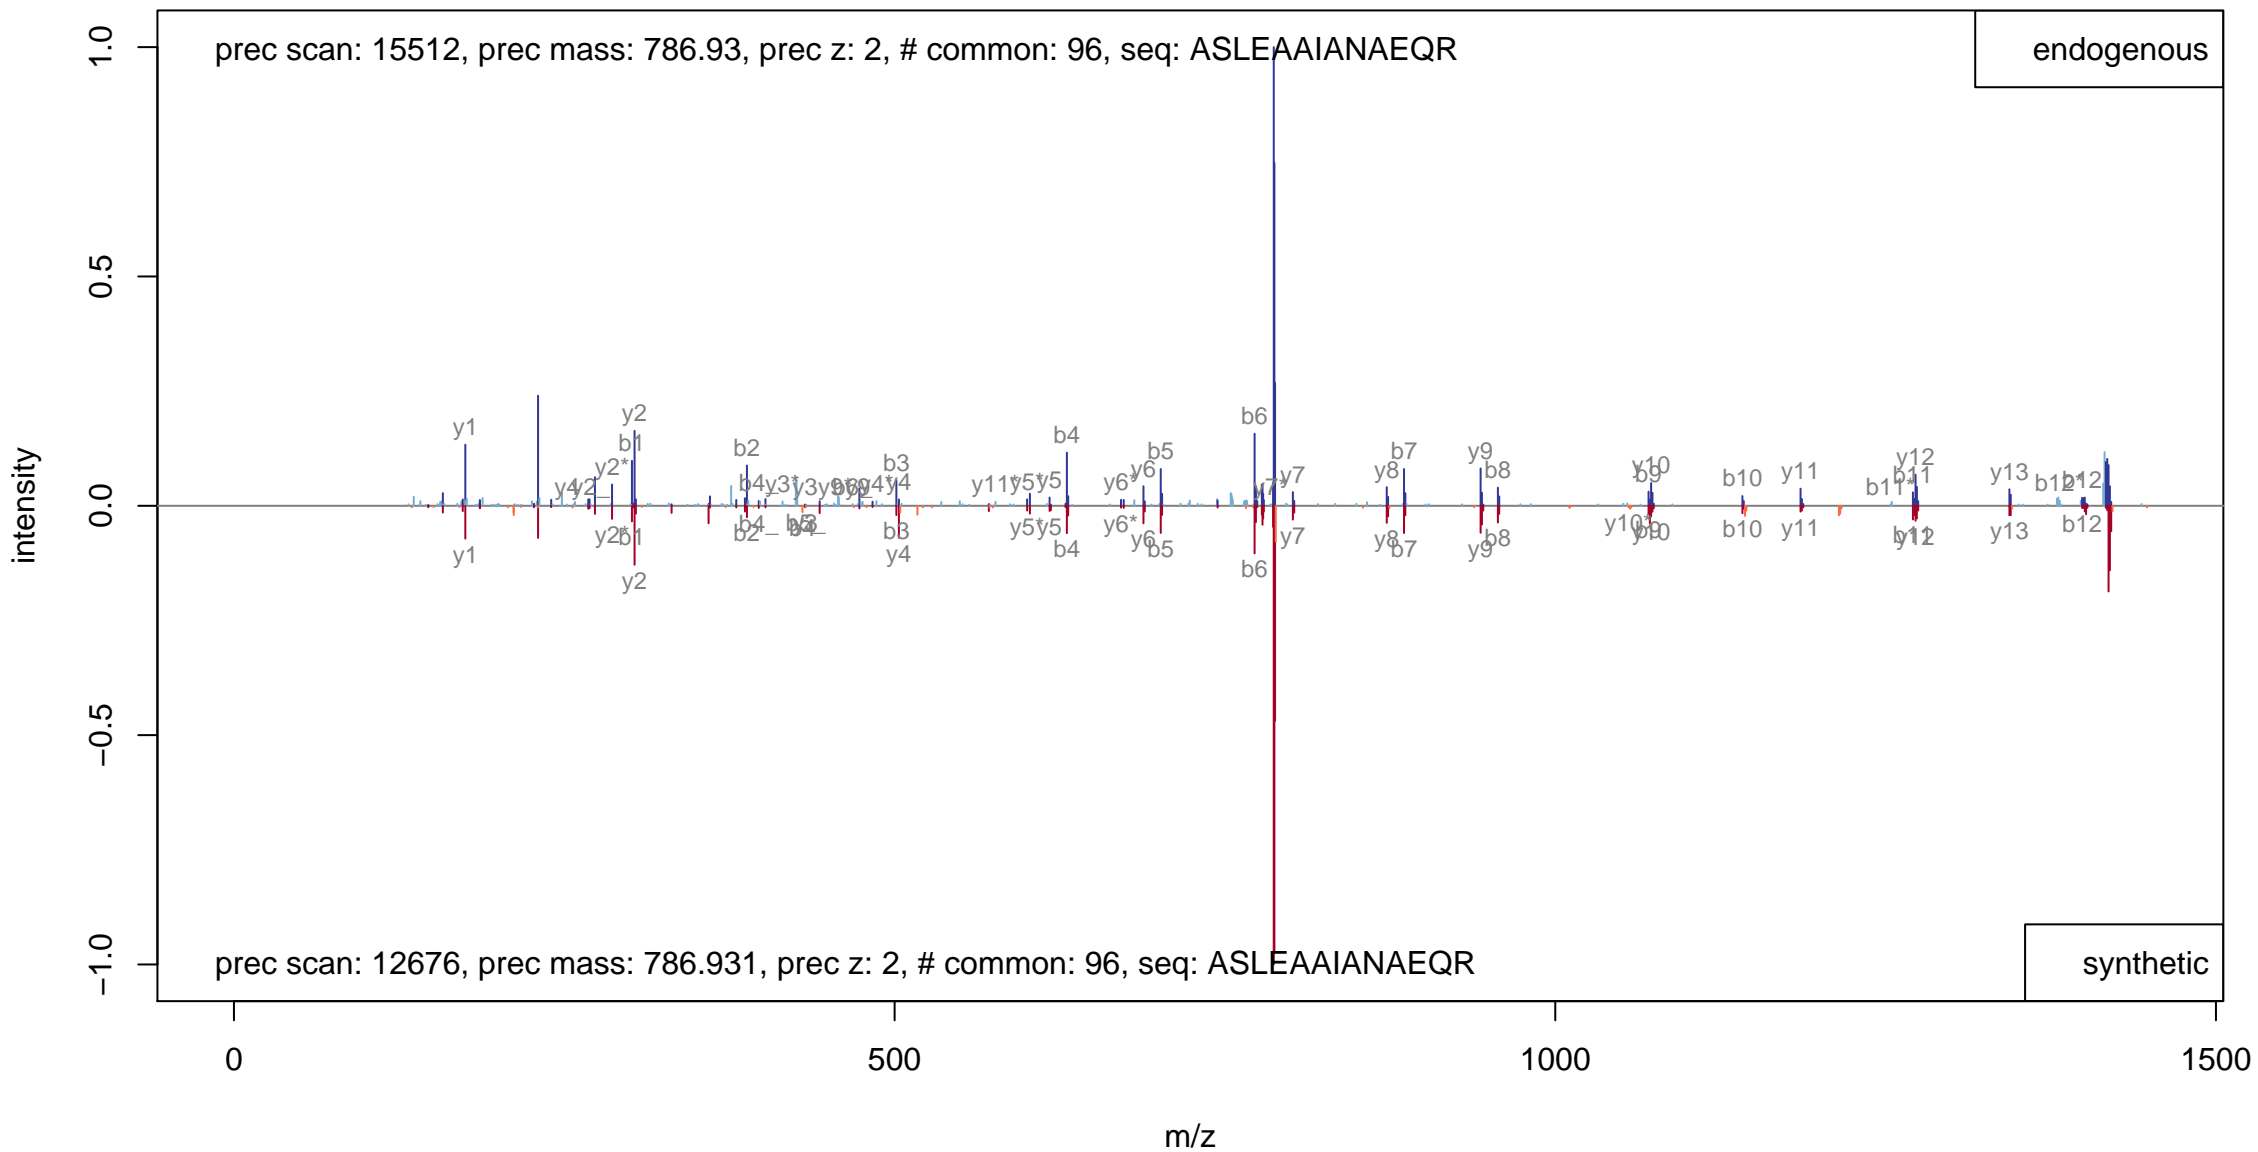

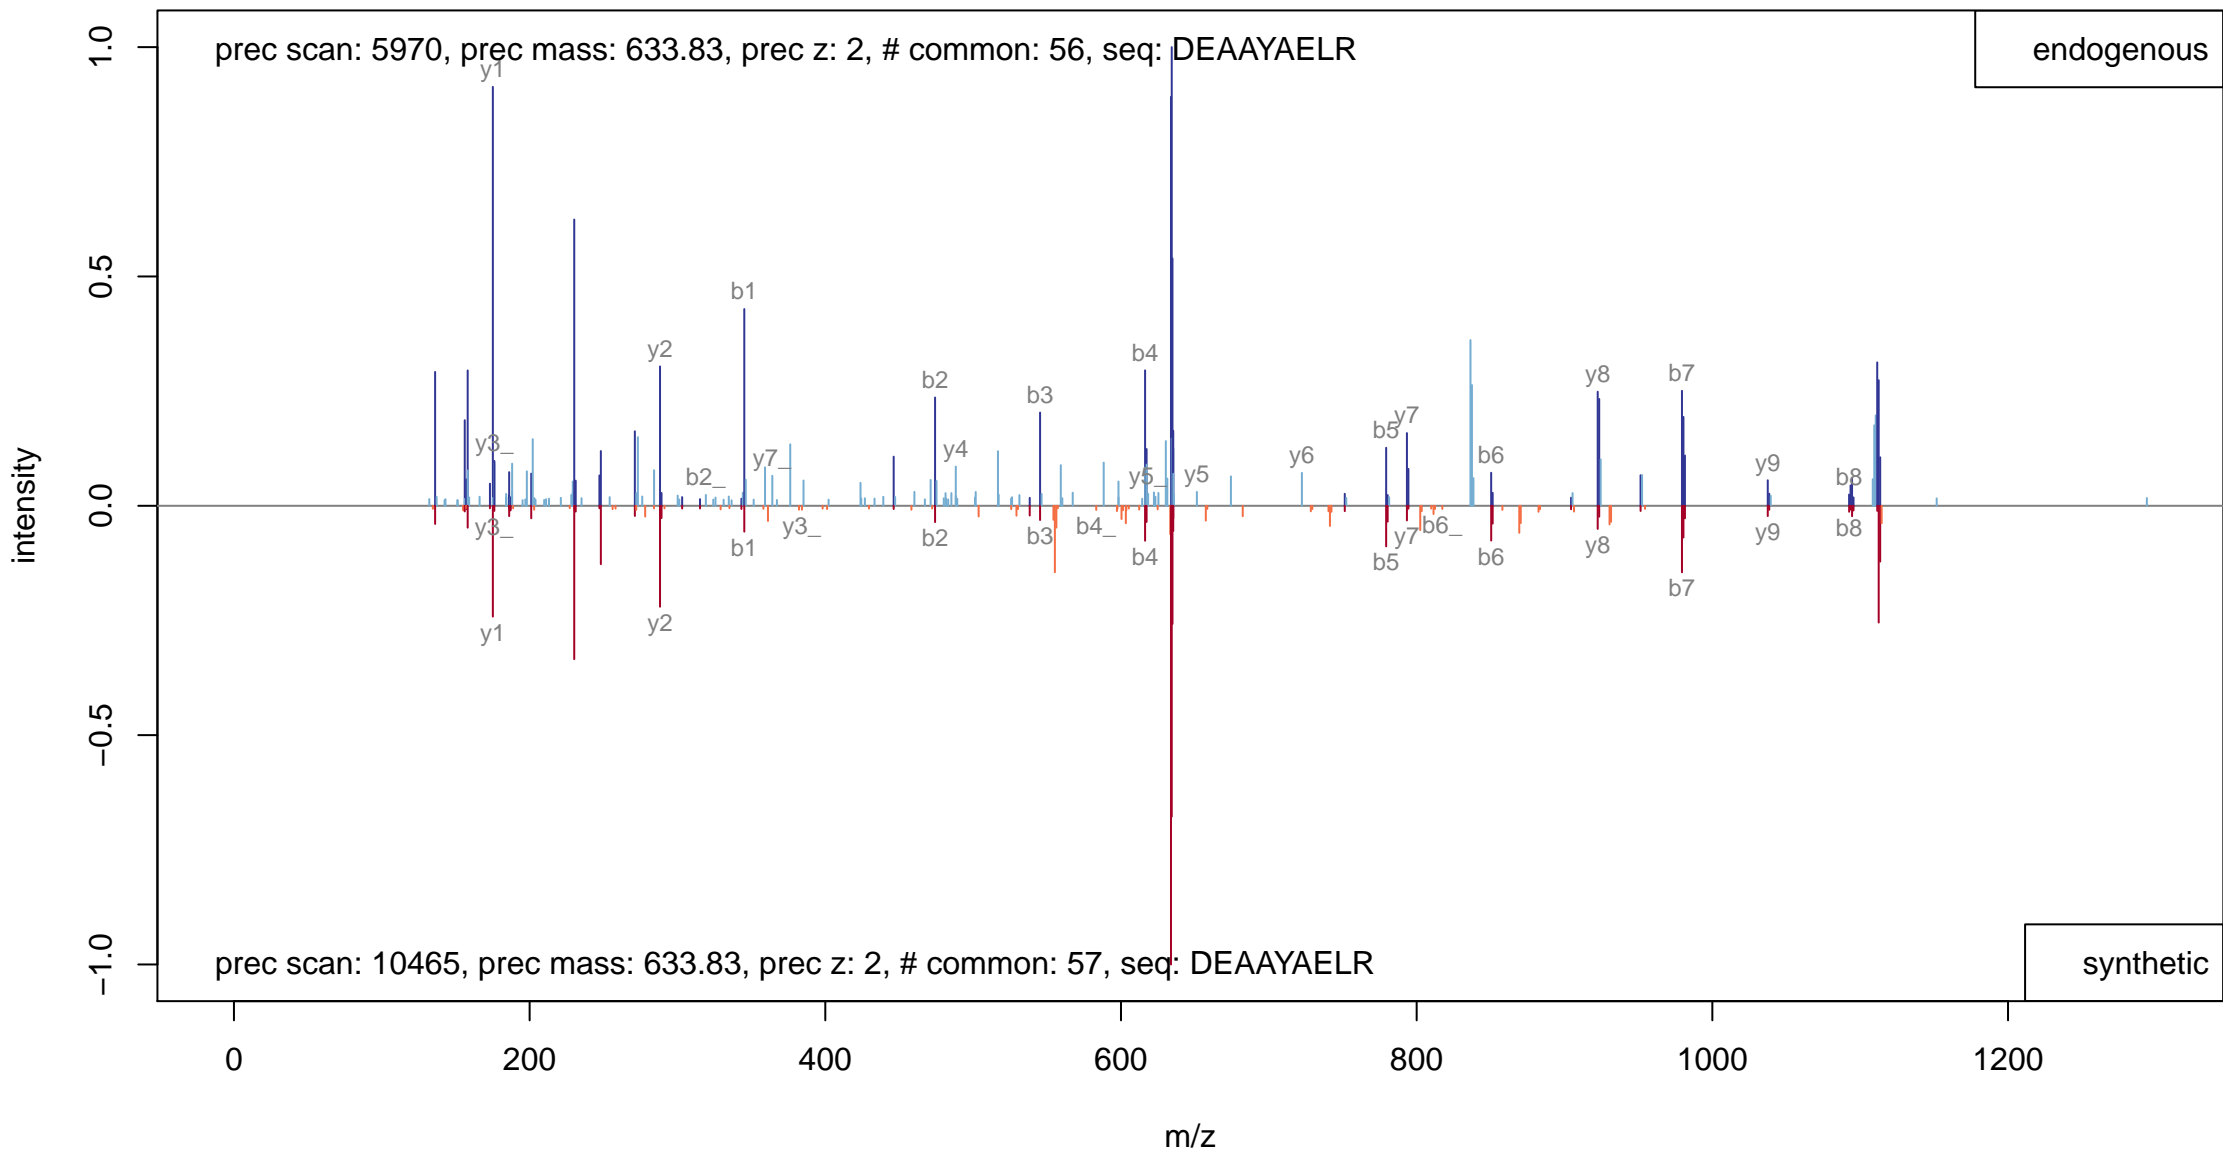

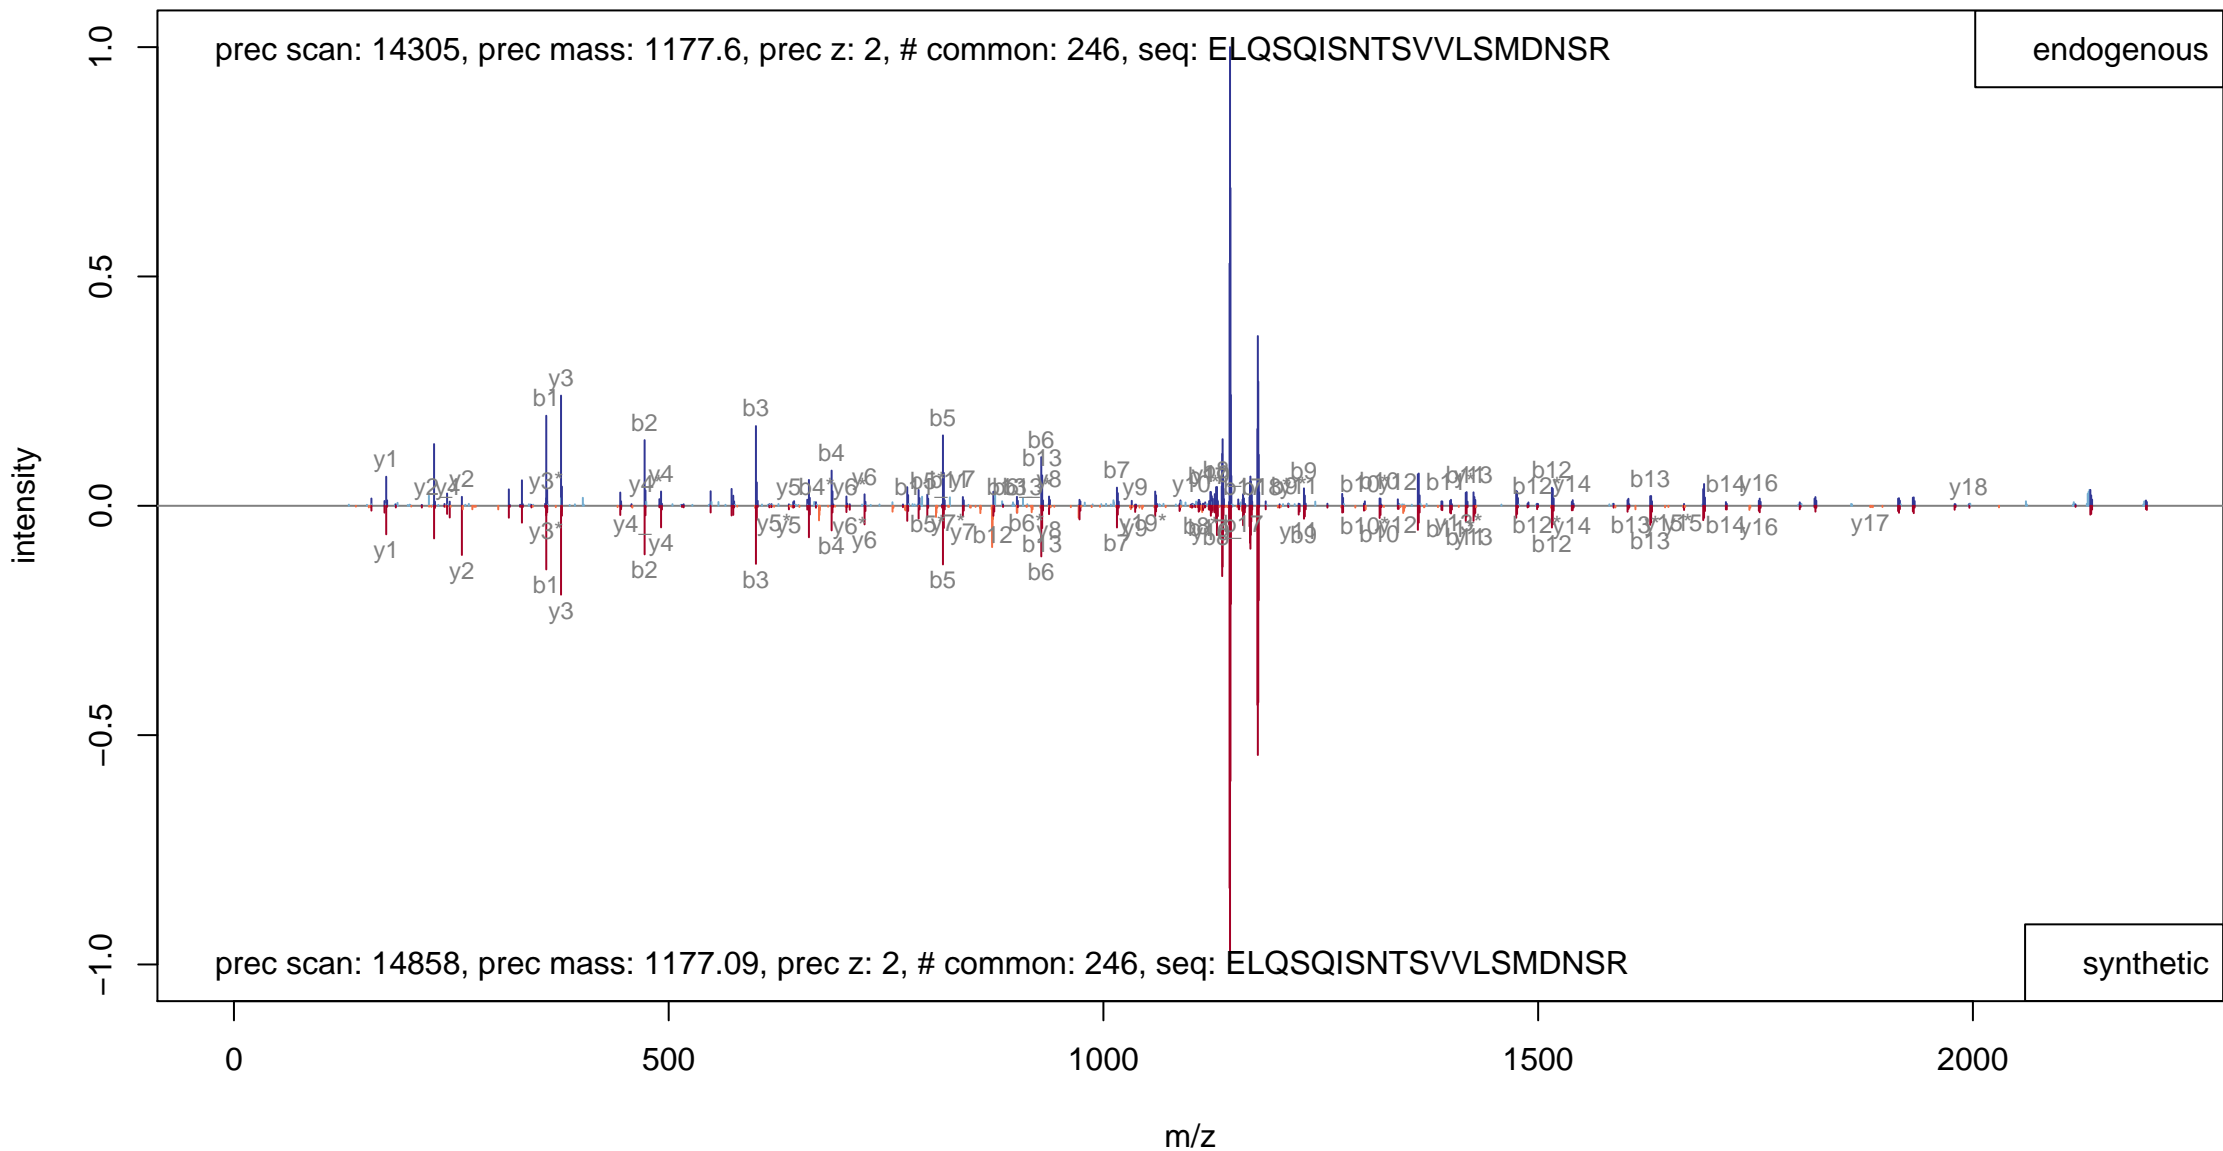

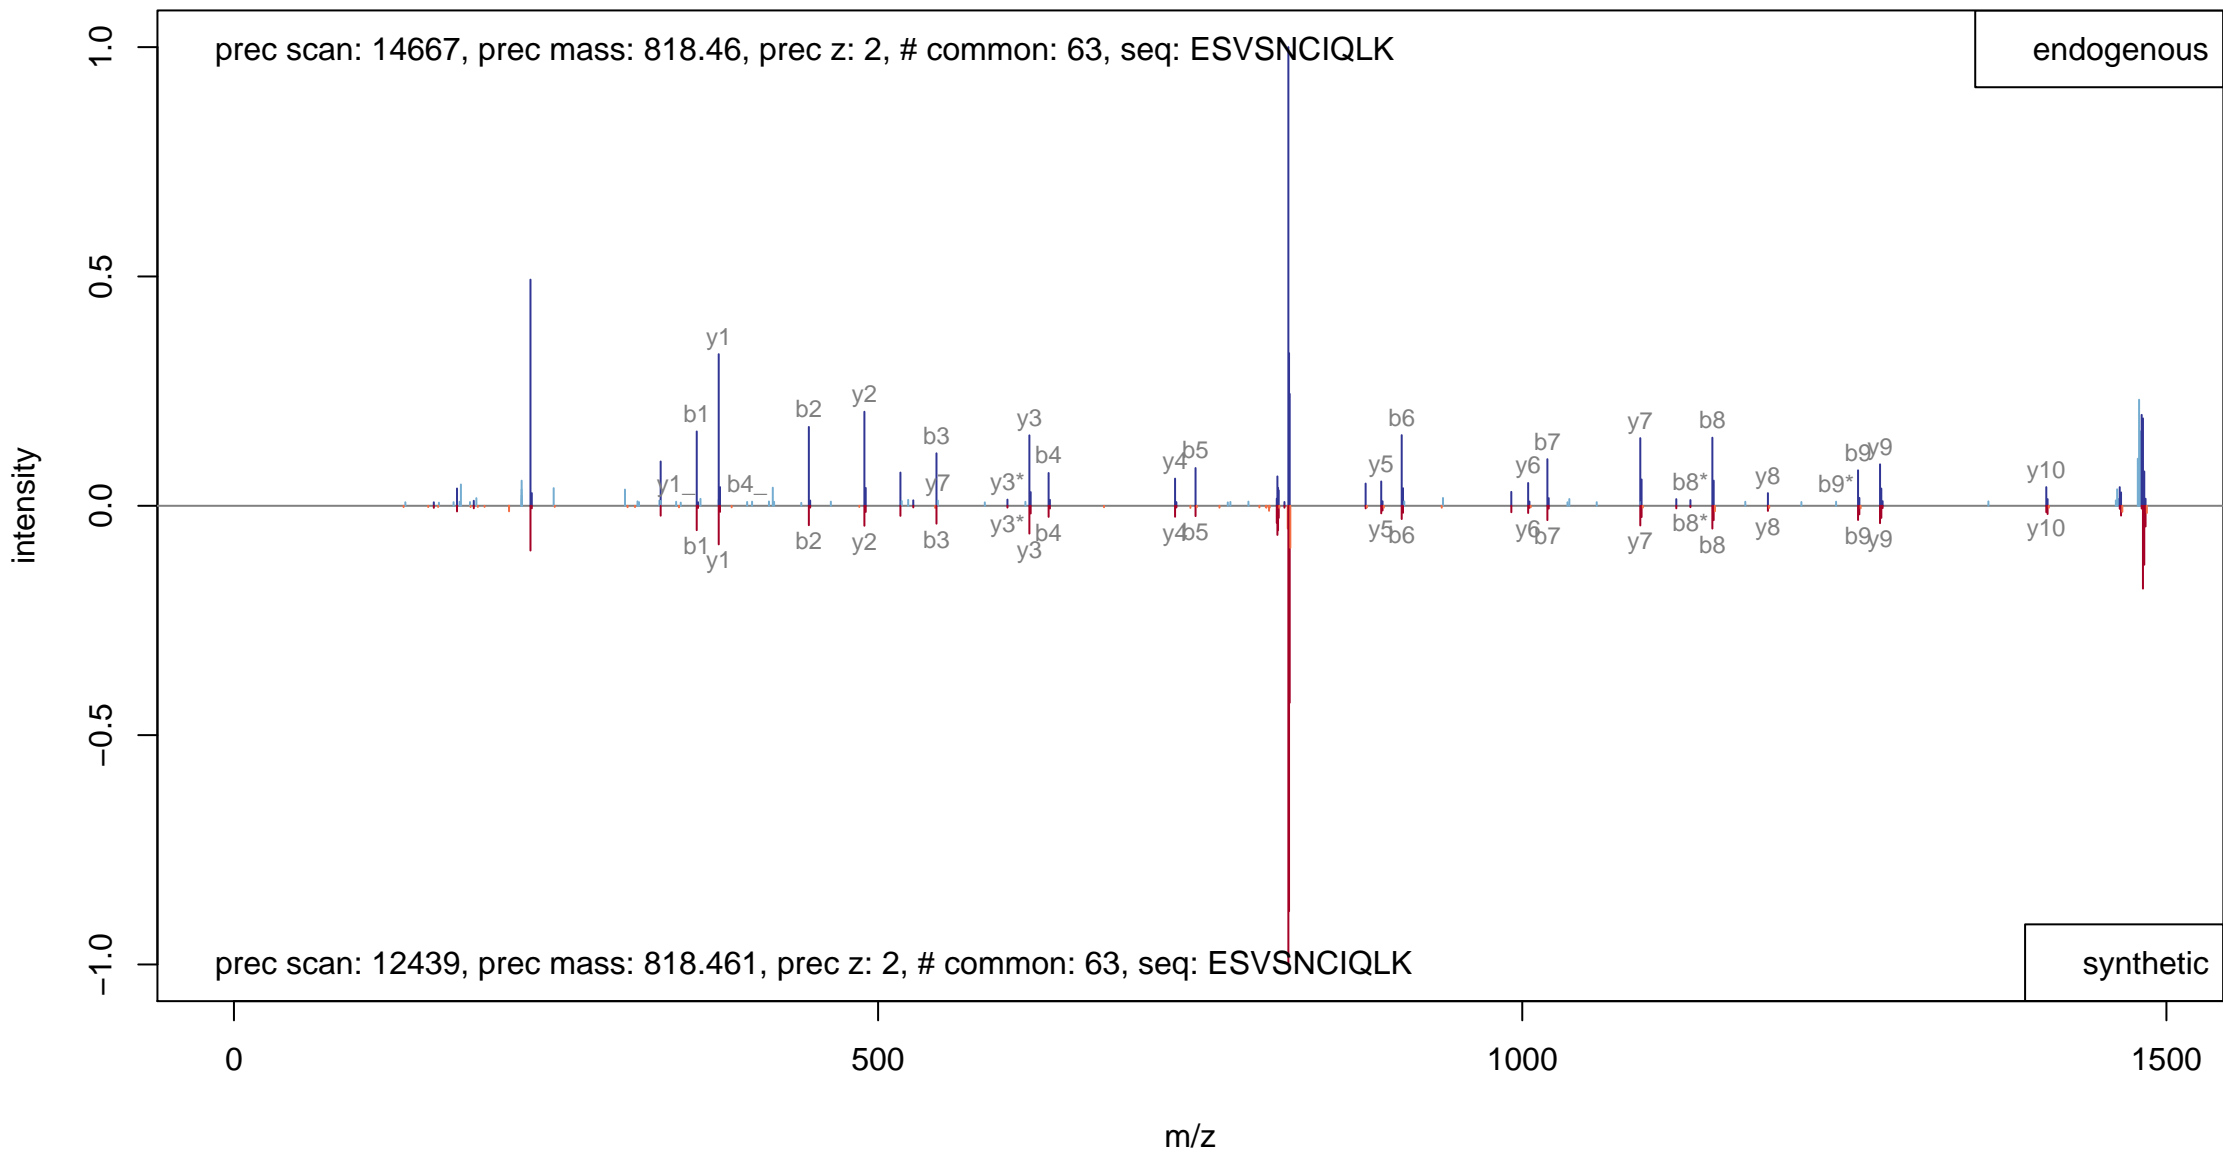



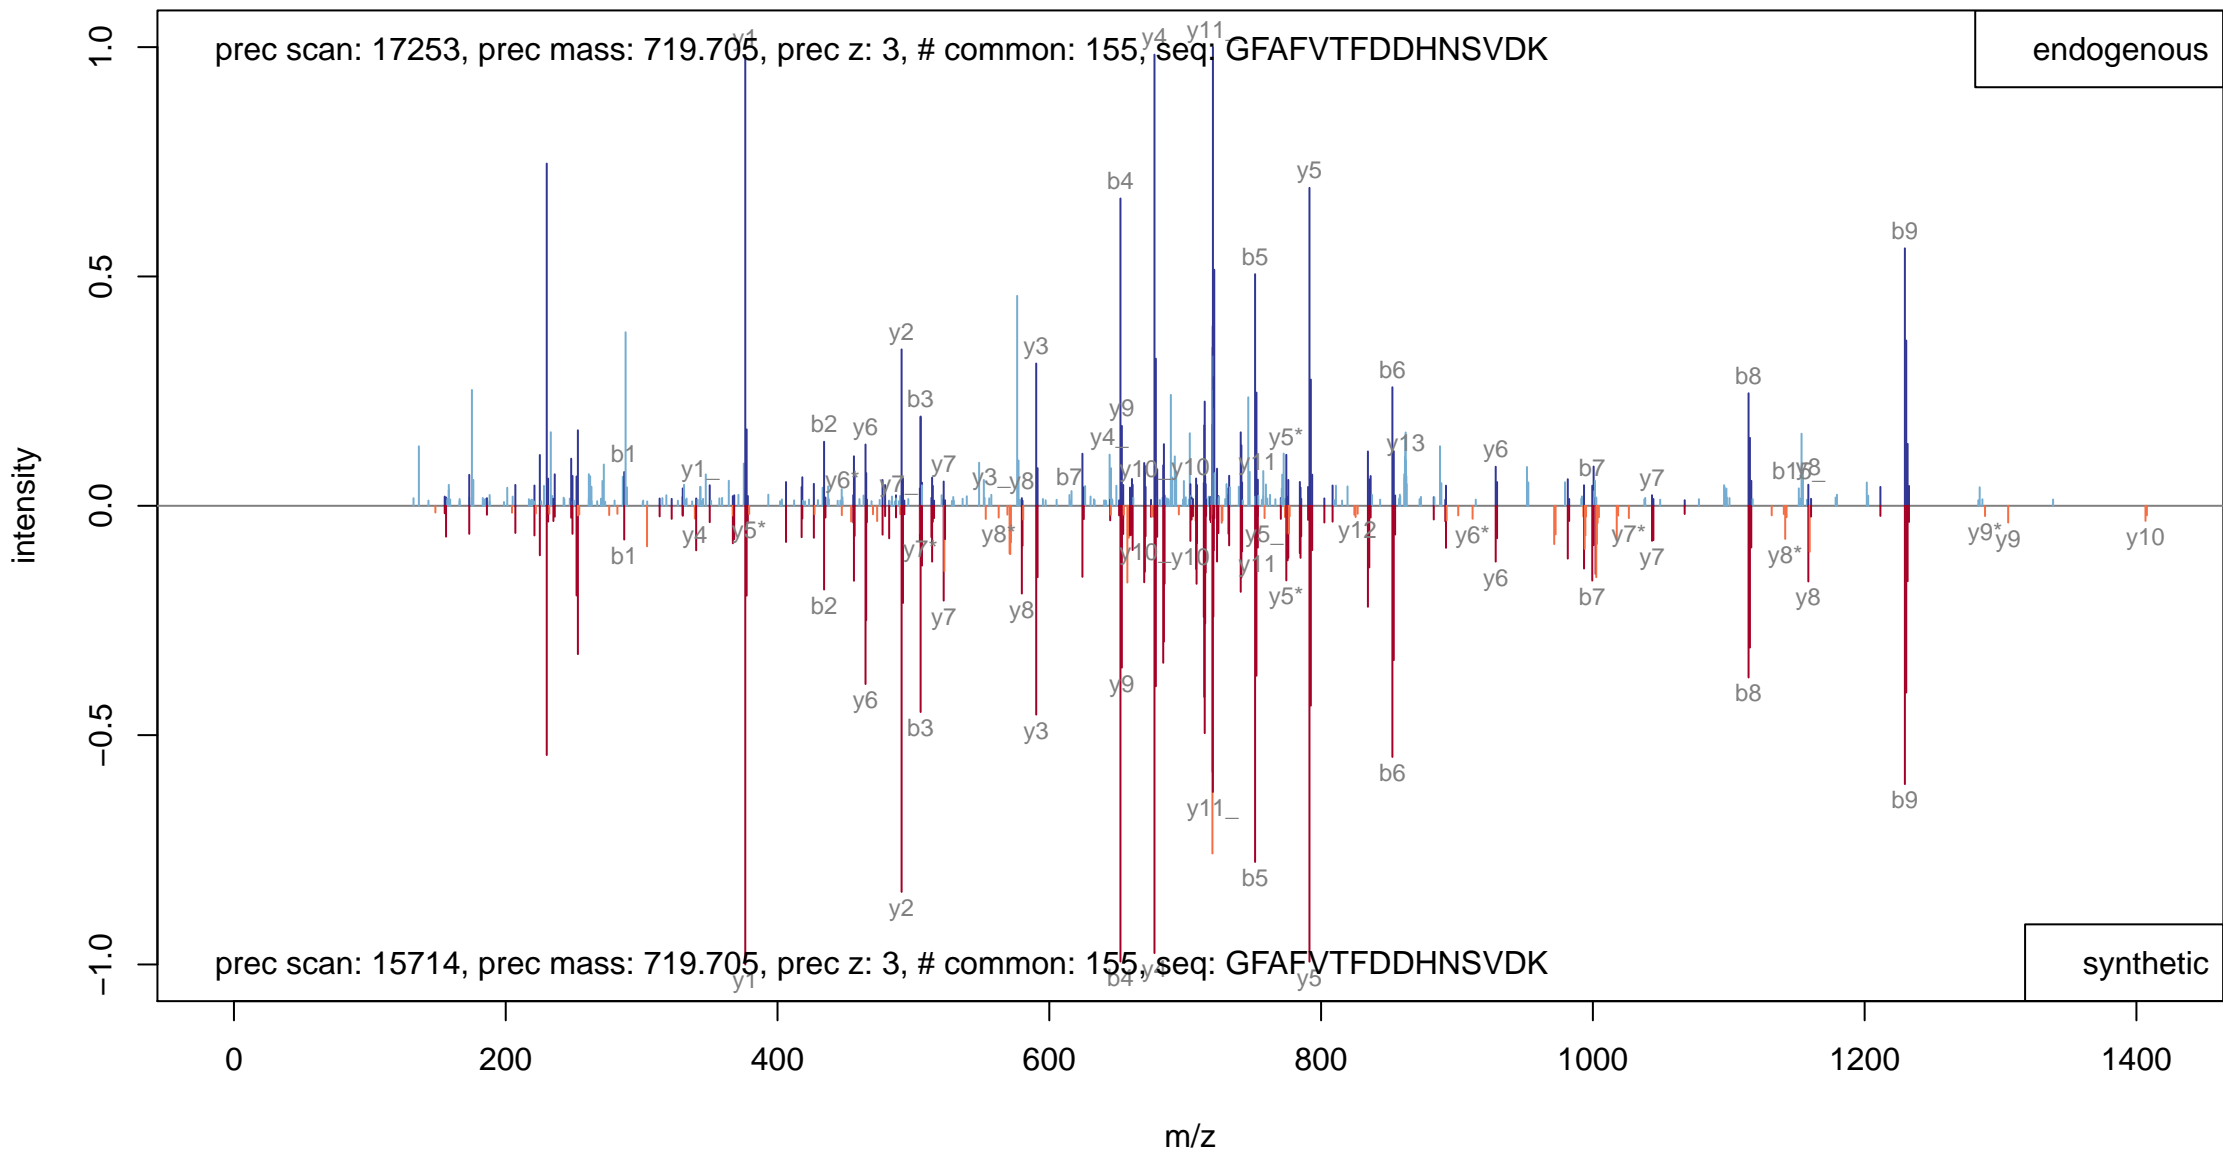

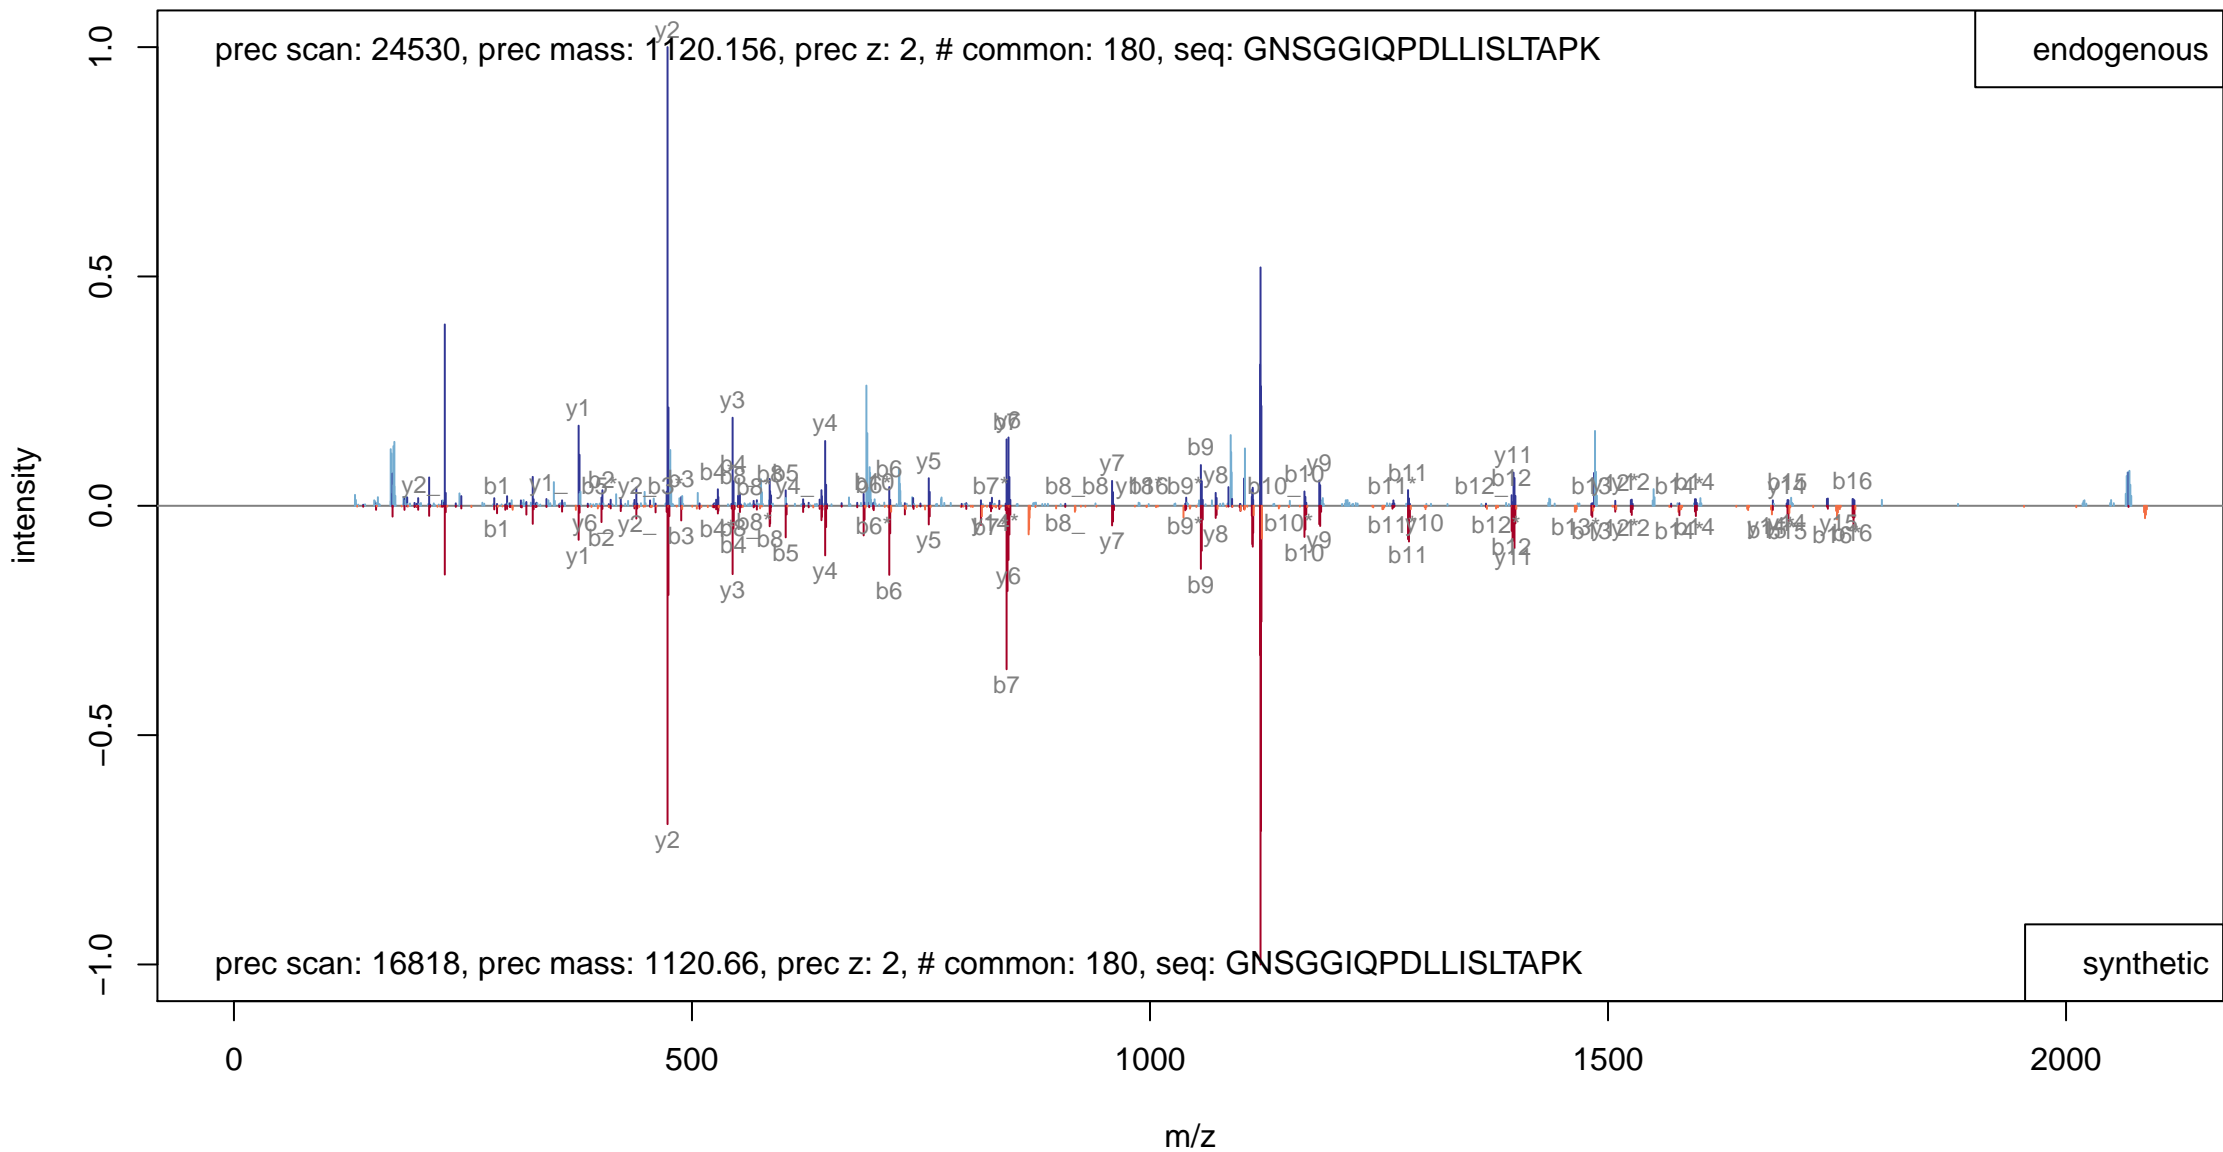

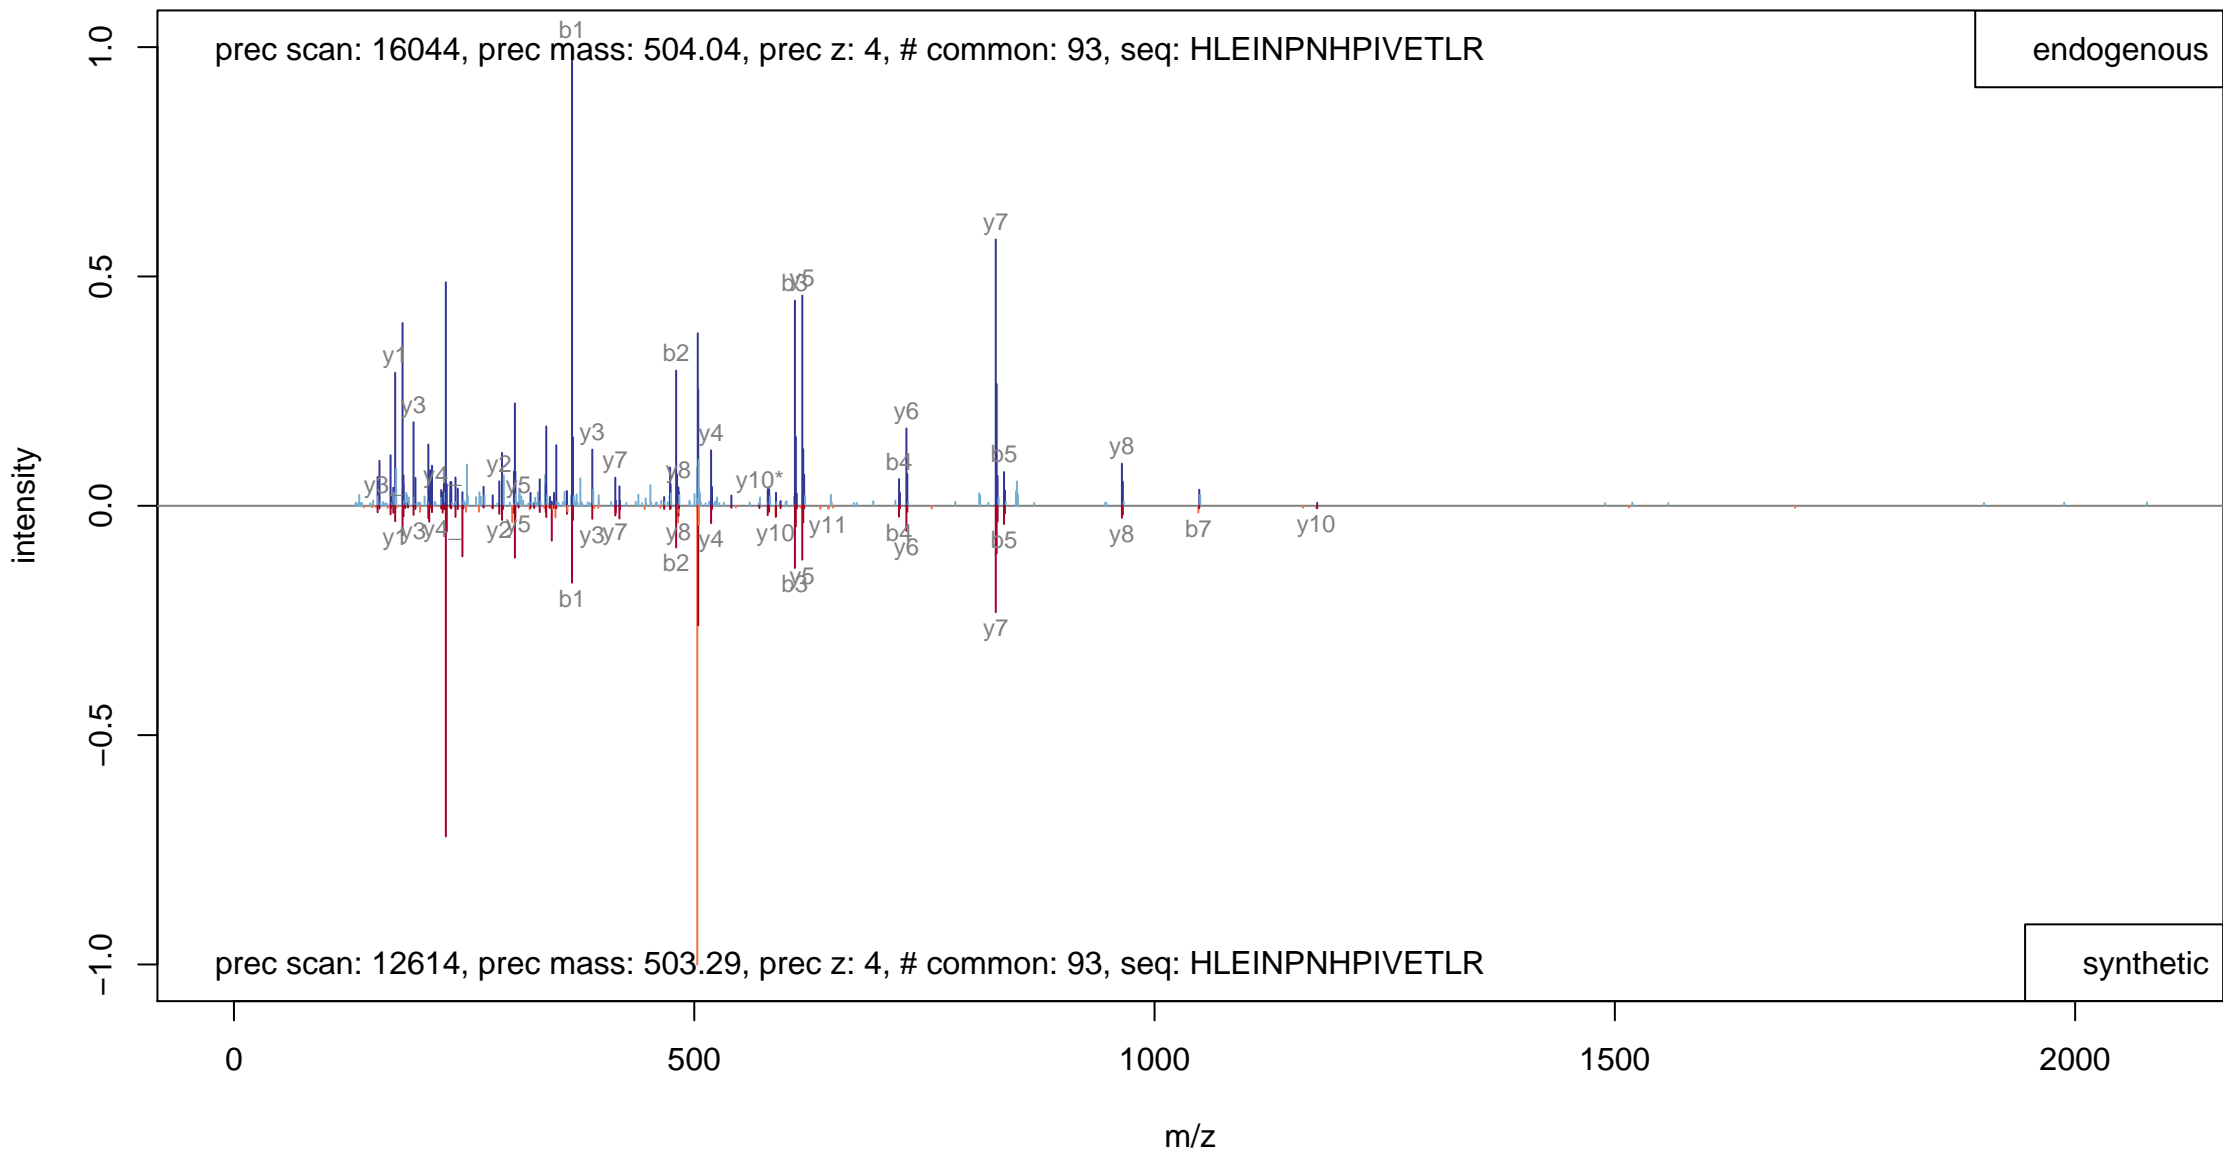

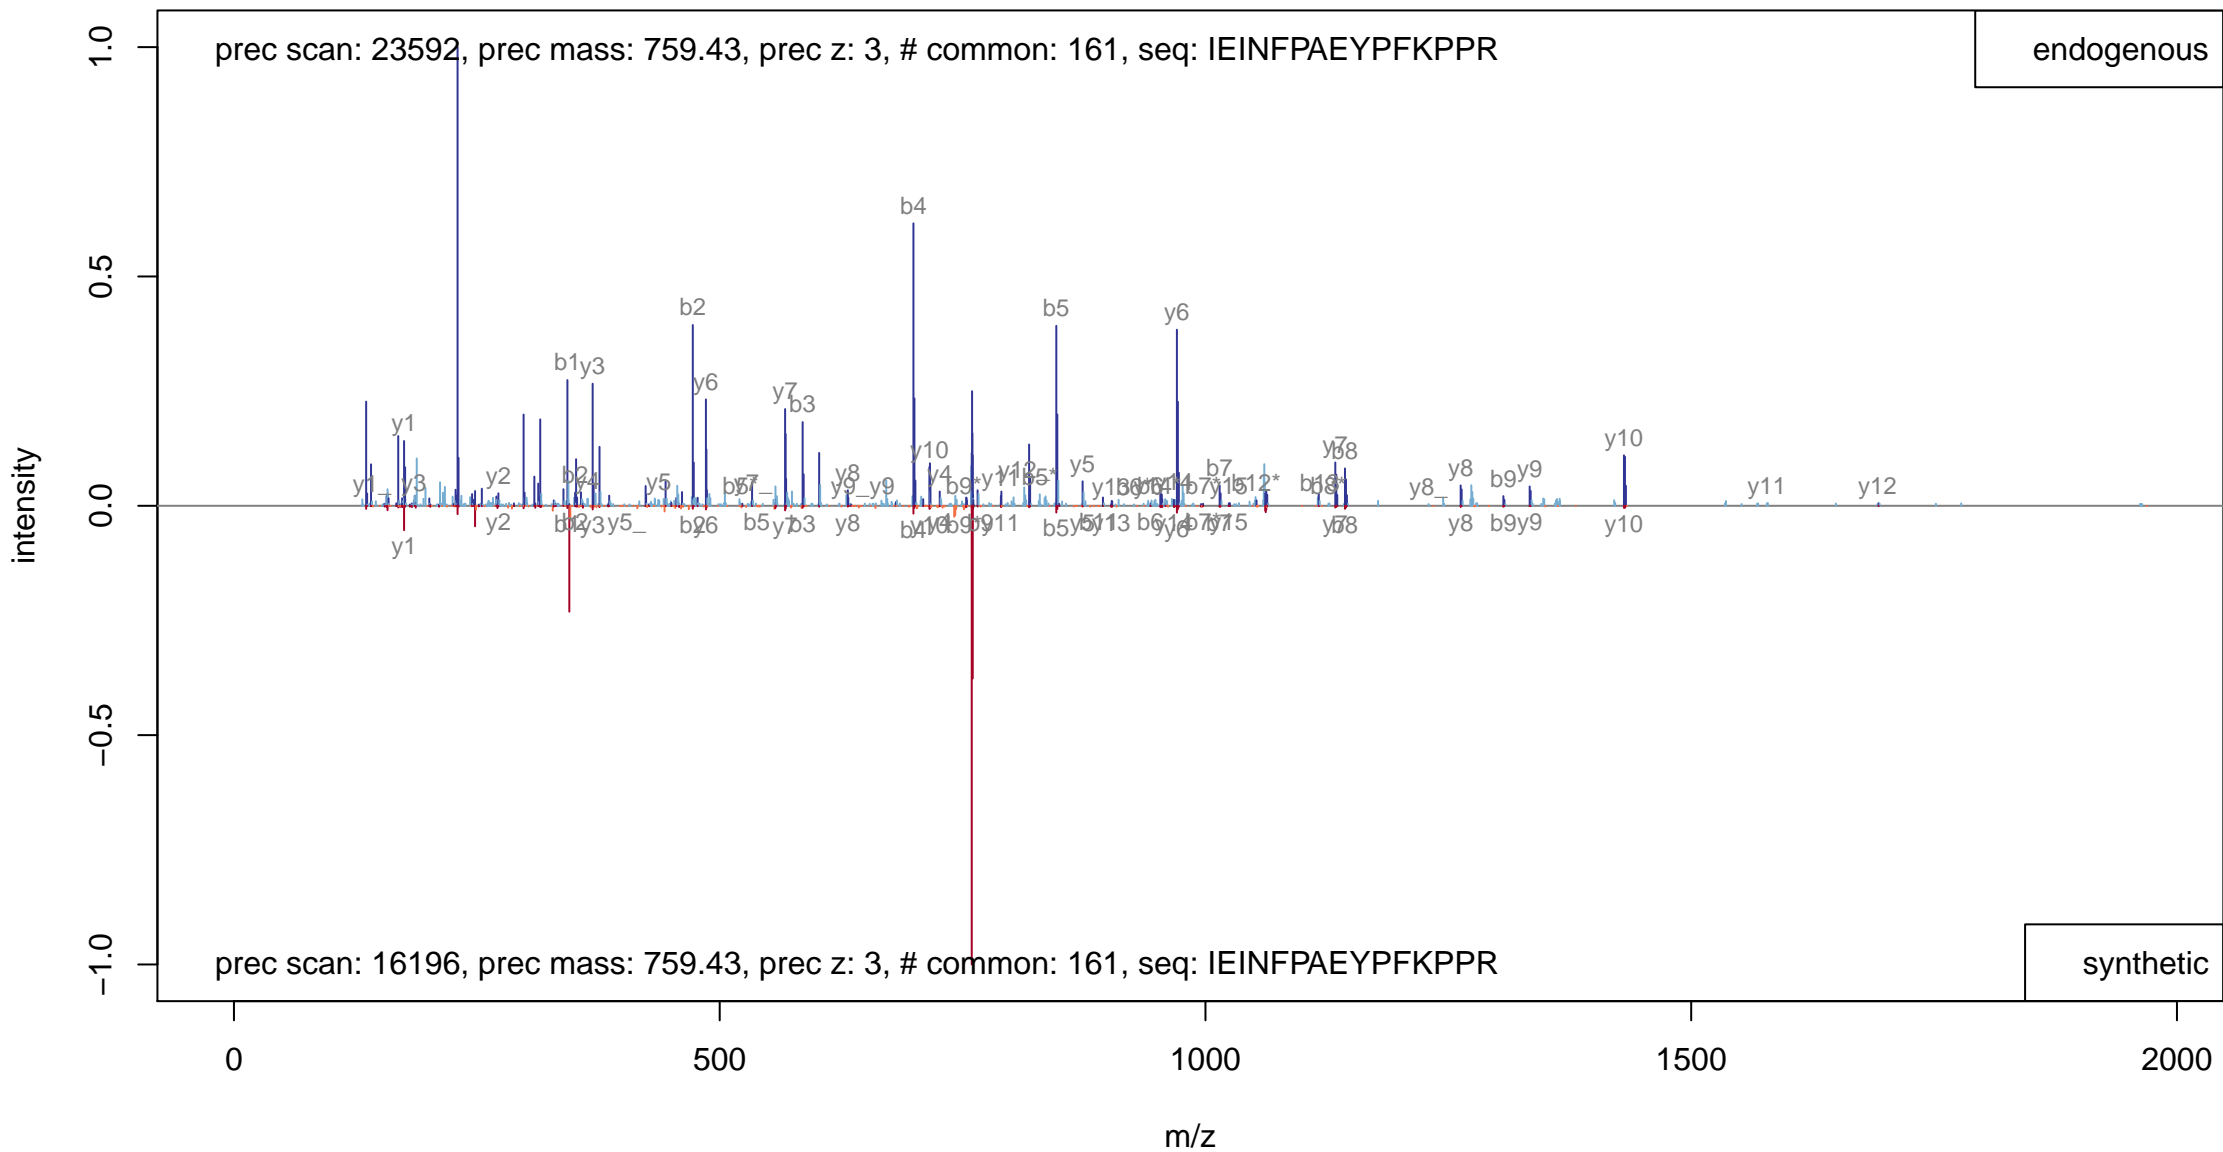

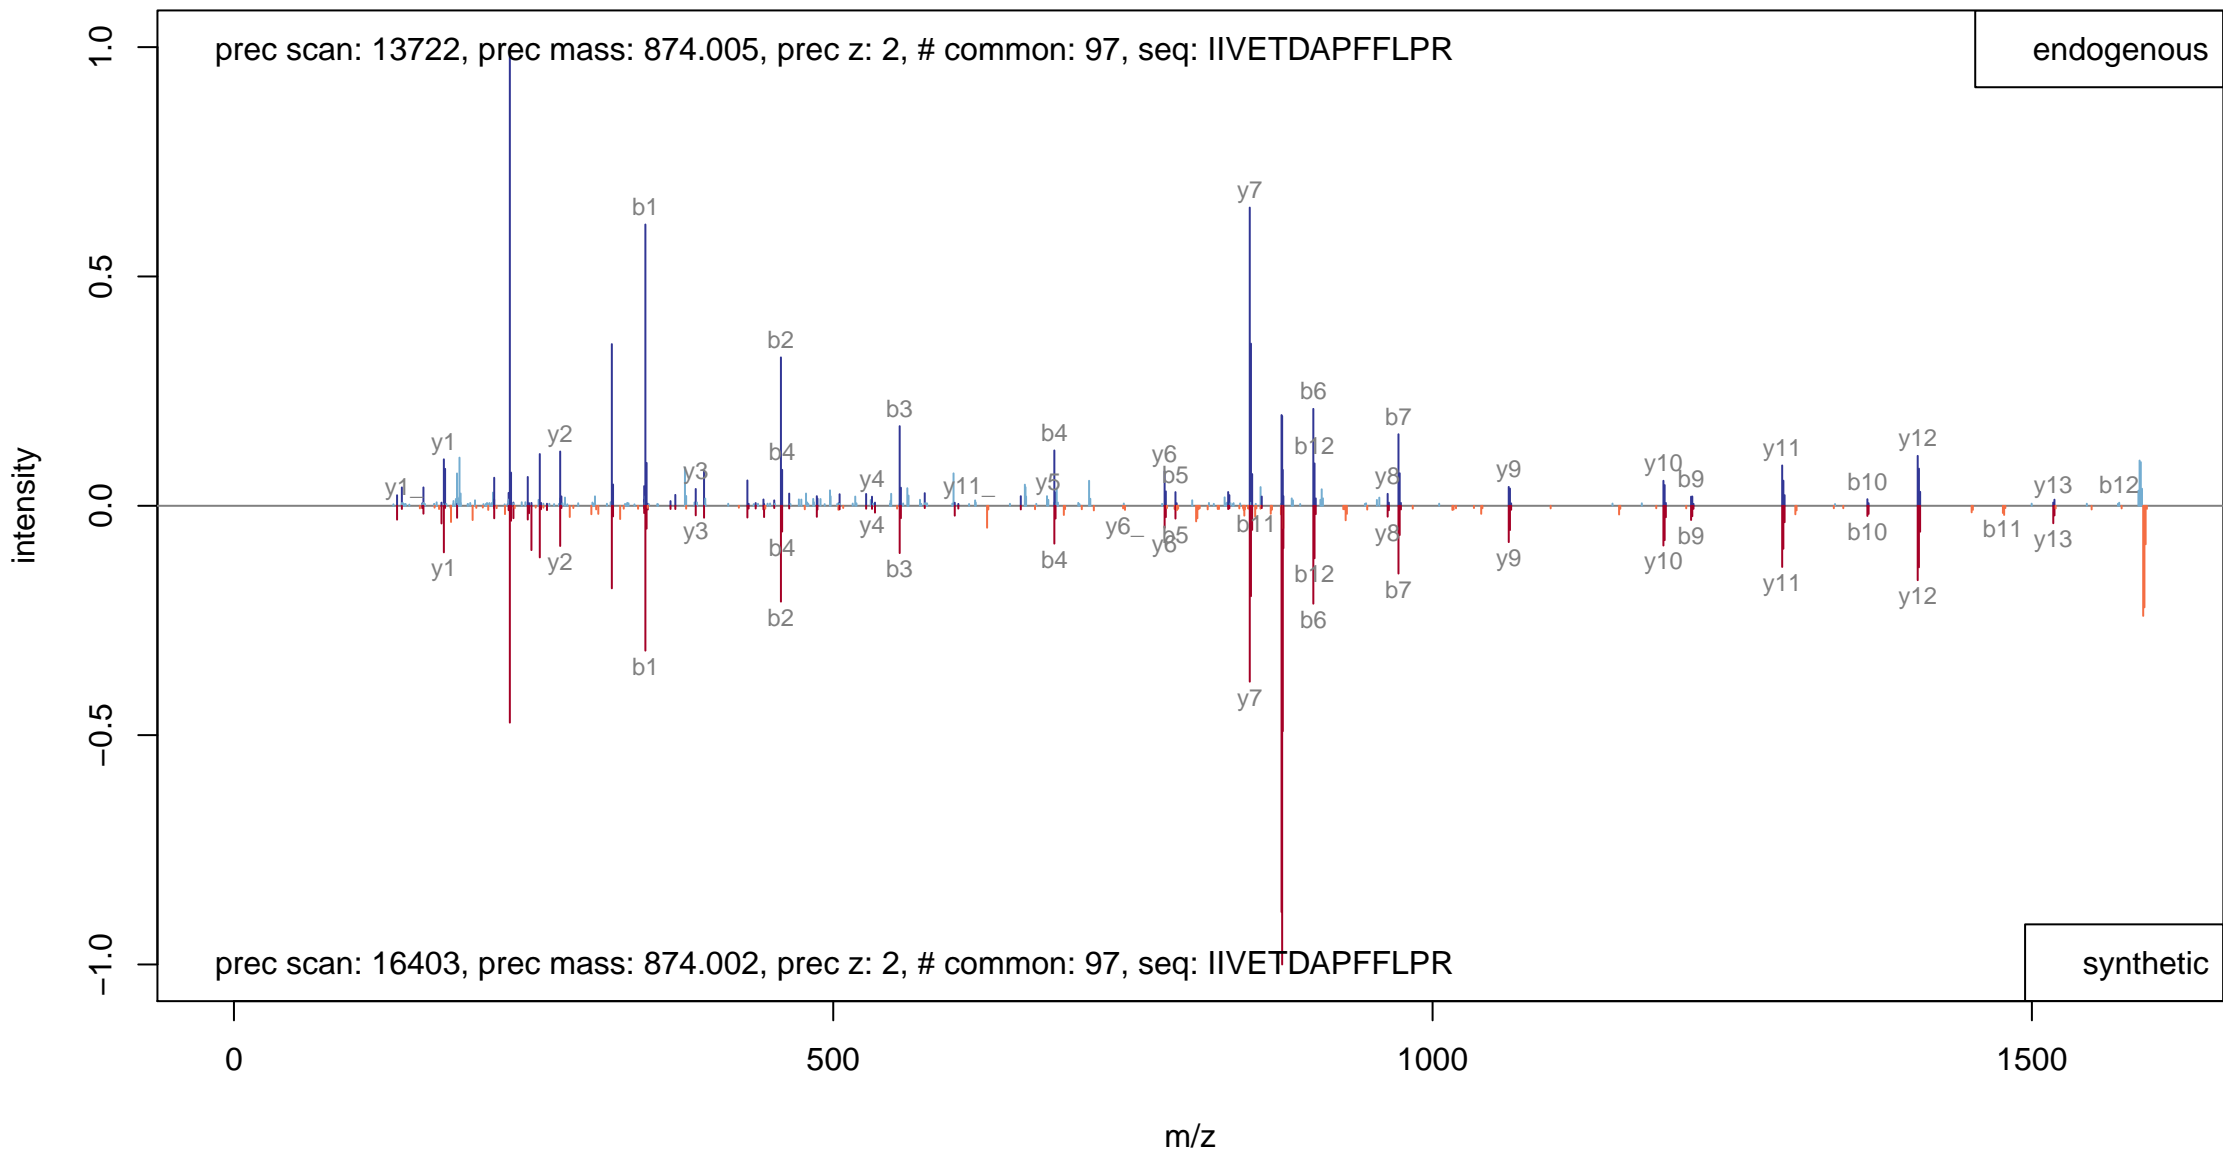

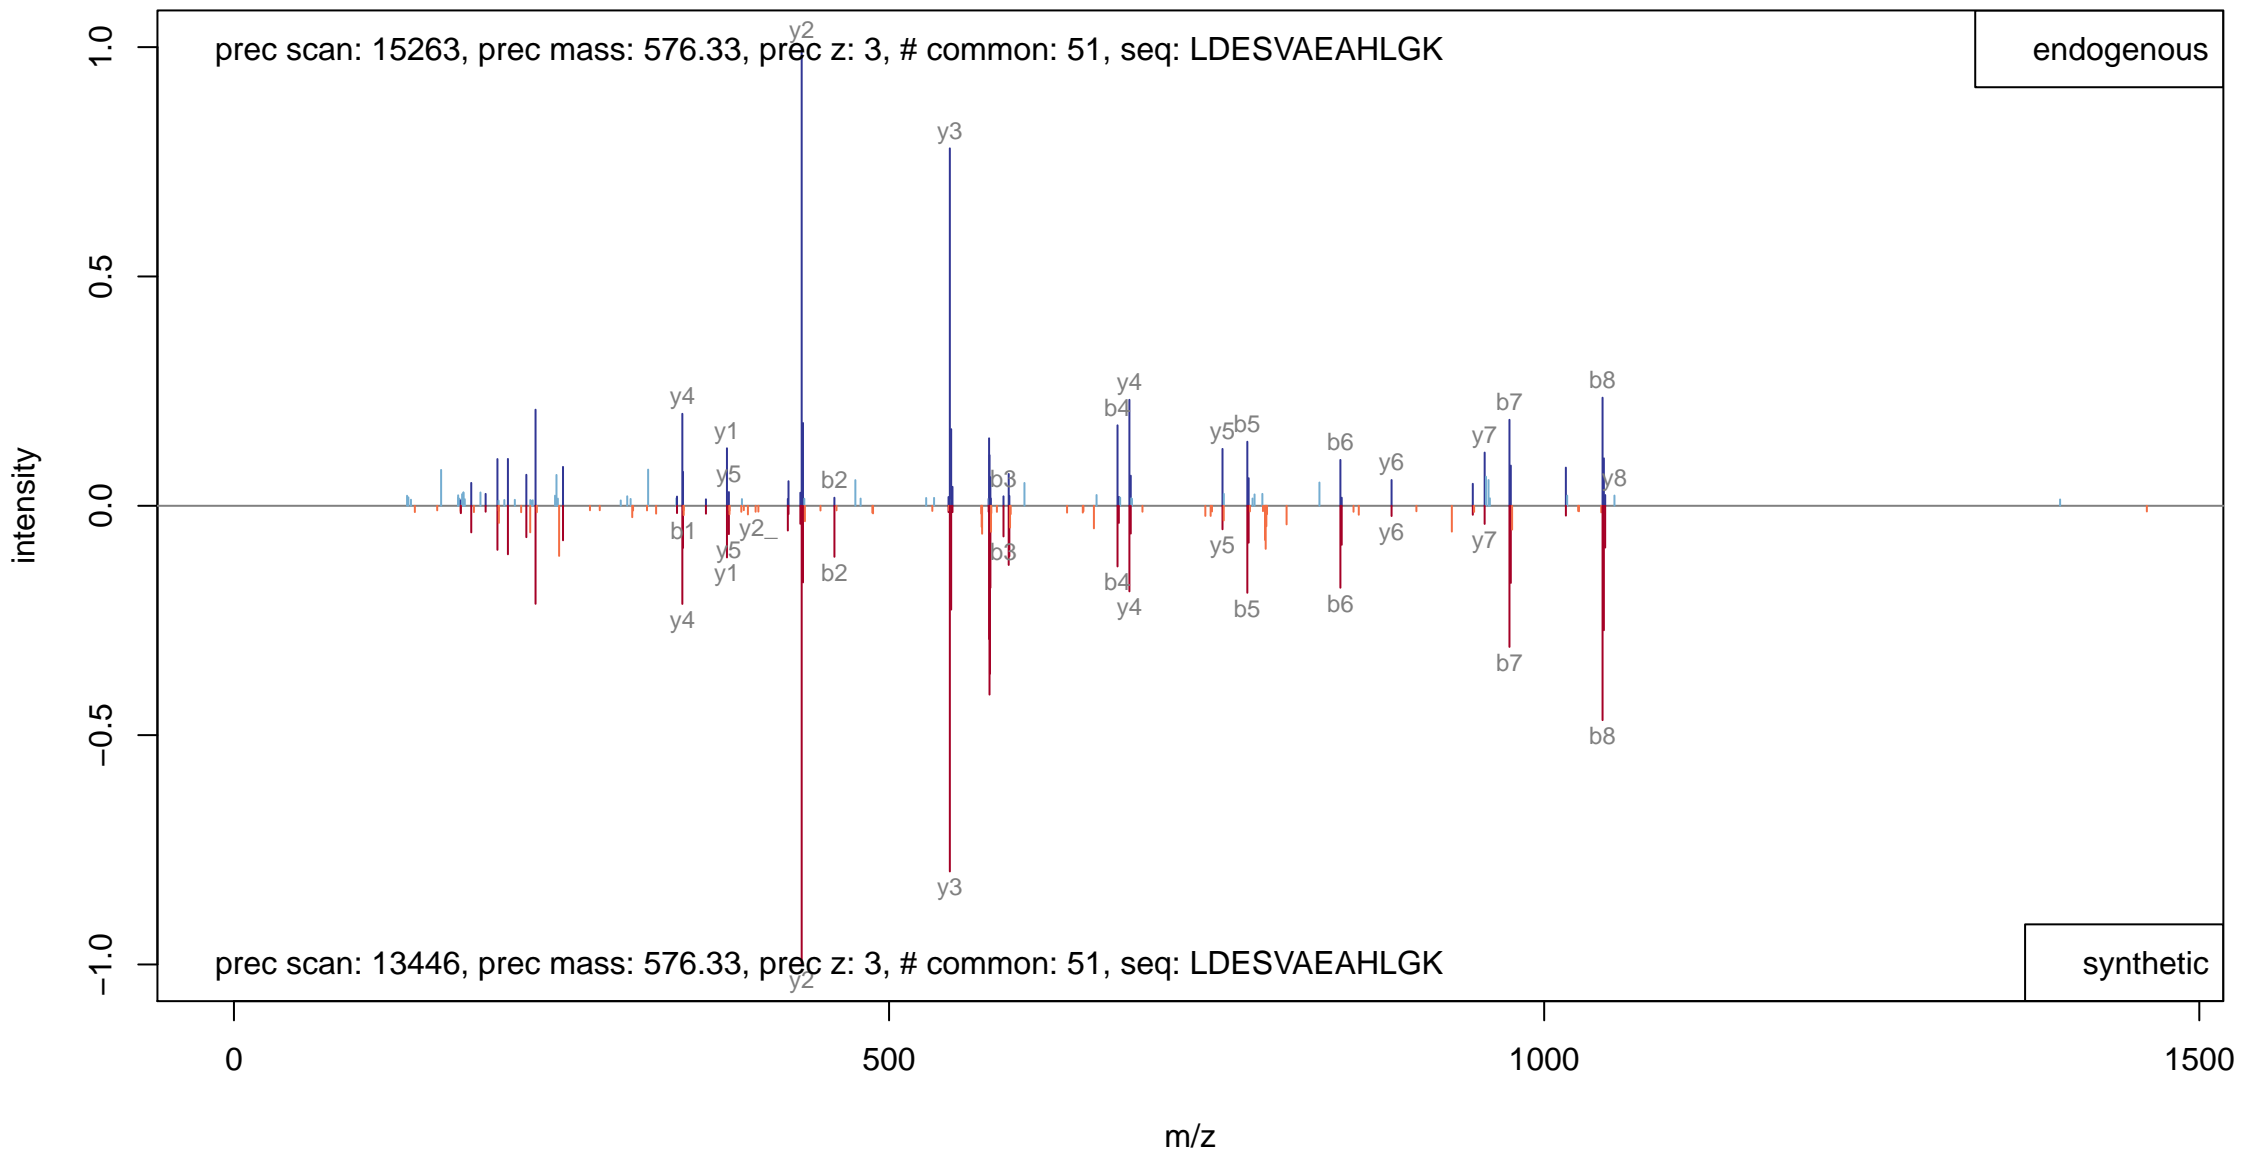

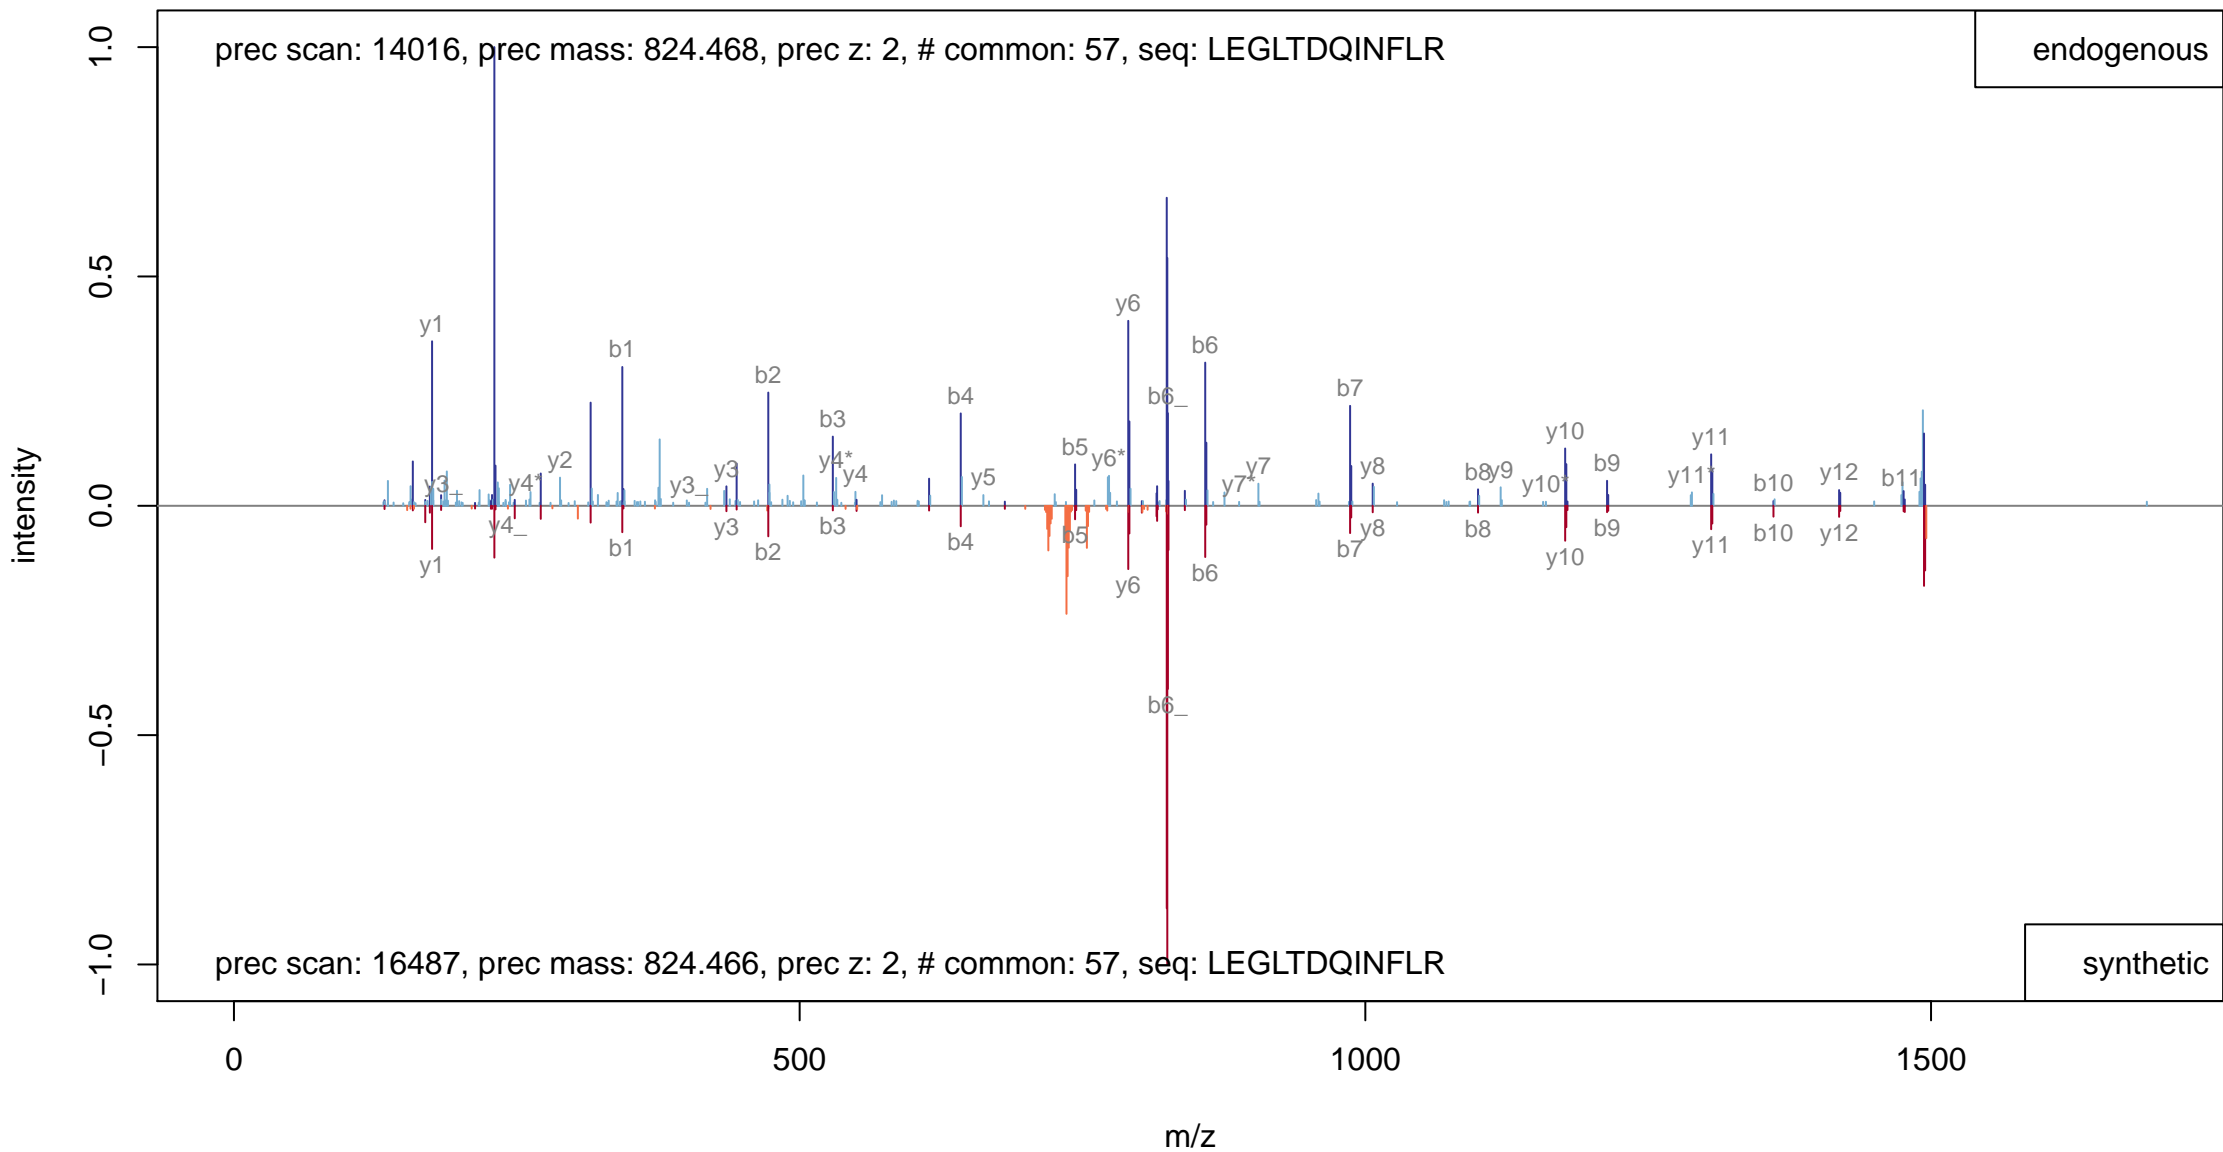





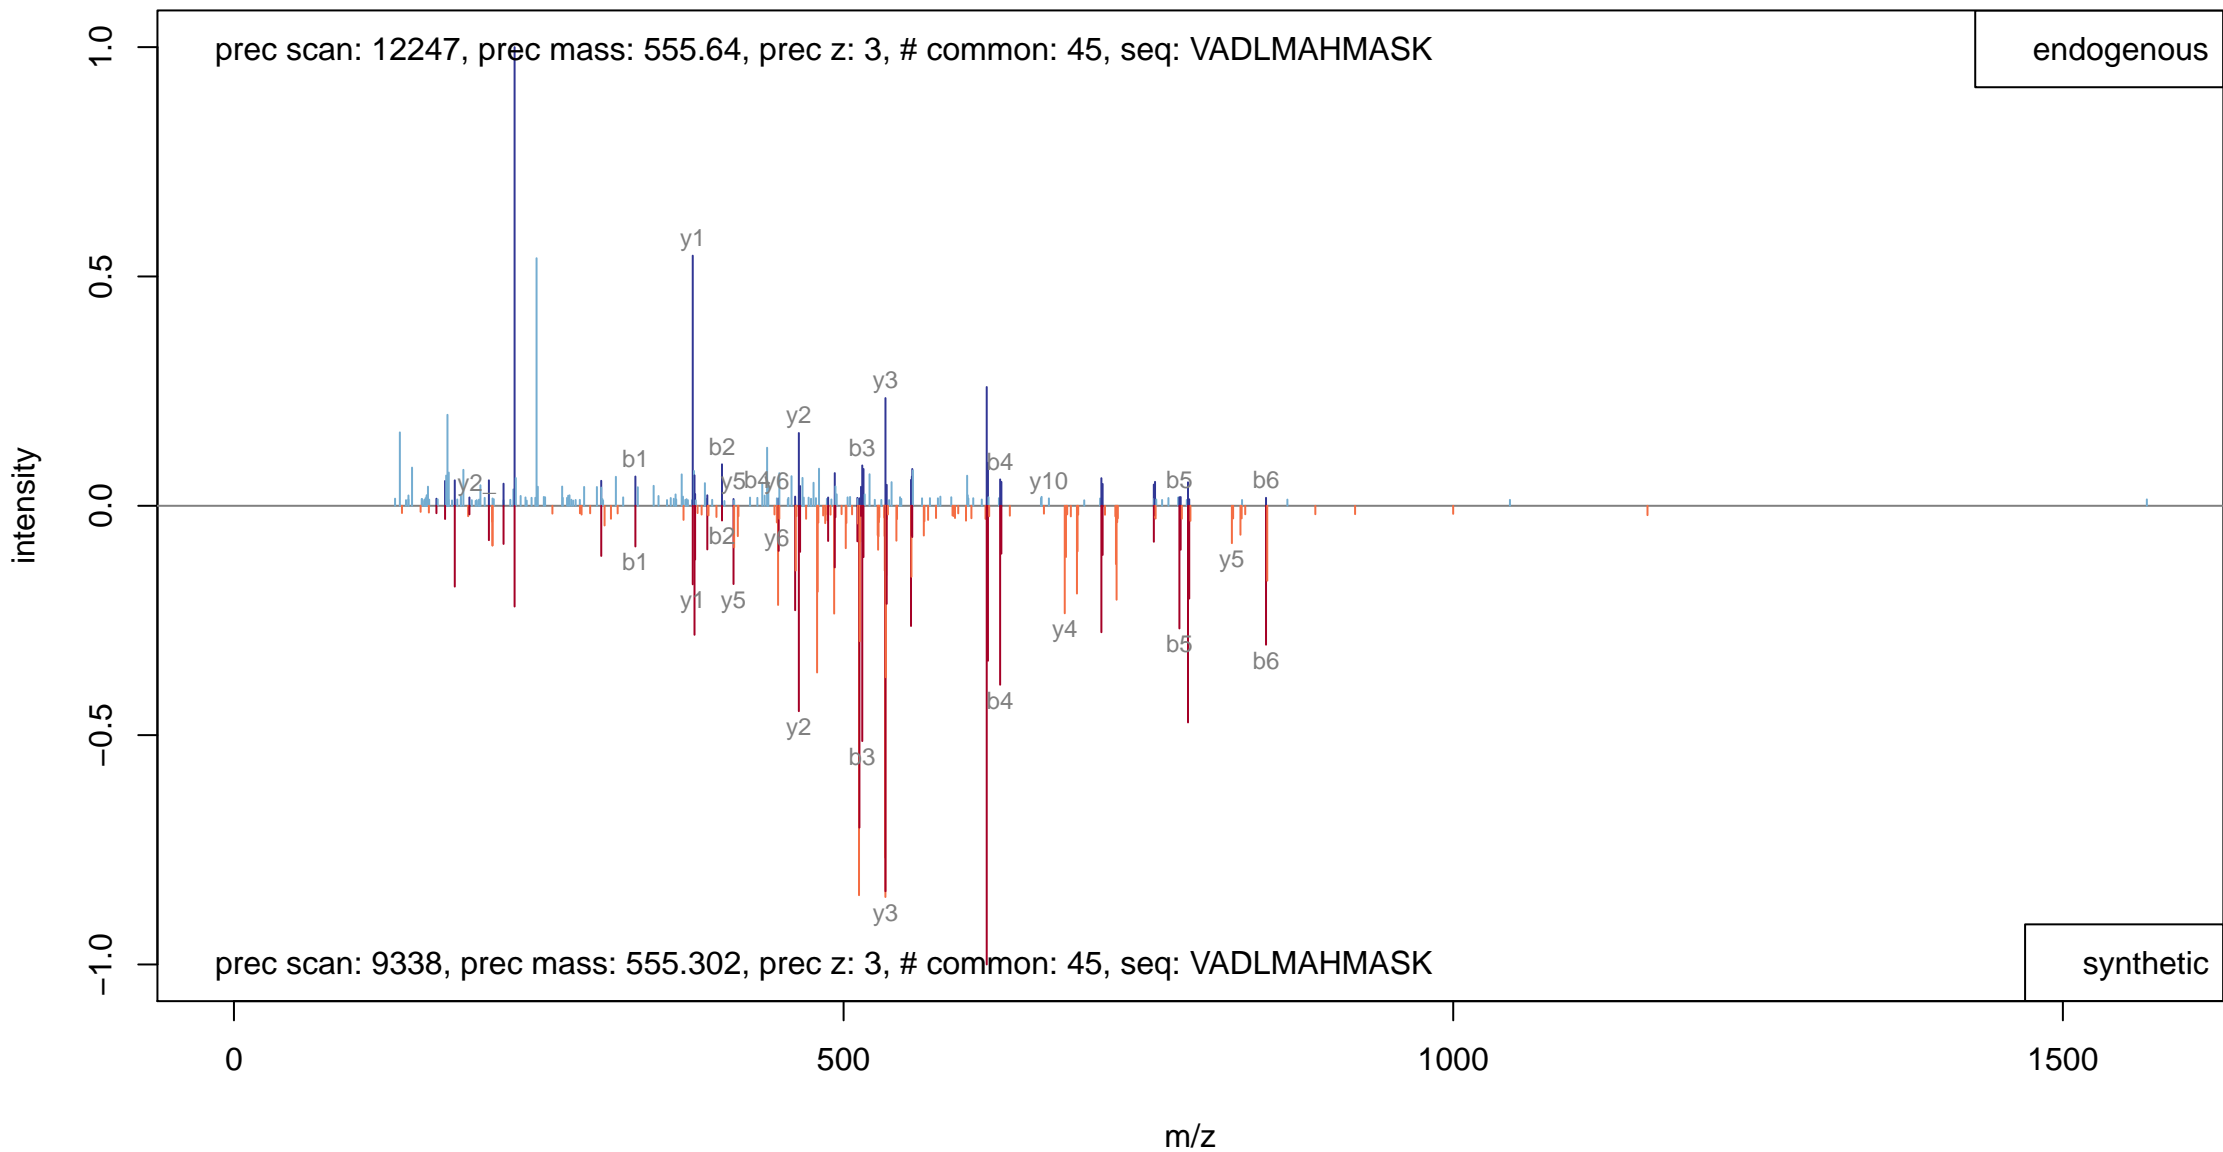

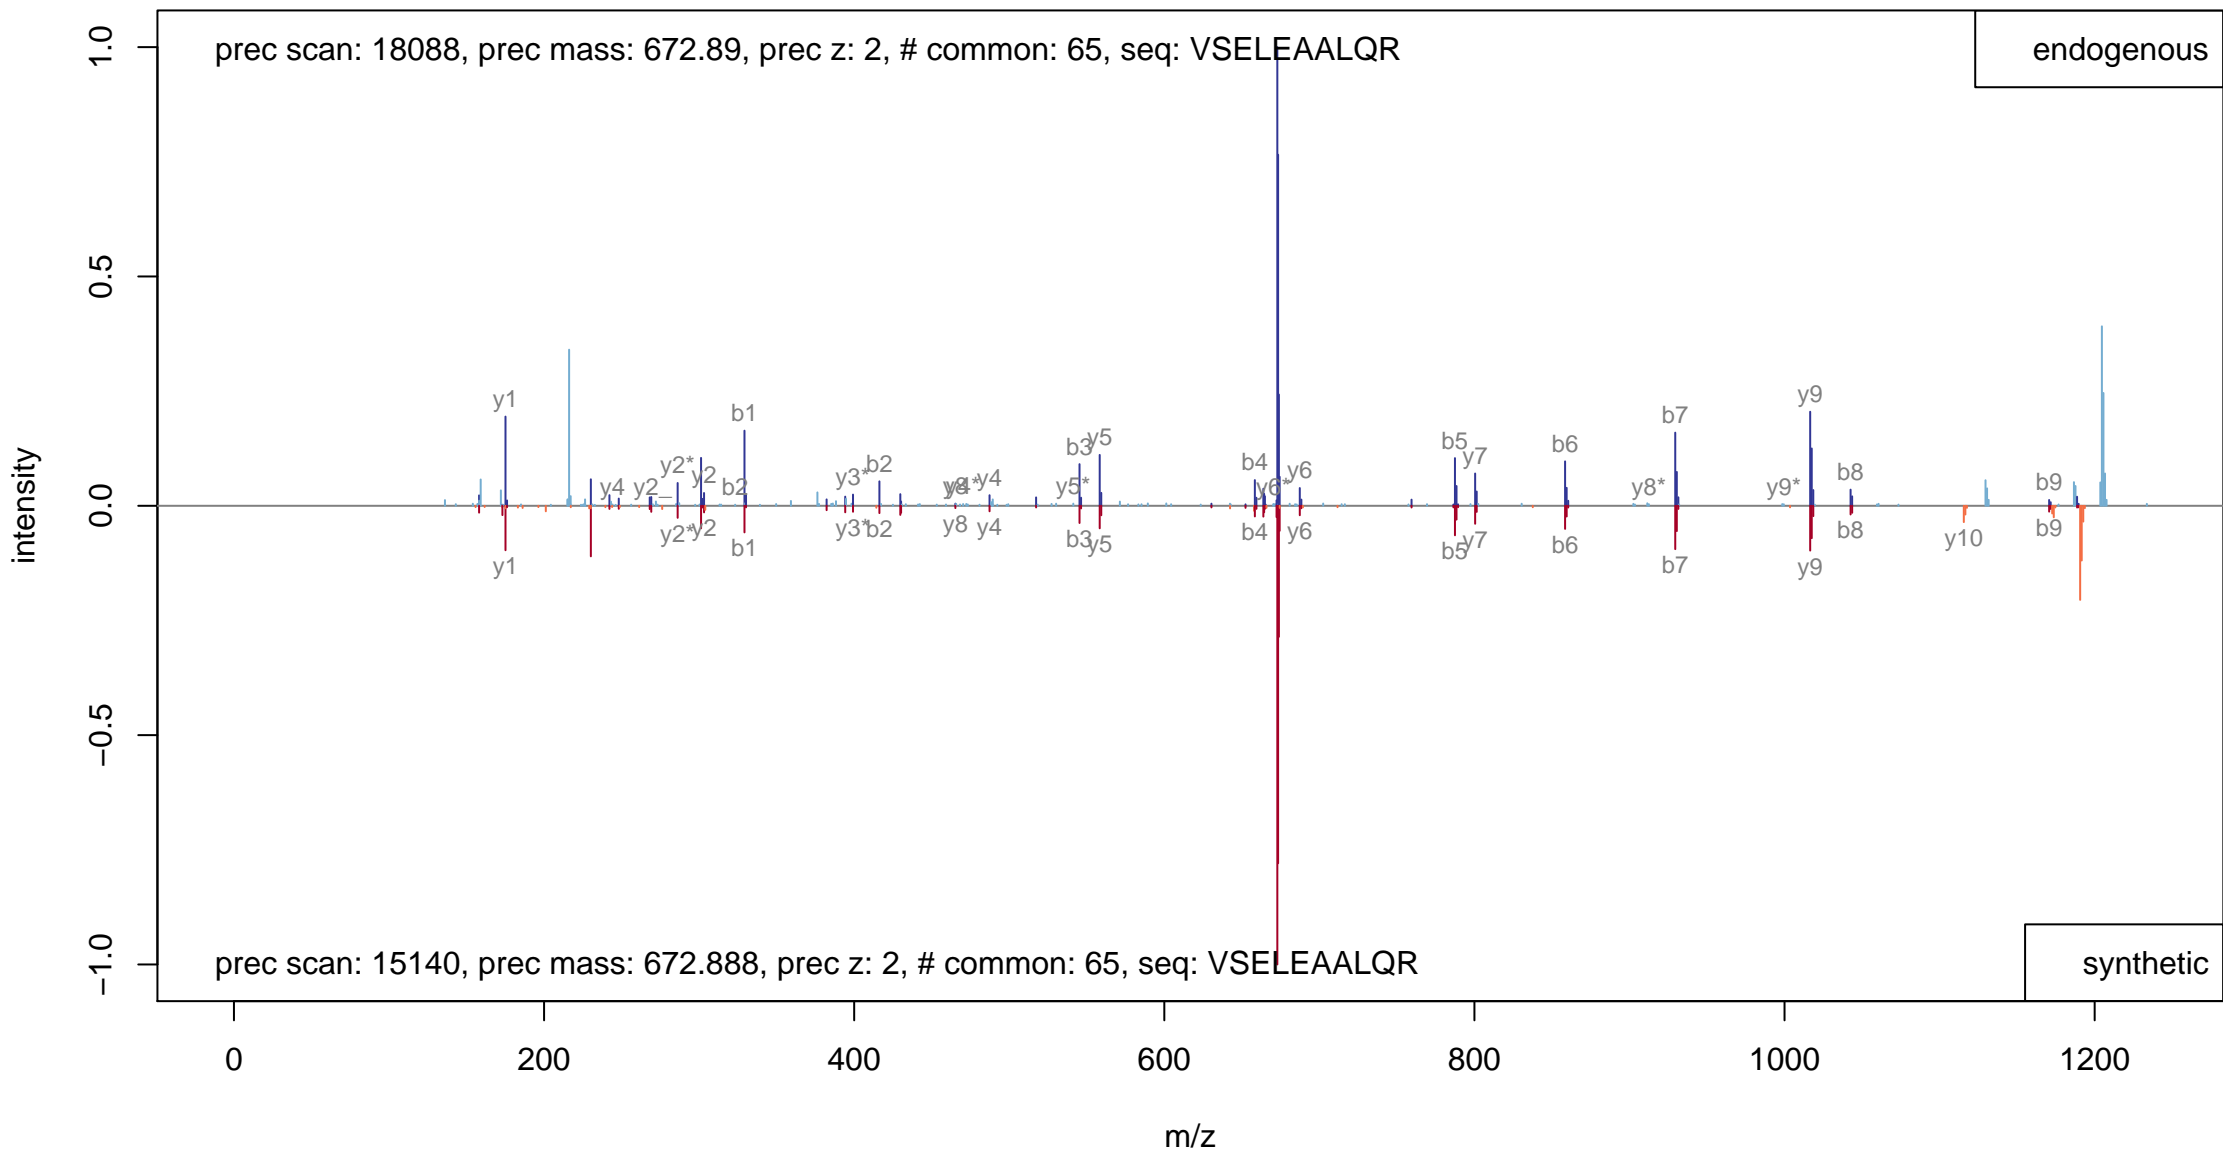

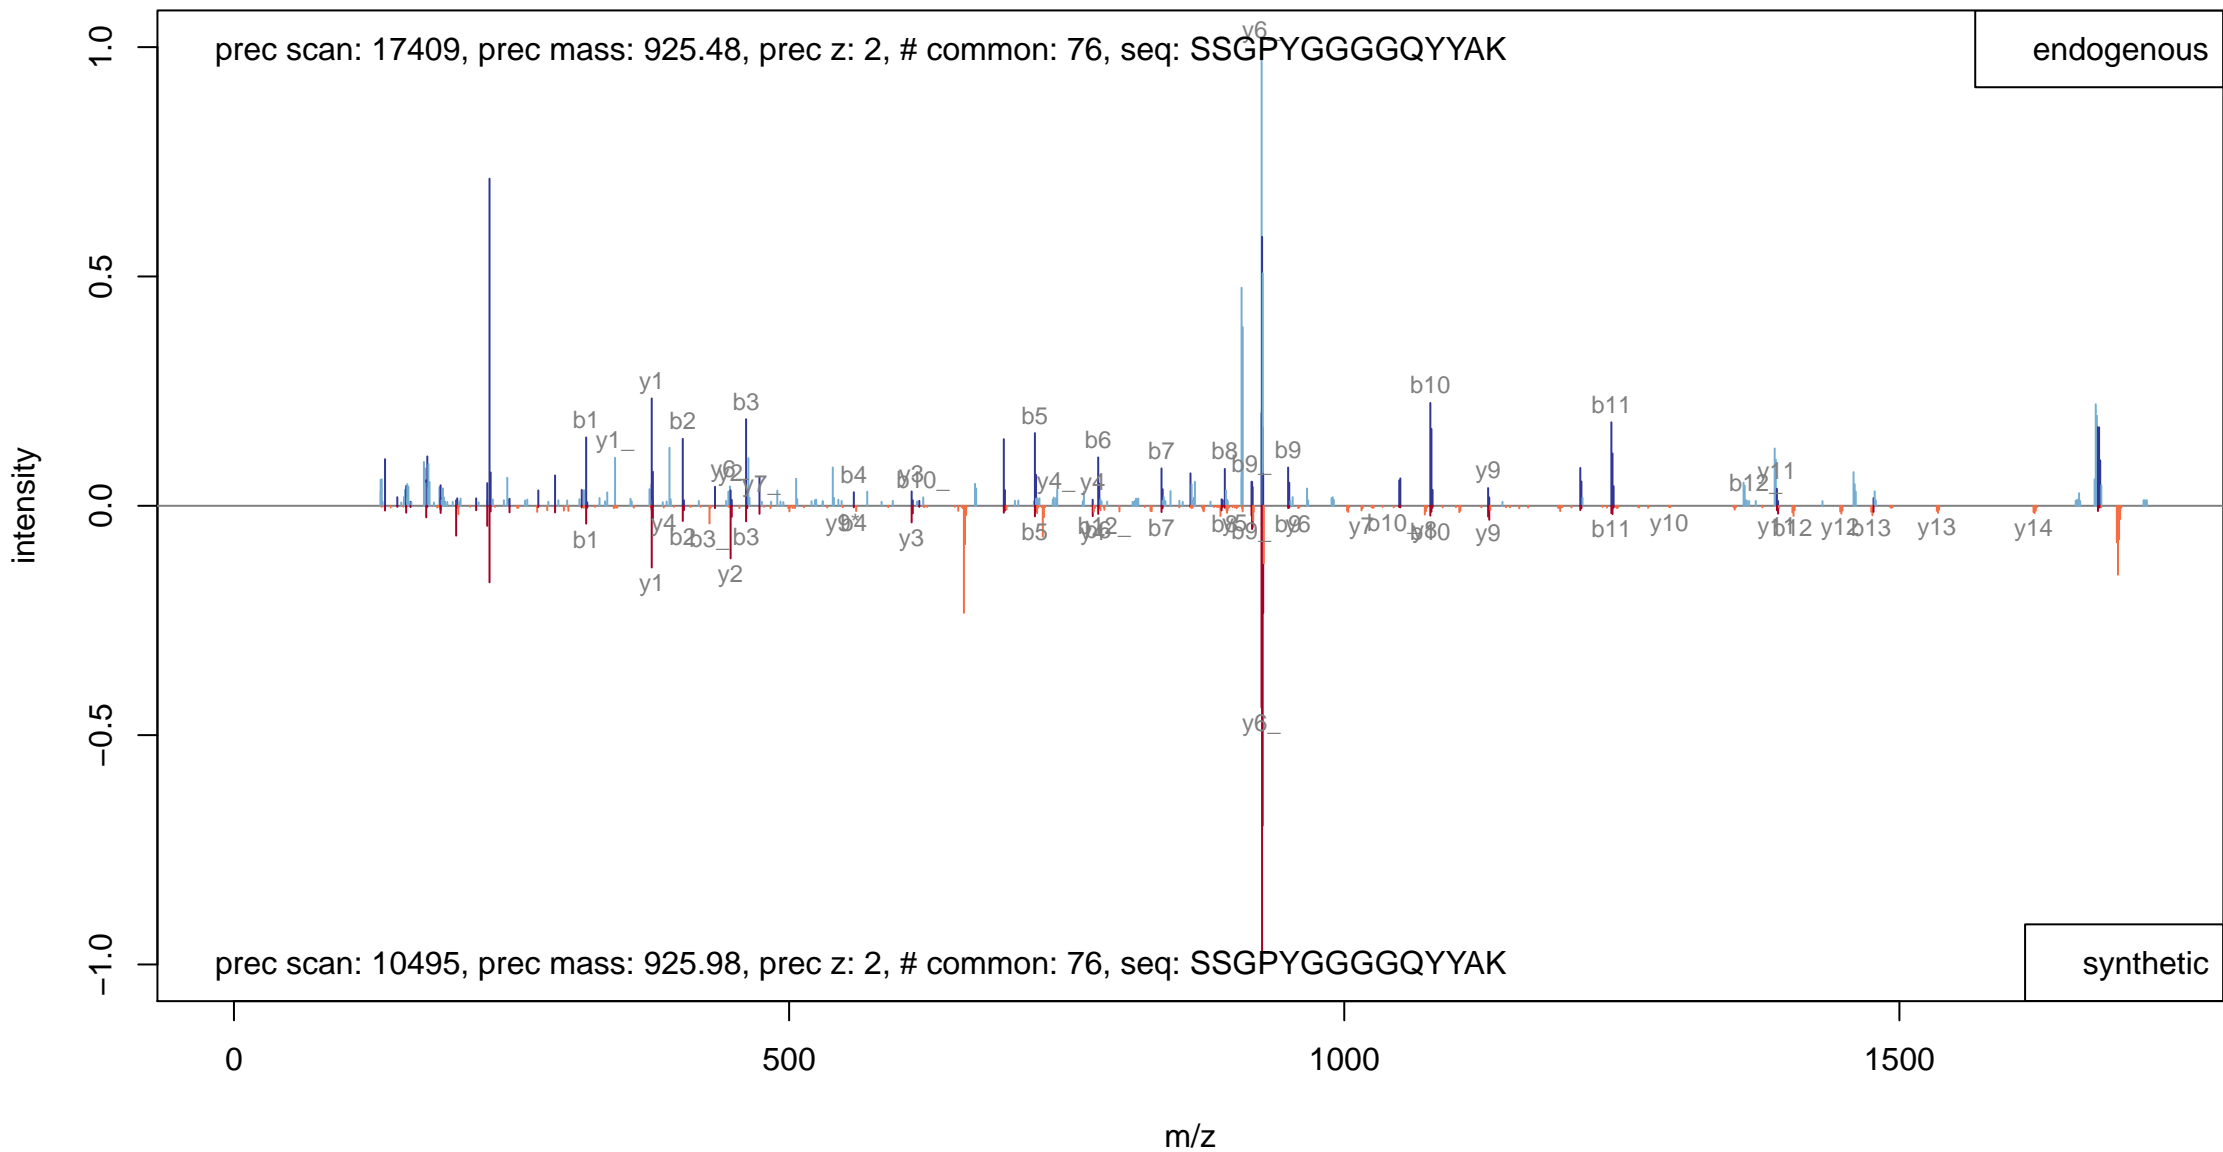



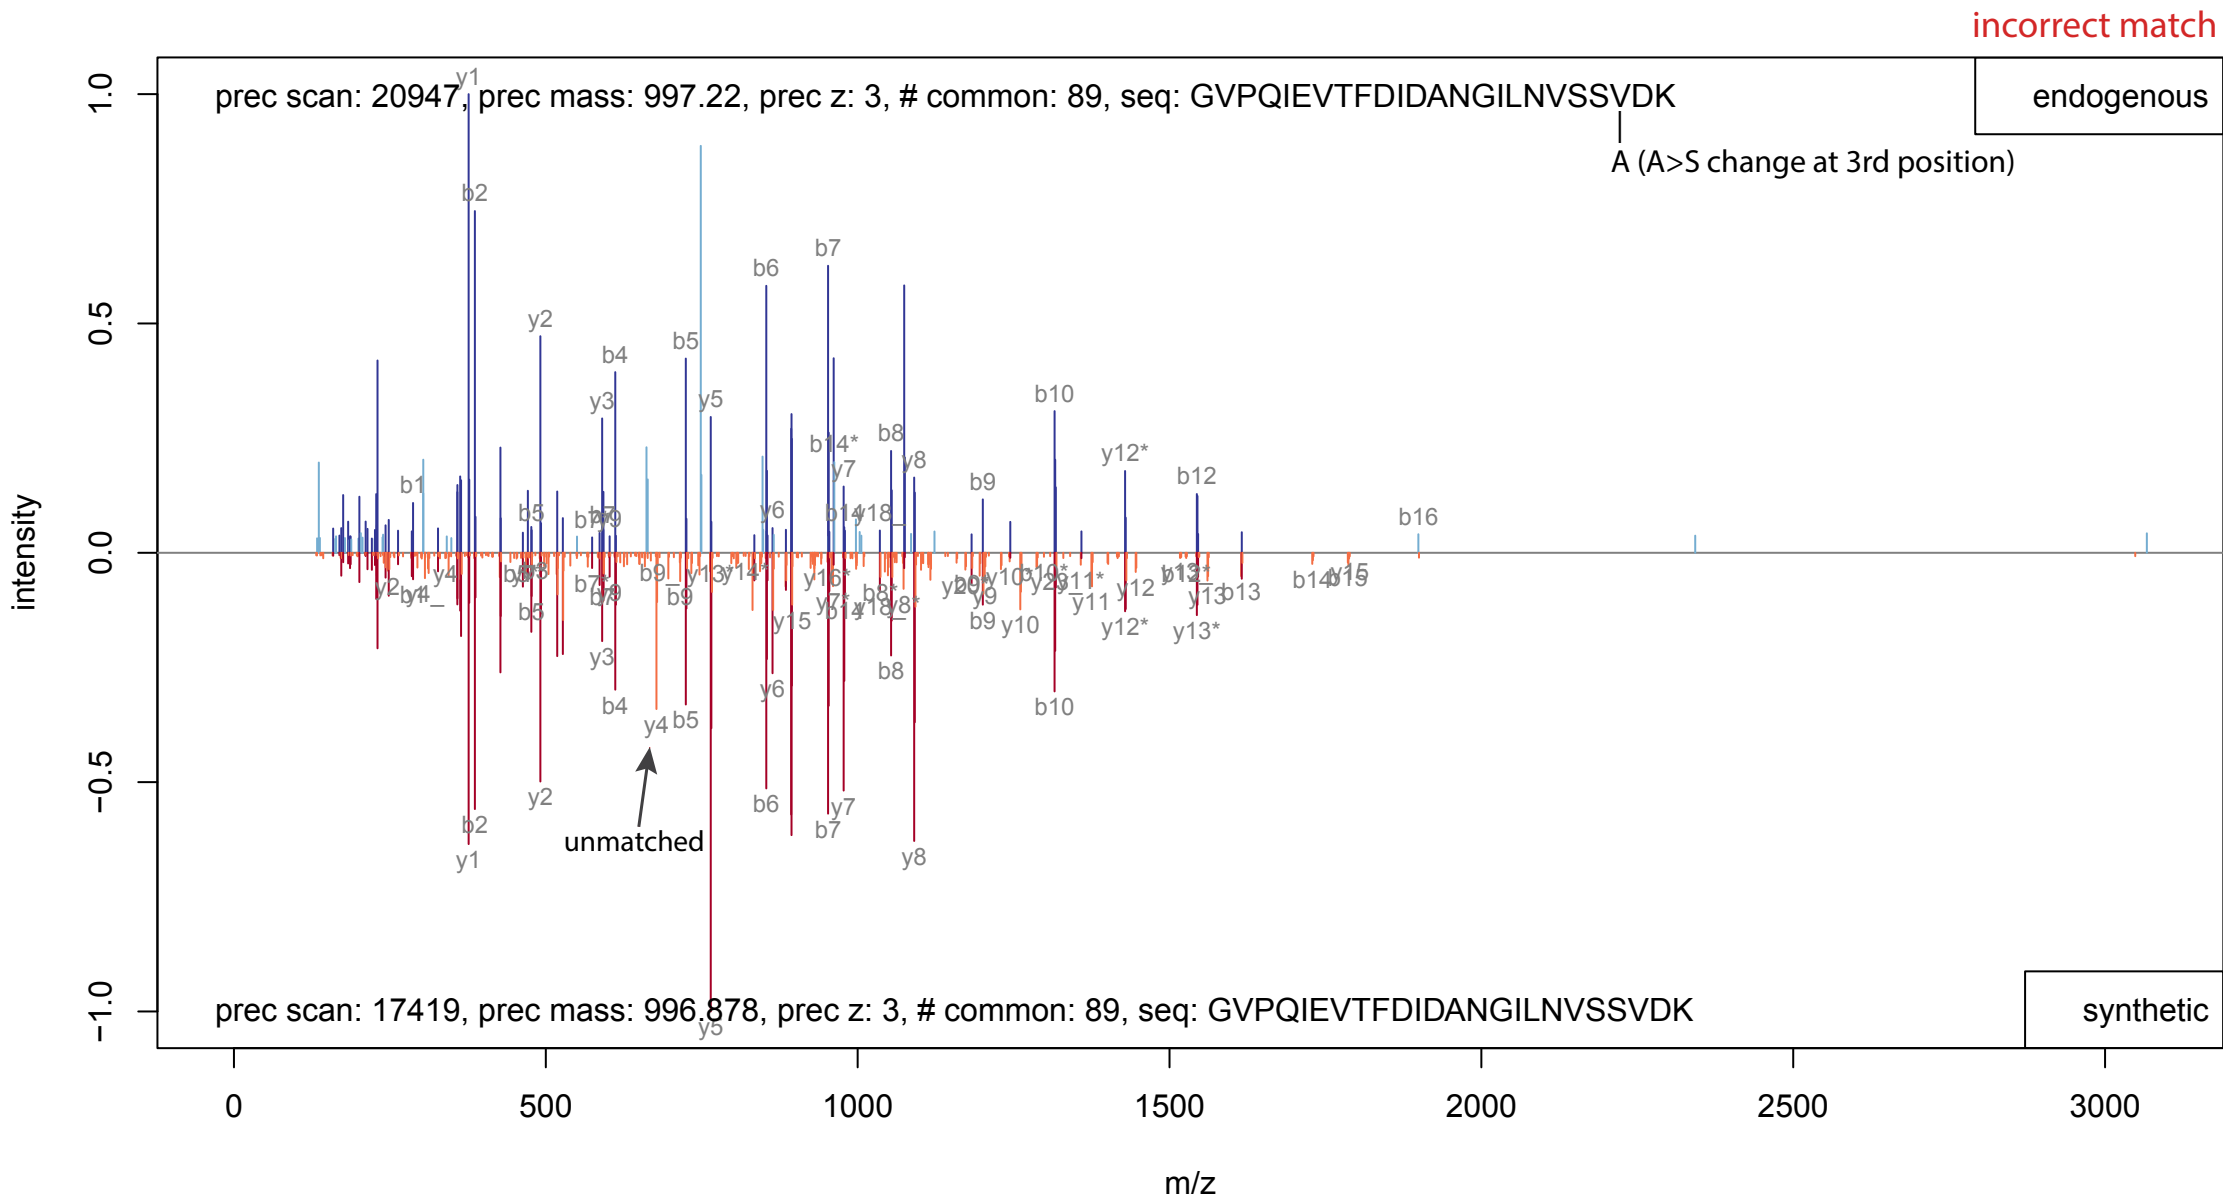

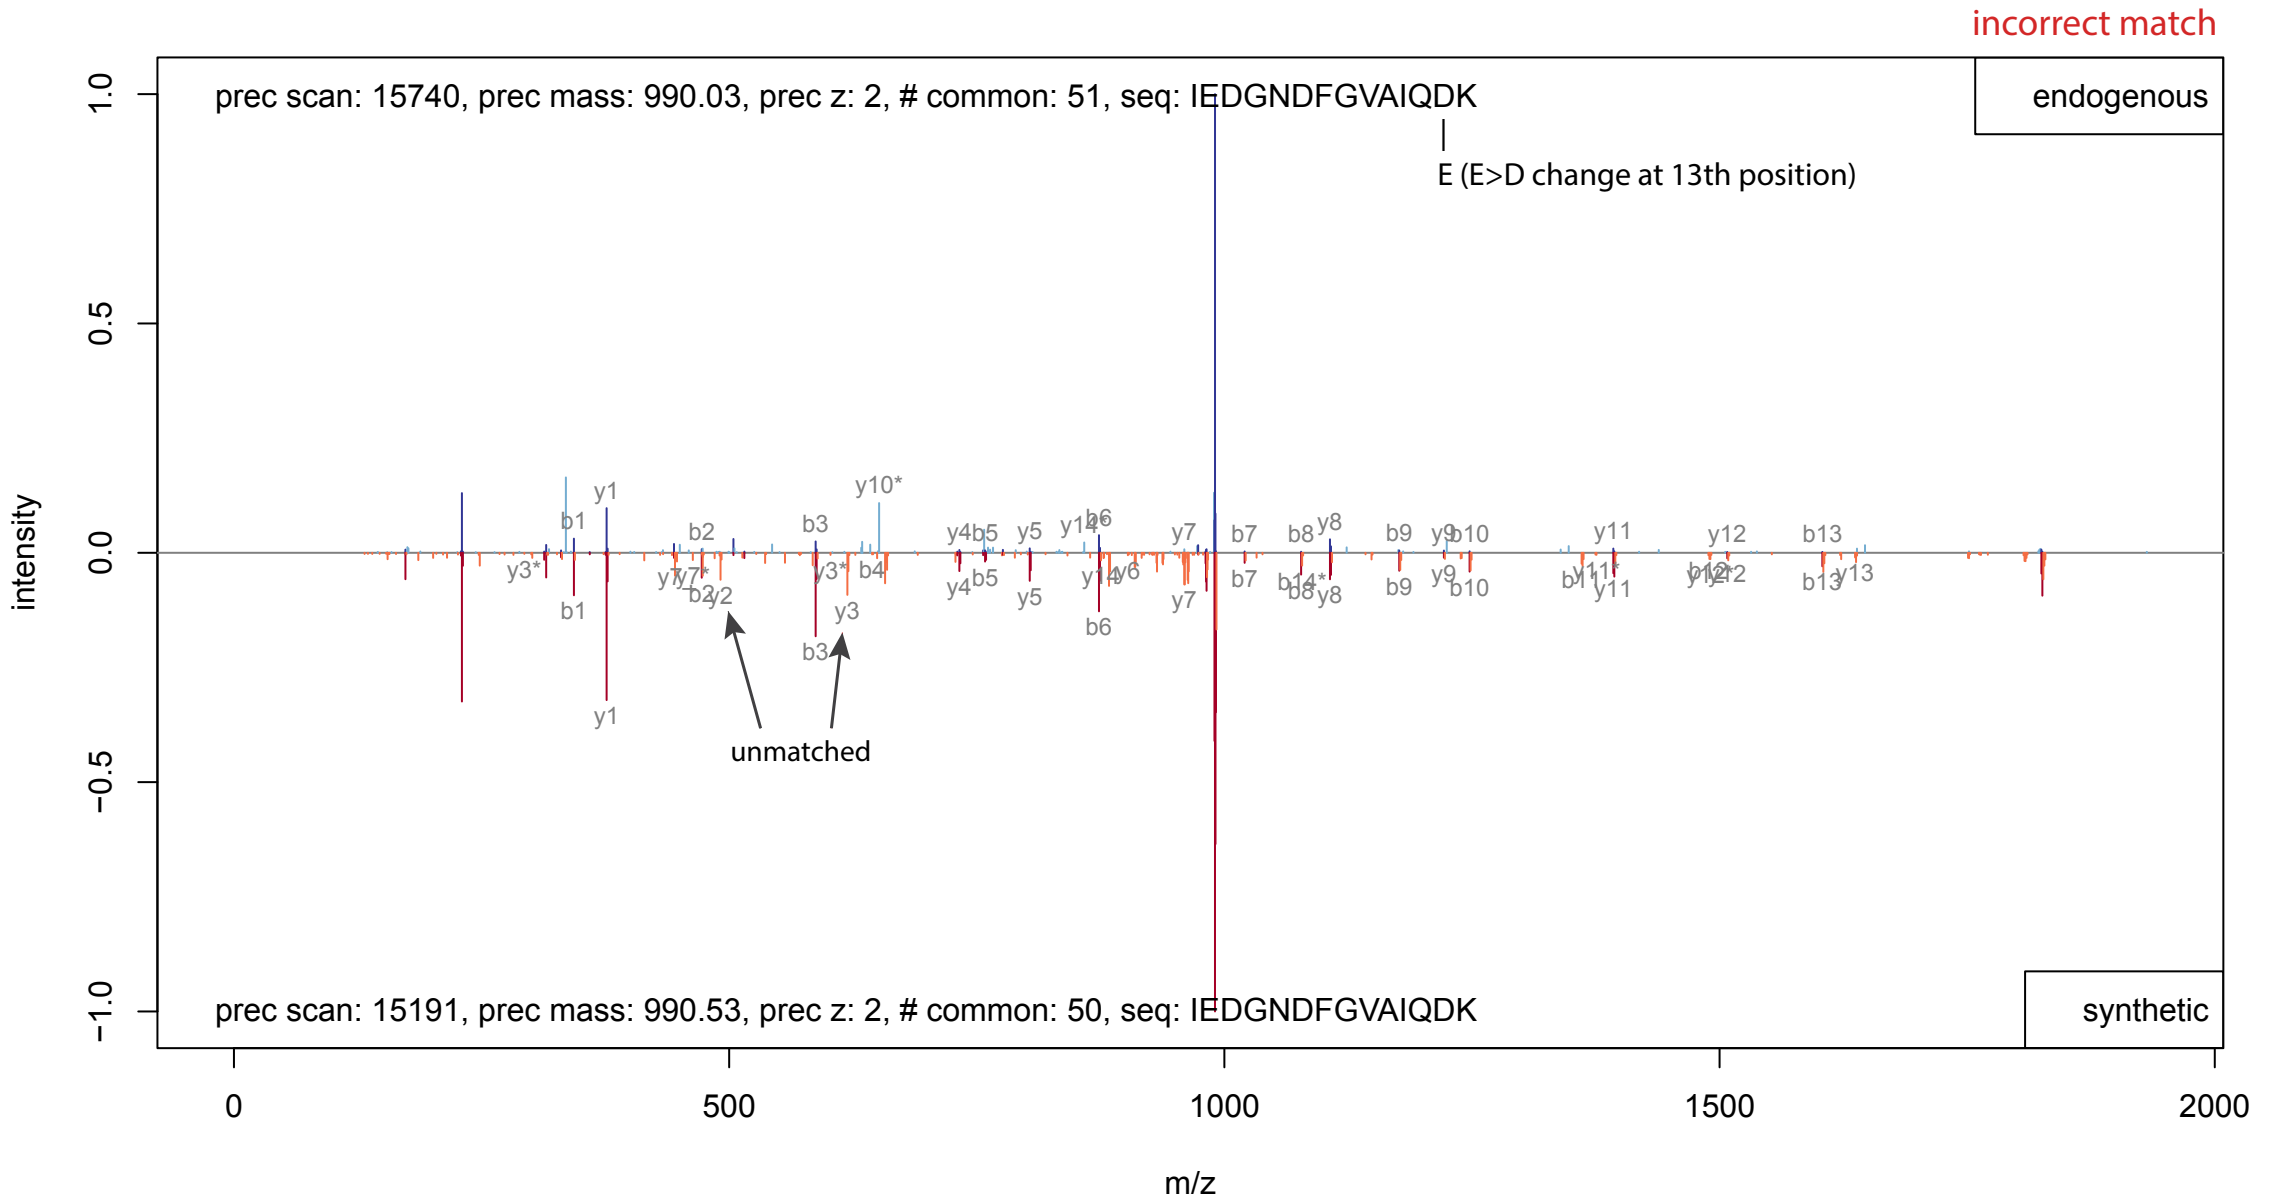

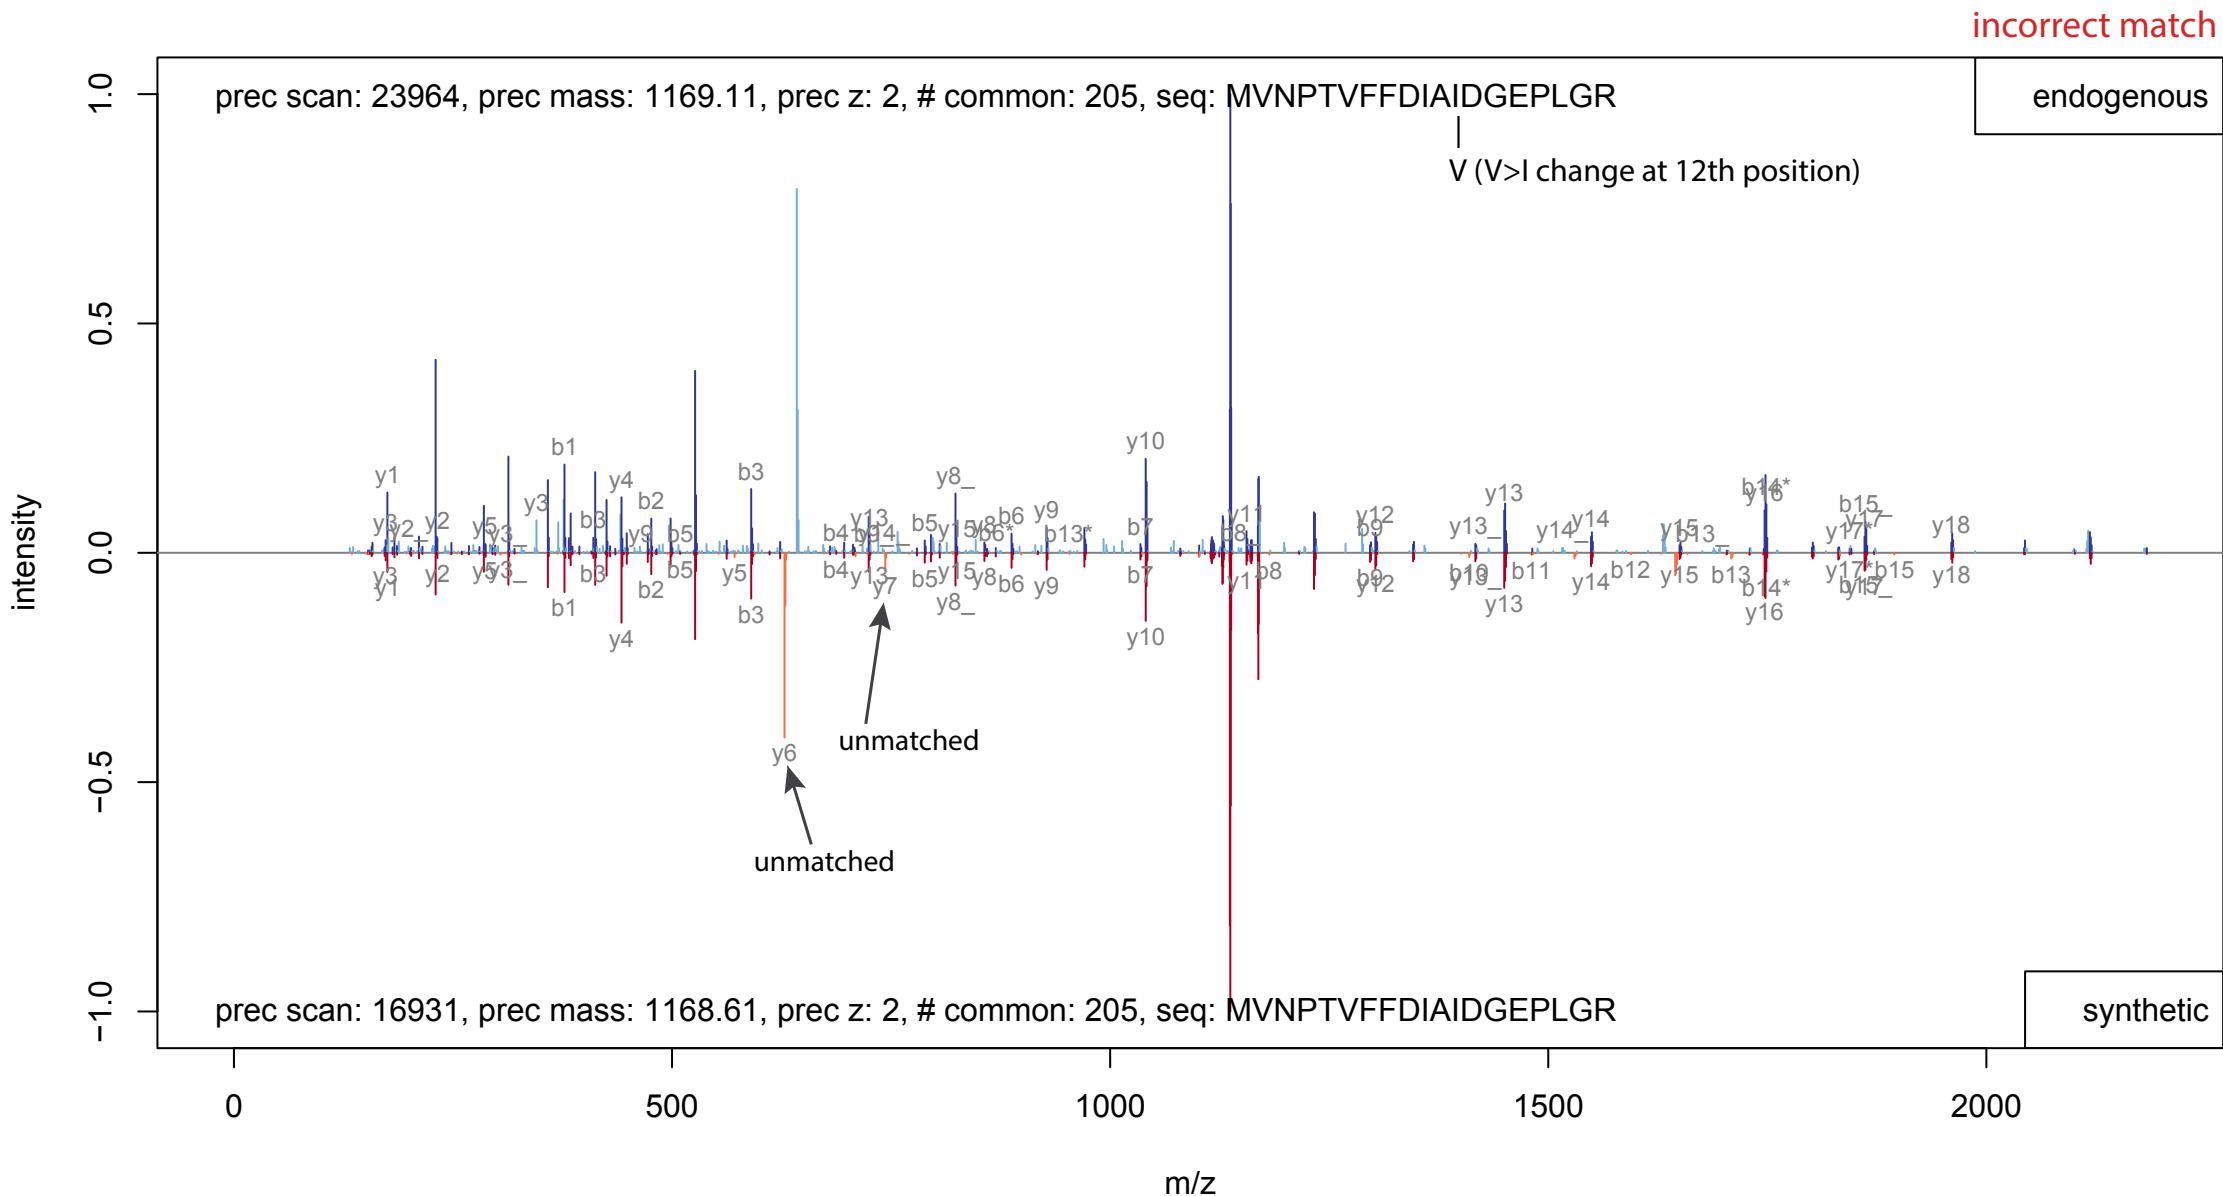





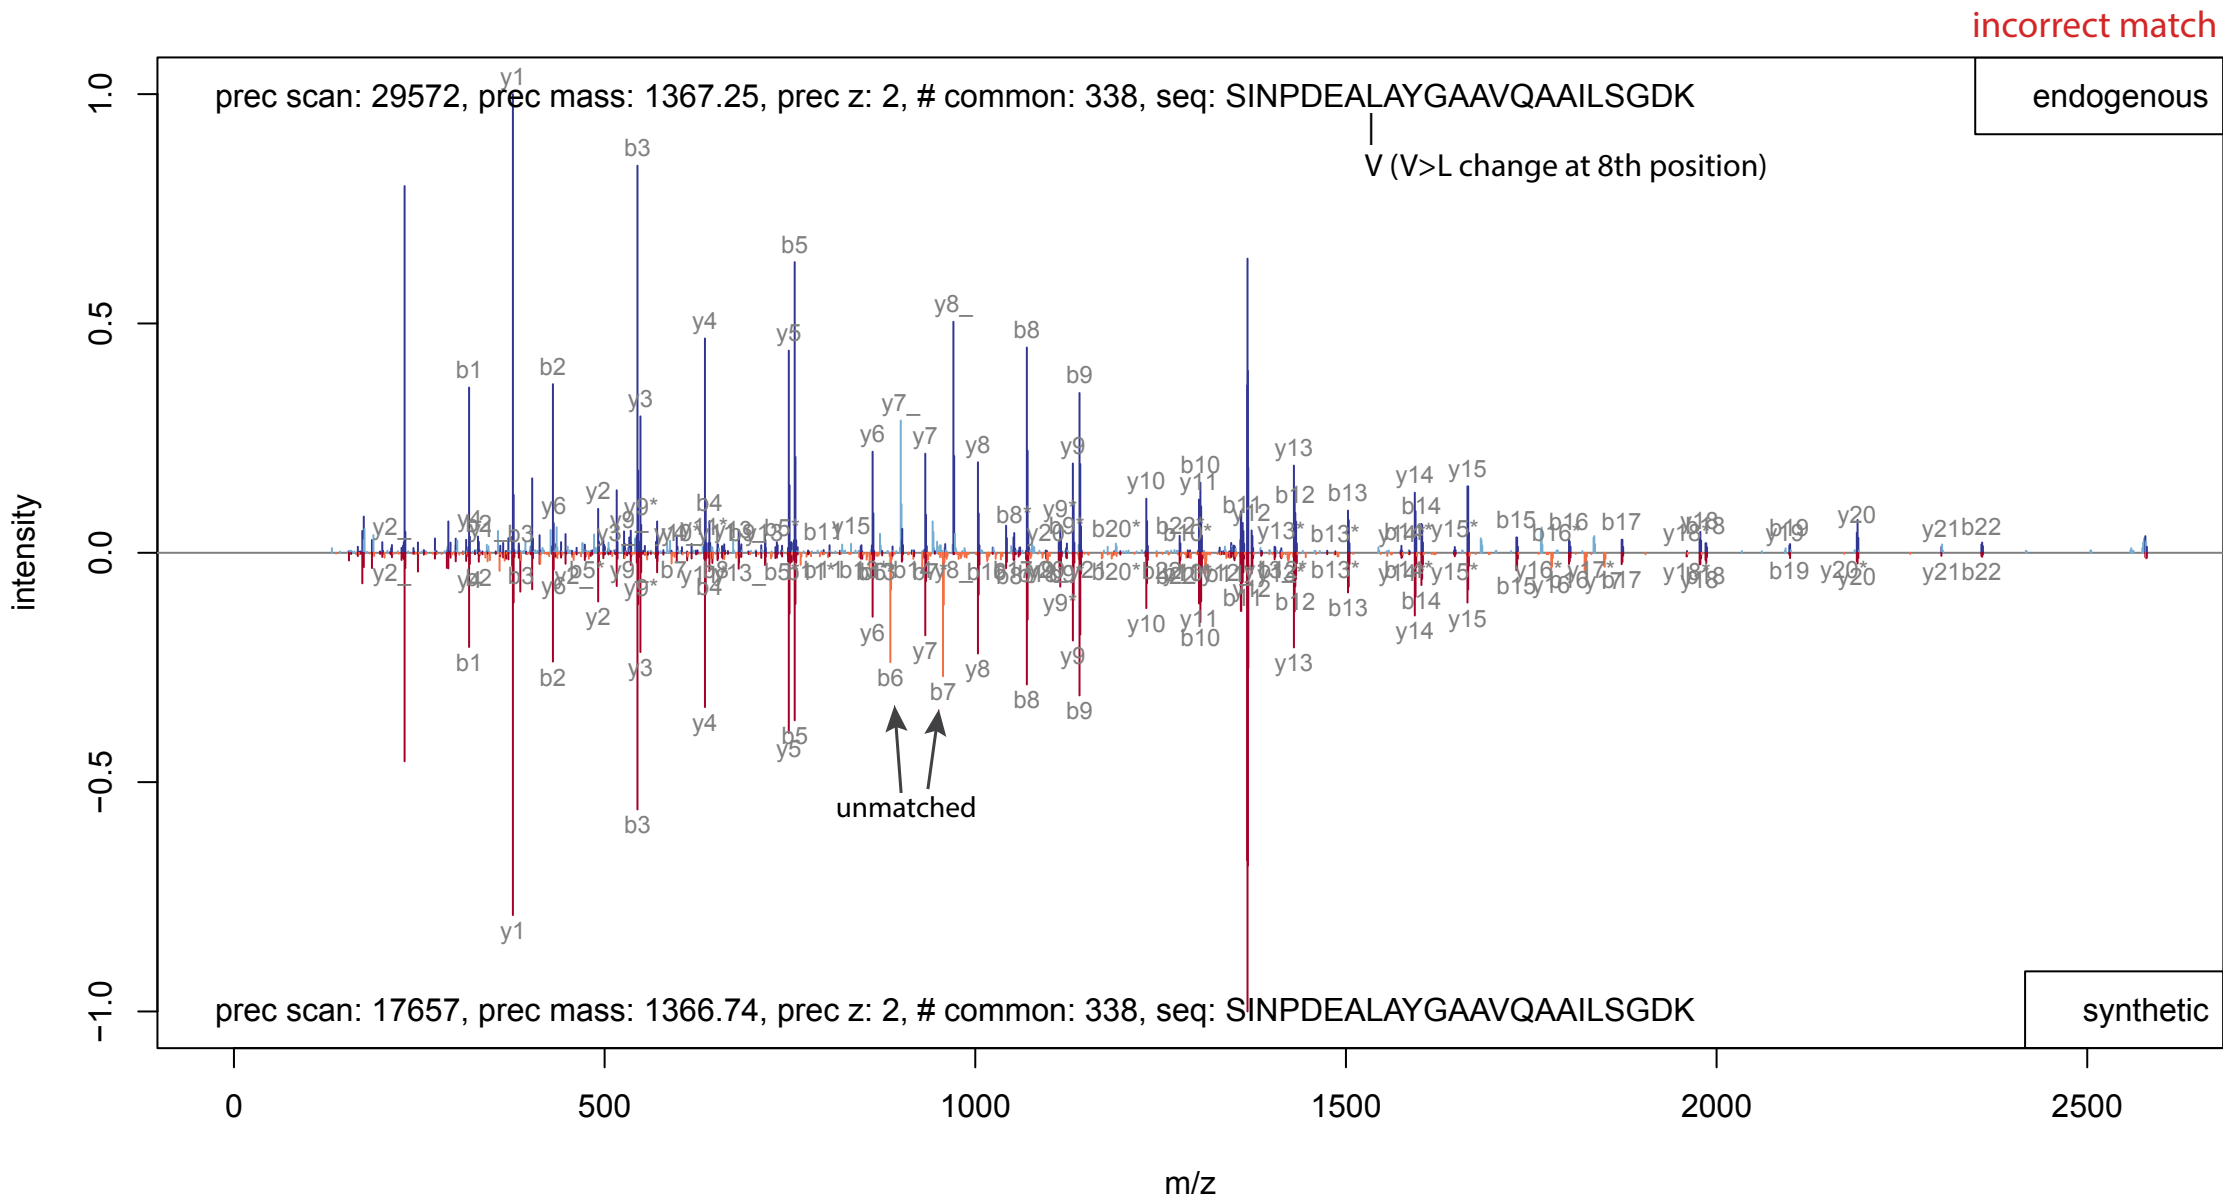

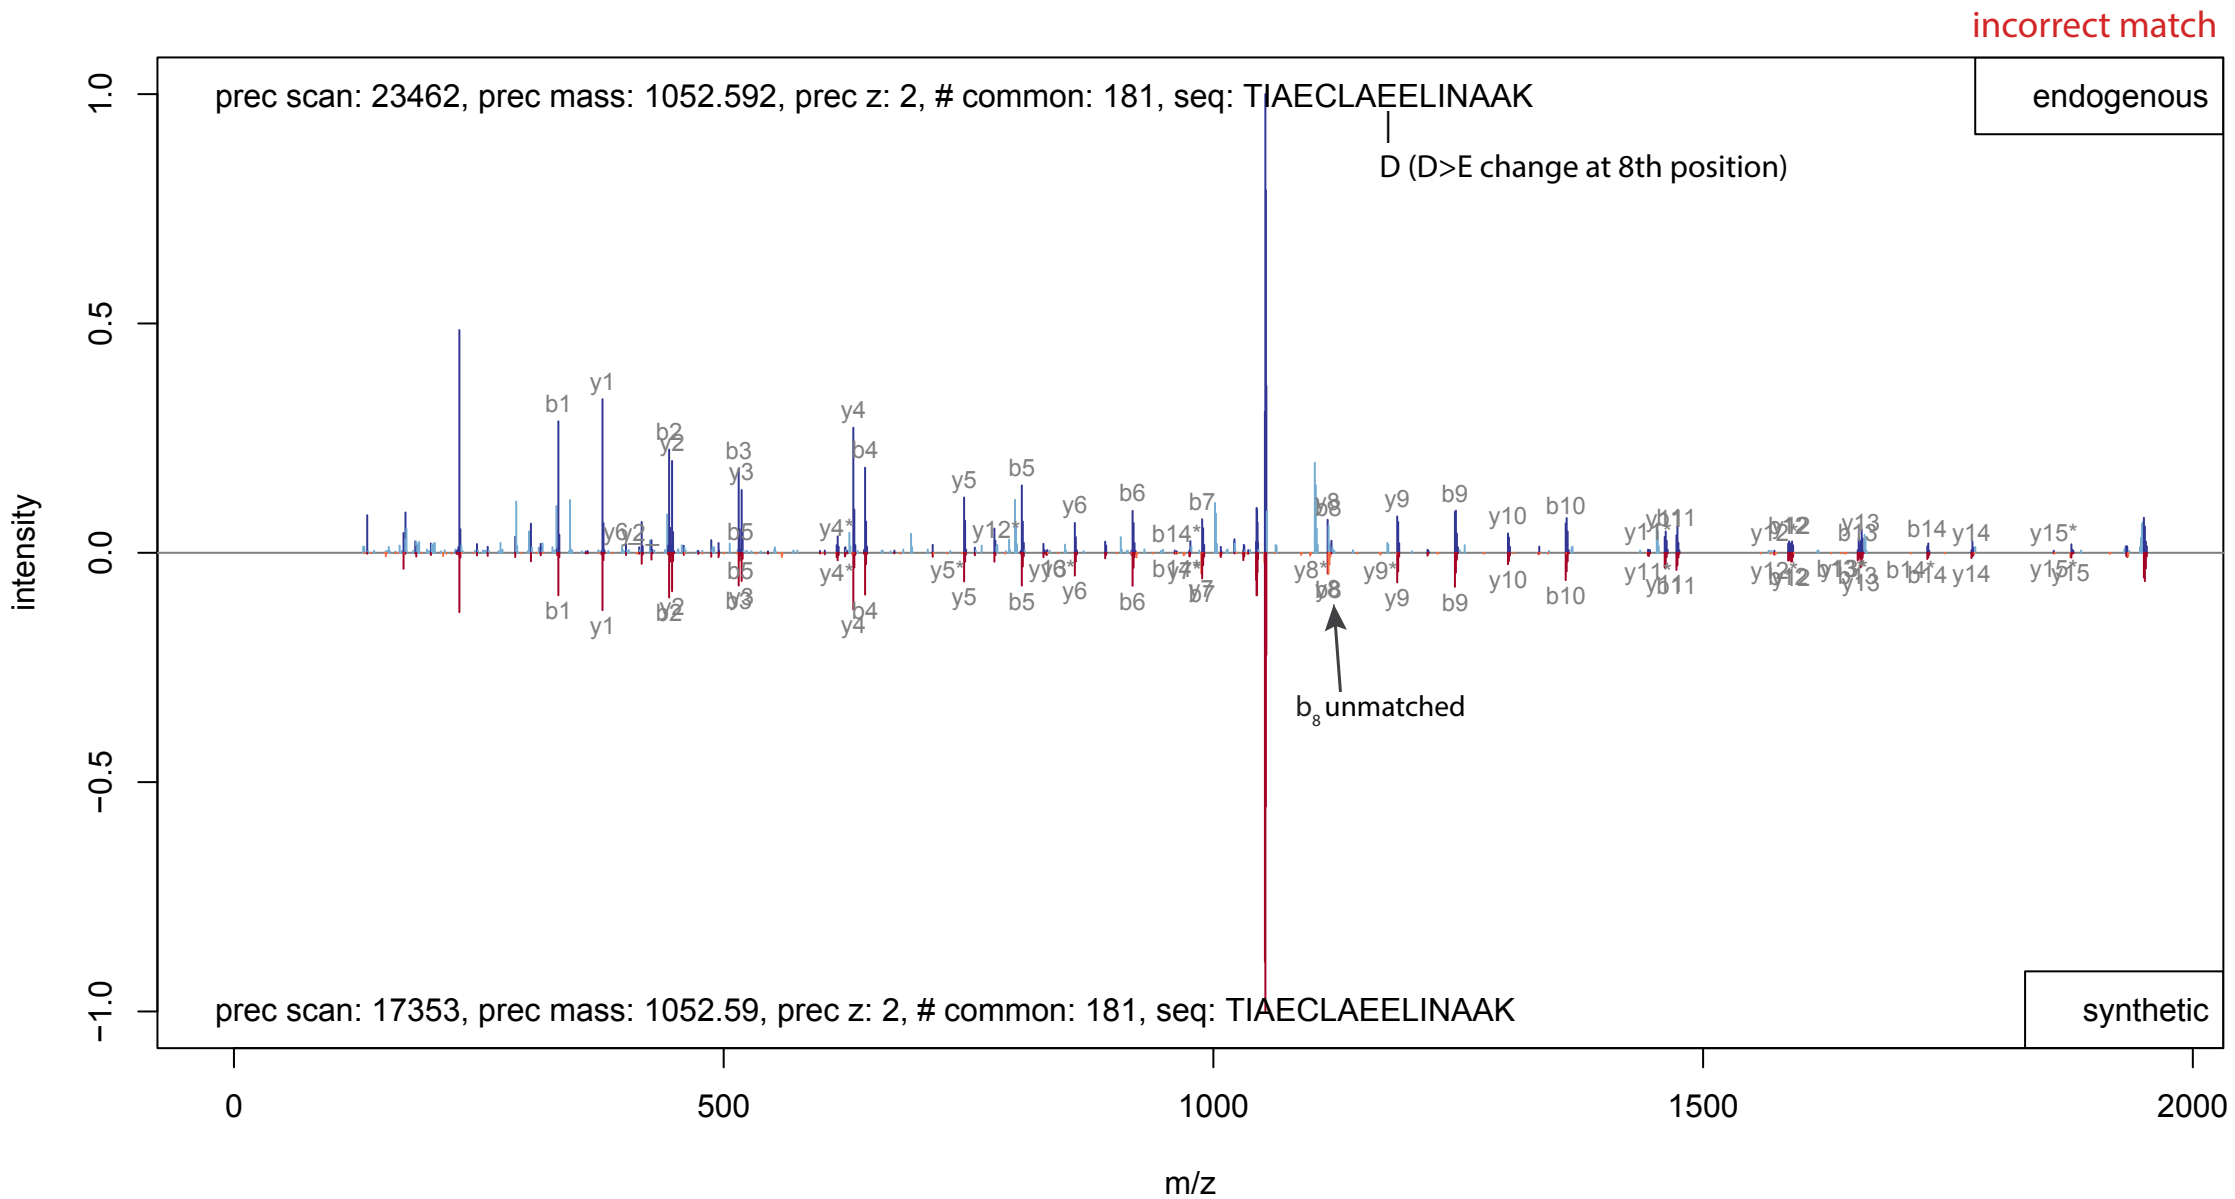

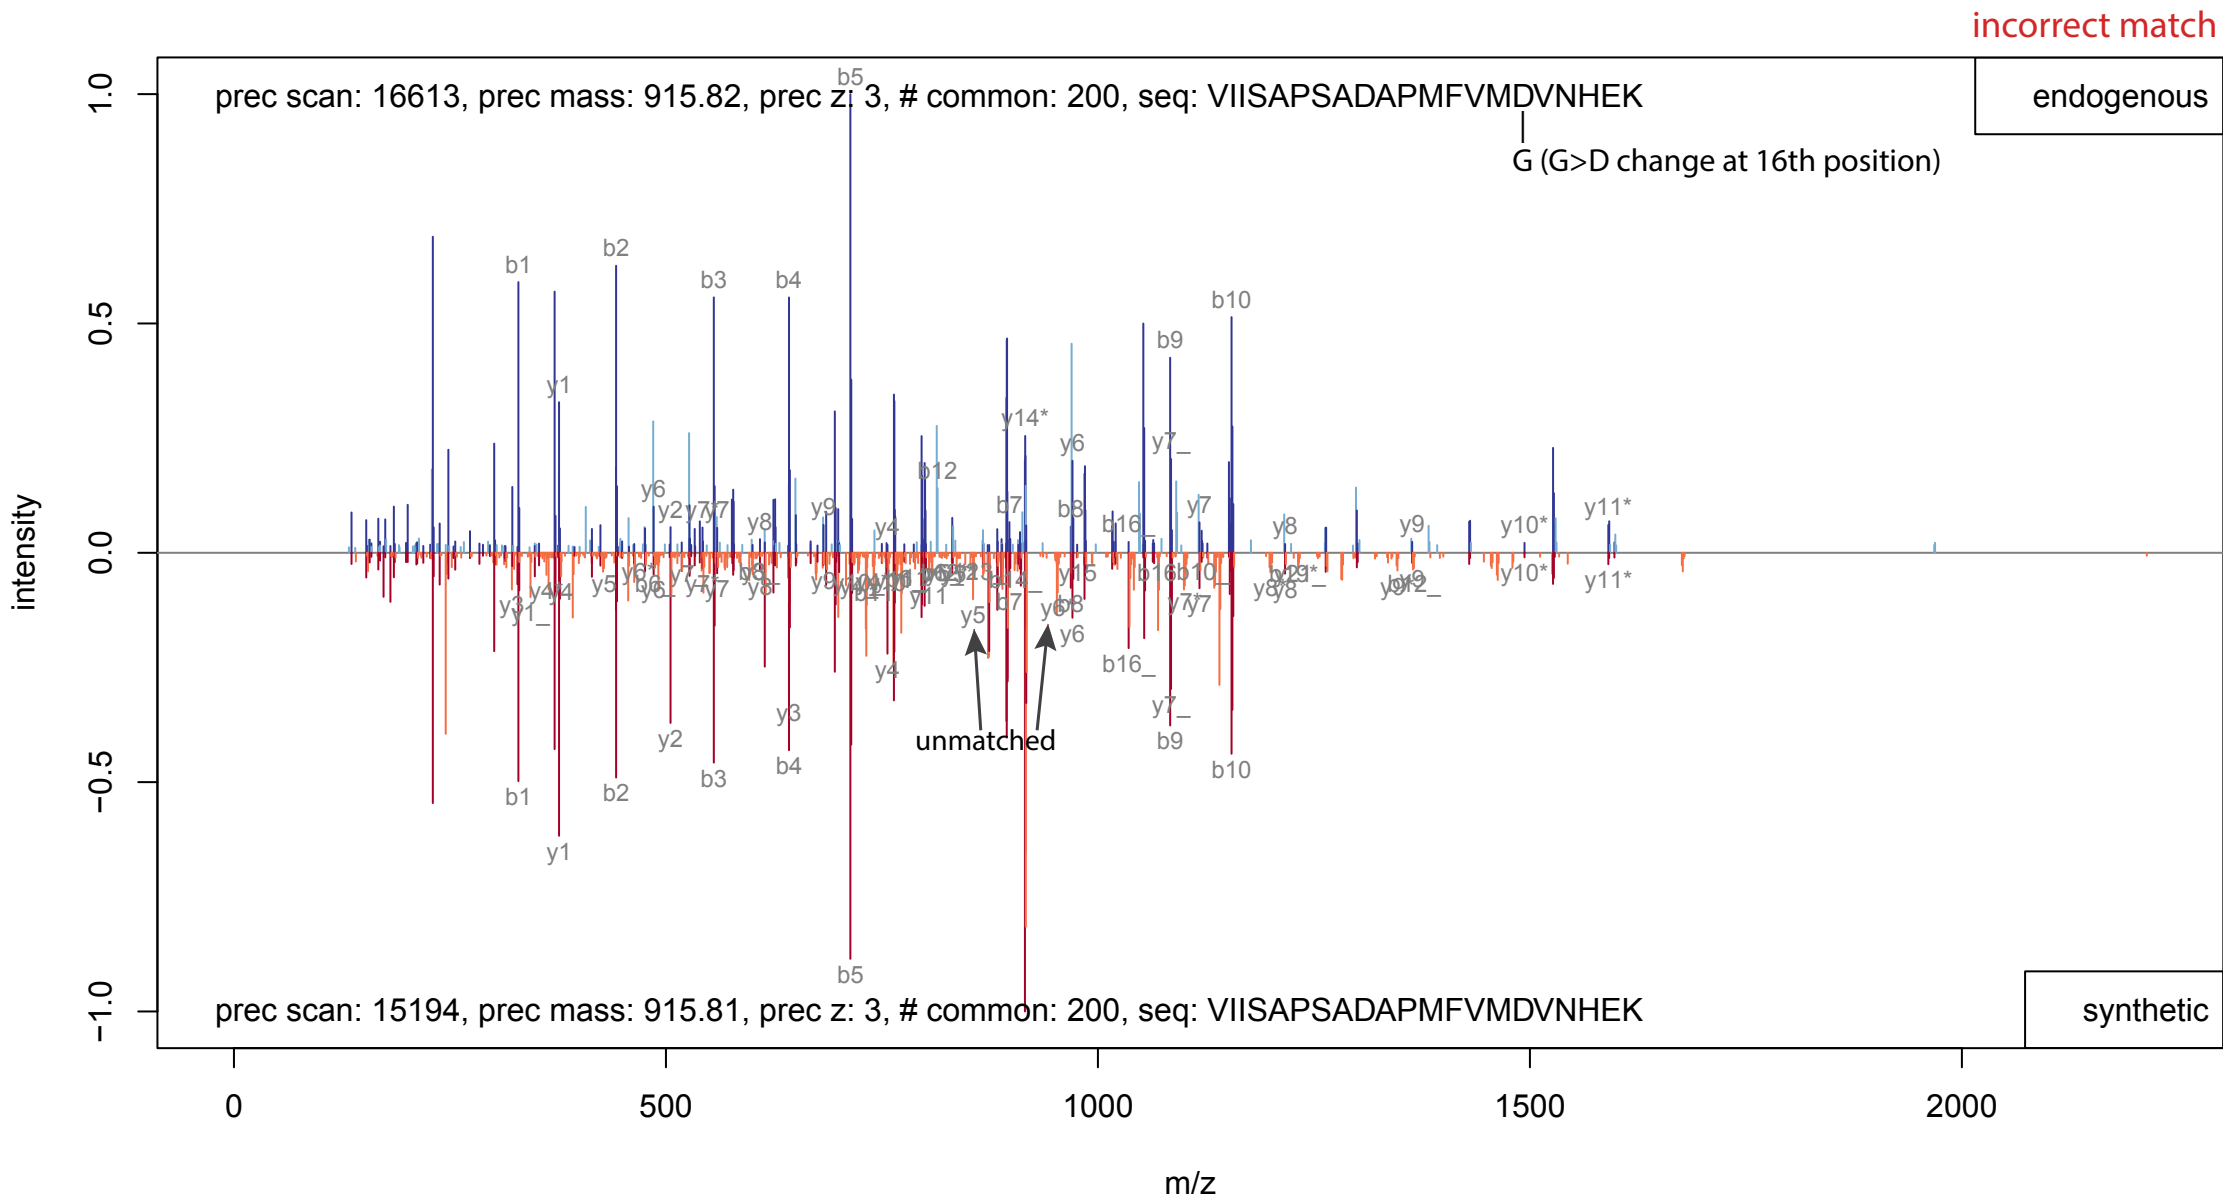

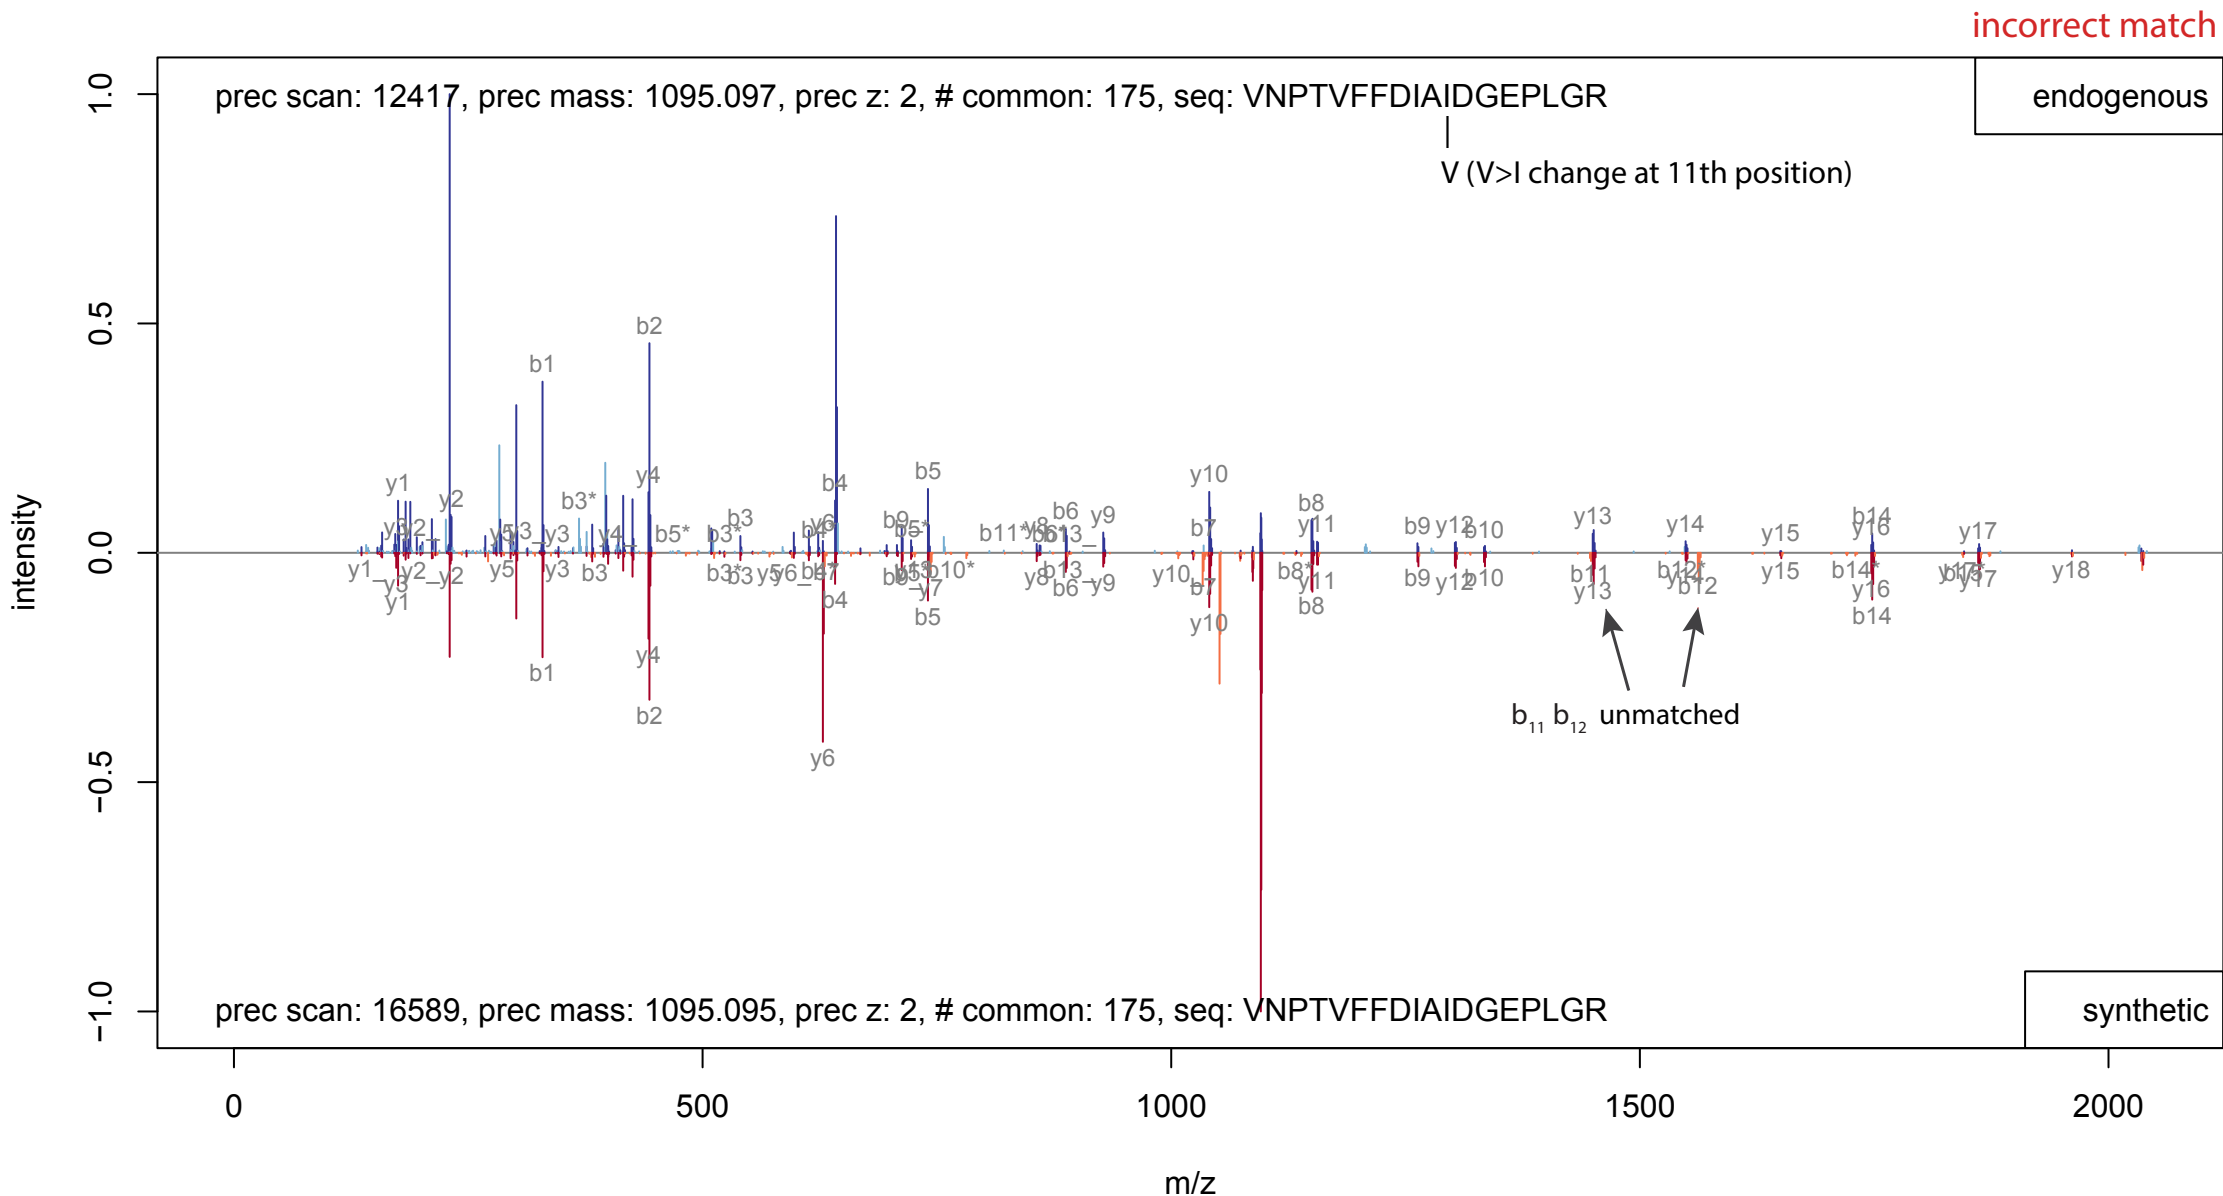

incorrect match

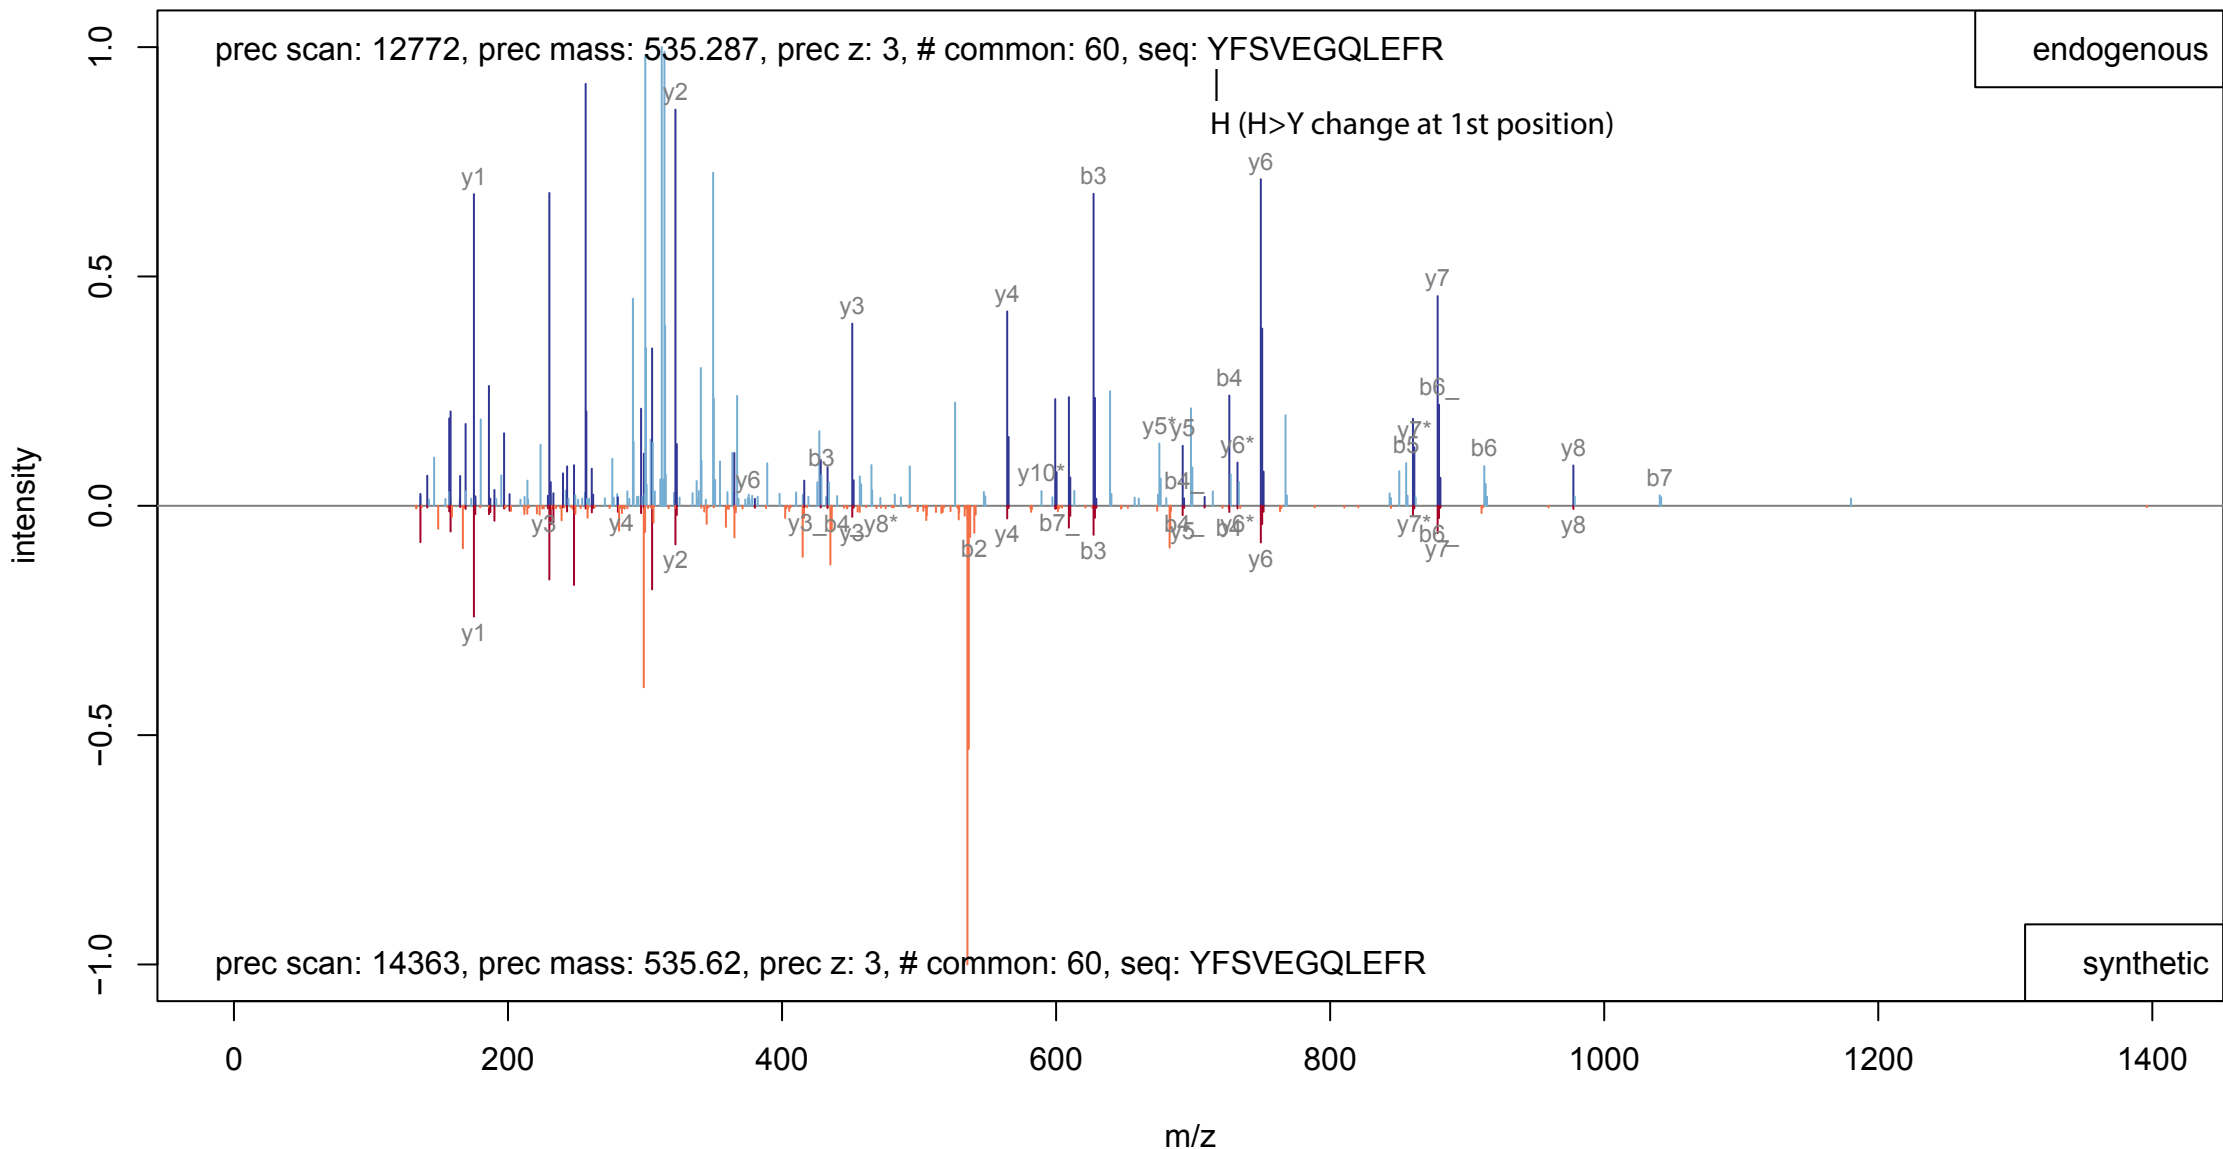

Incorrect match

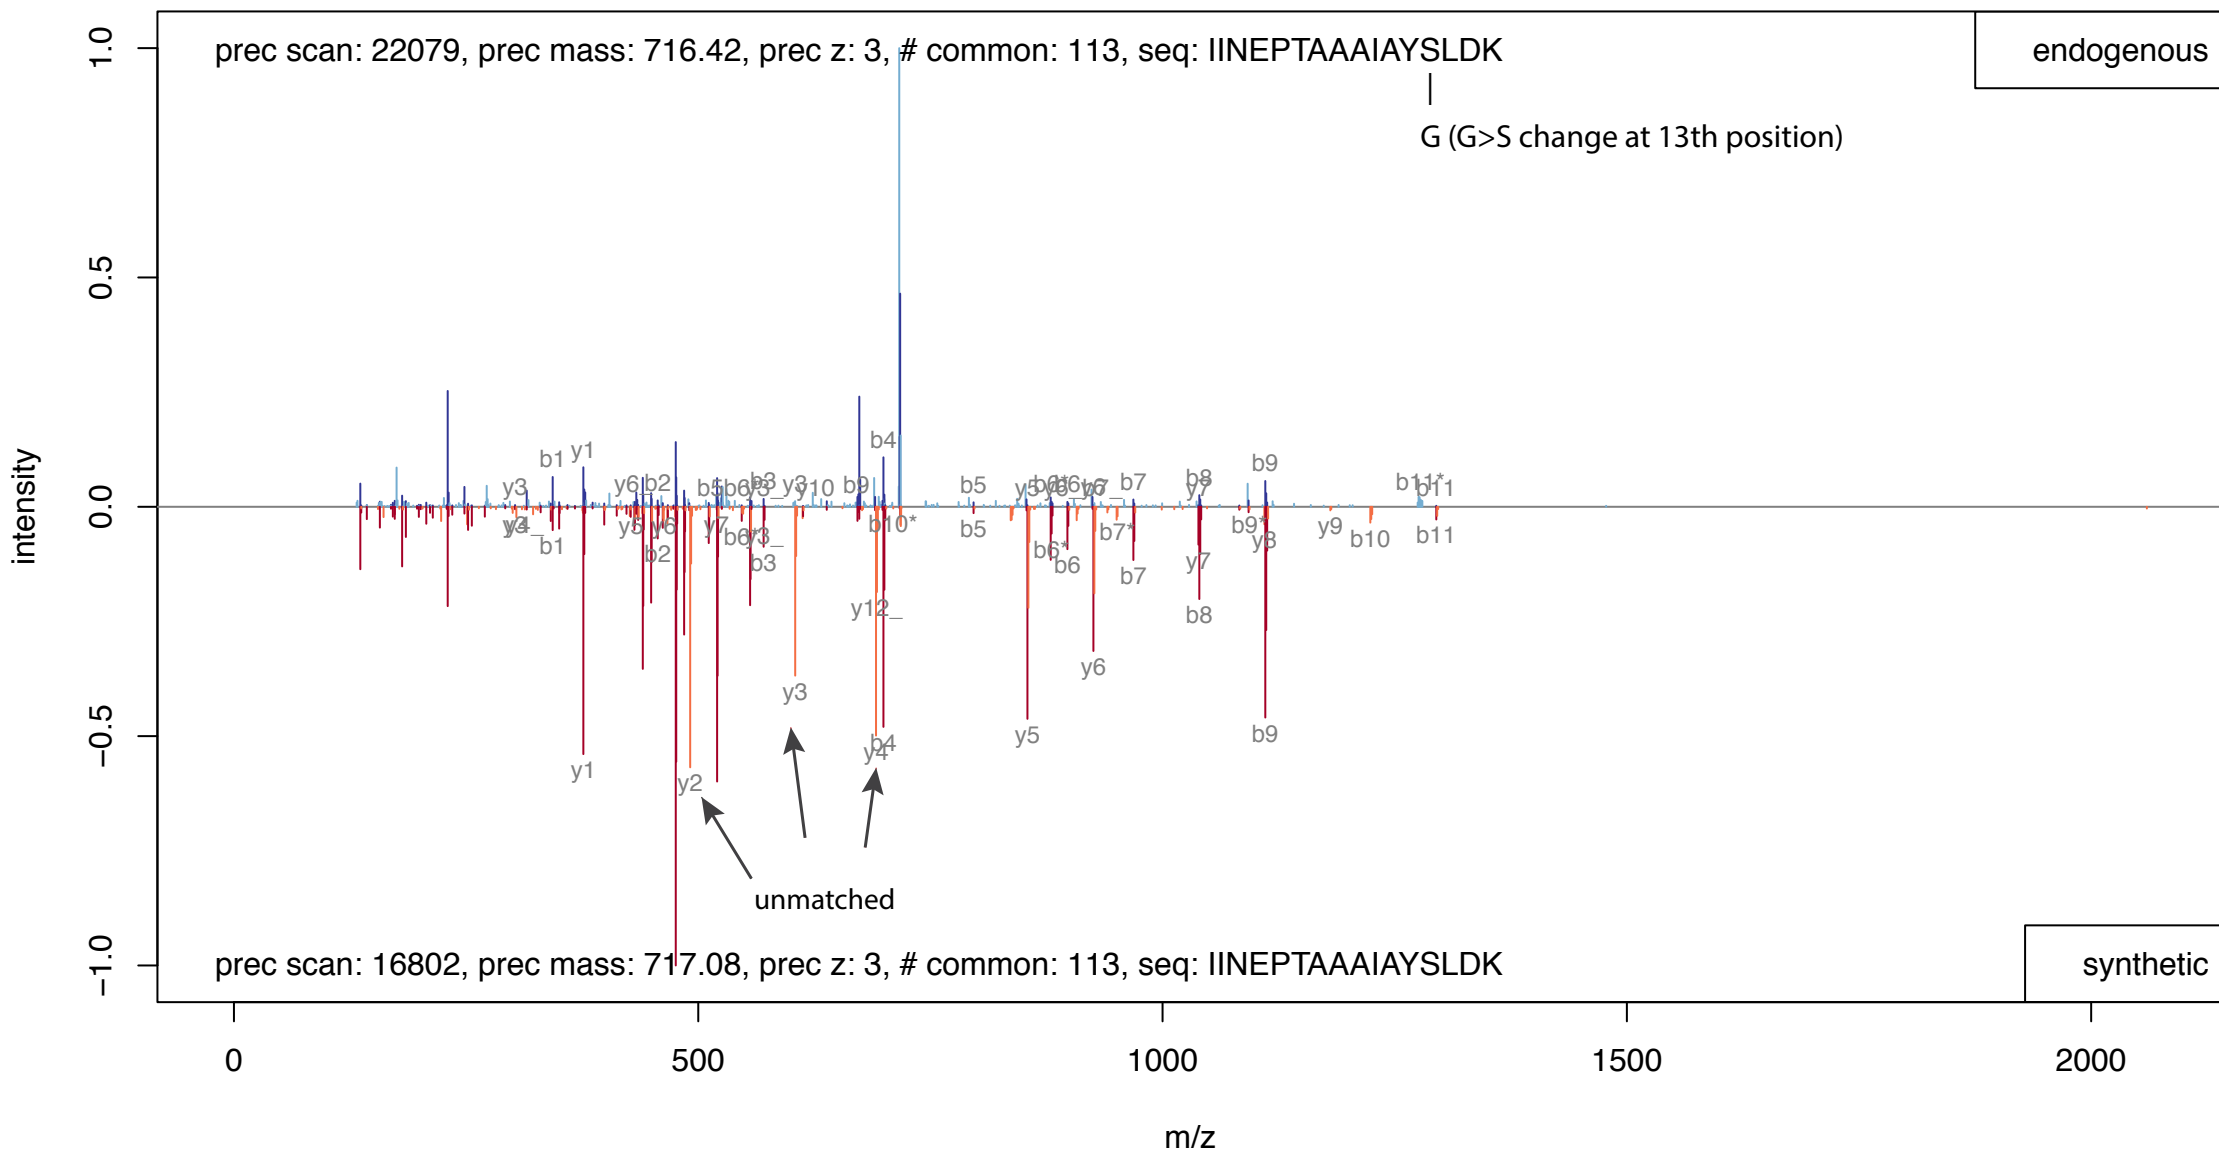

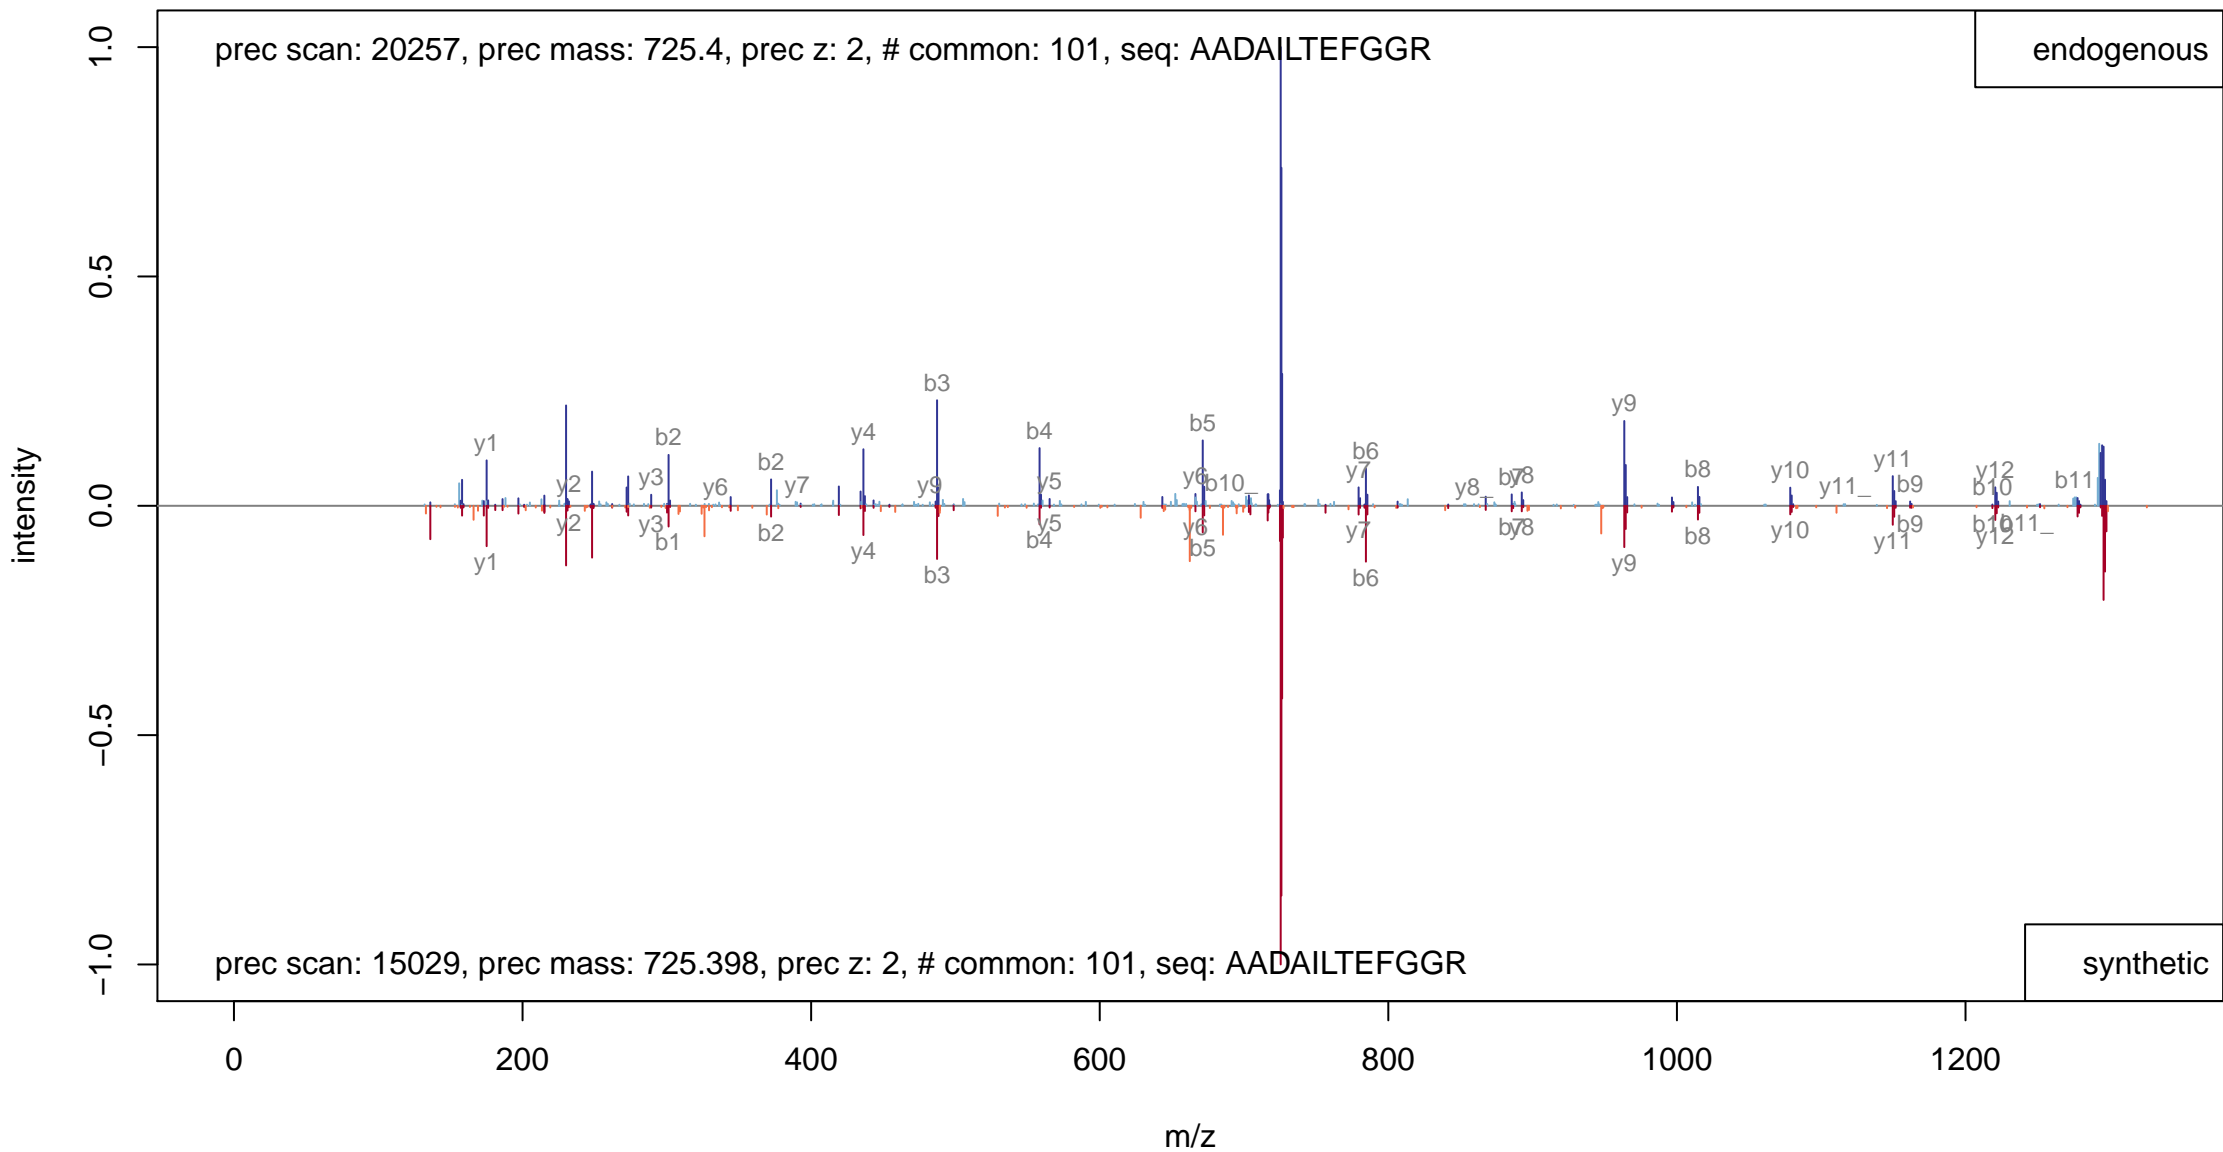

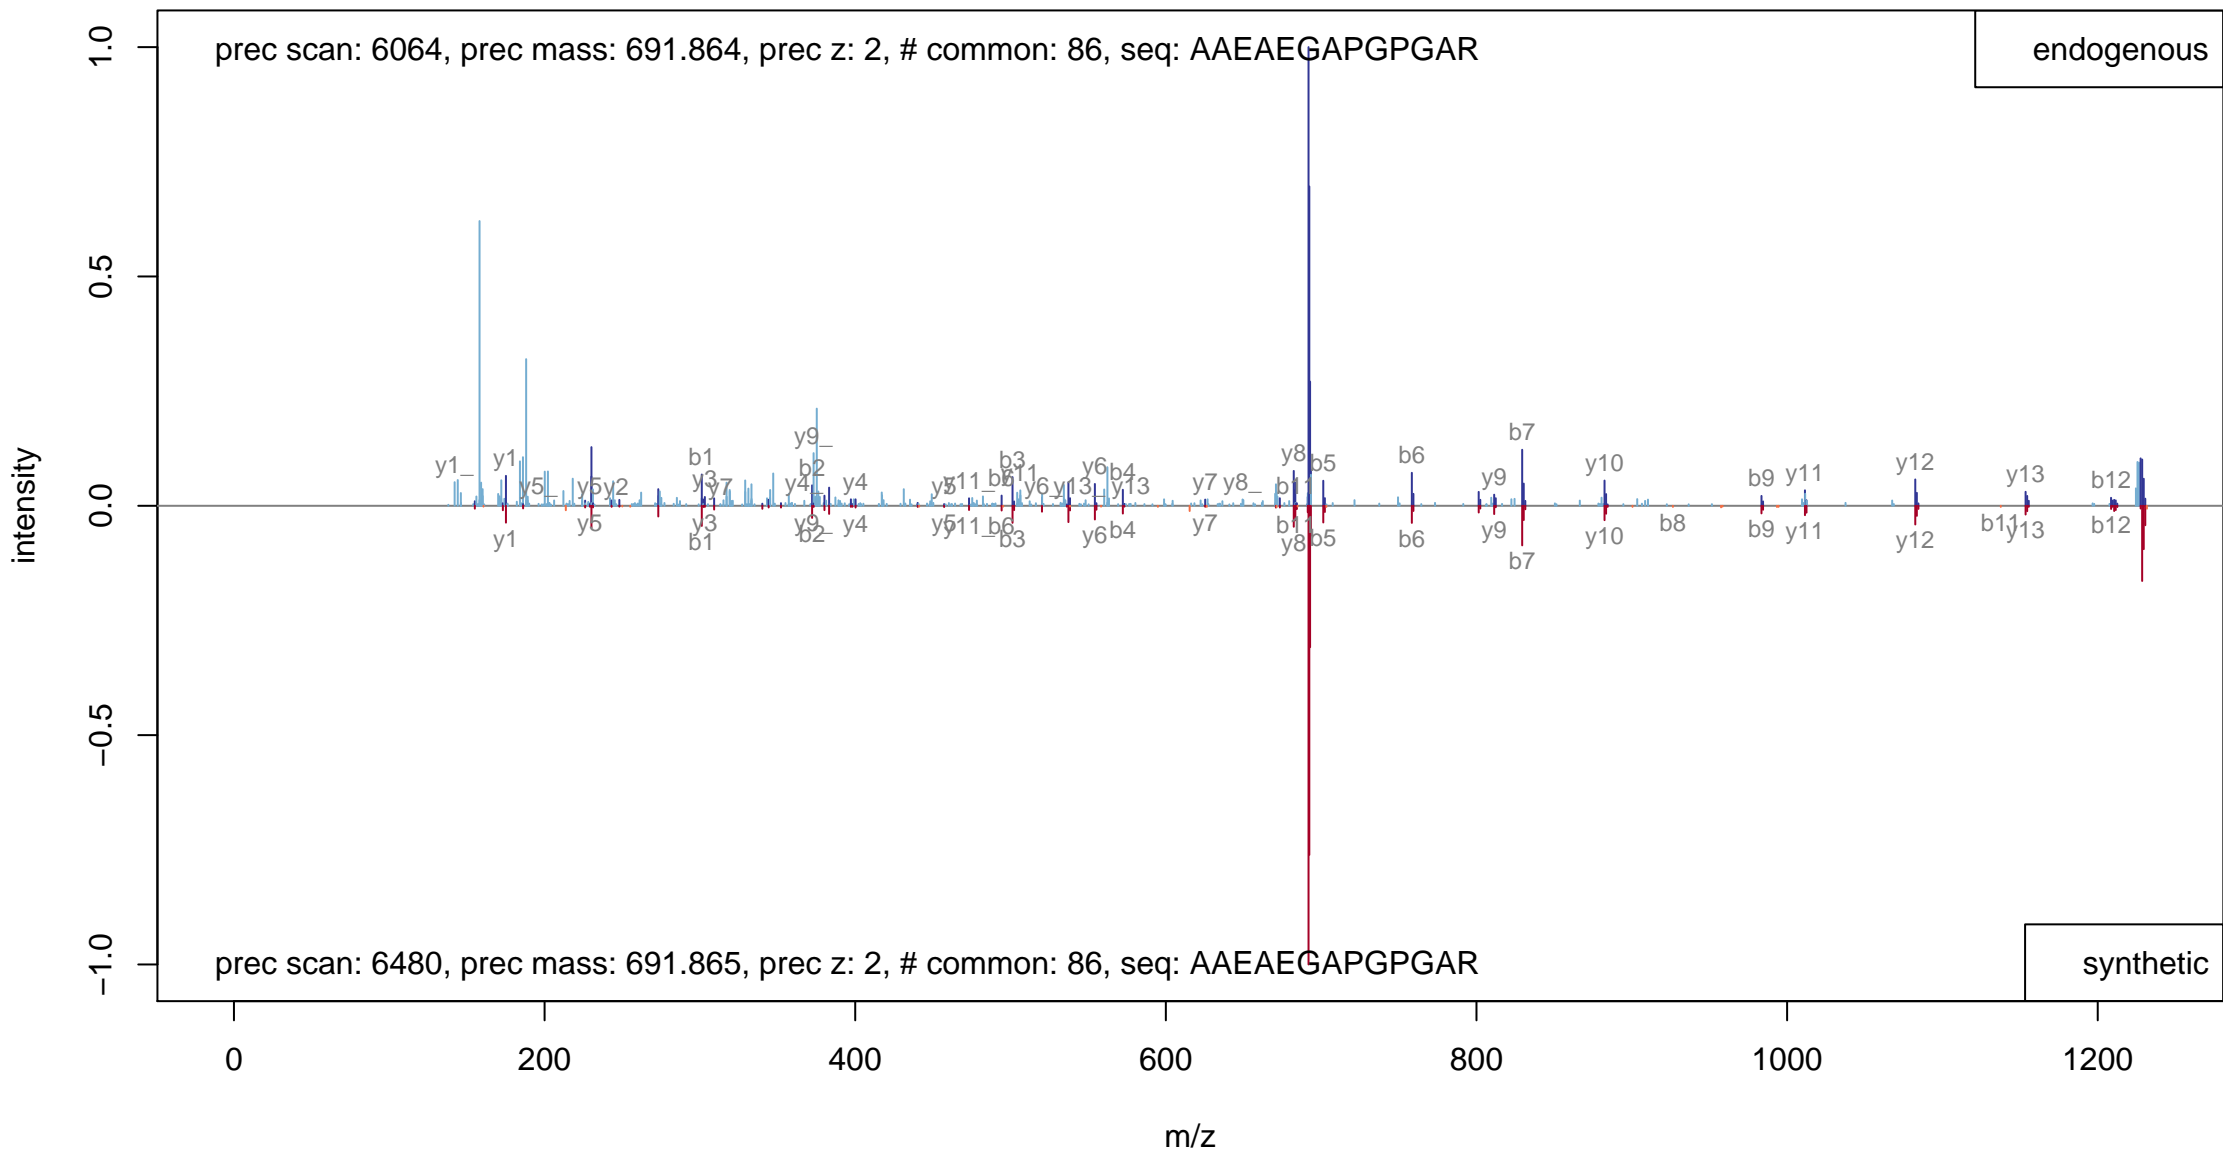



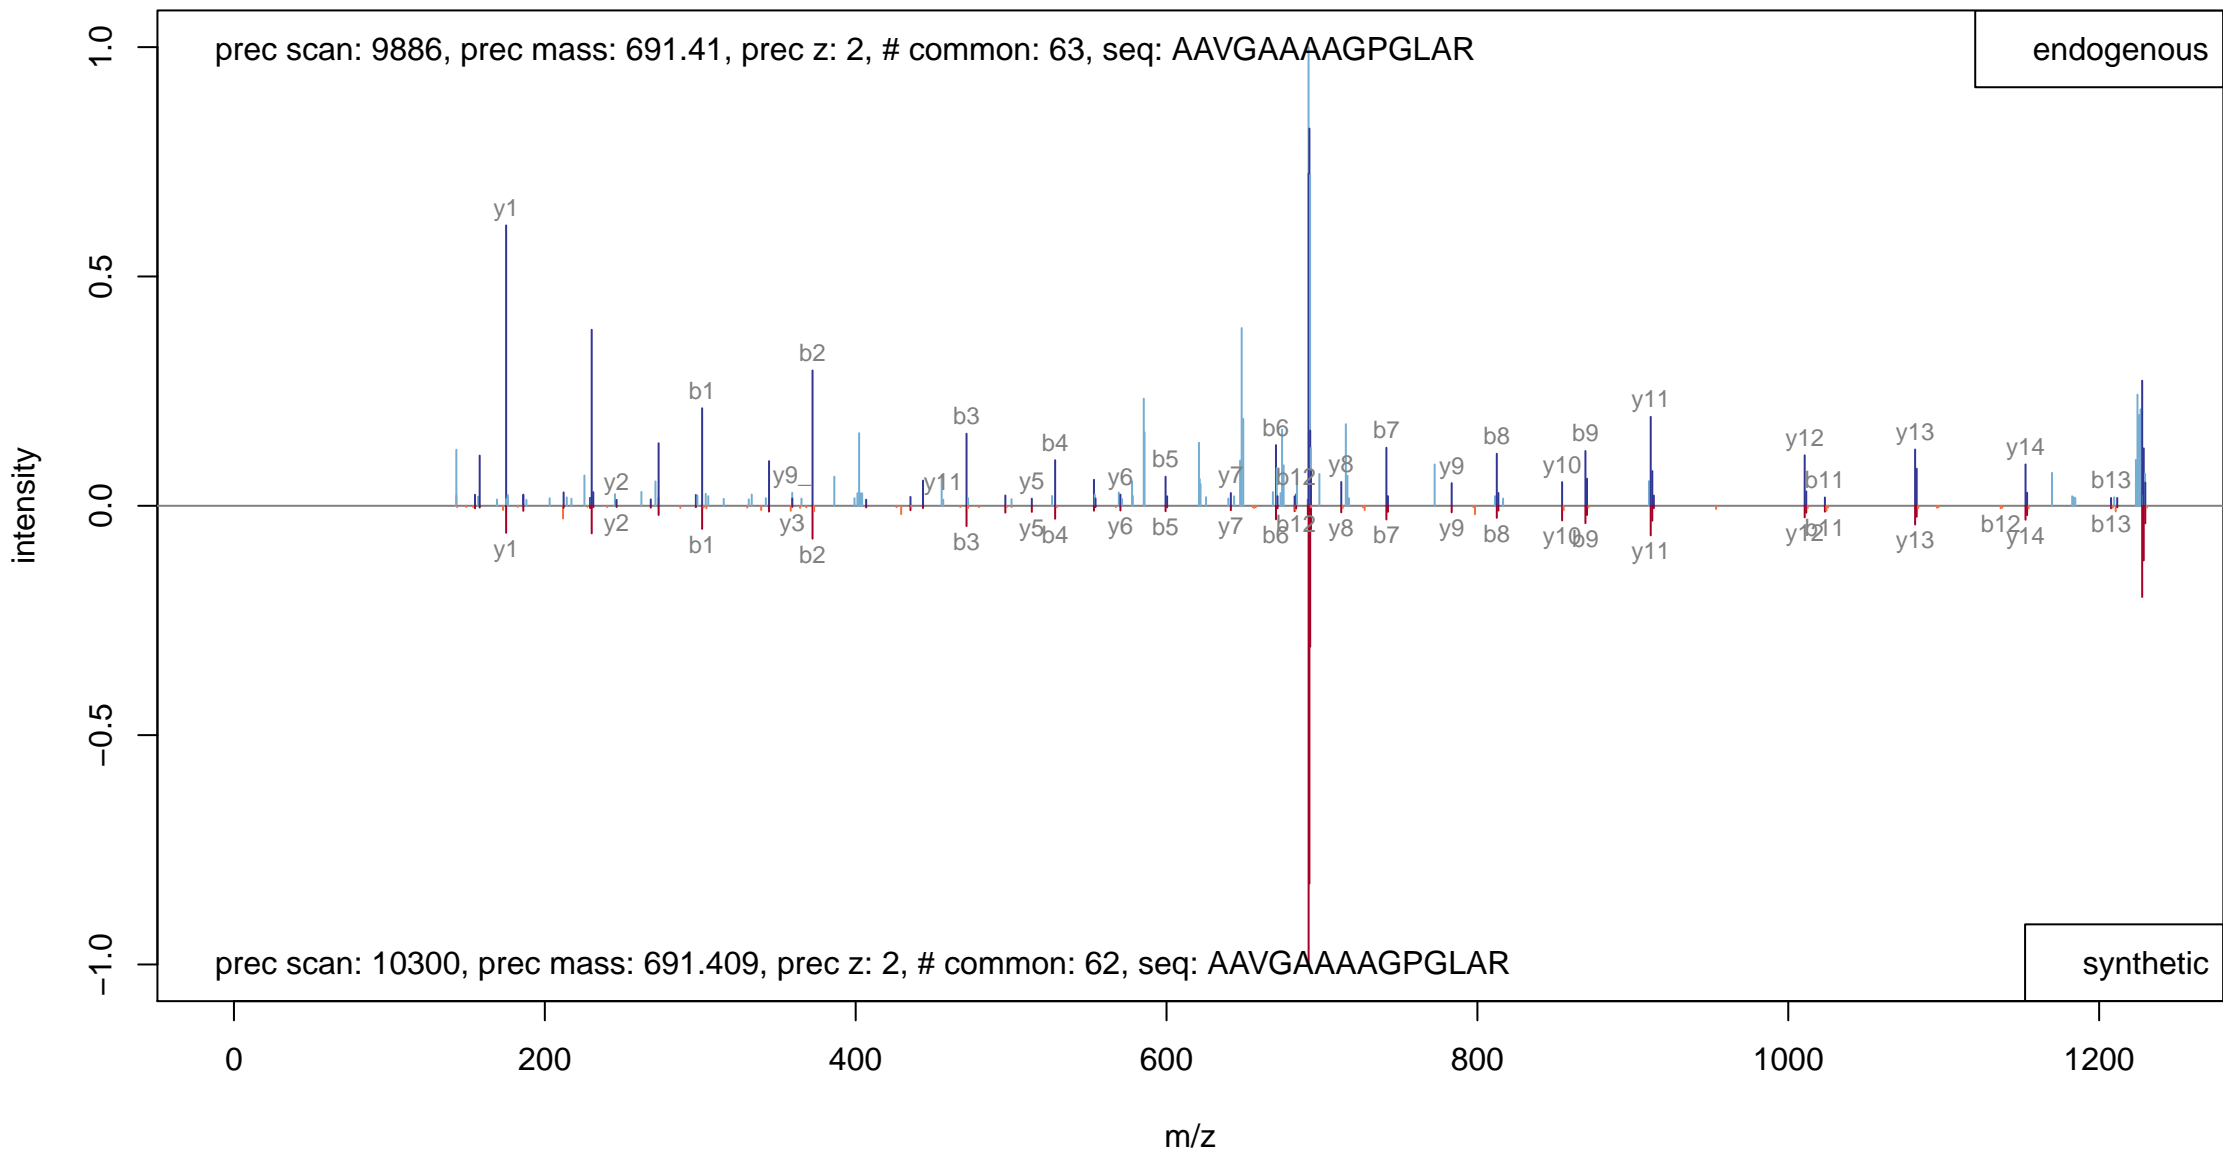

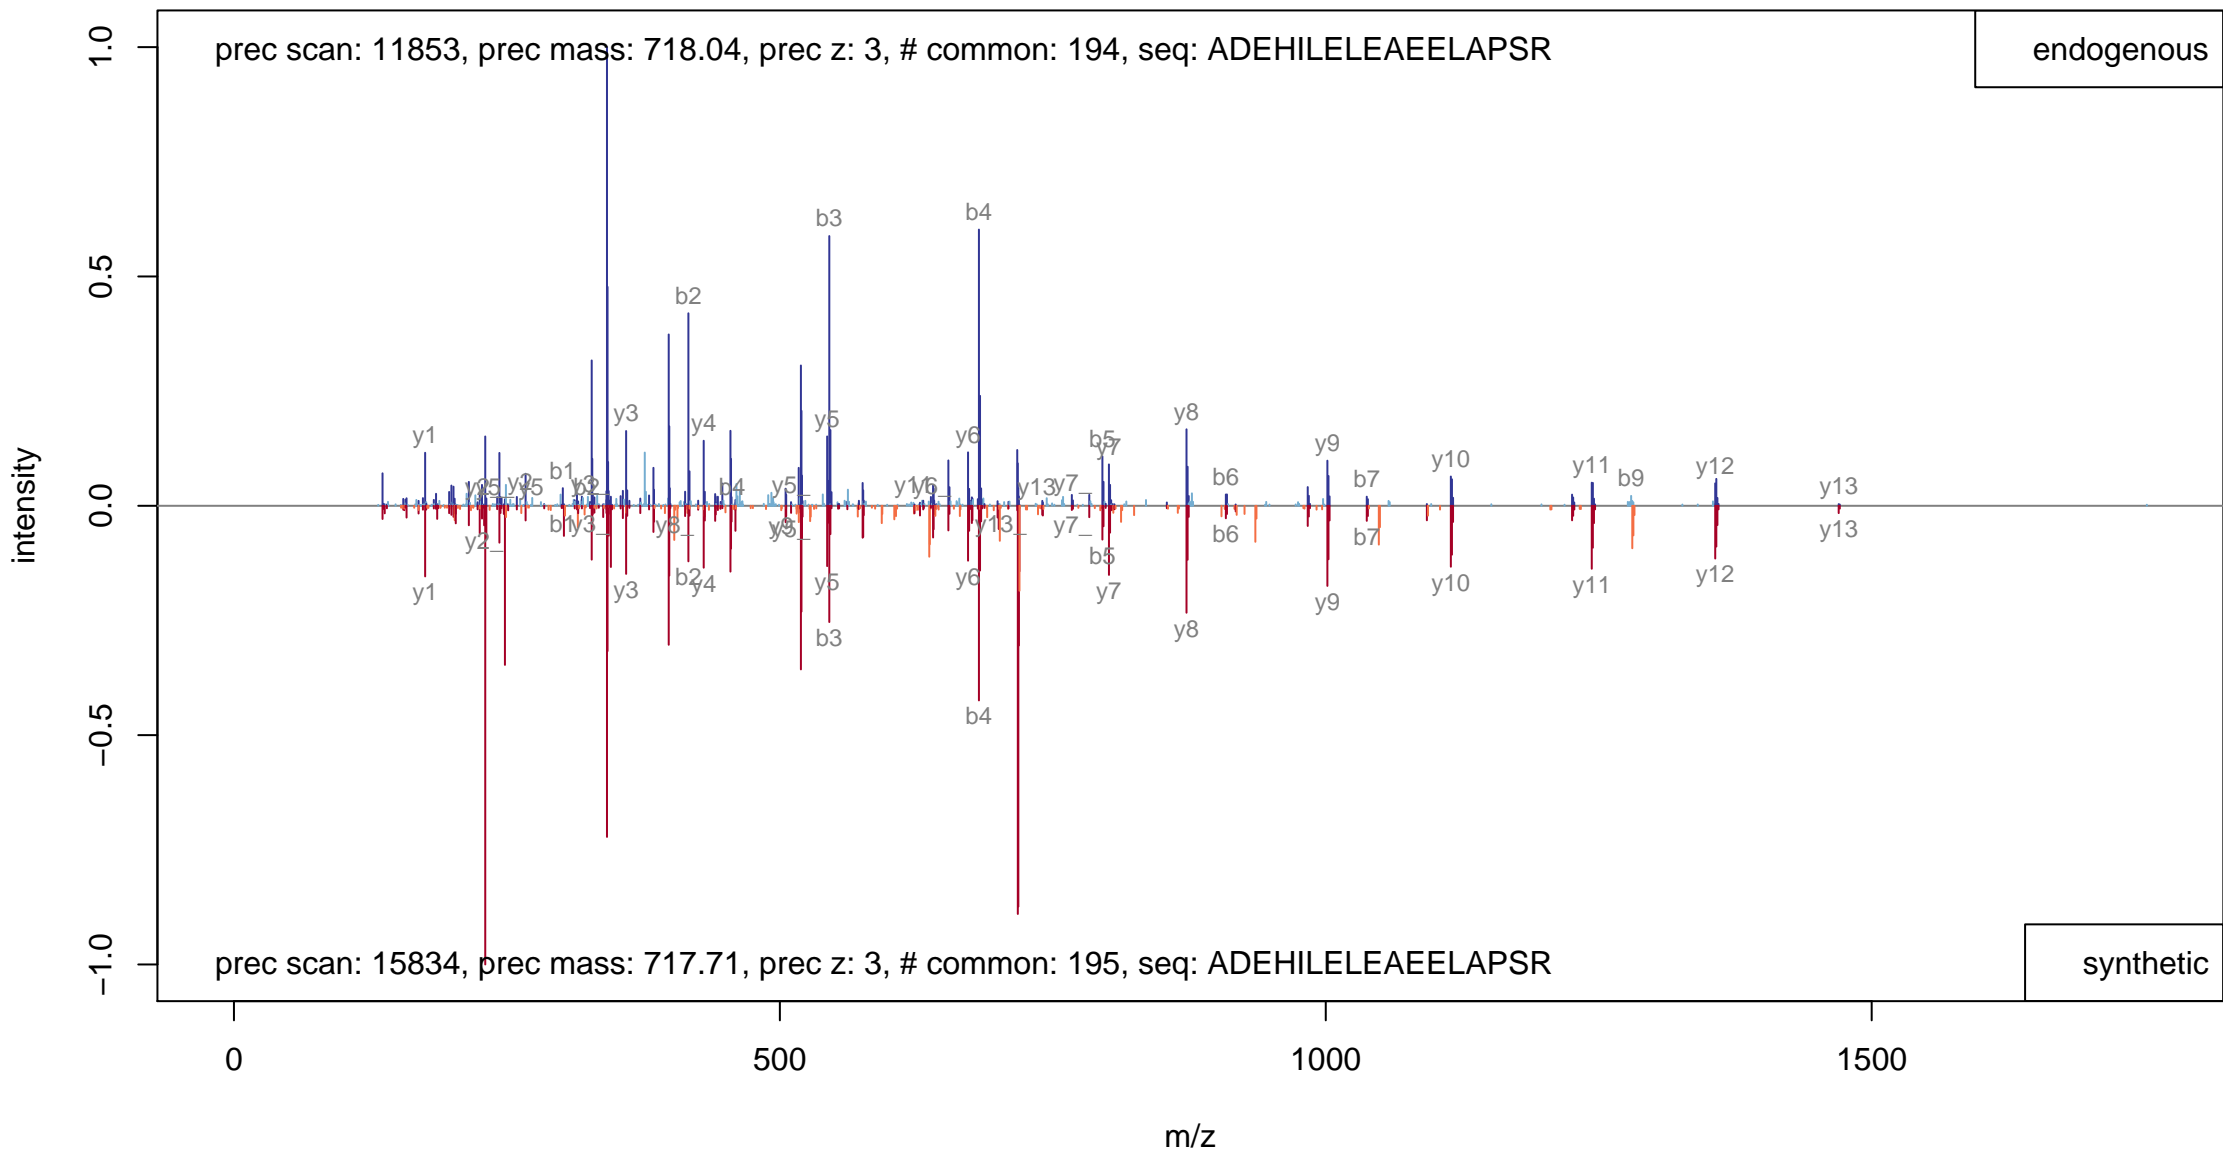

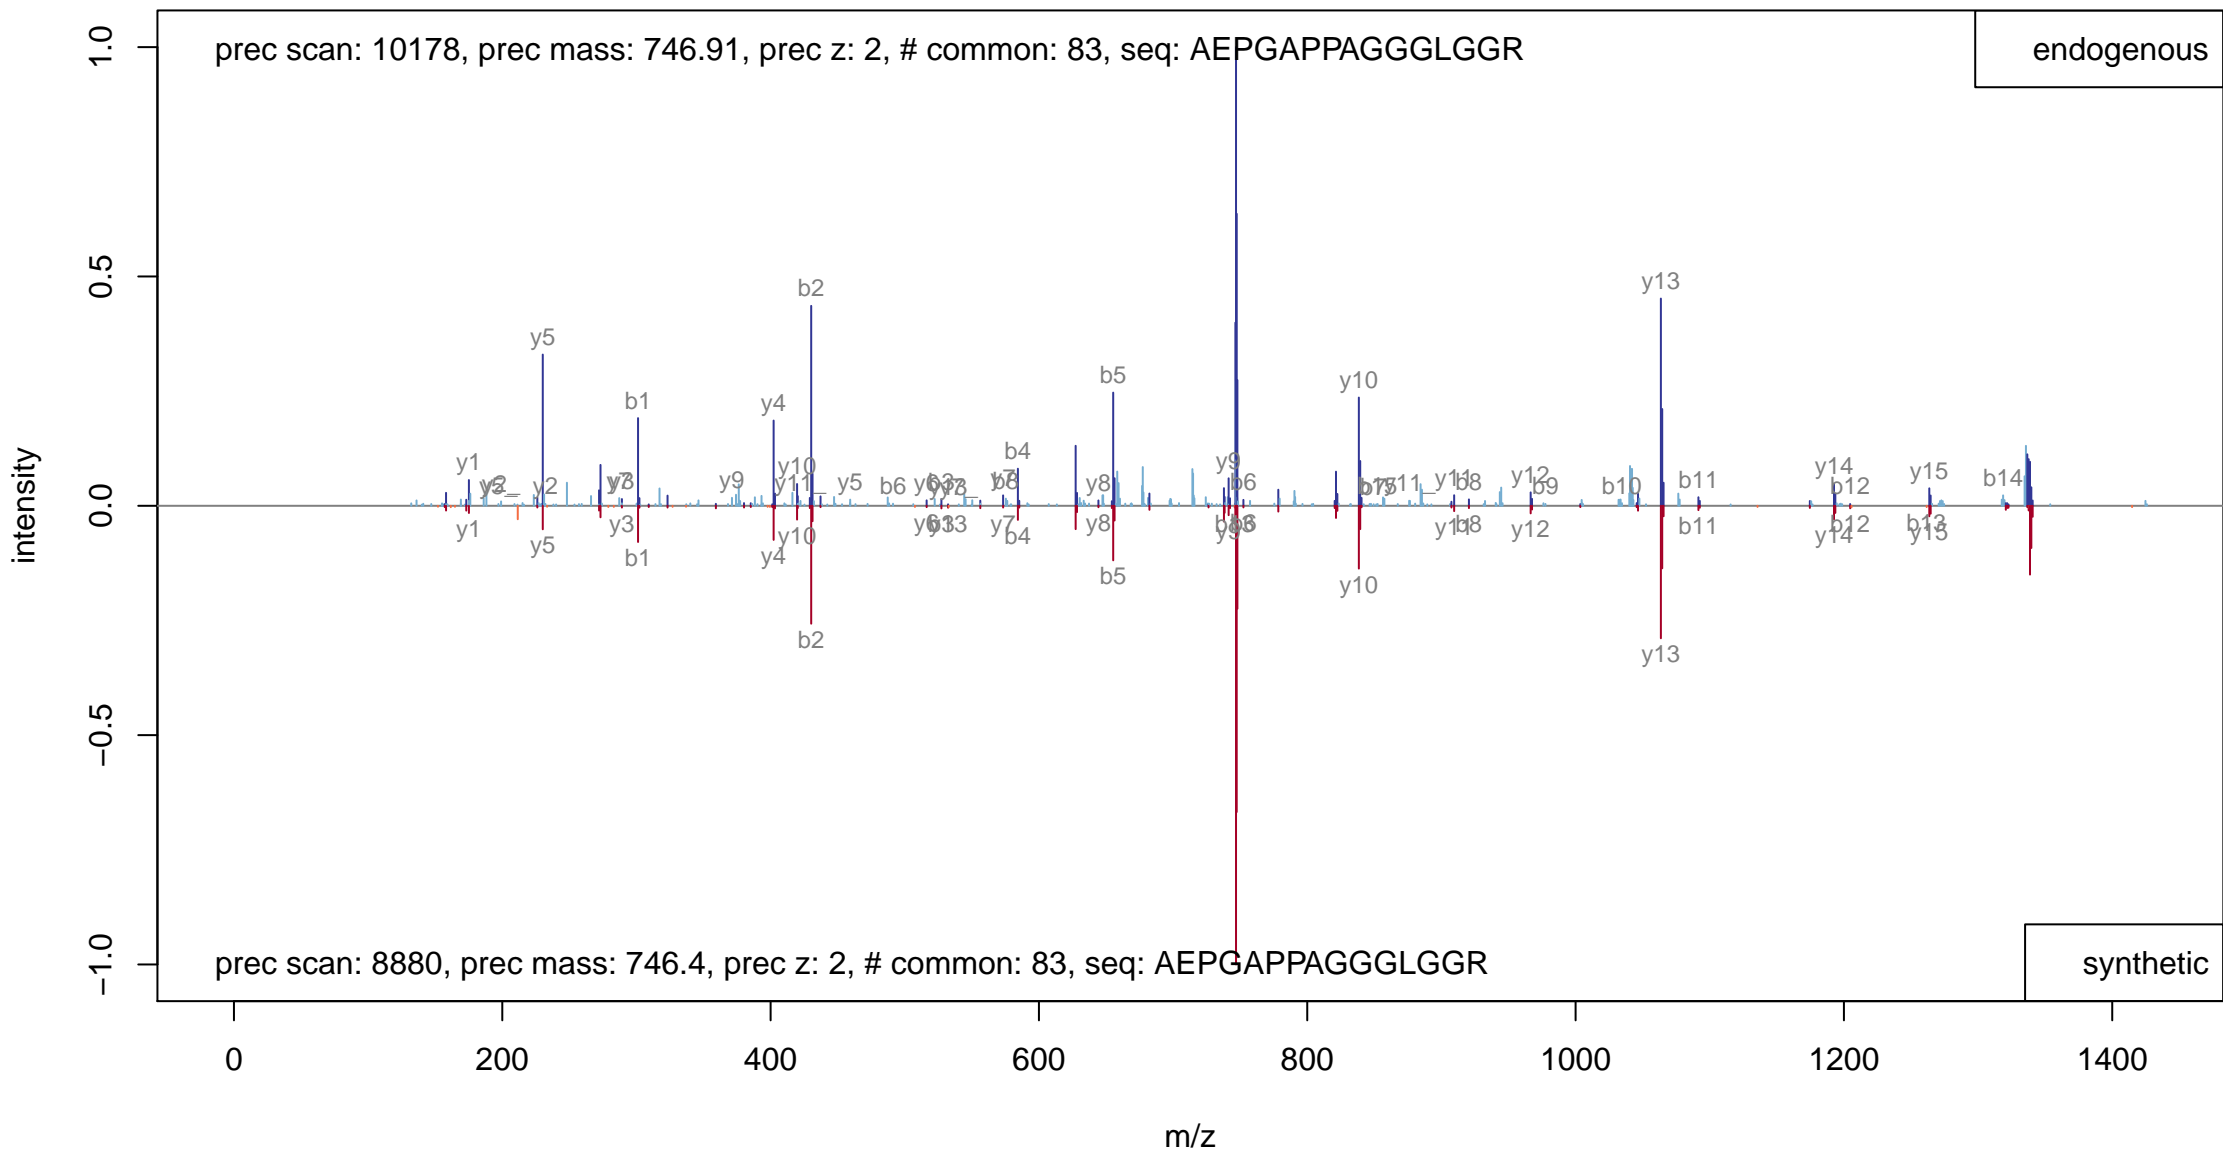

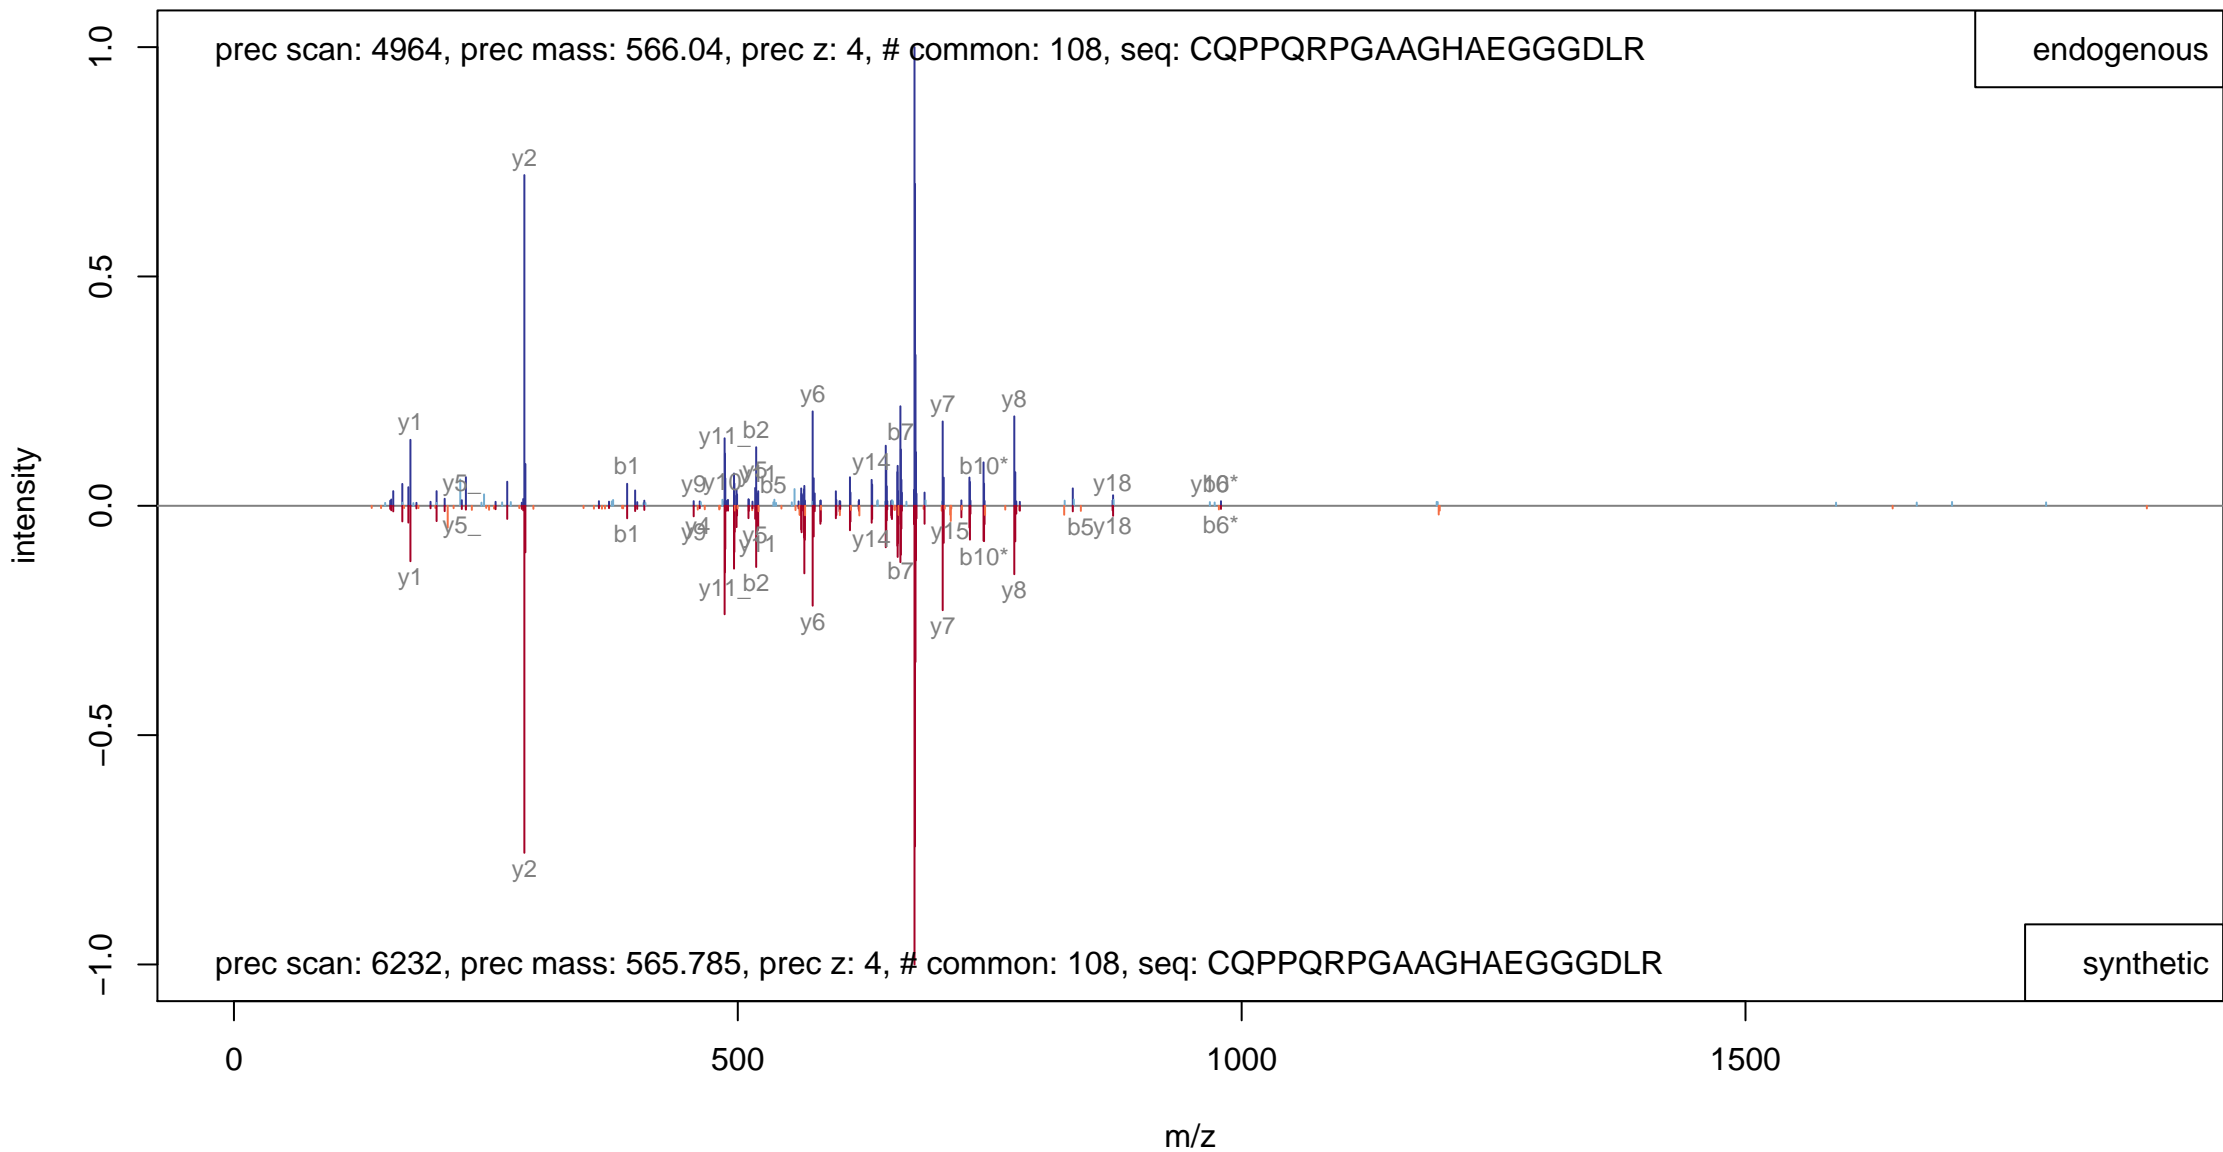



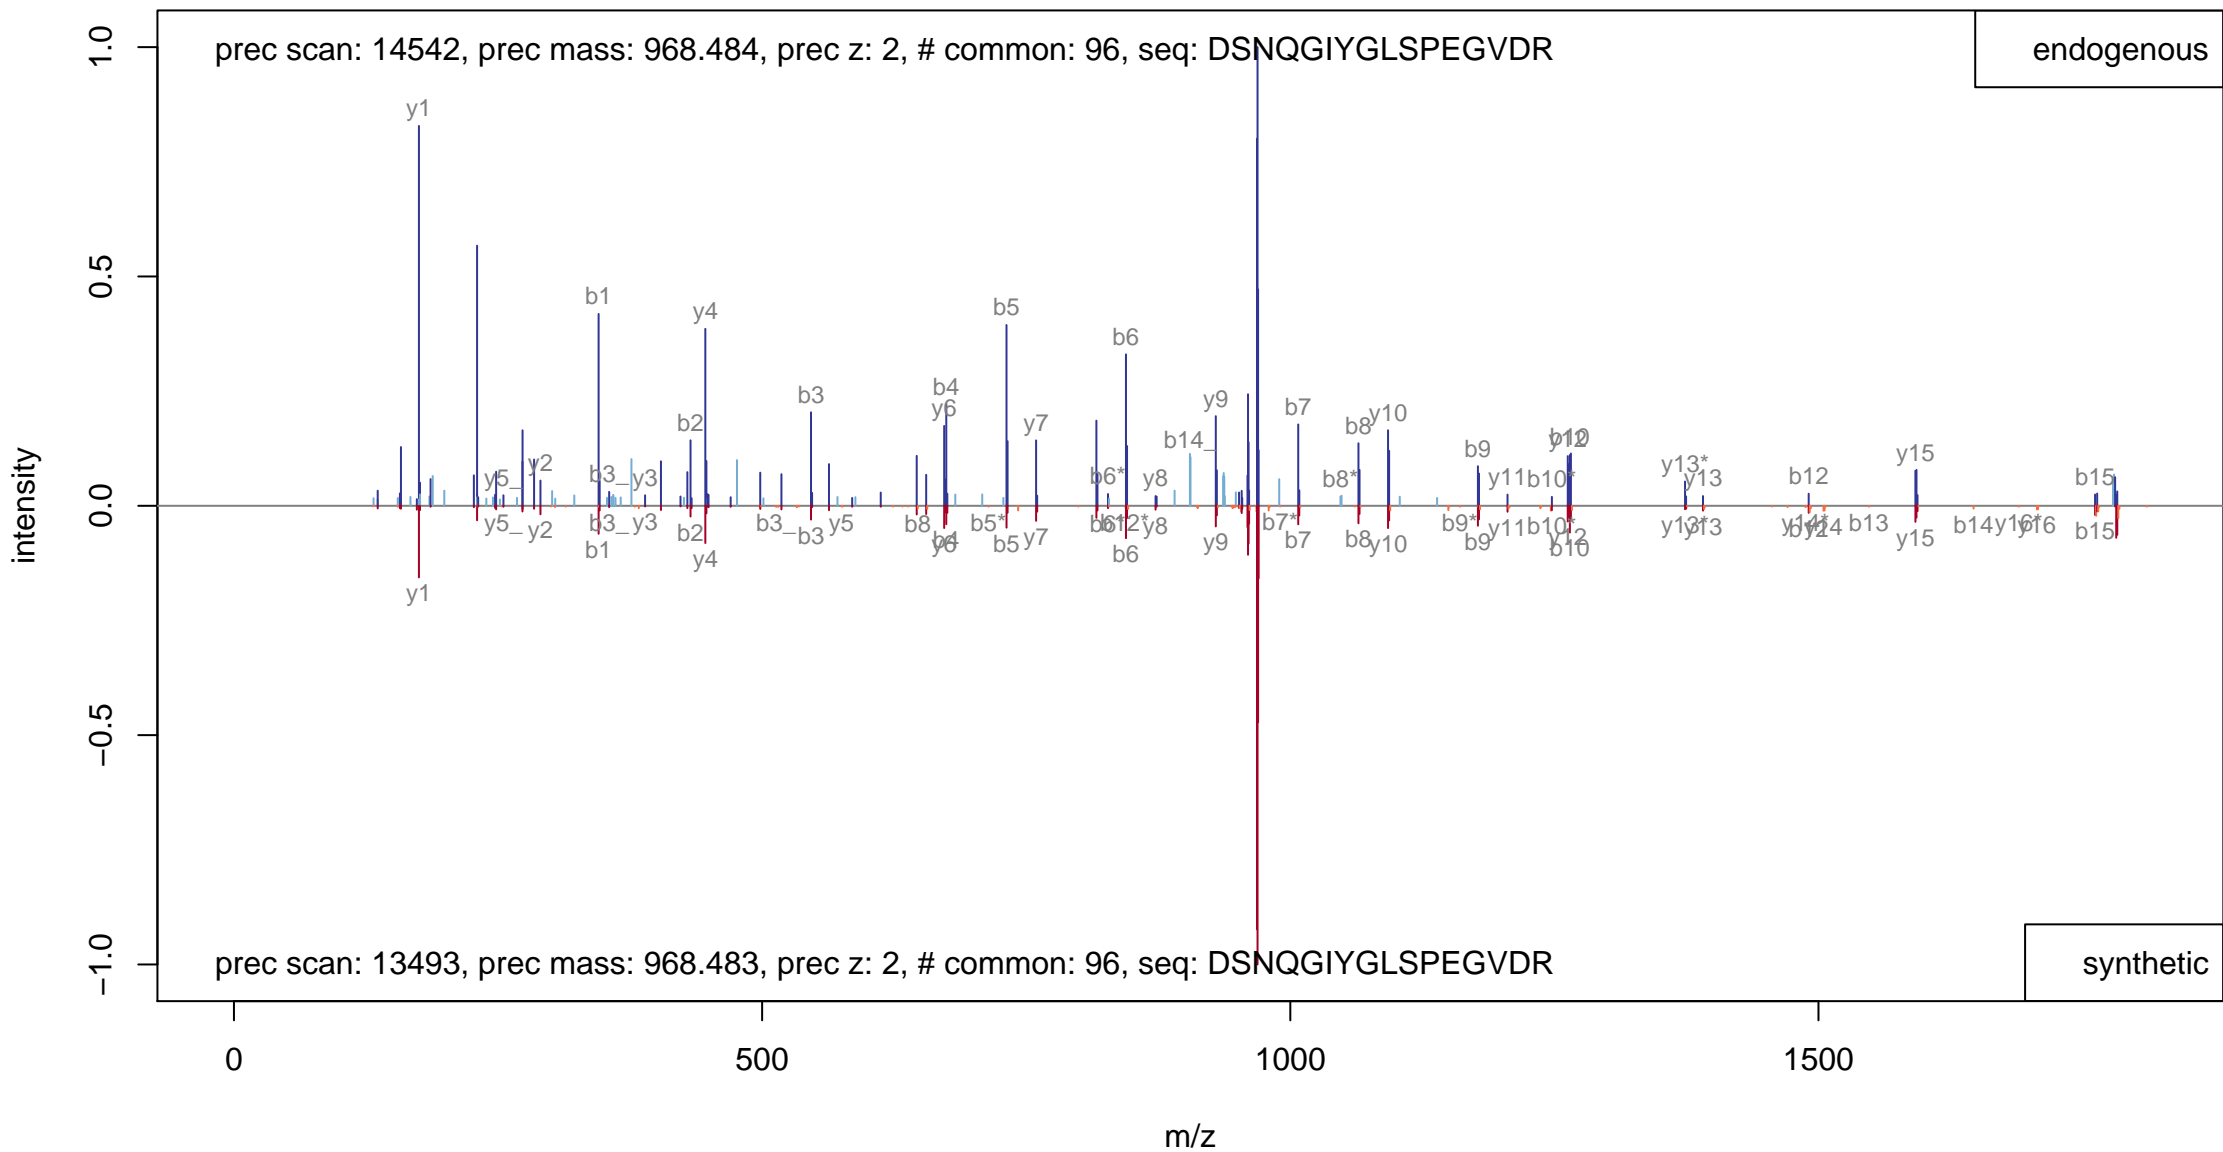

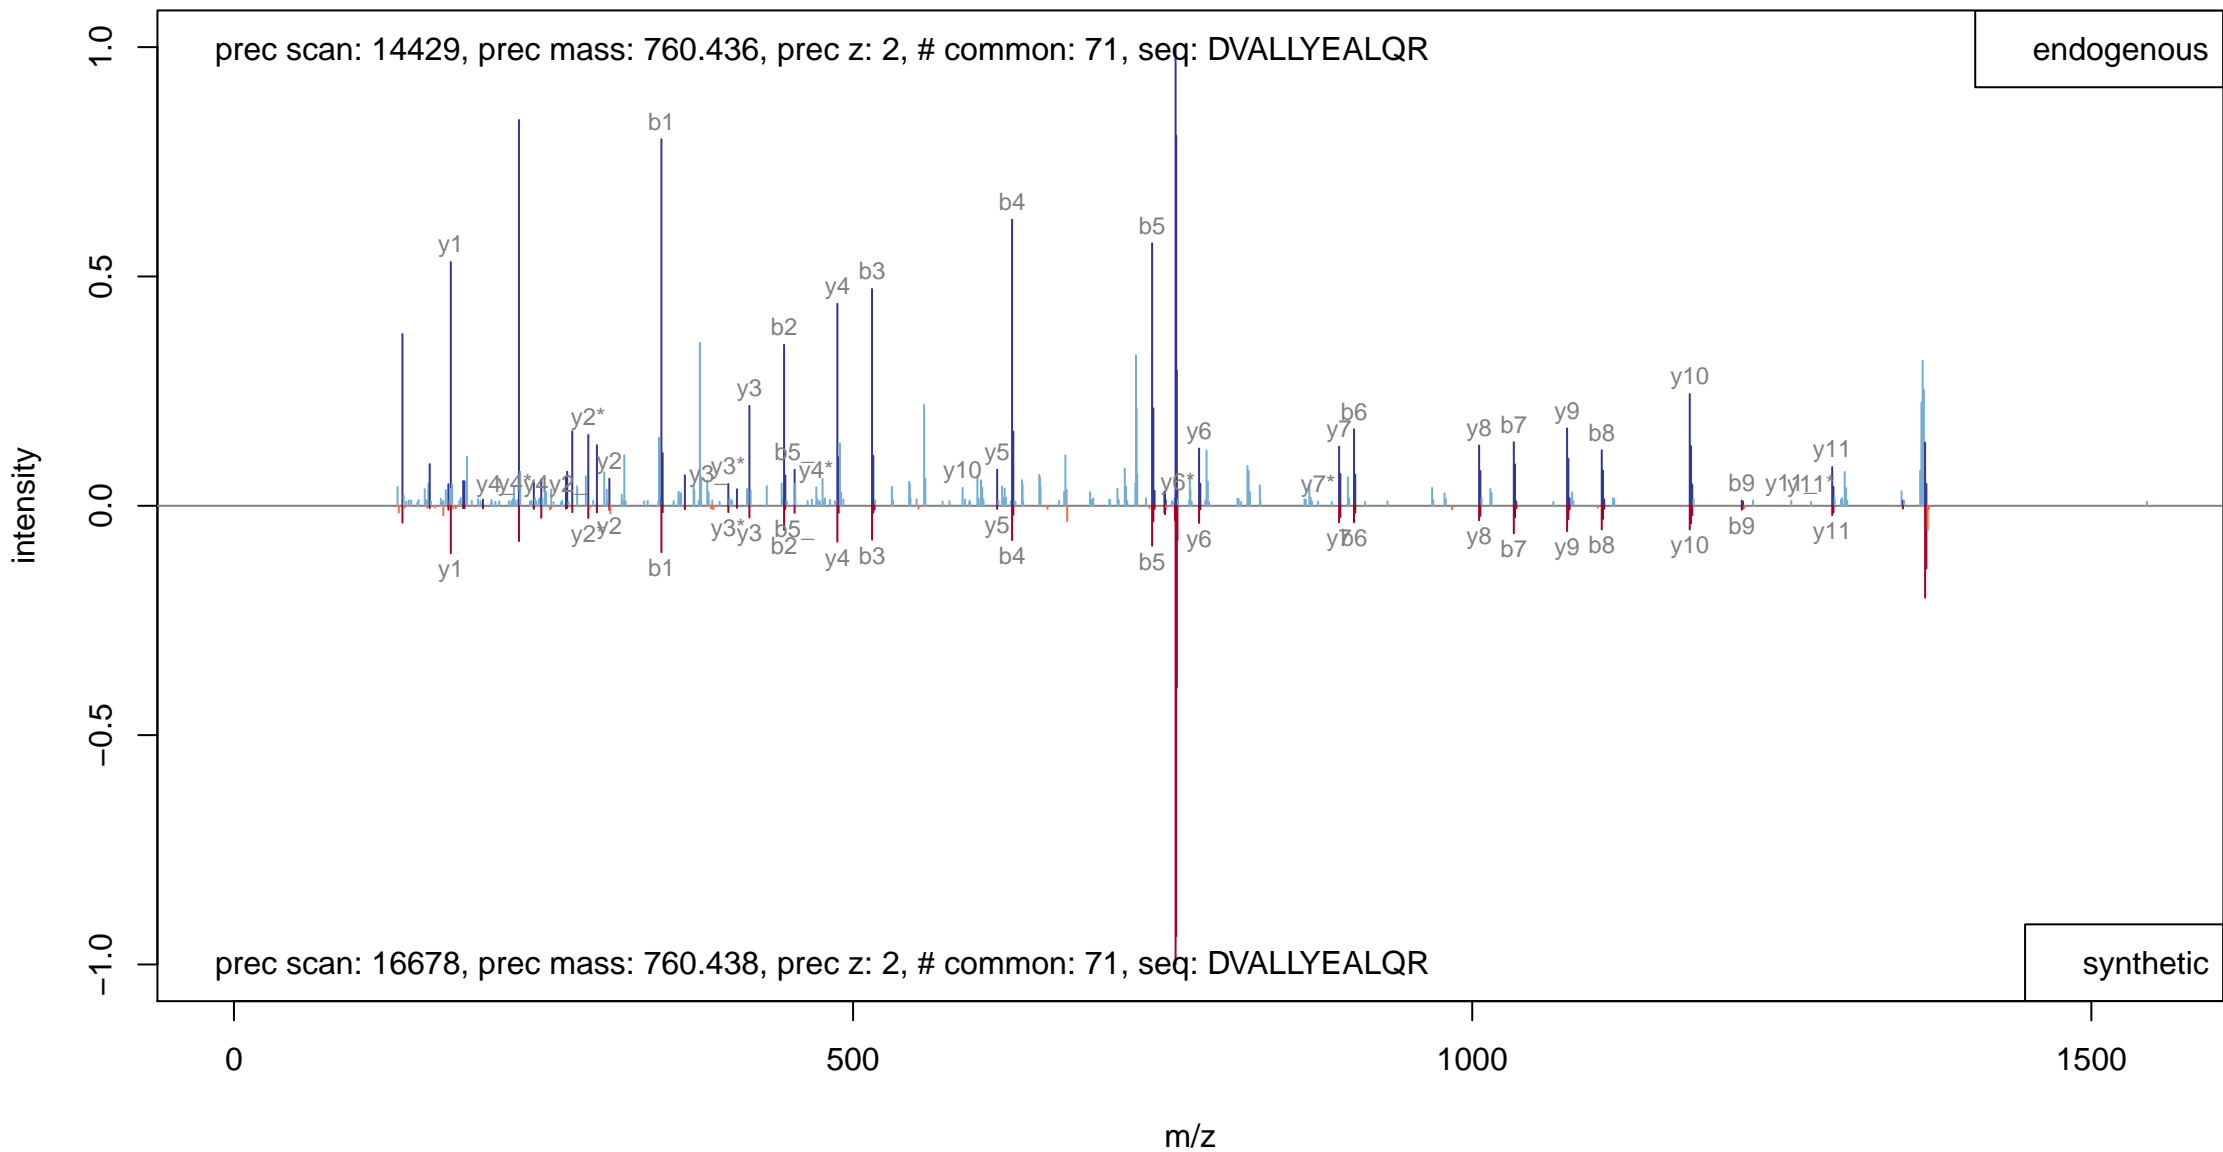

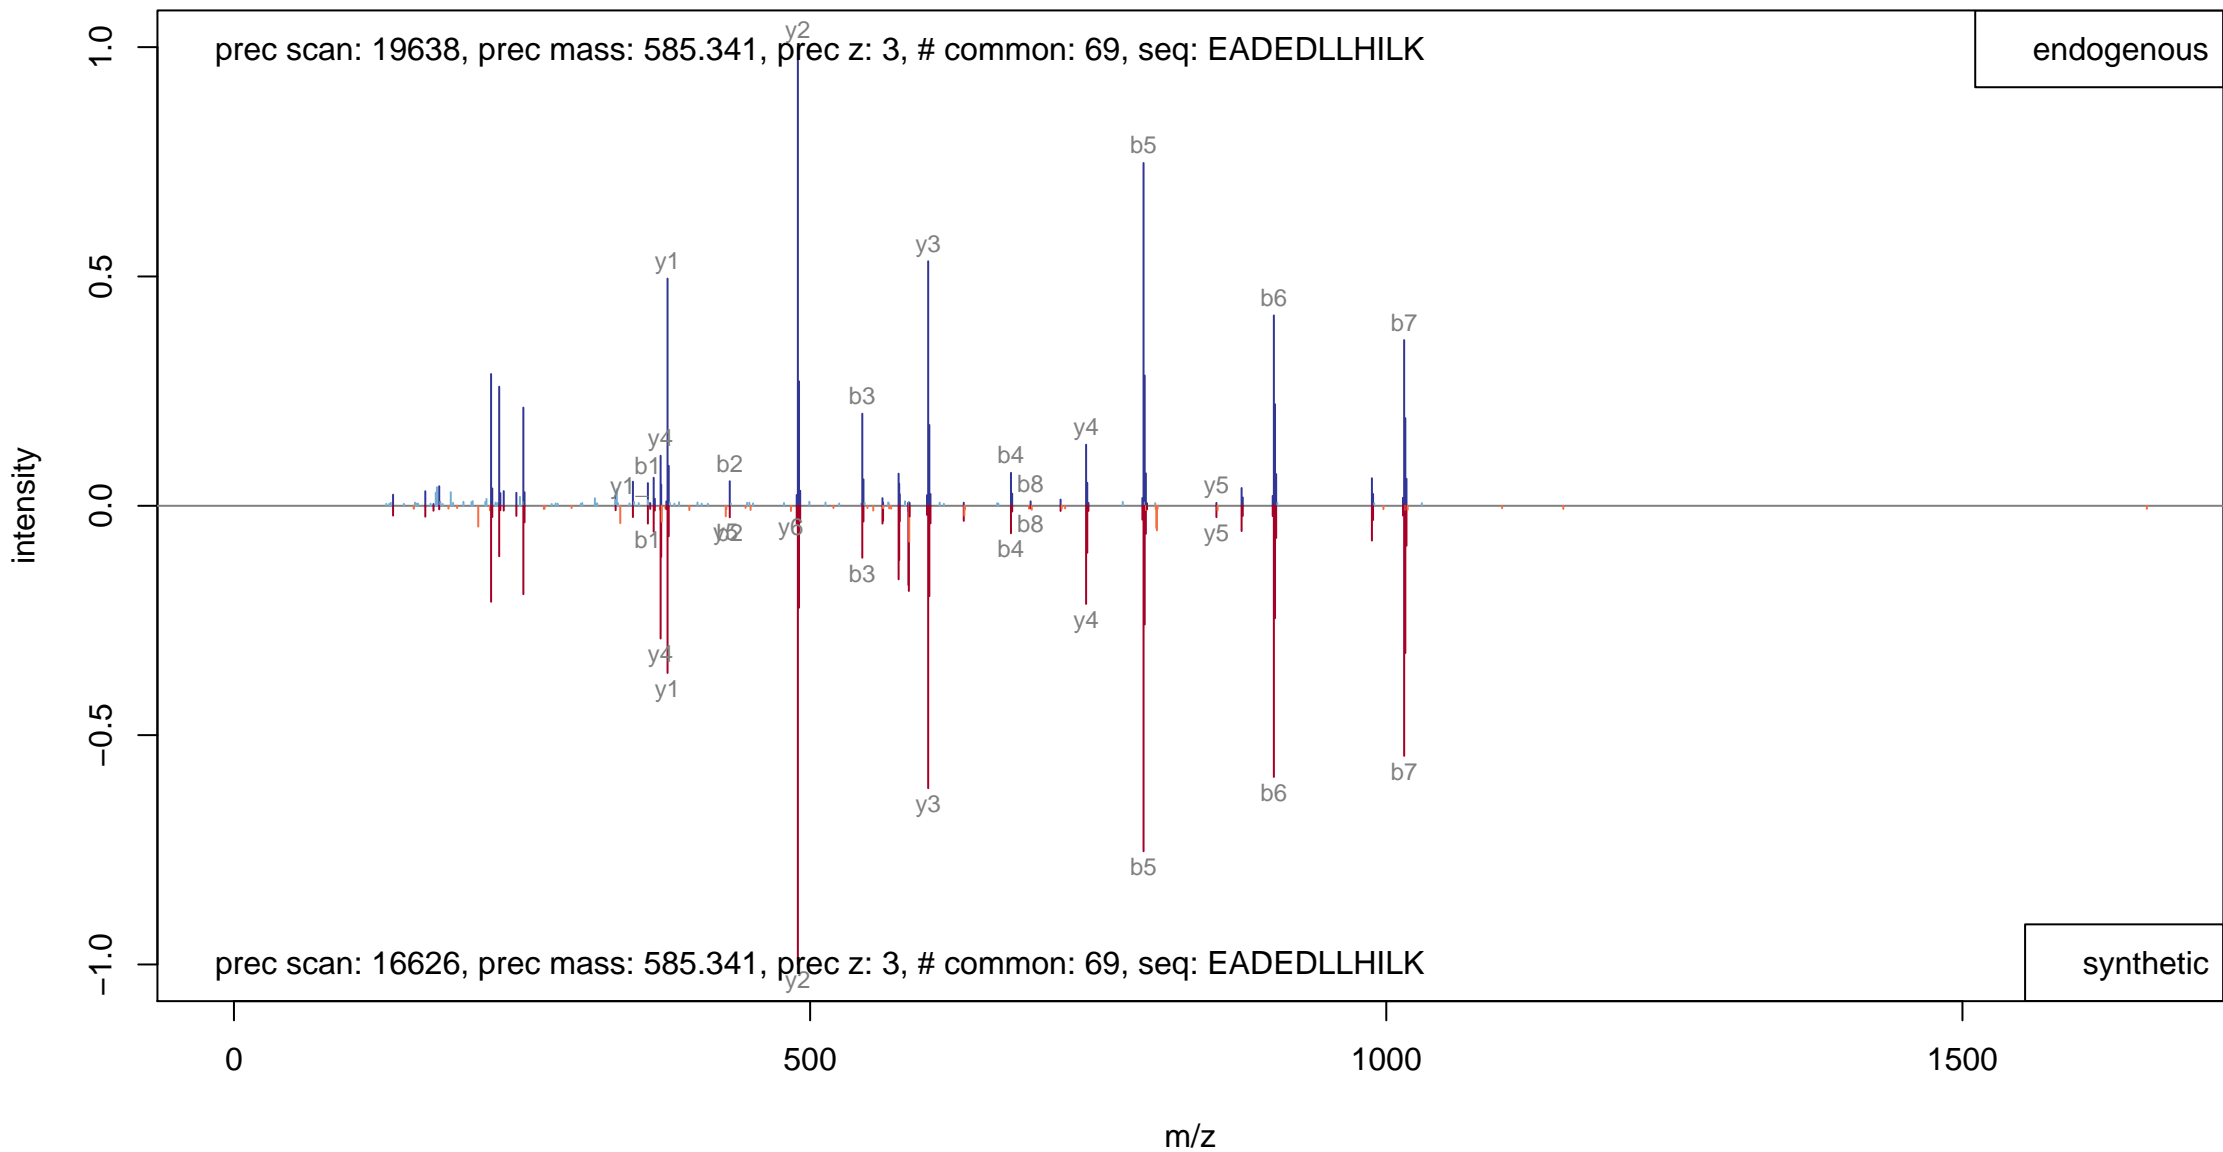



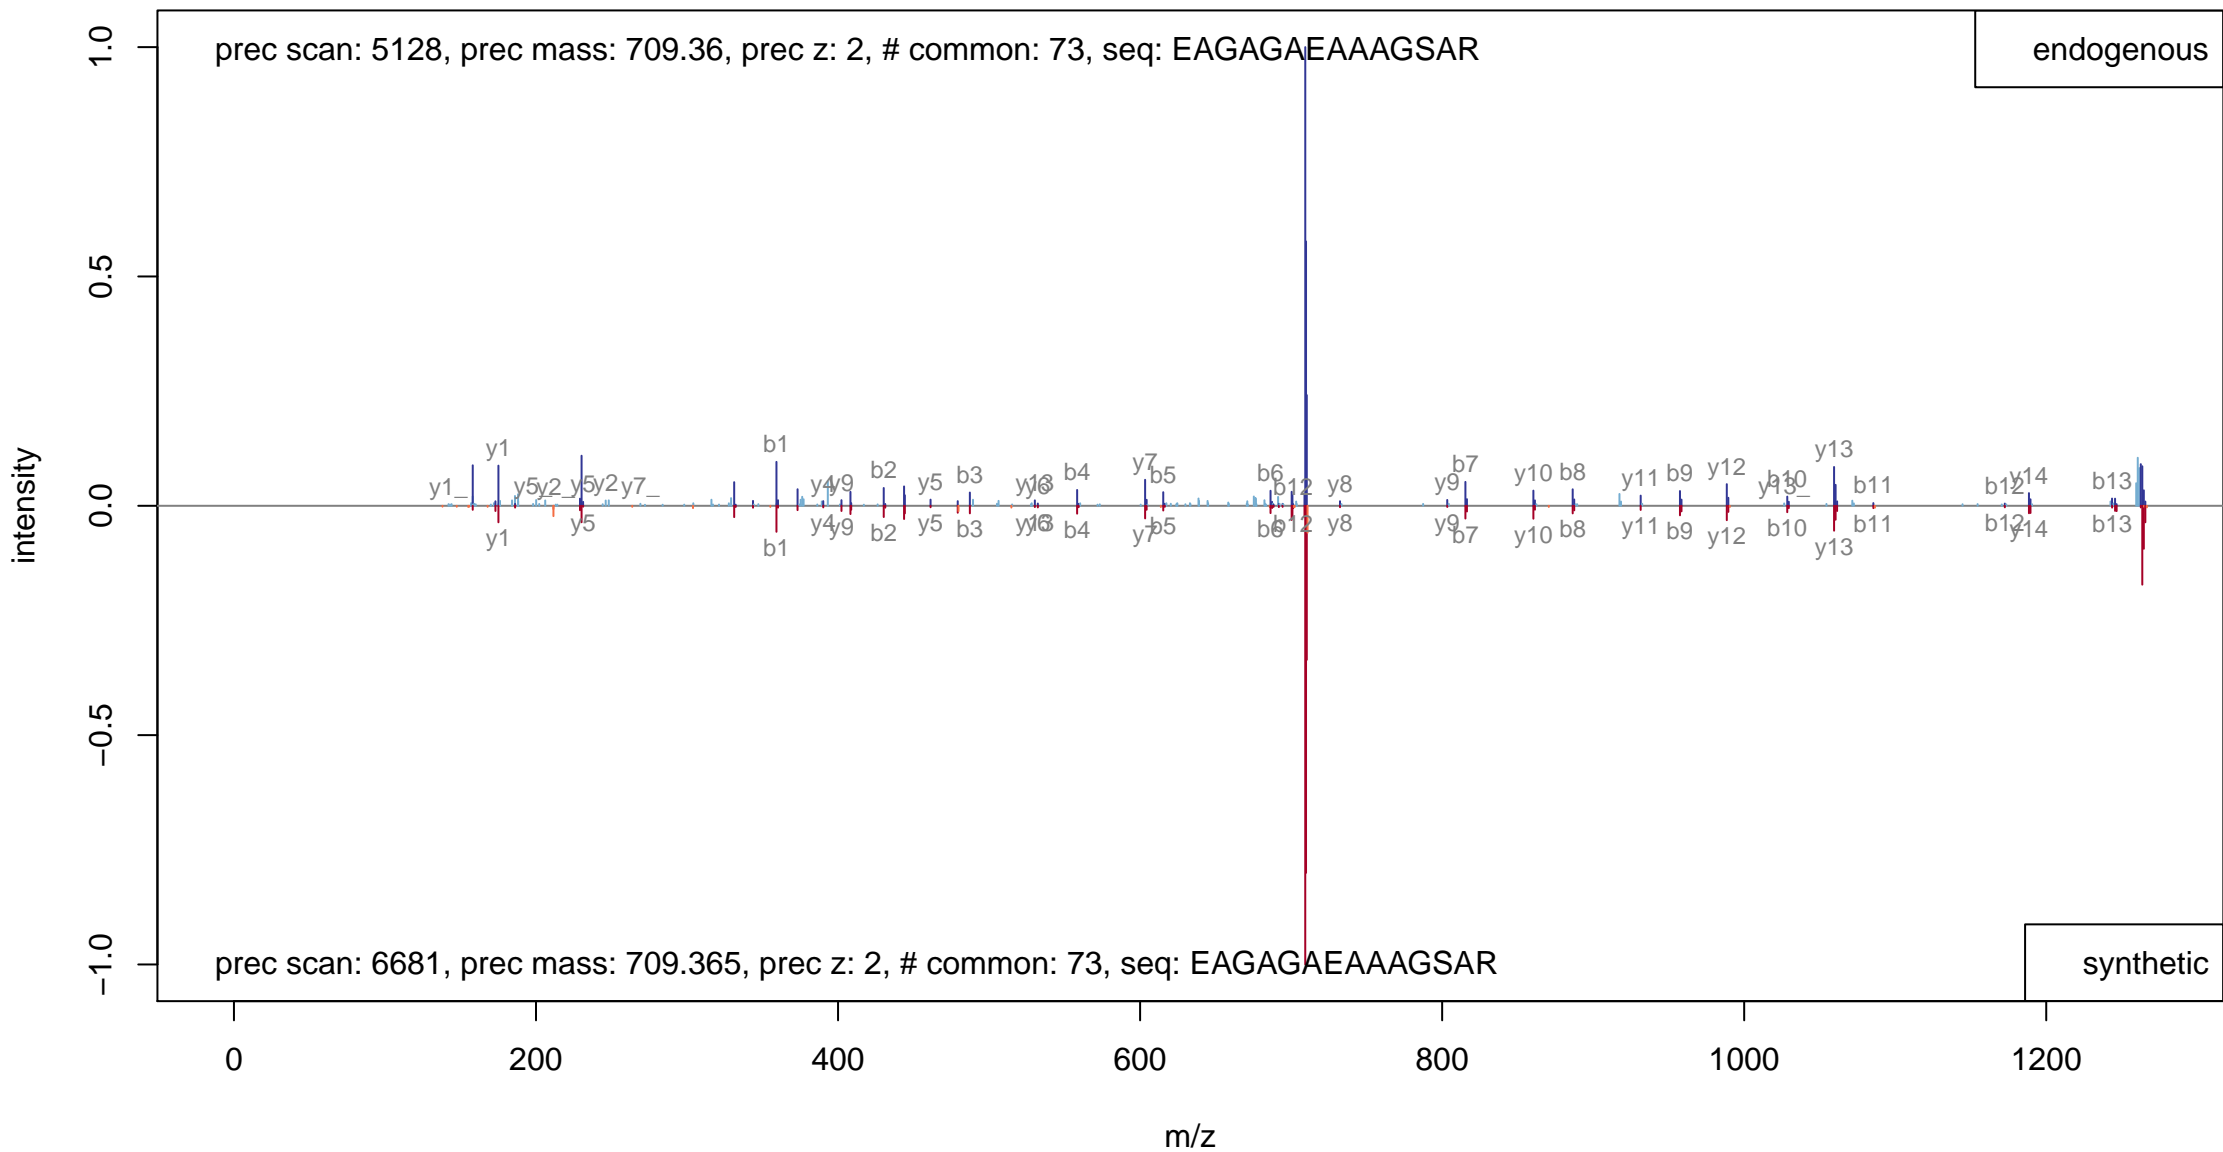

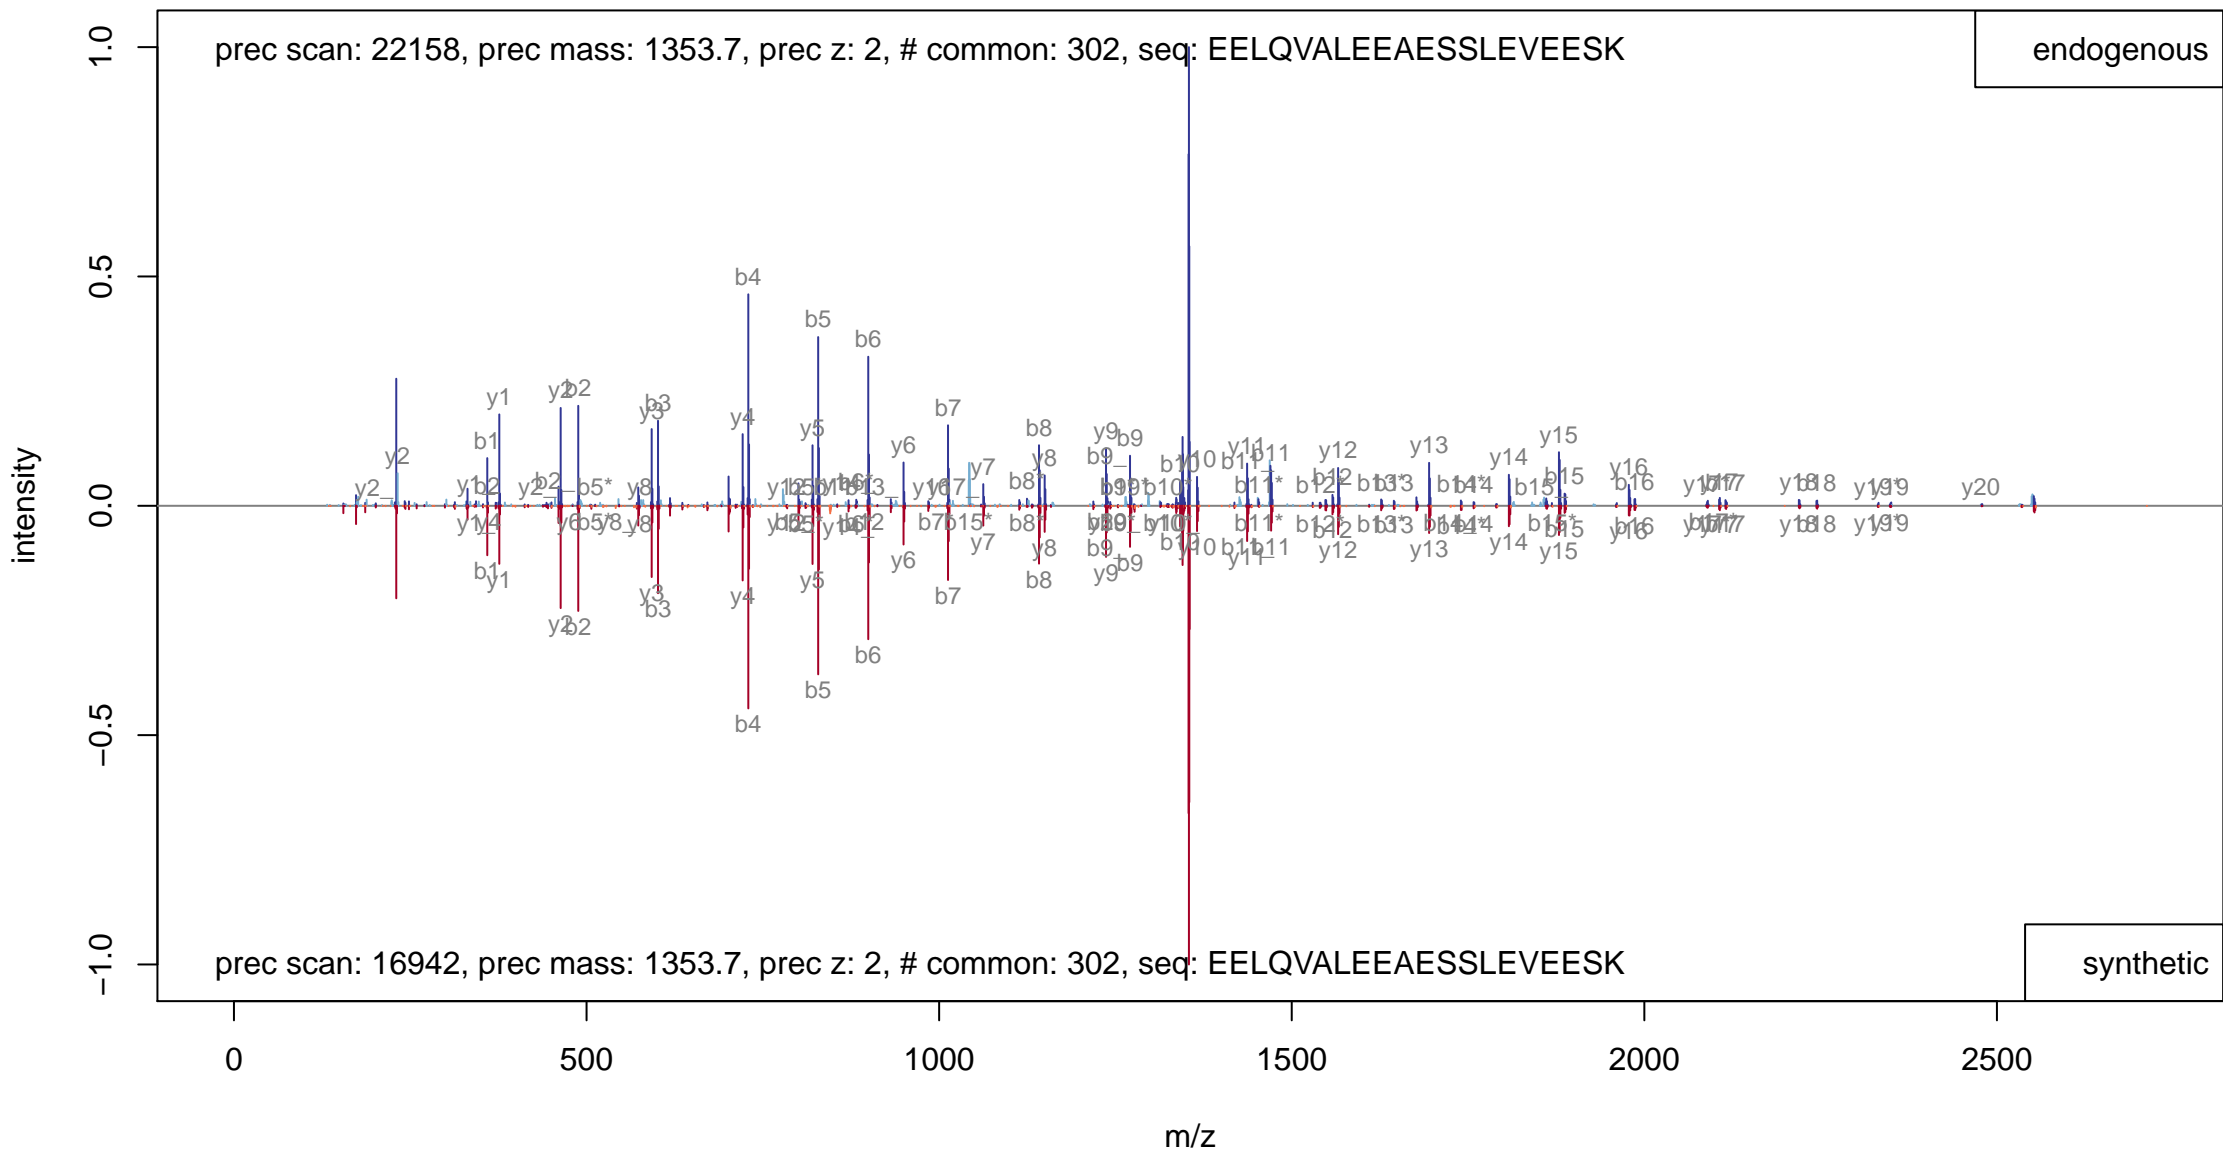

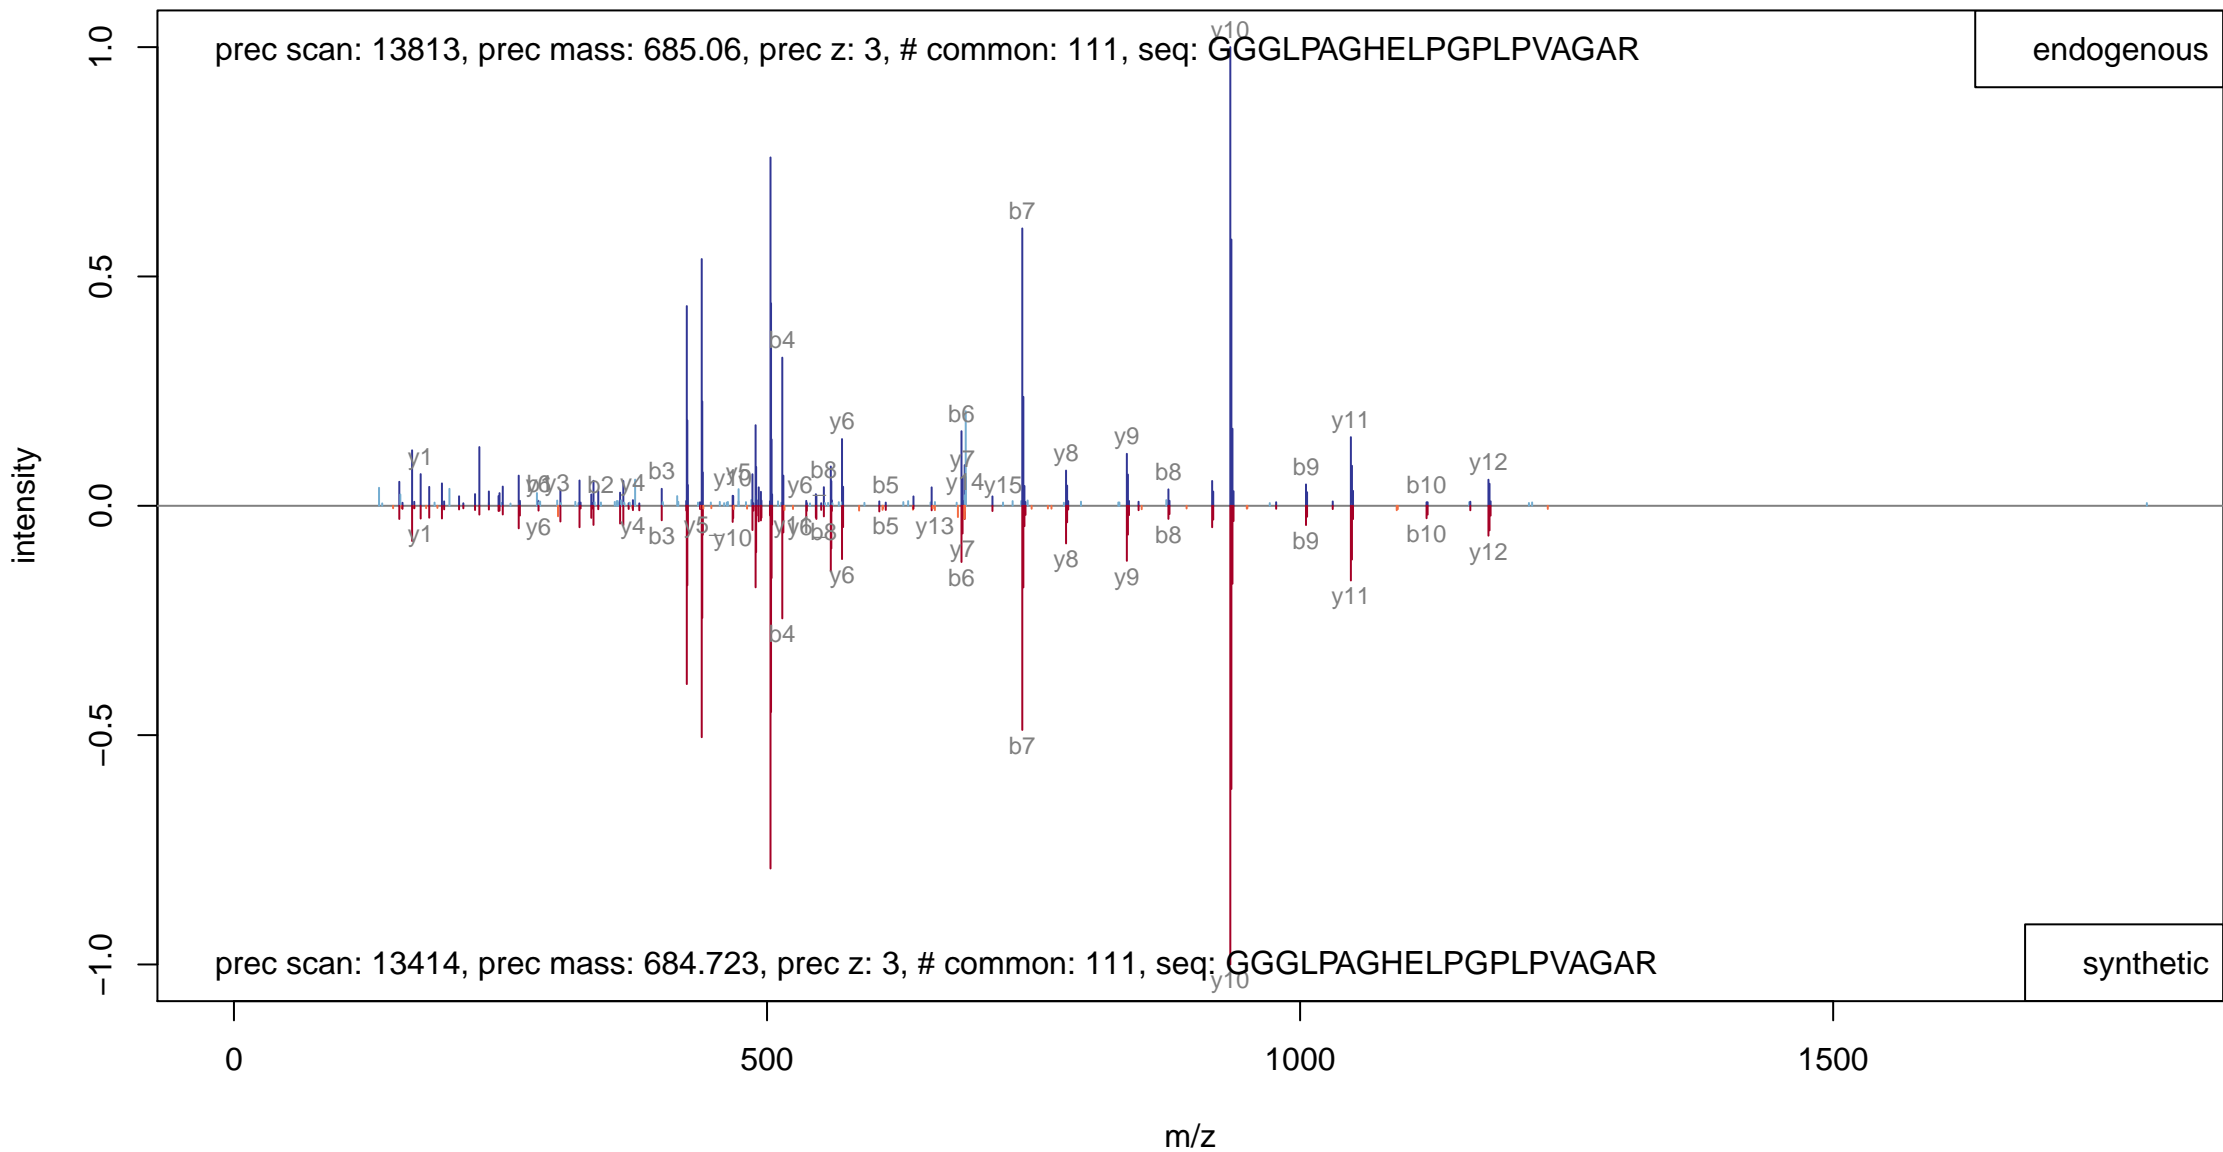

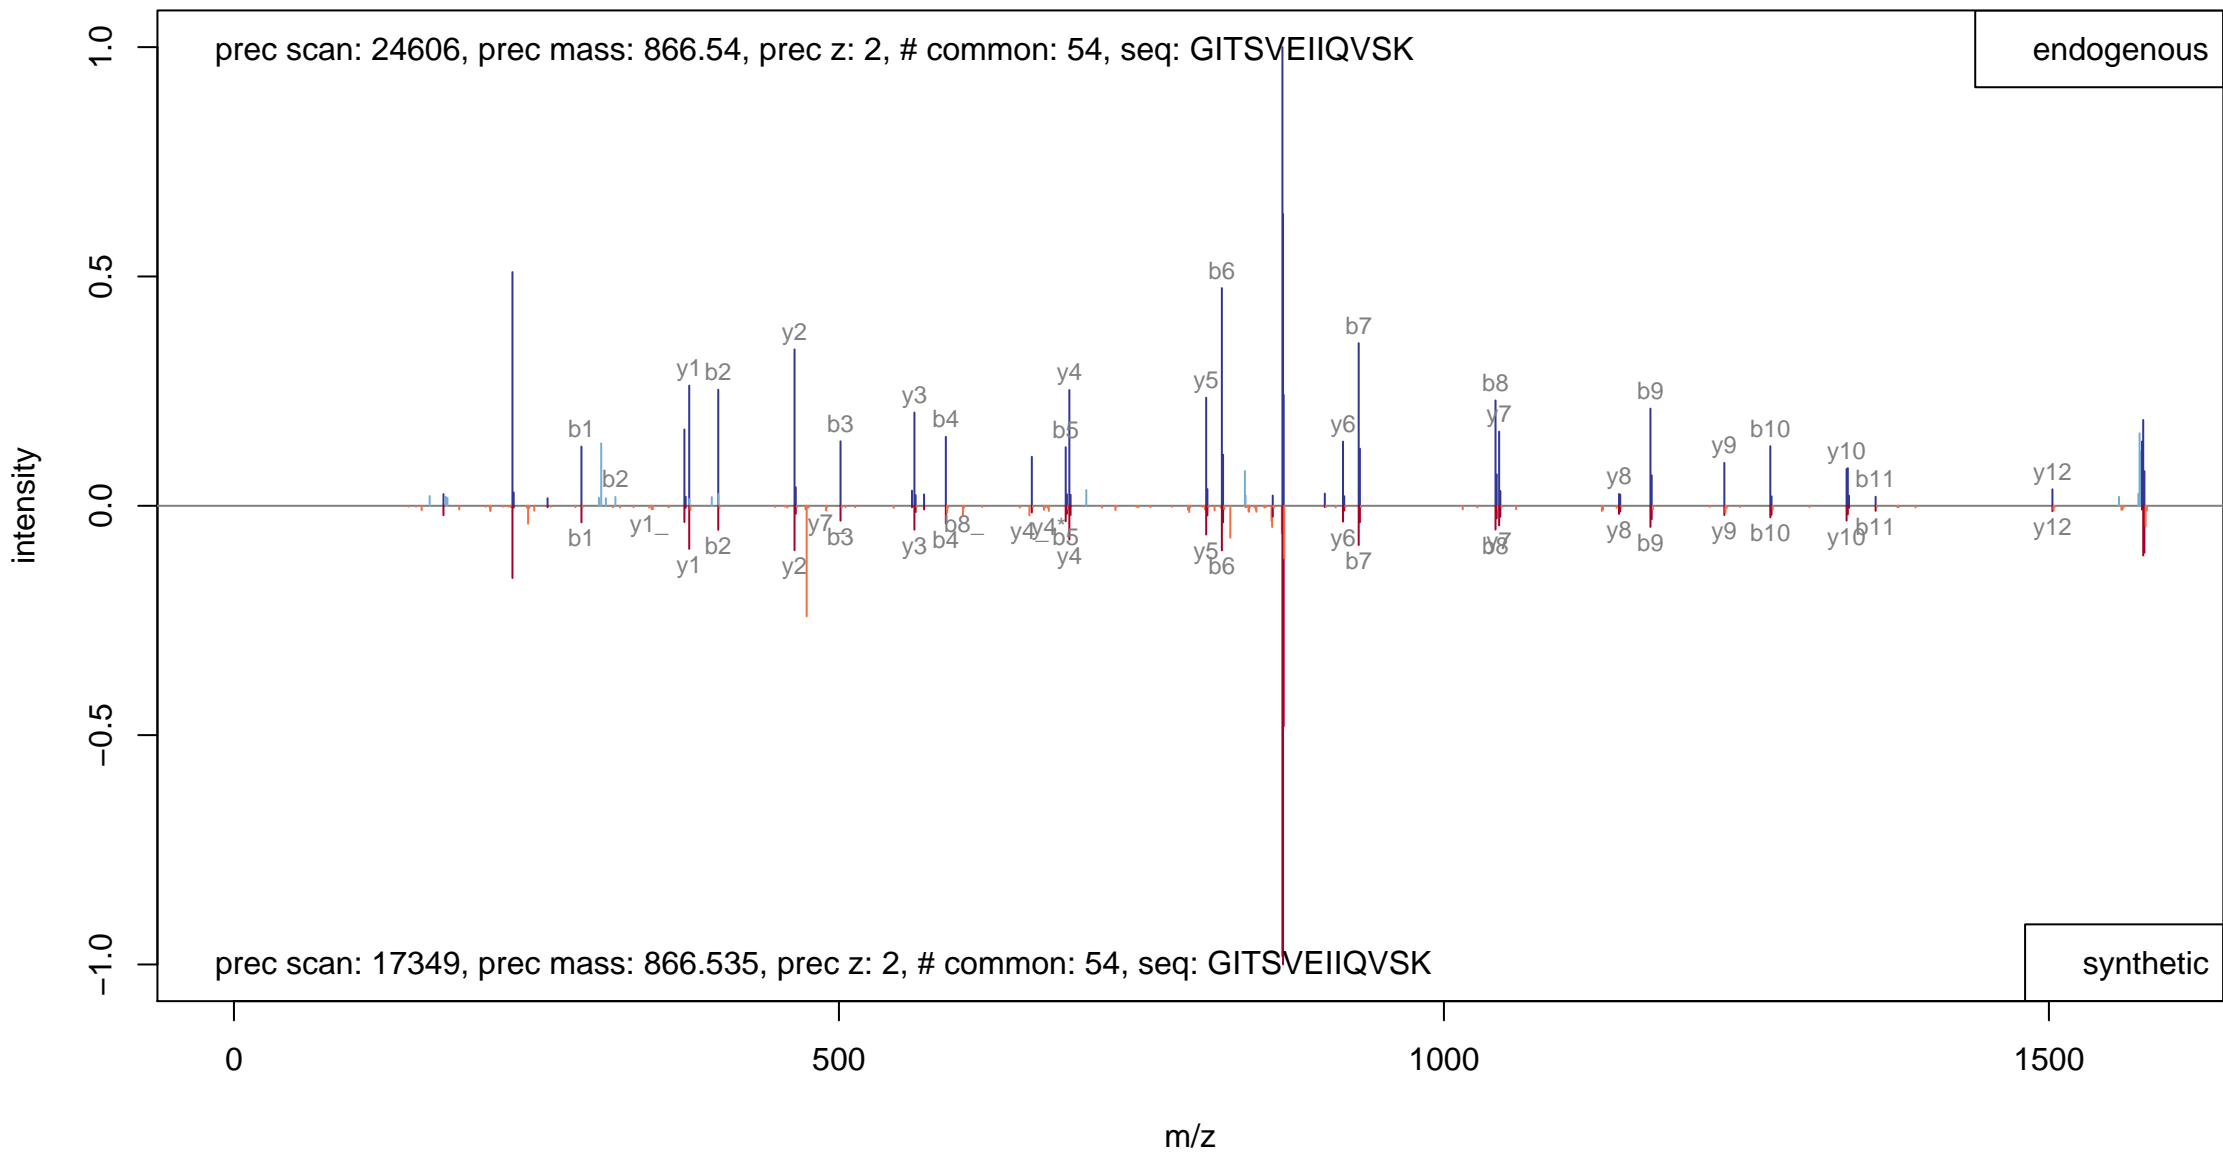

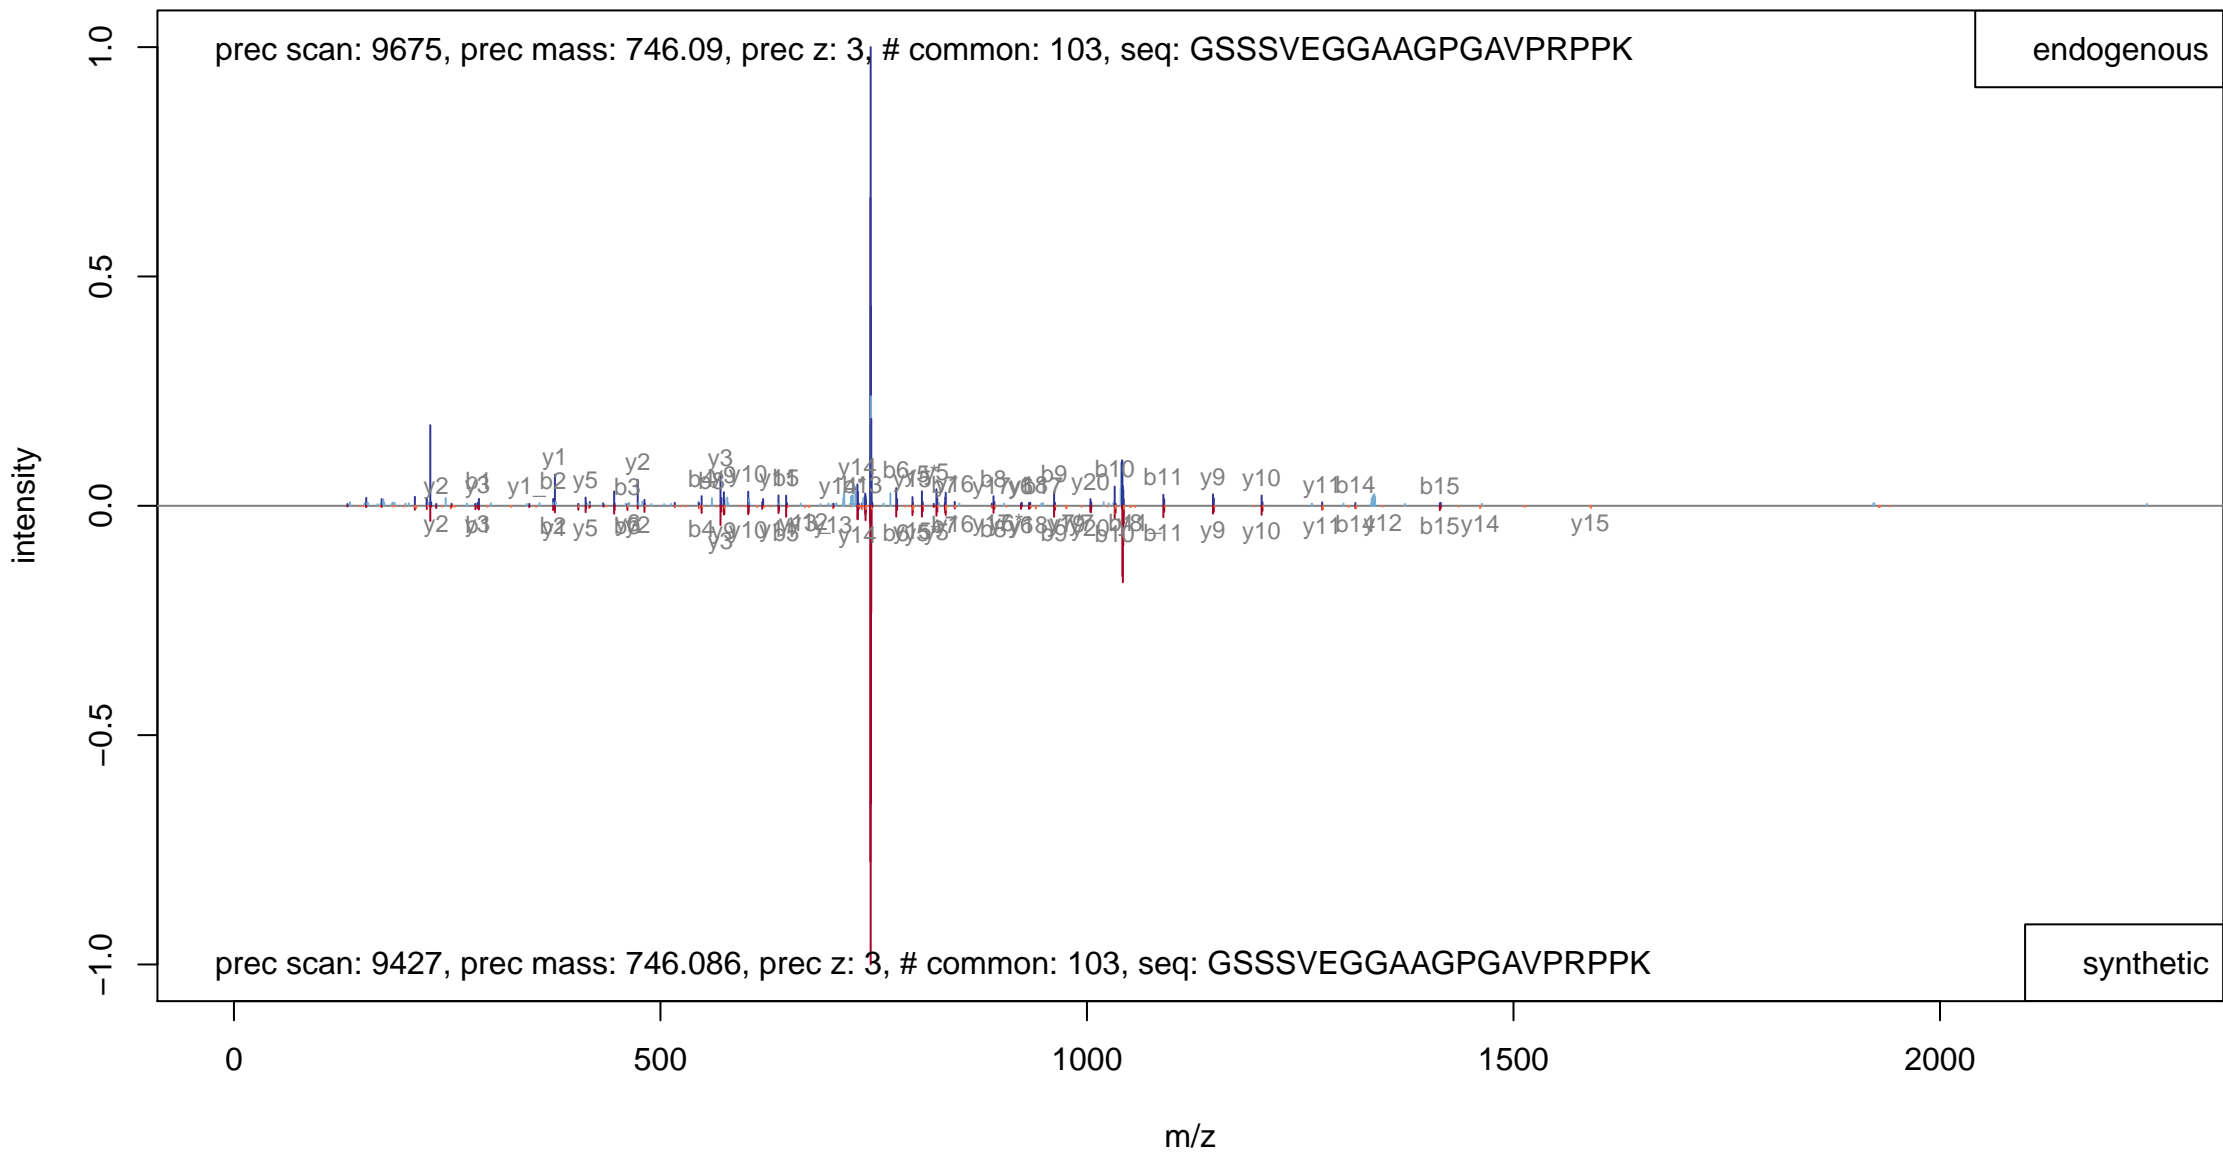

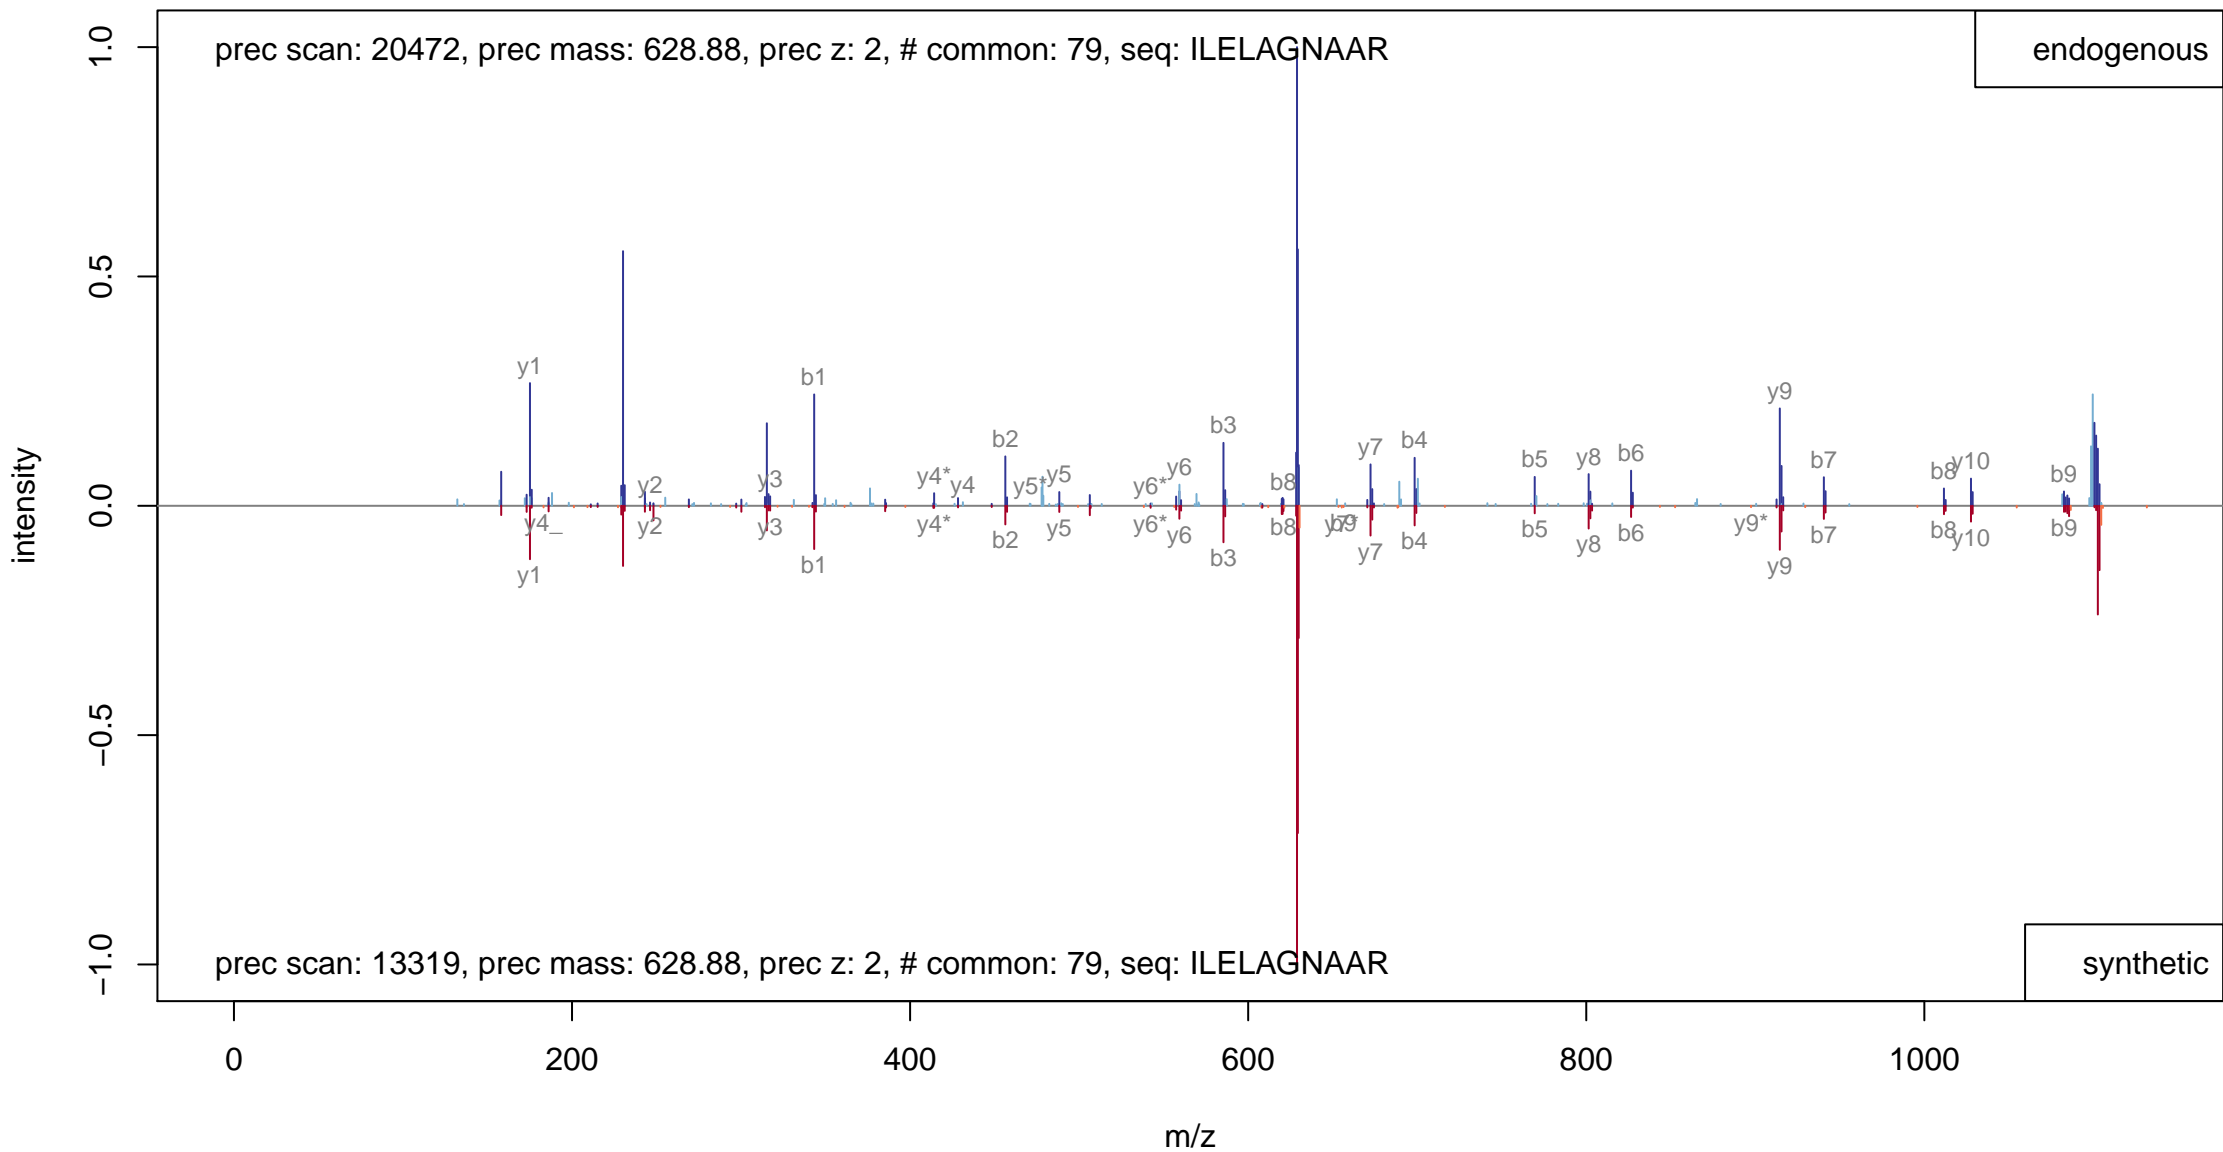

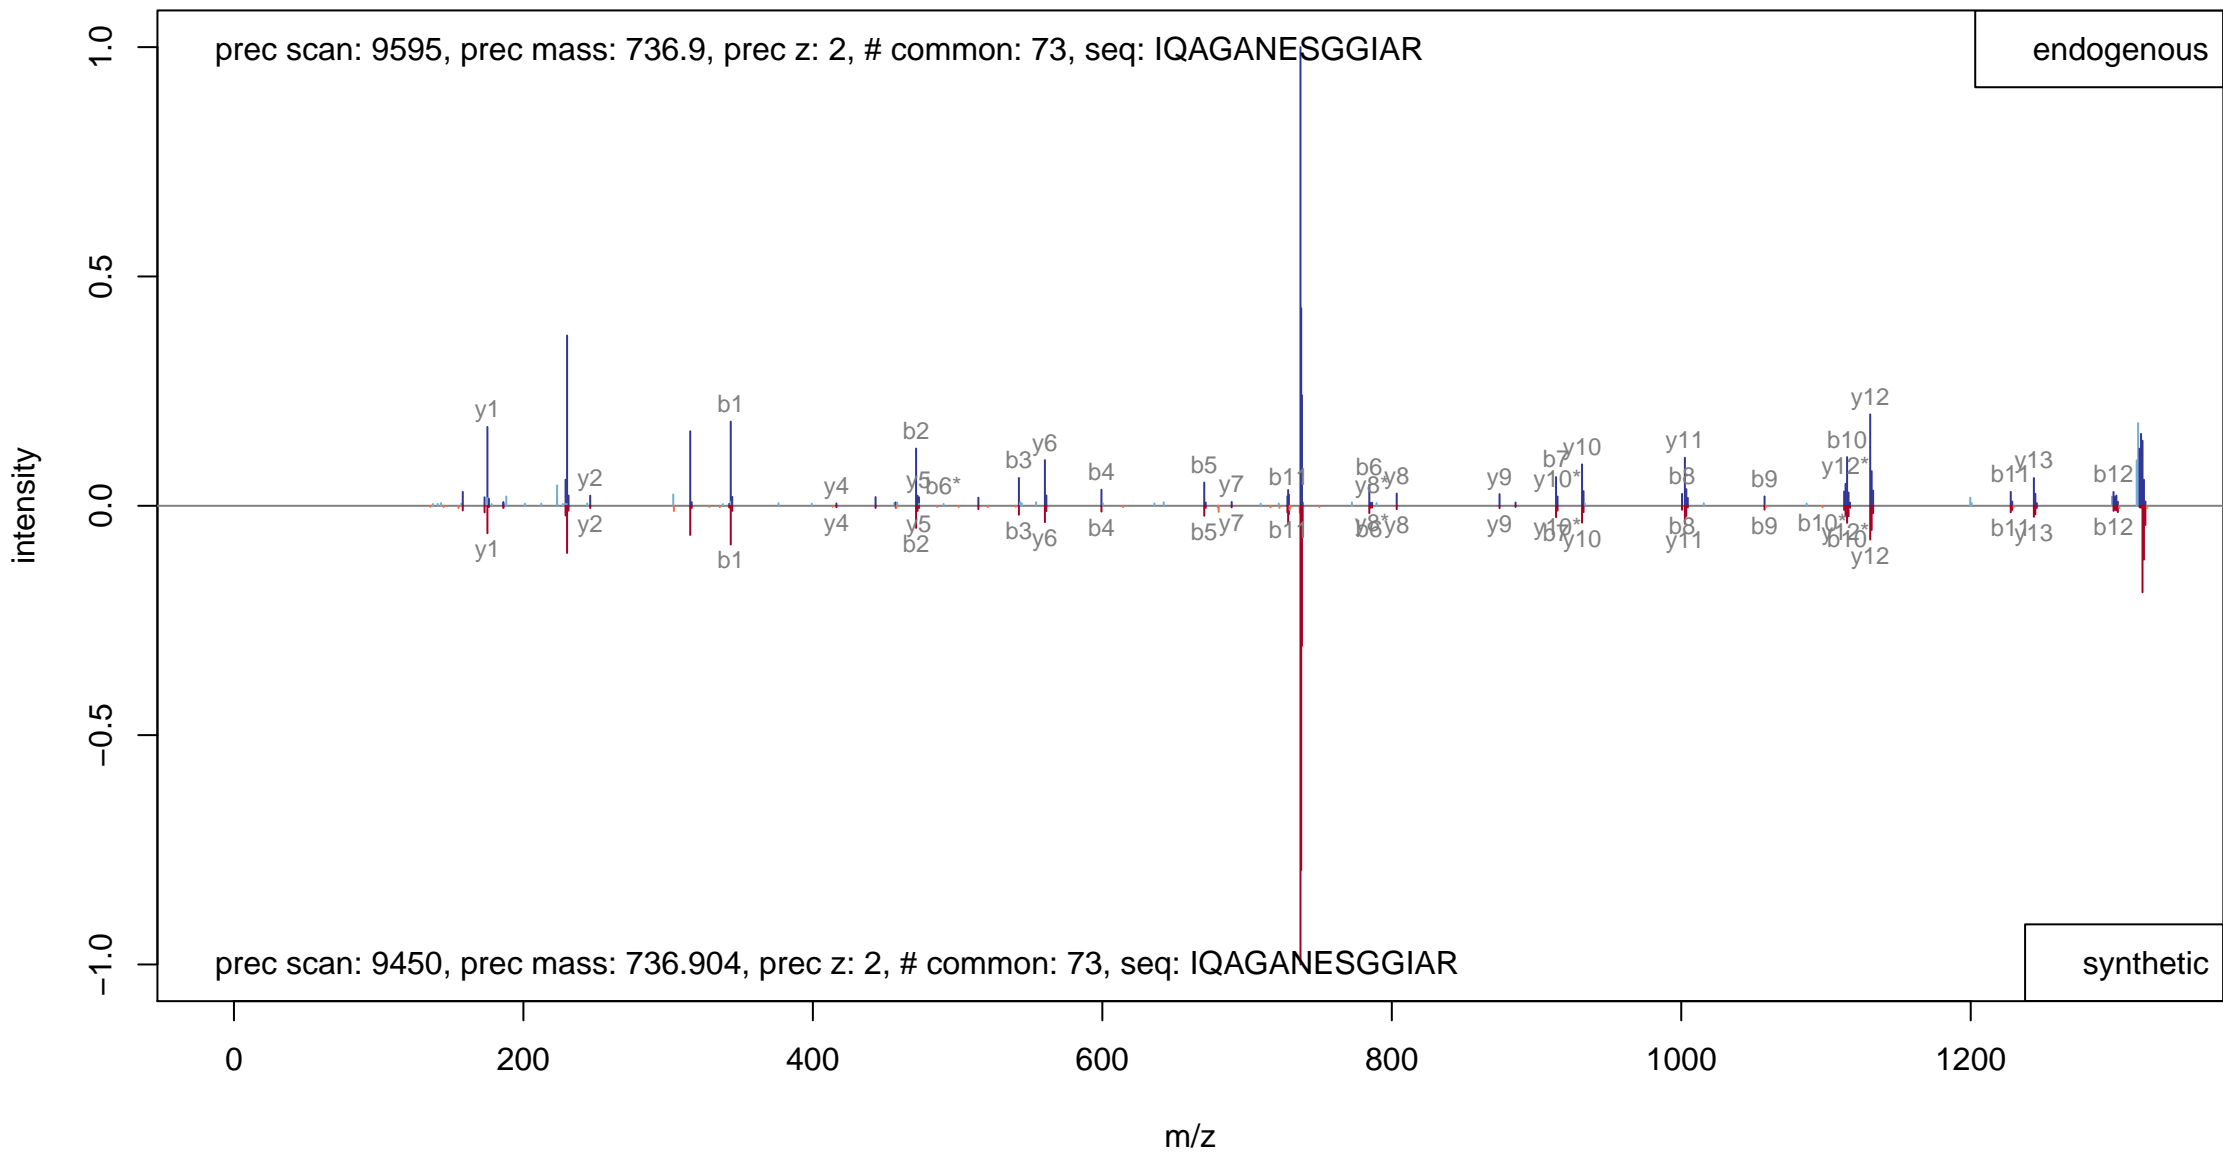

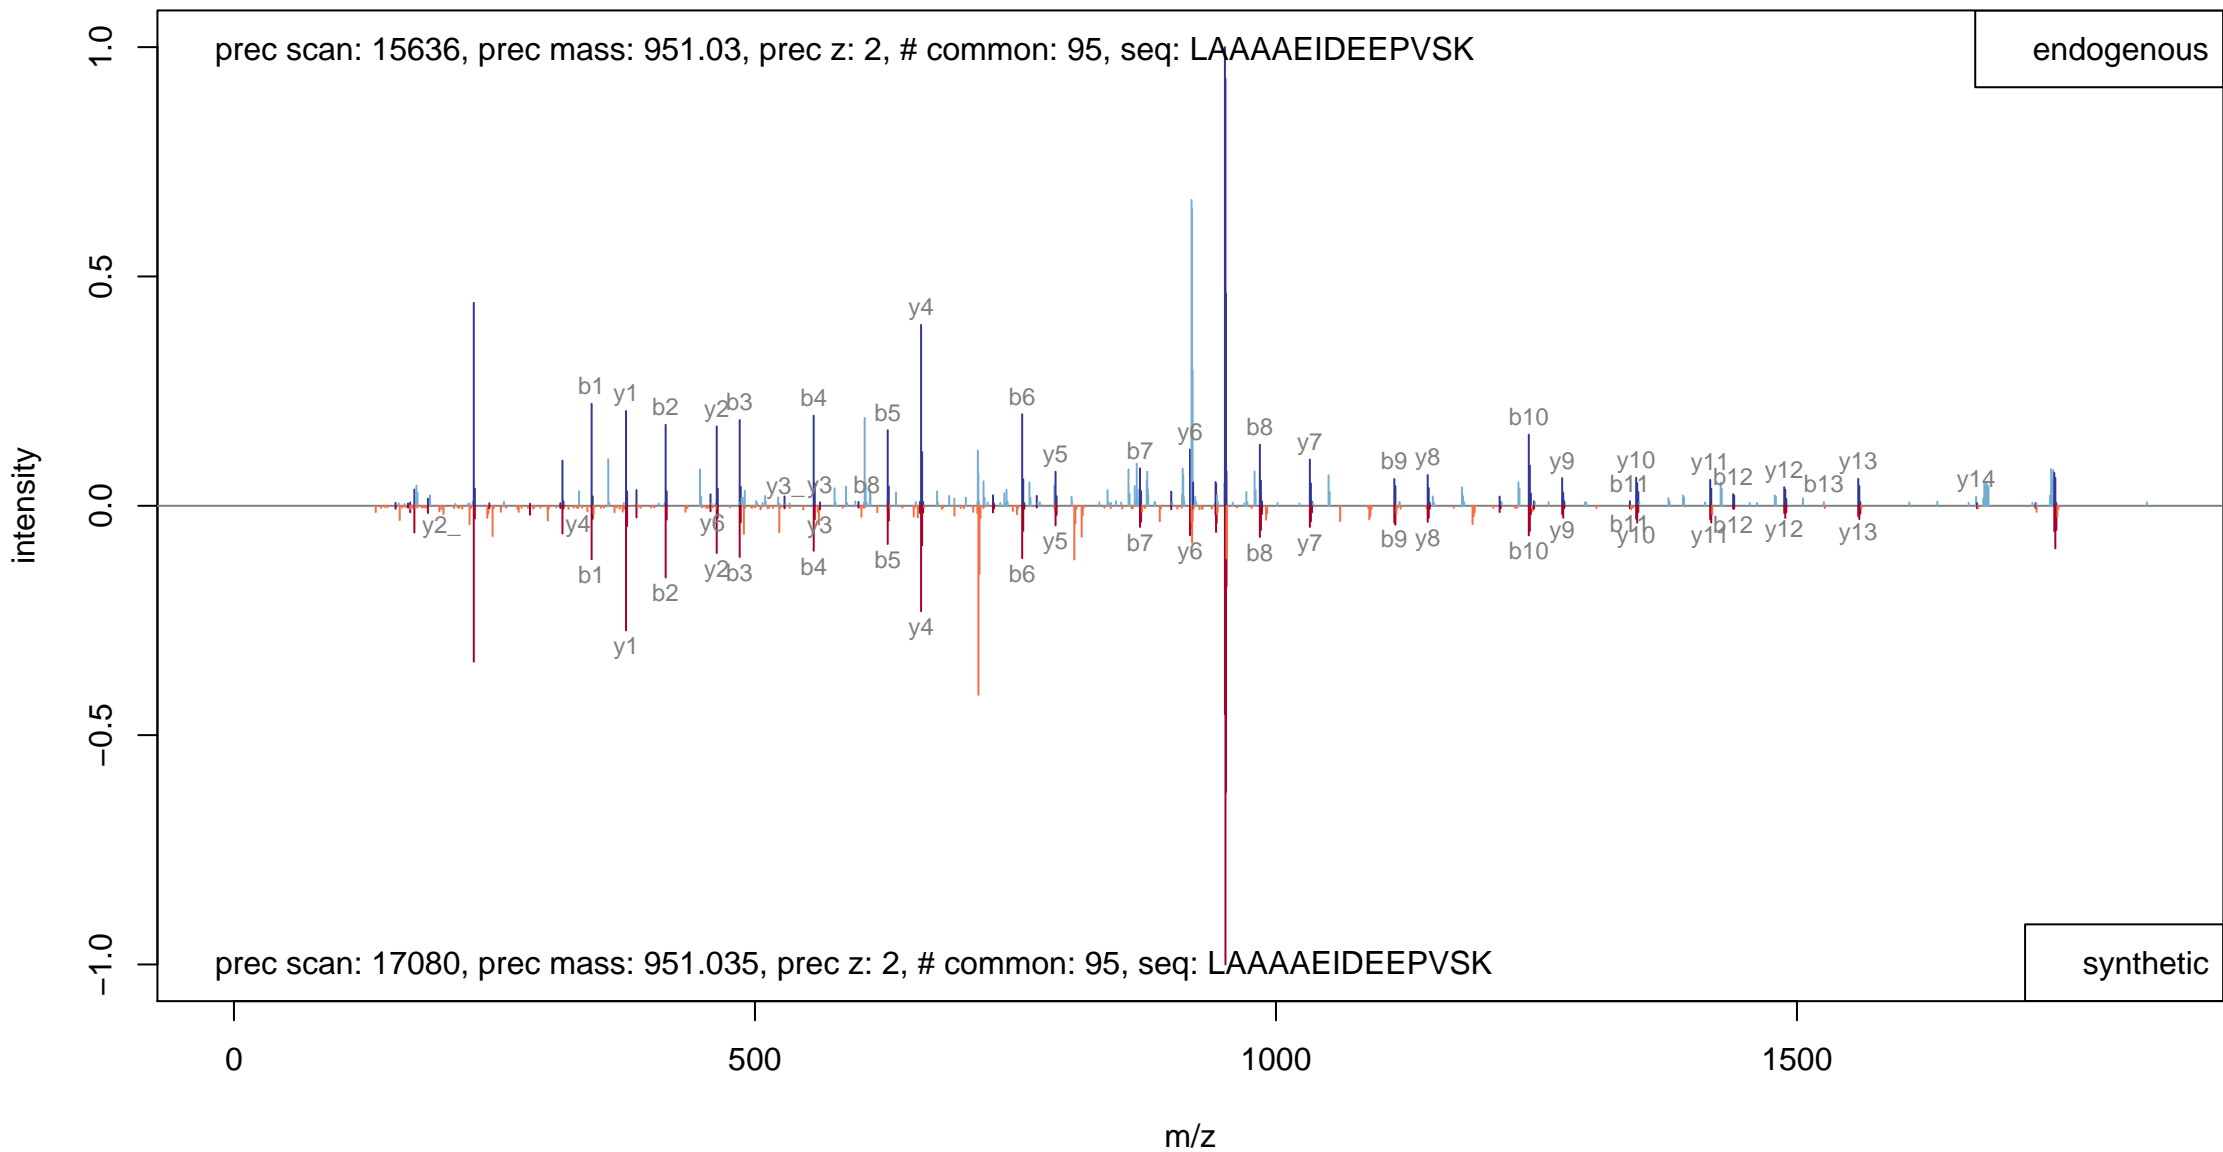



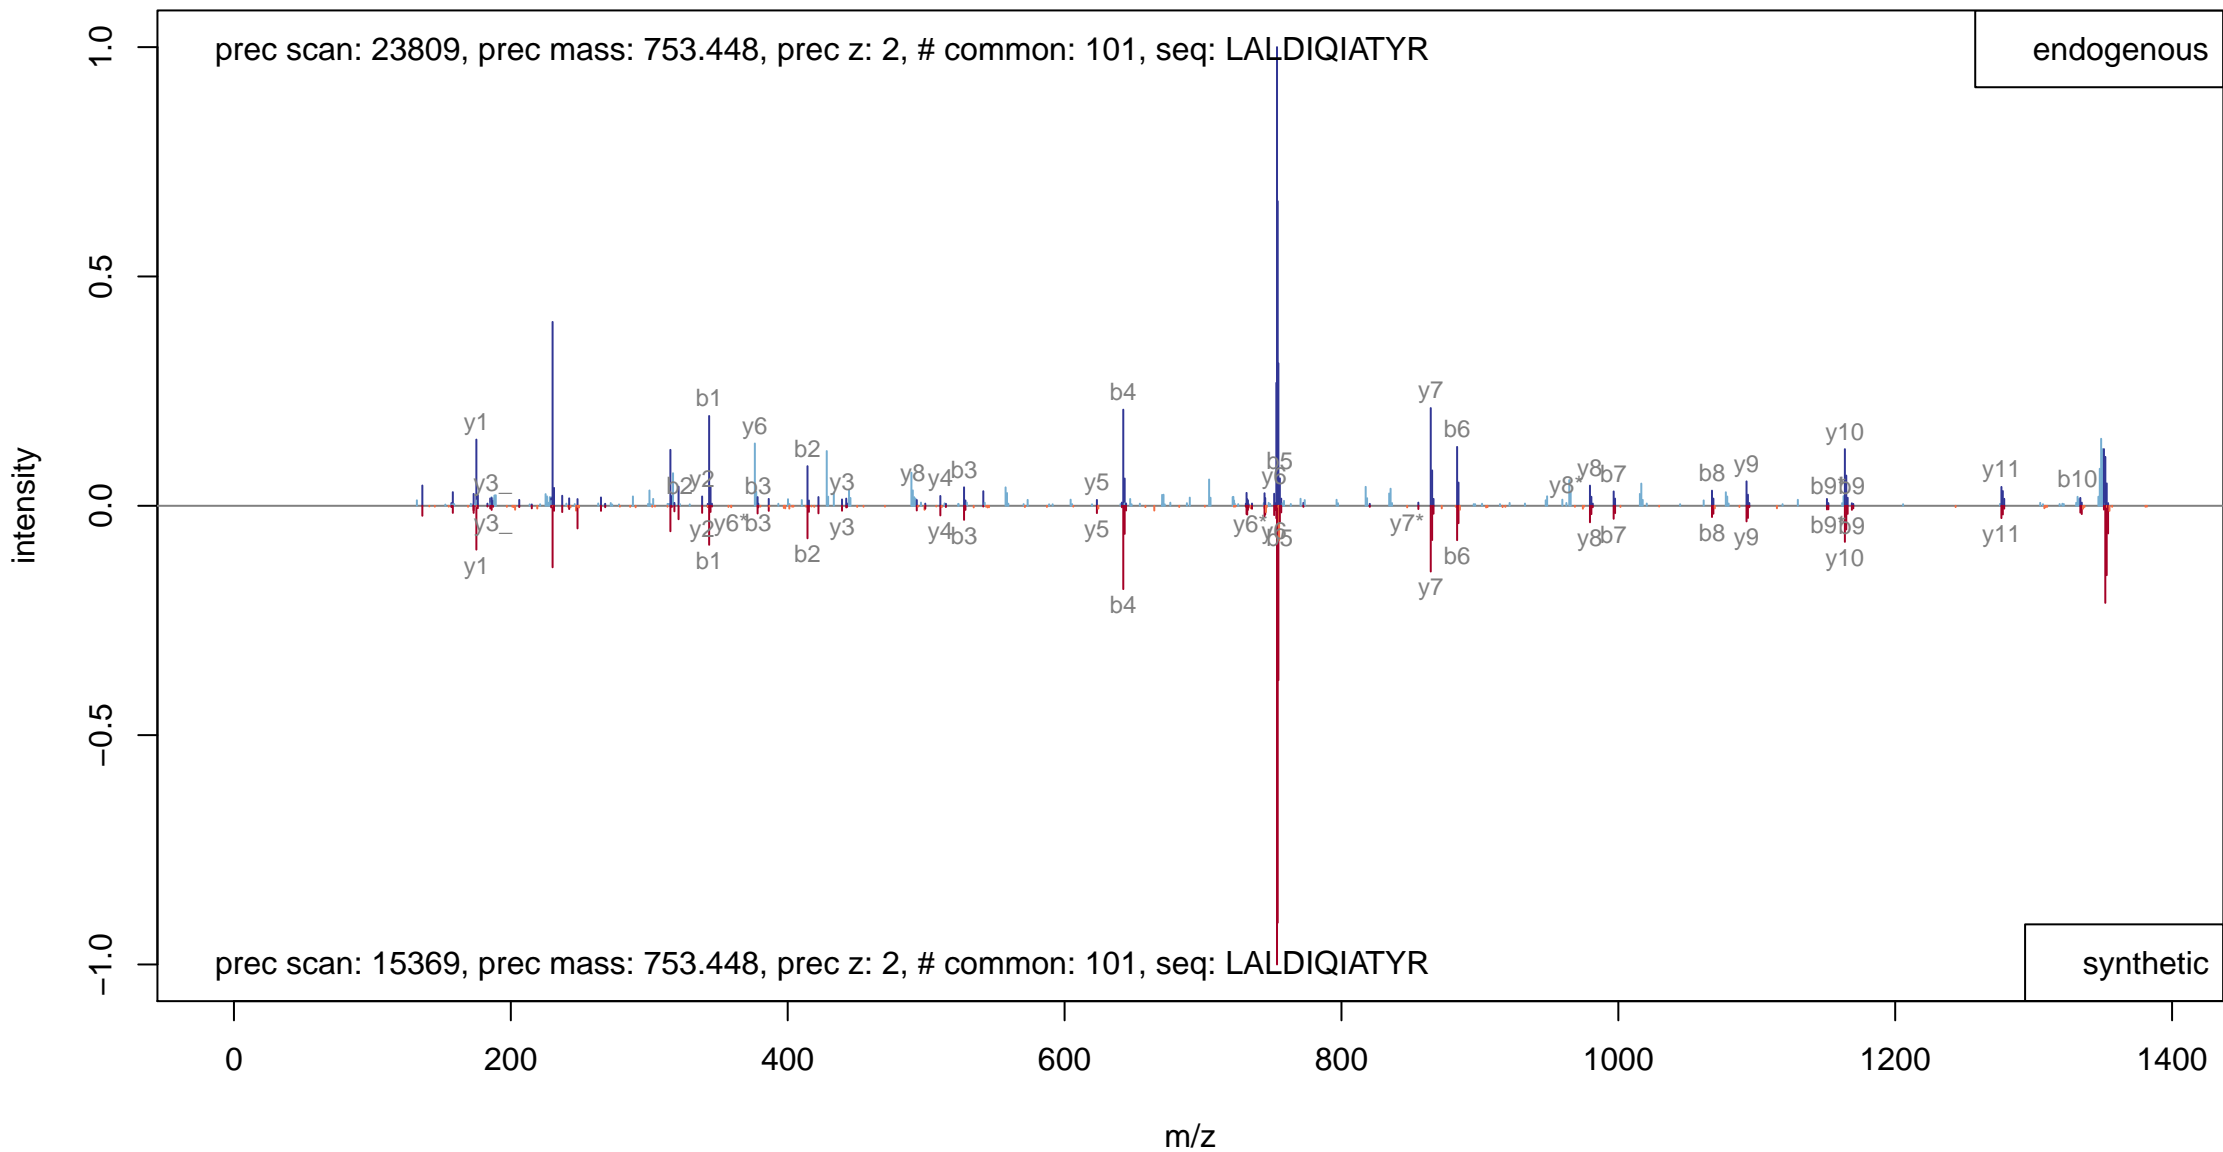

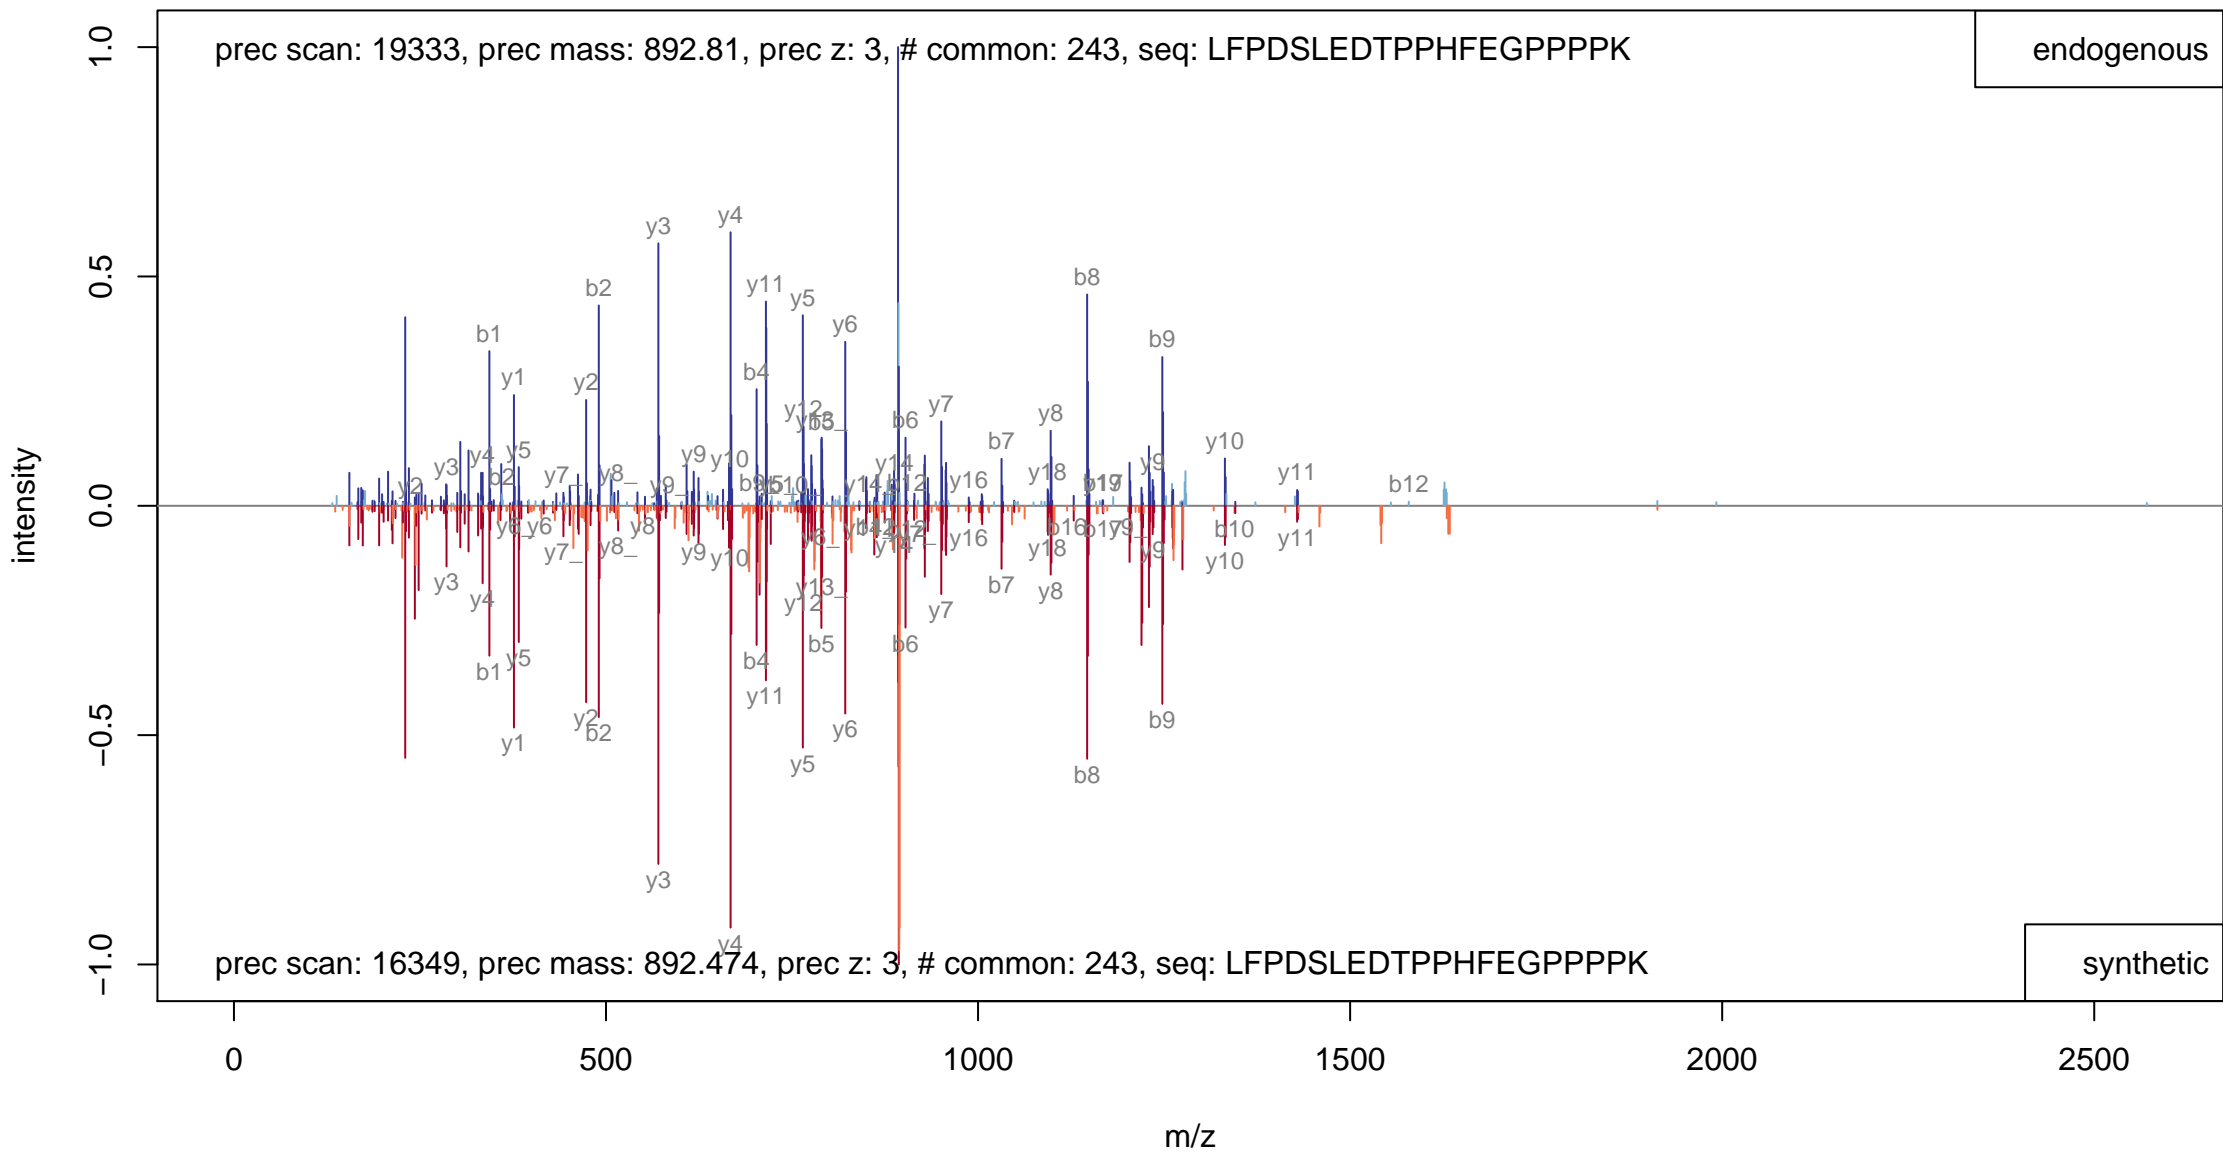

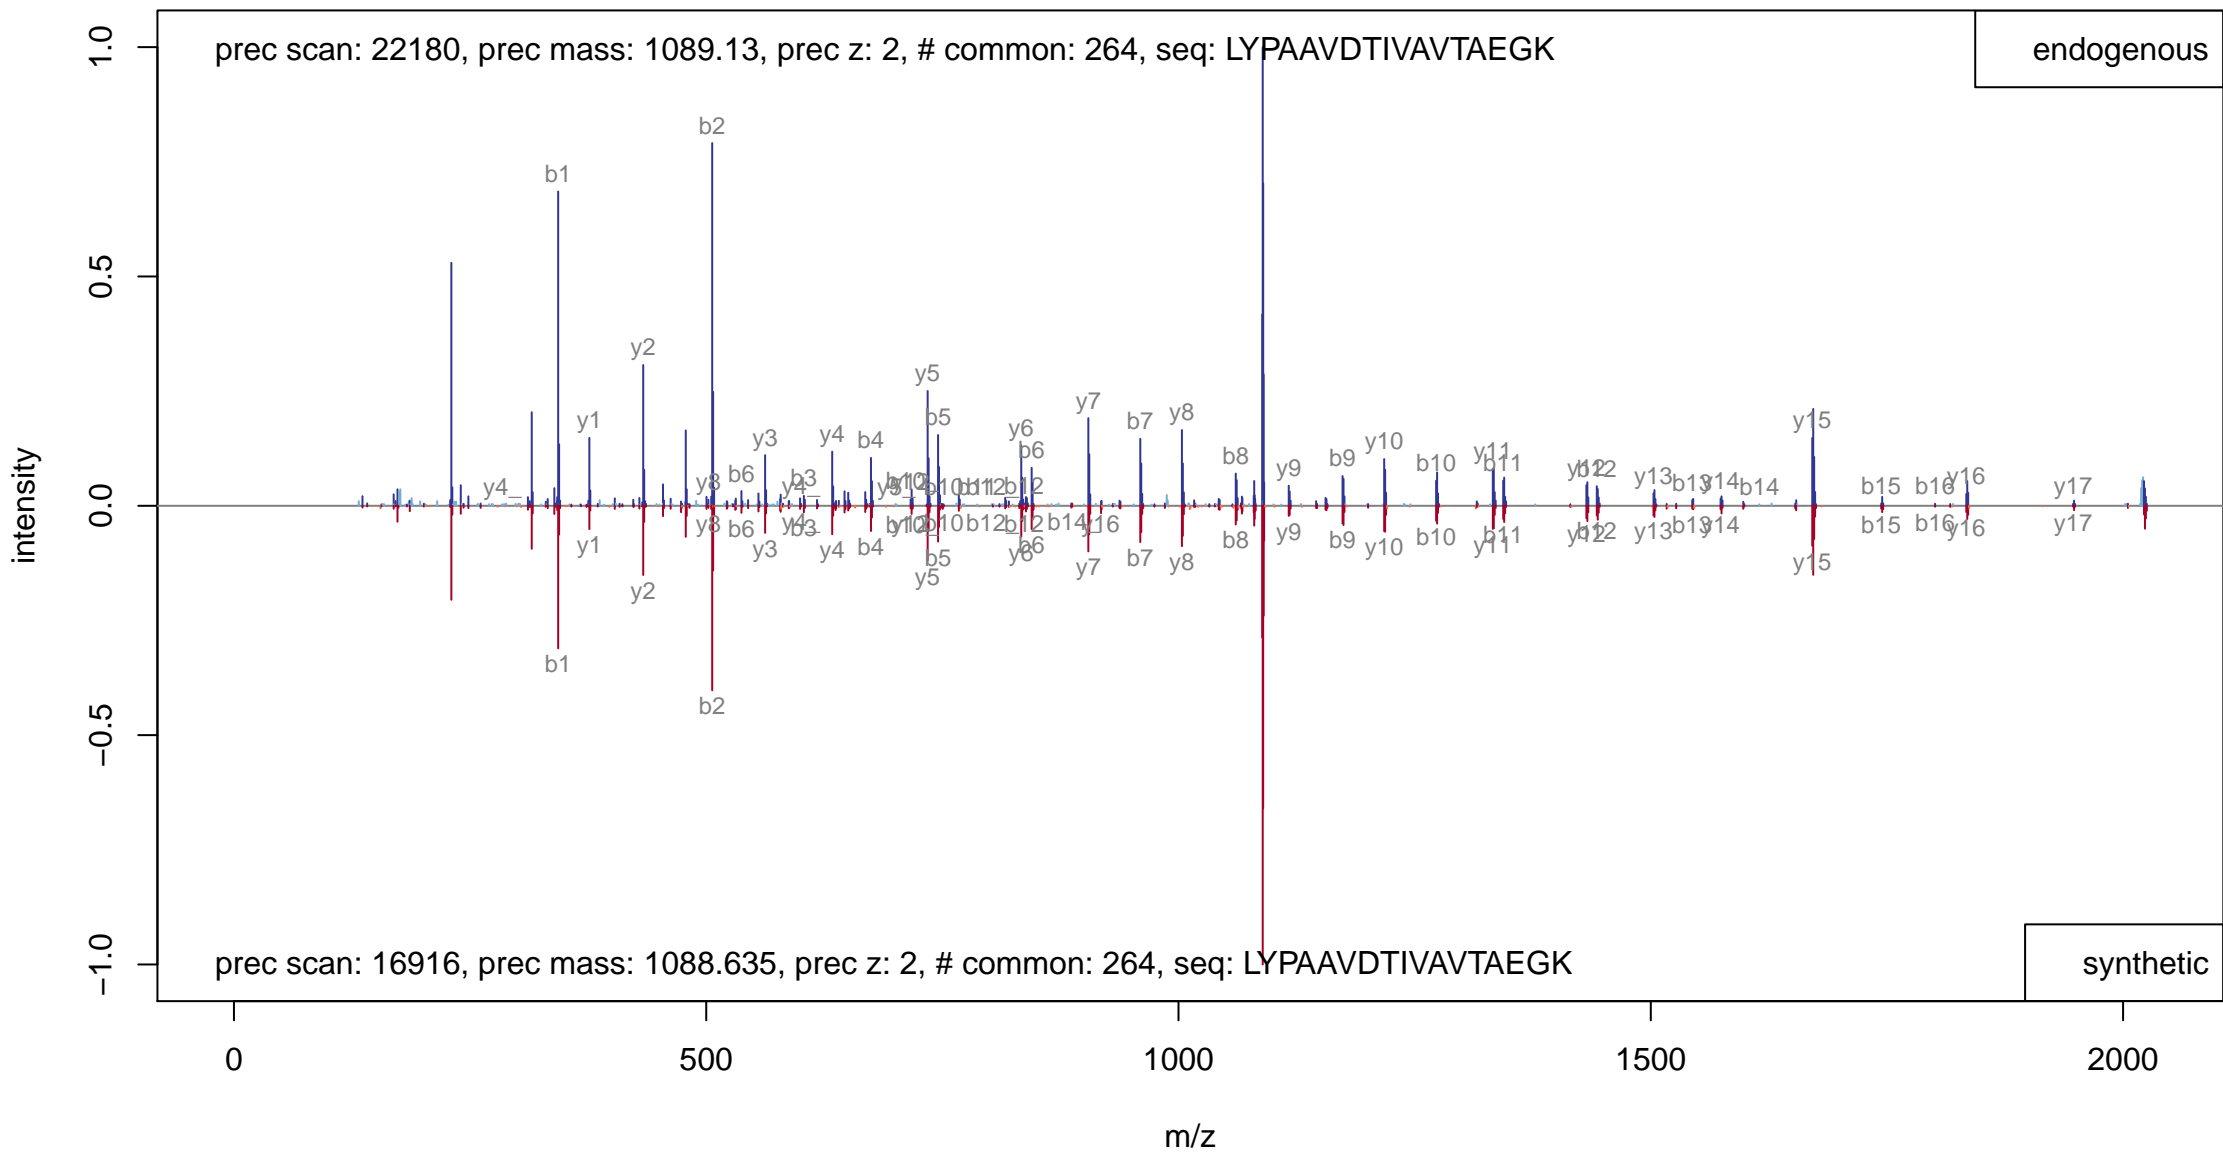

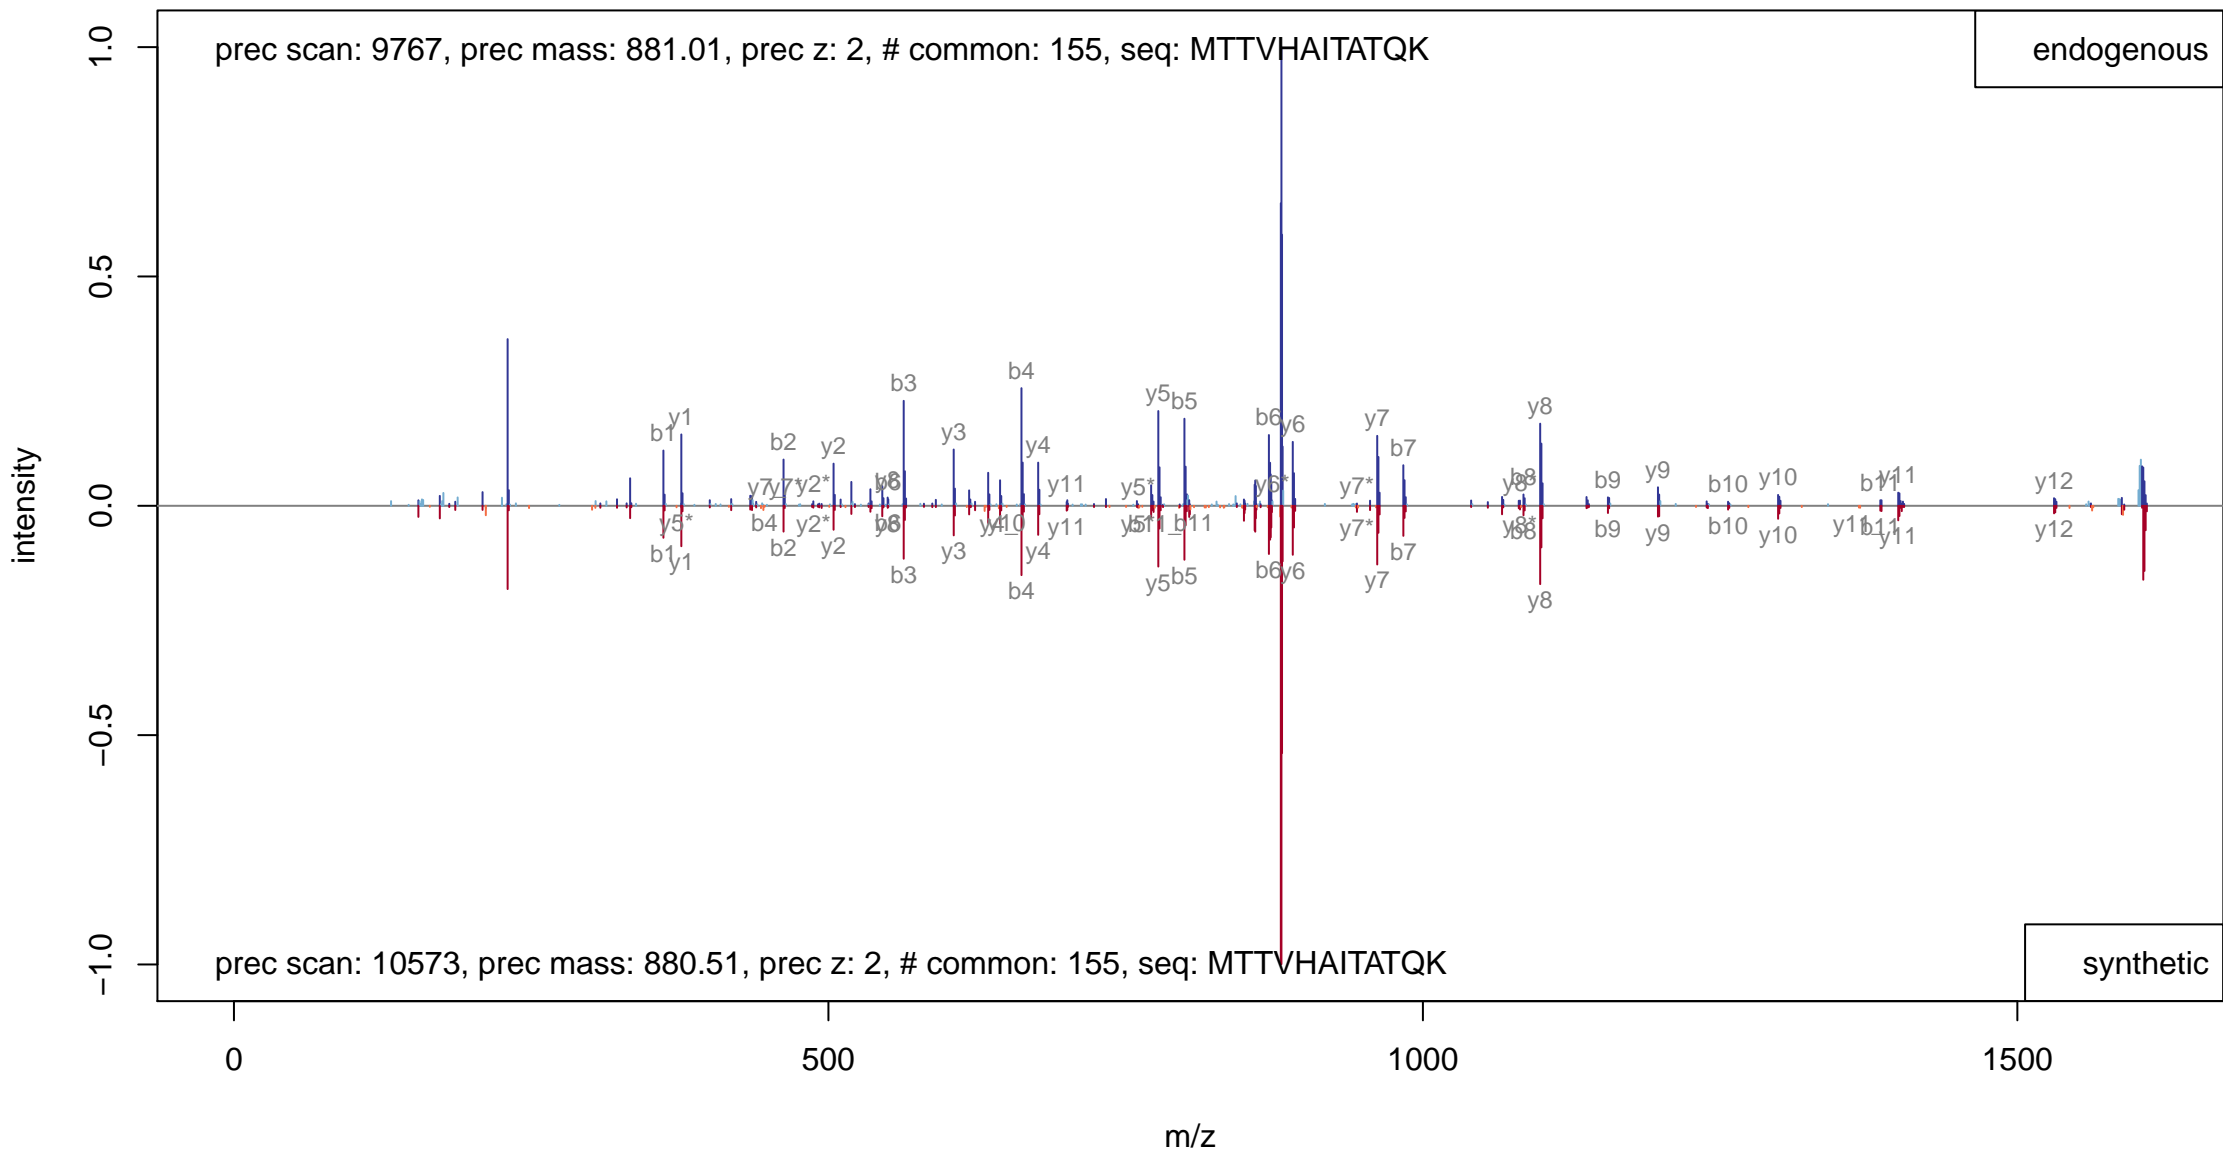

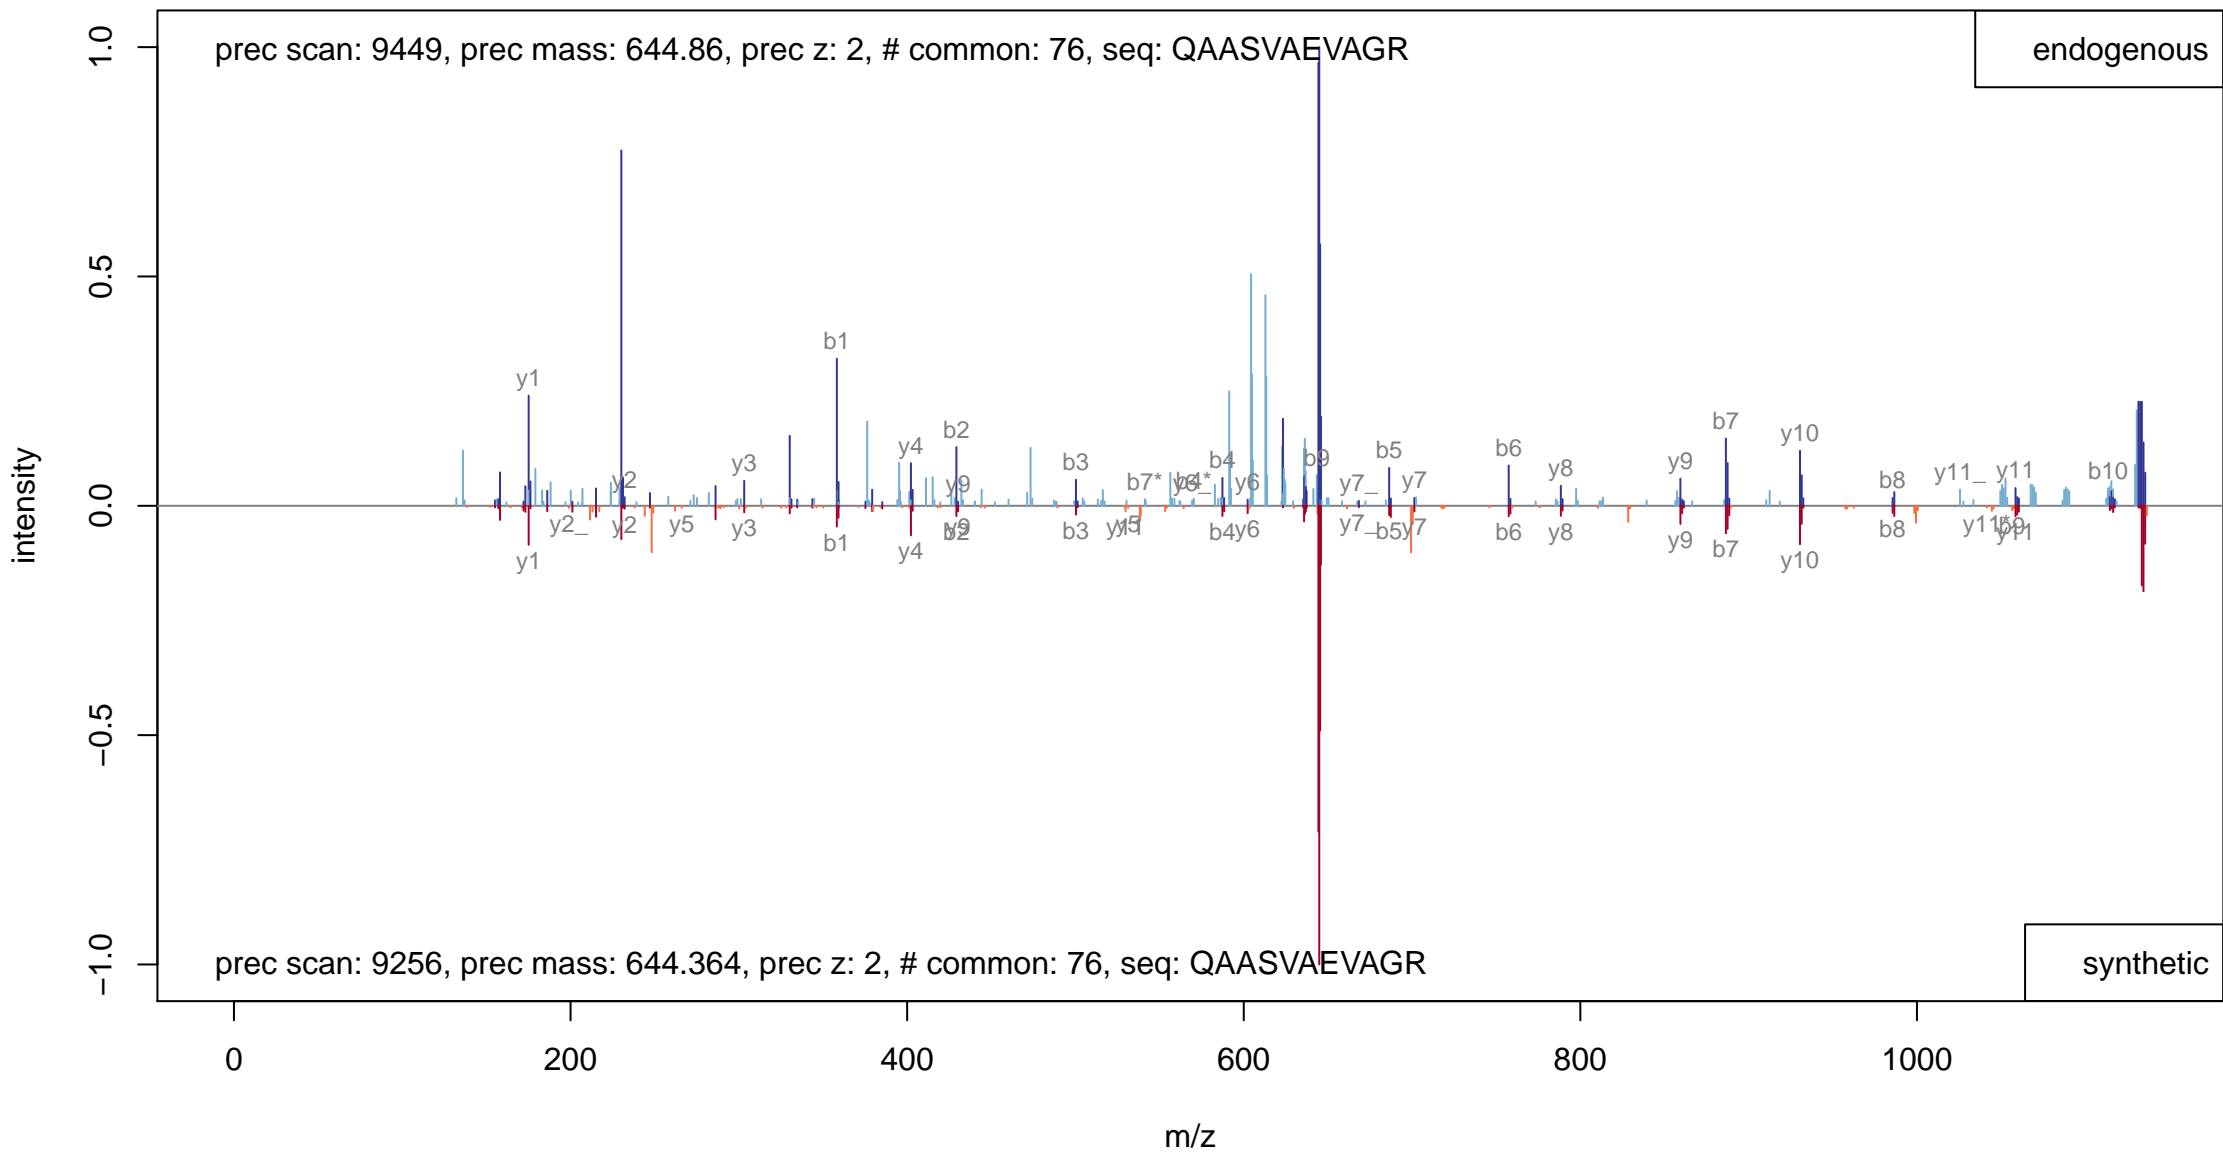

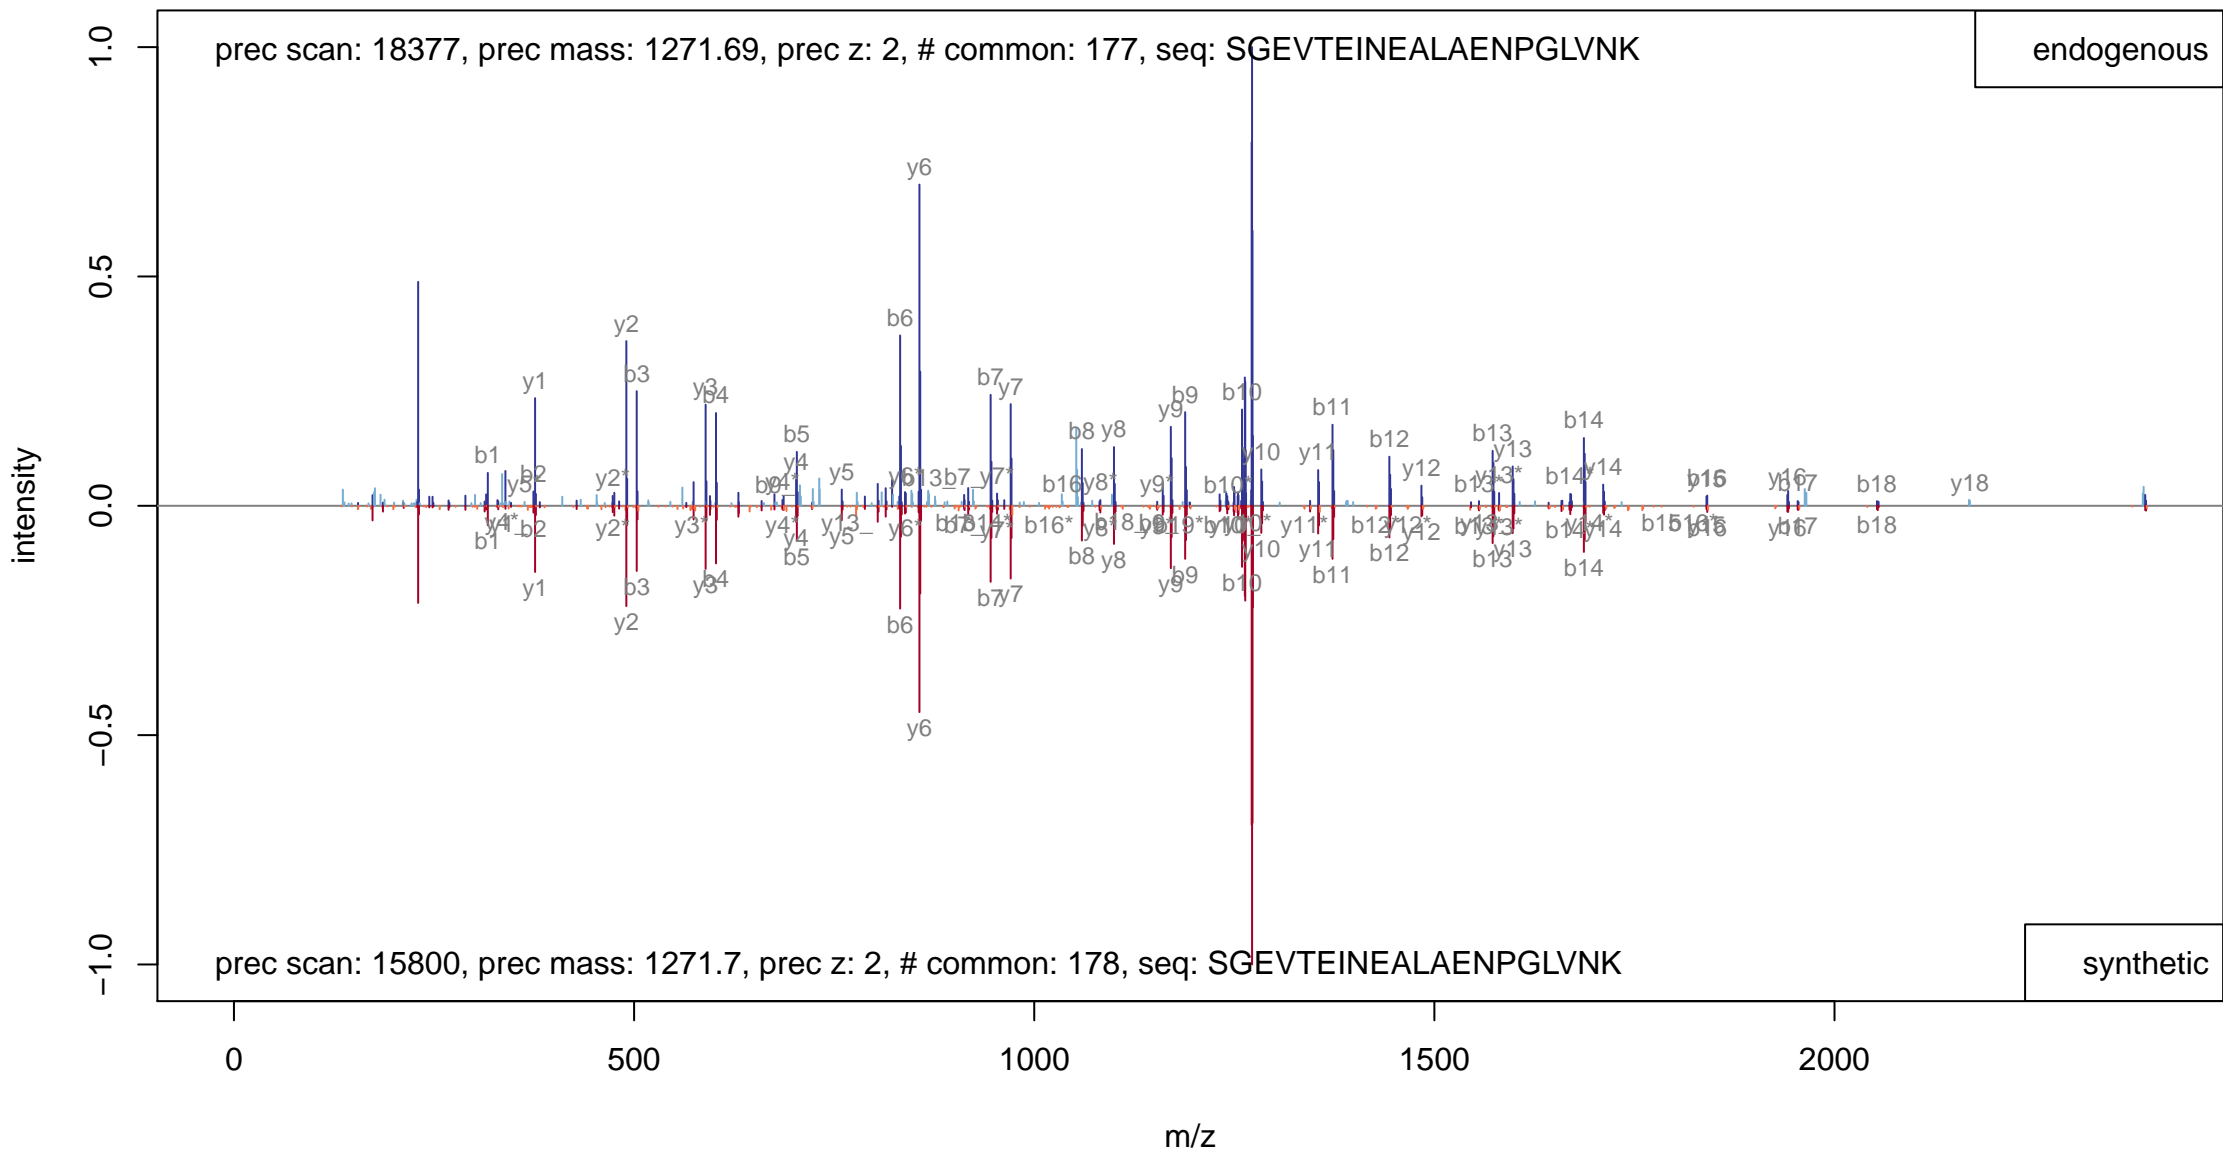

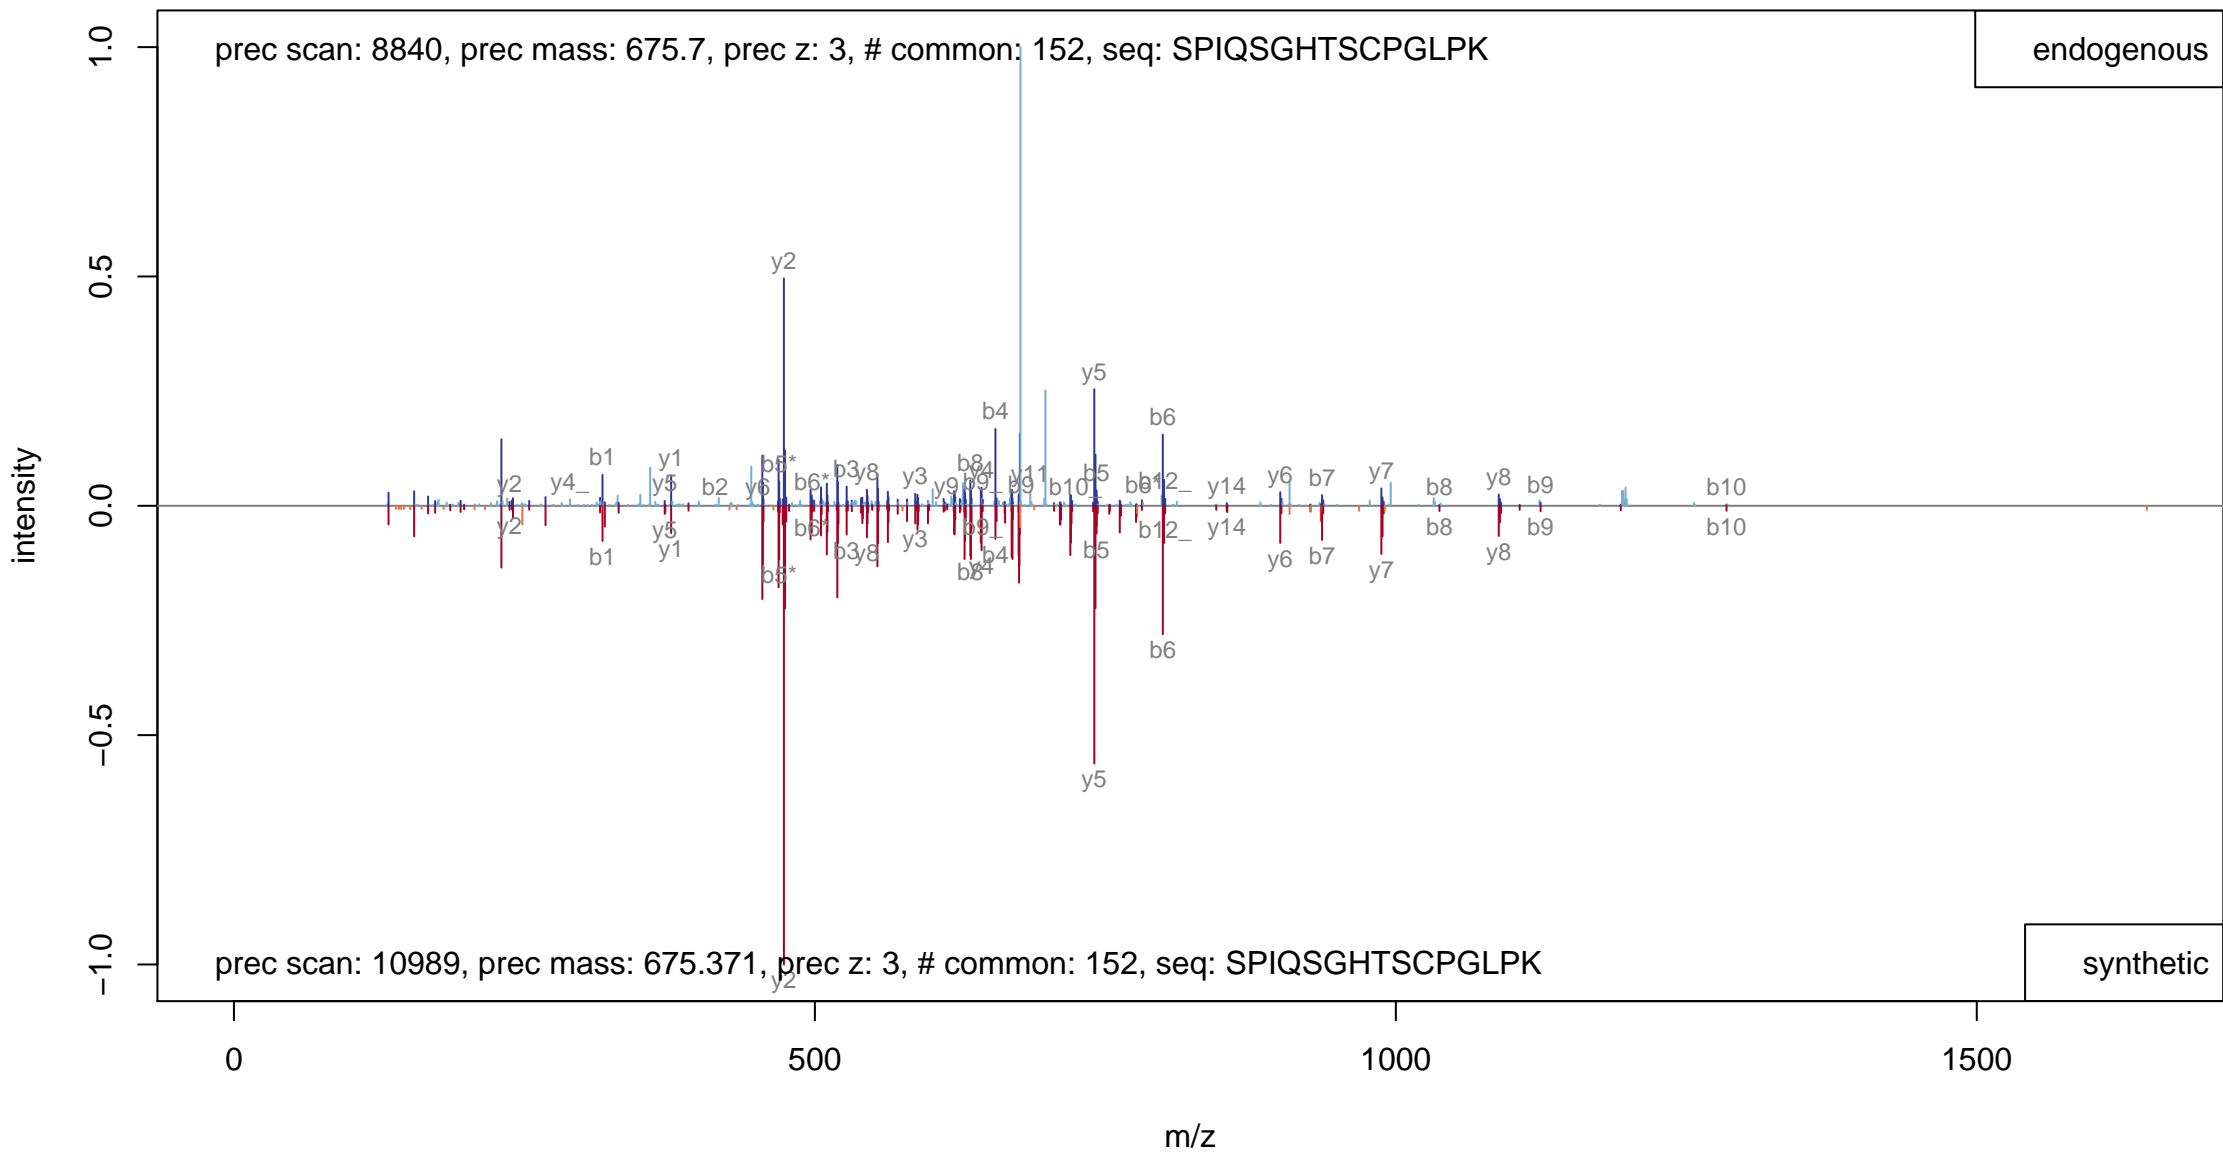

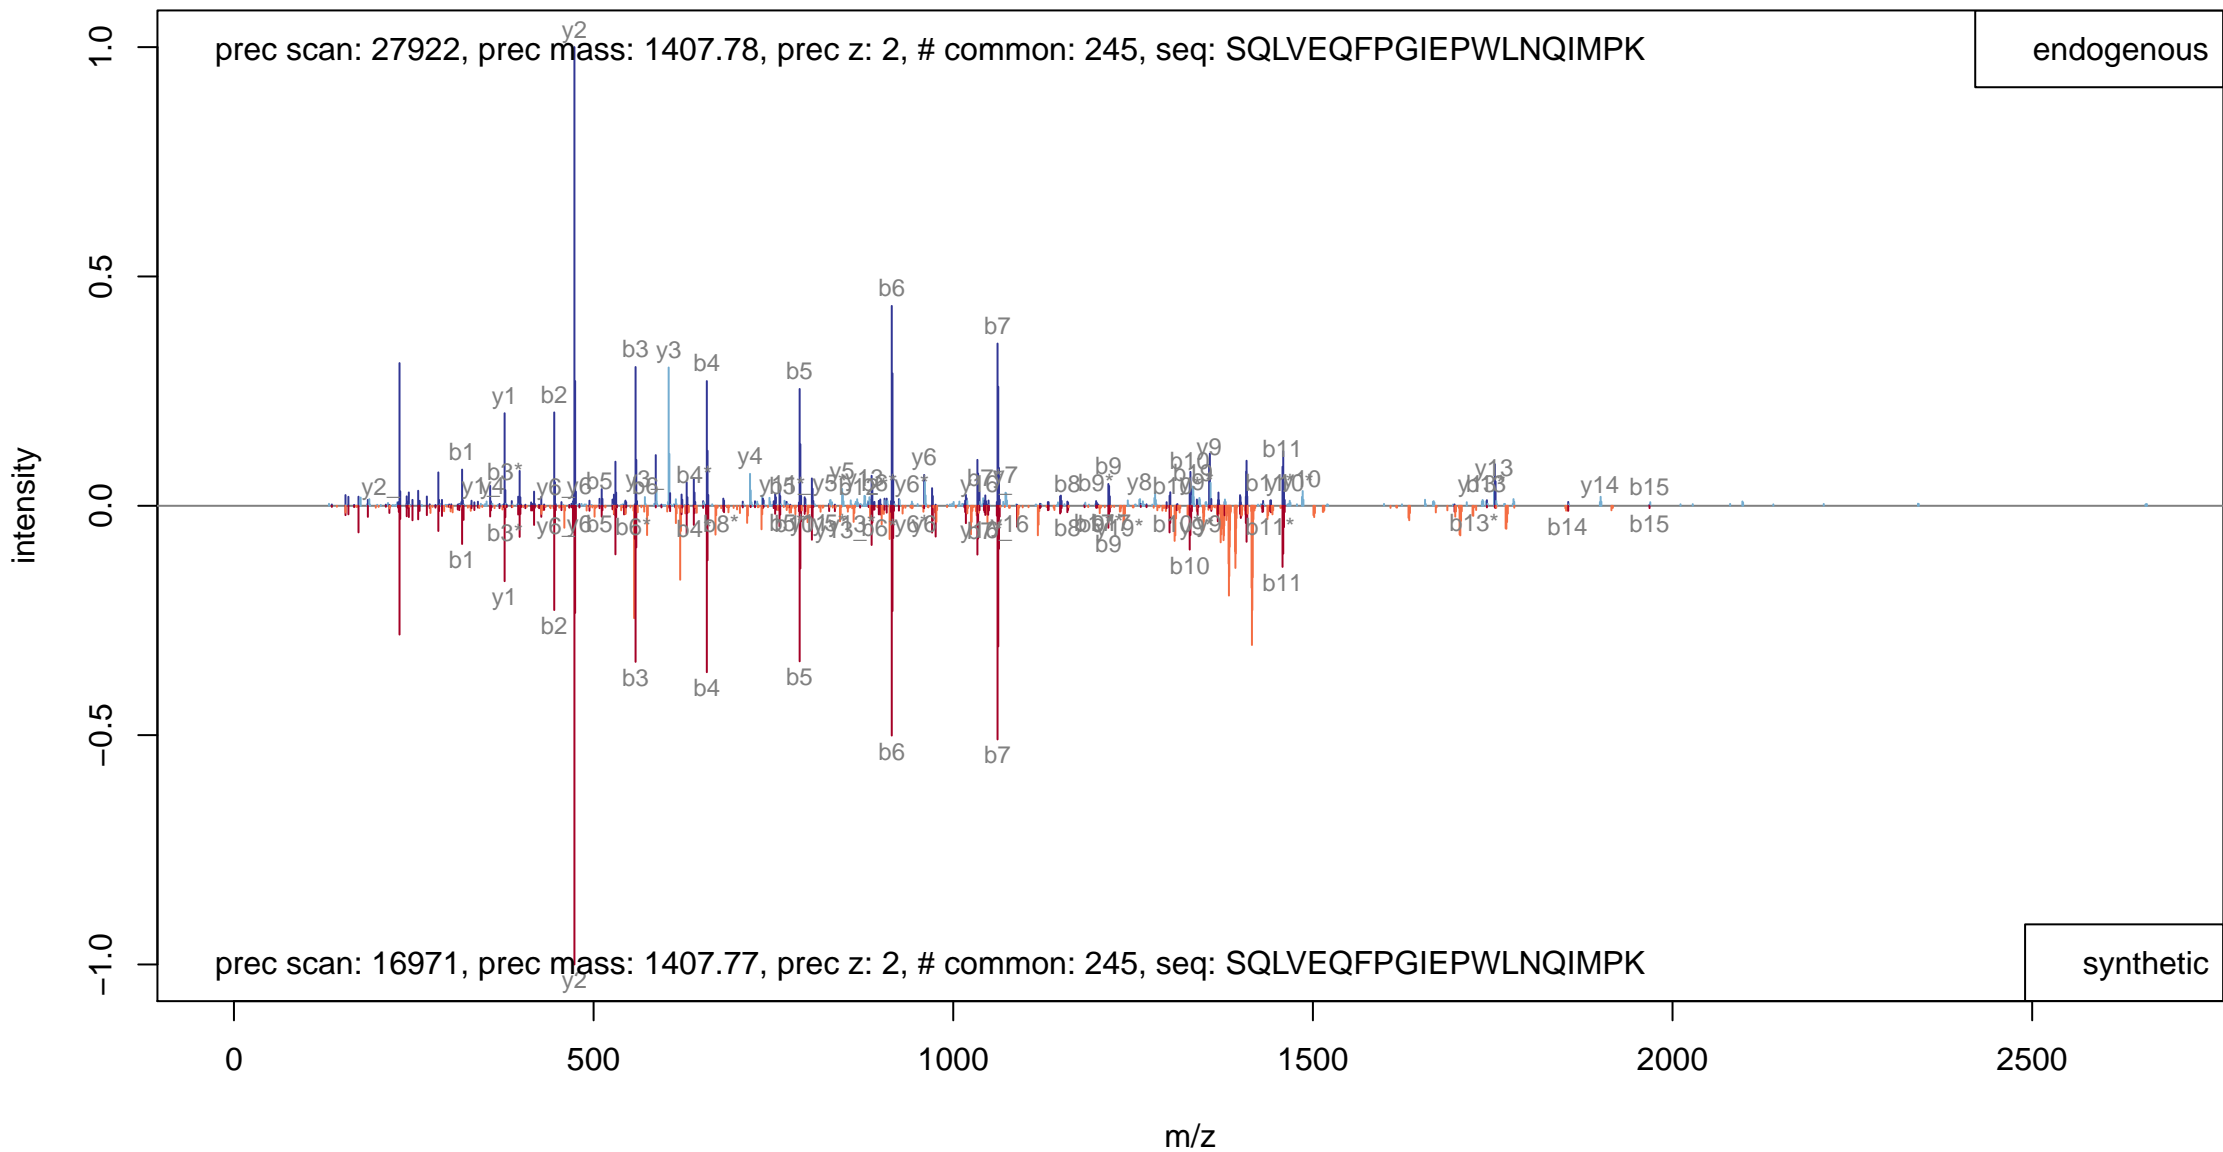



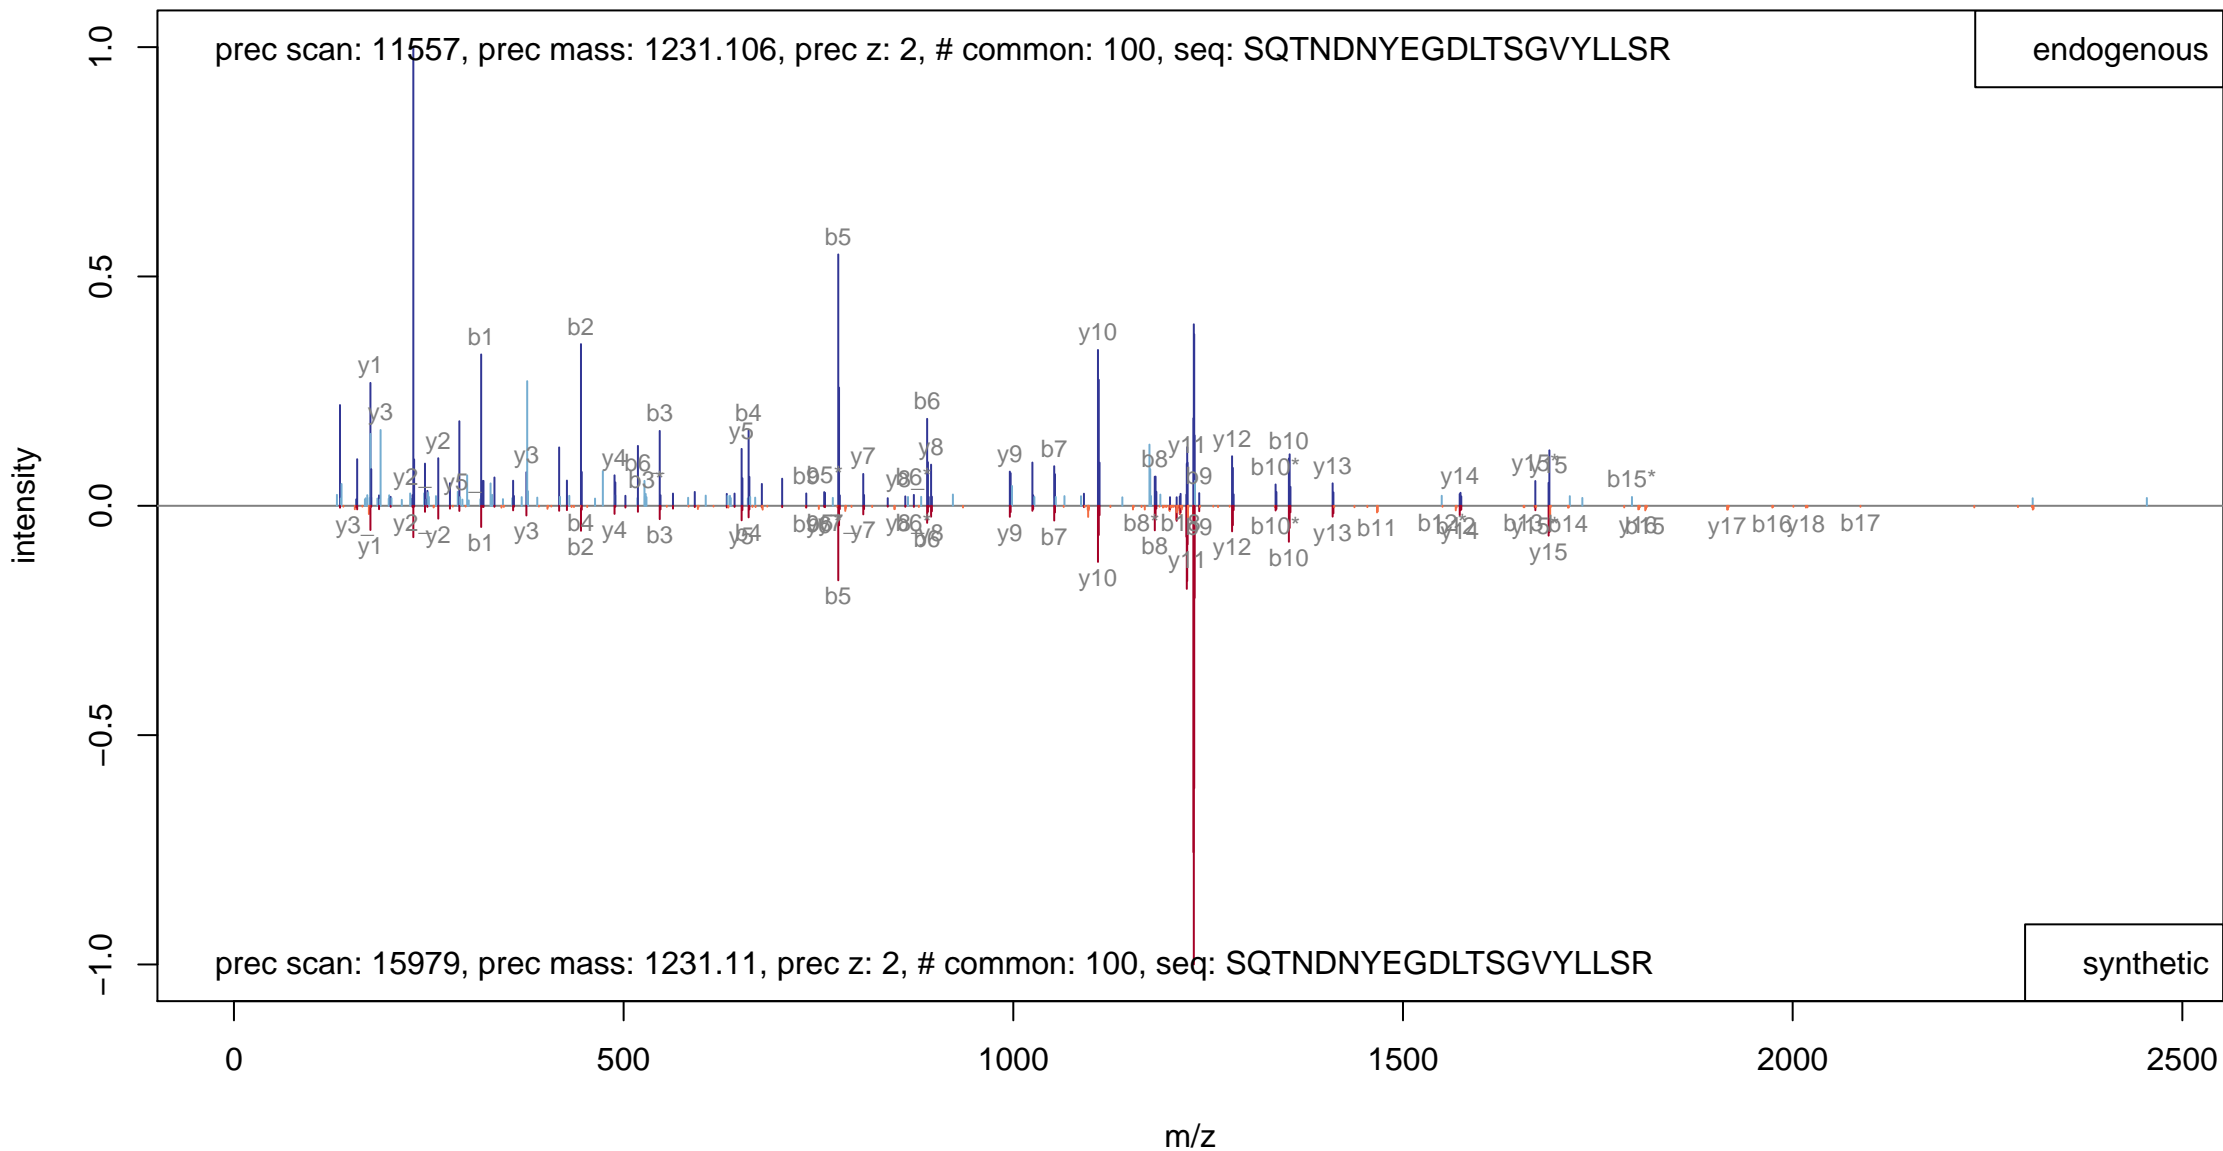

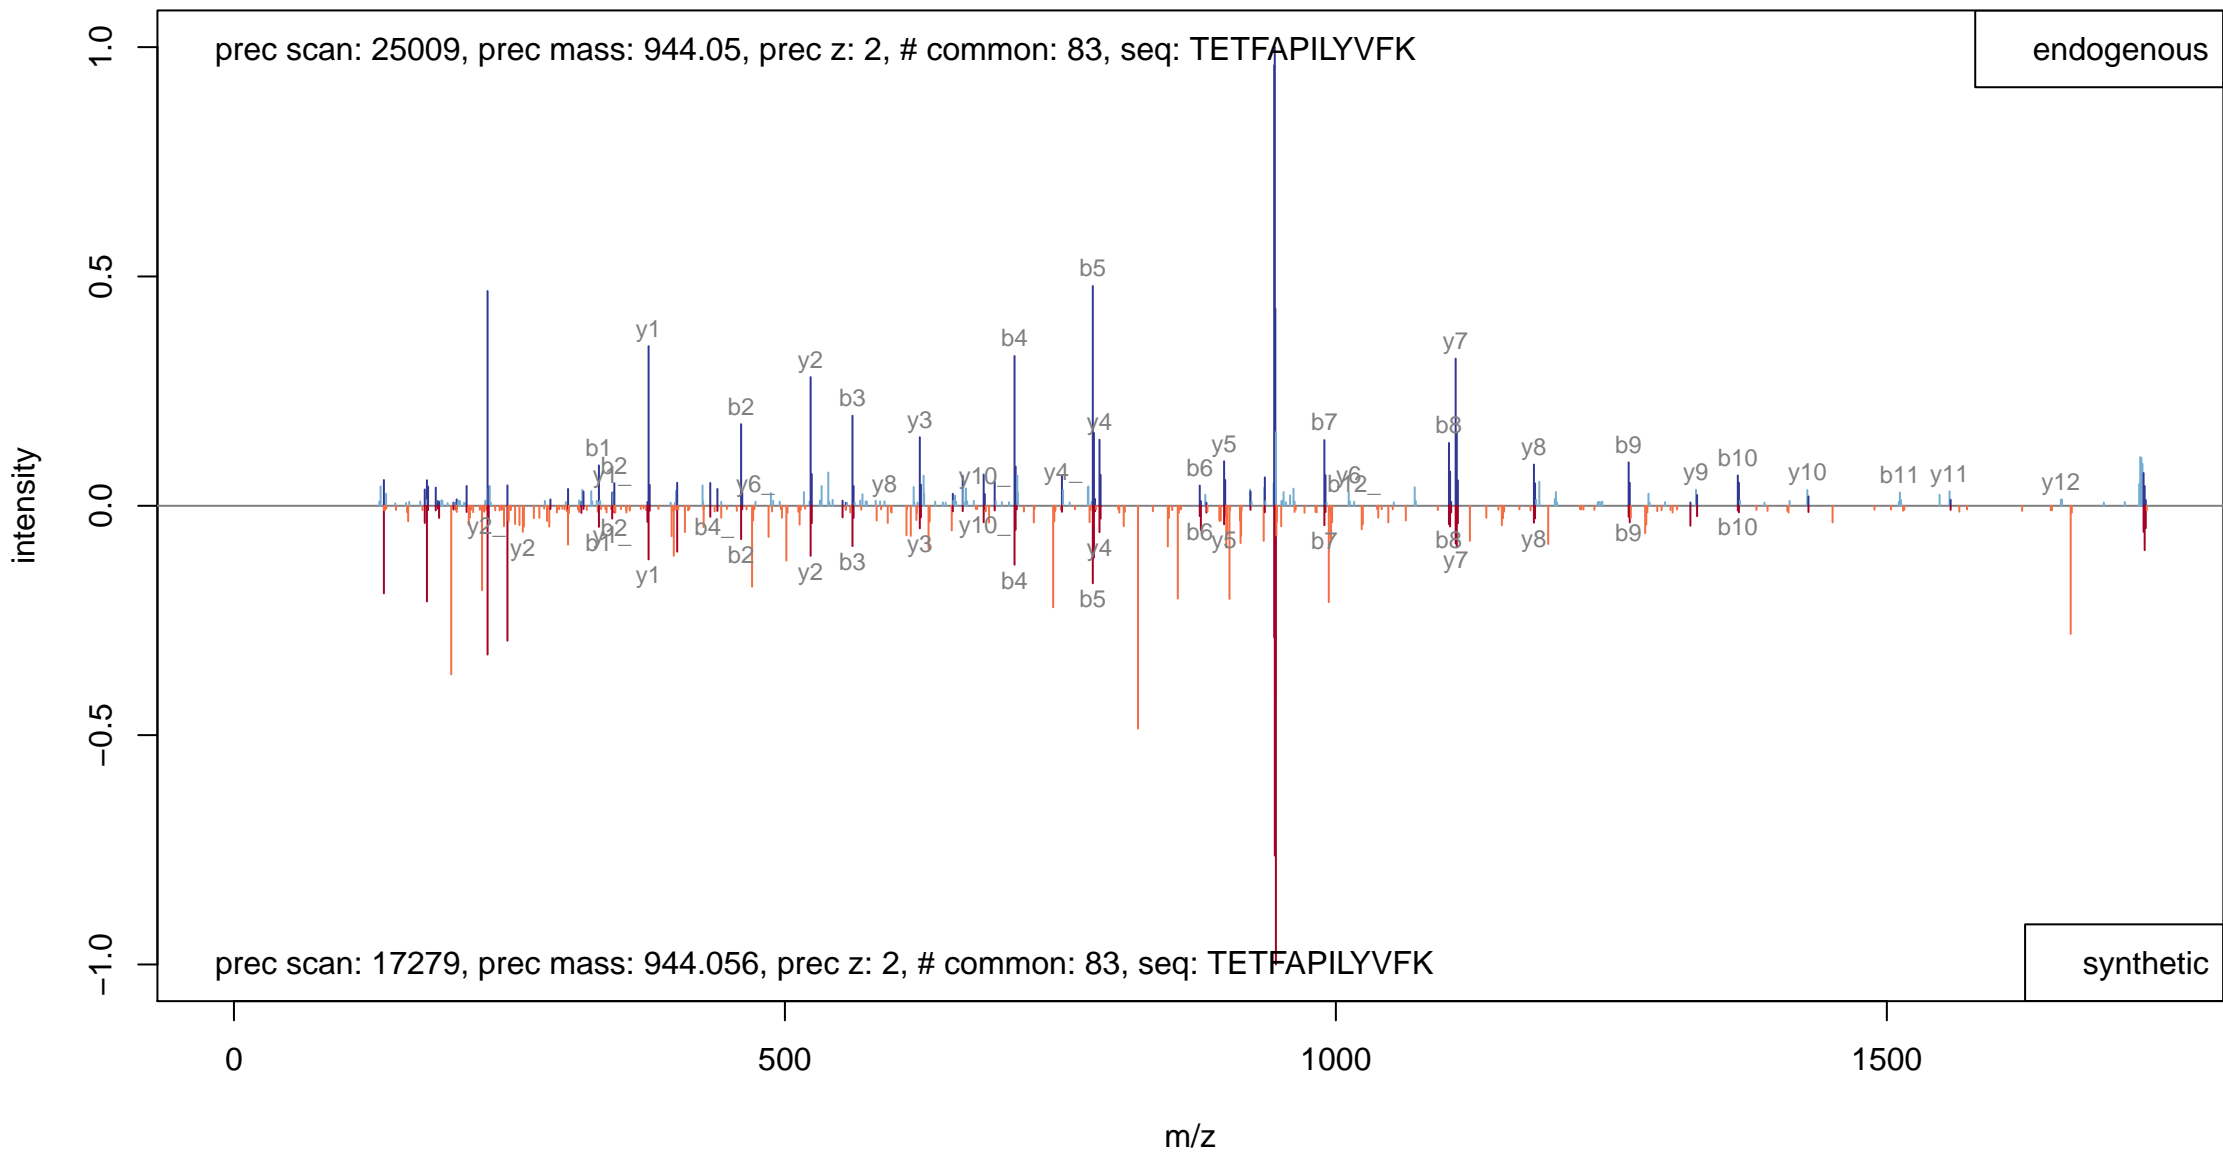

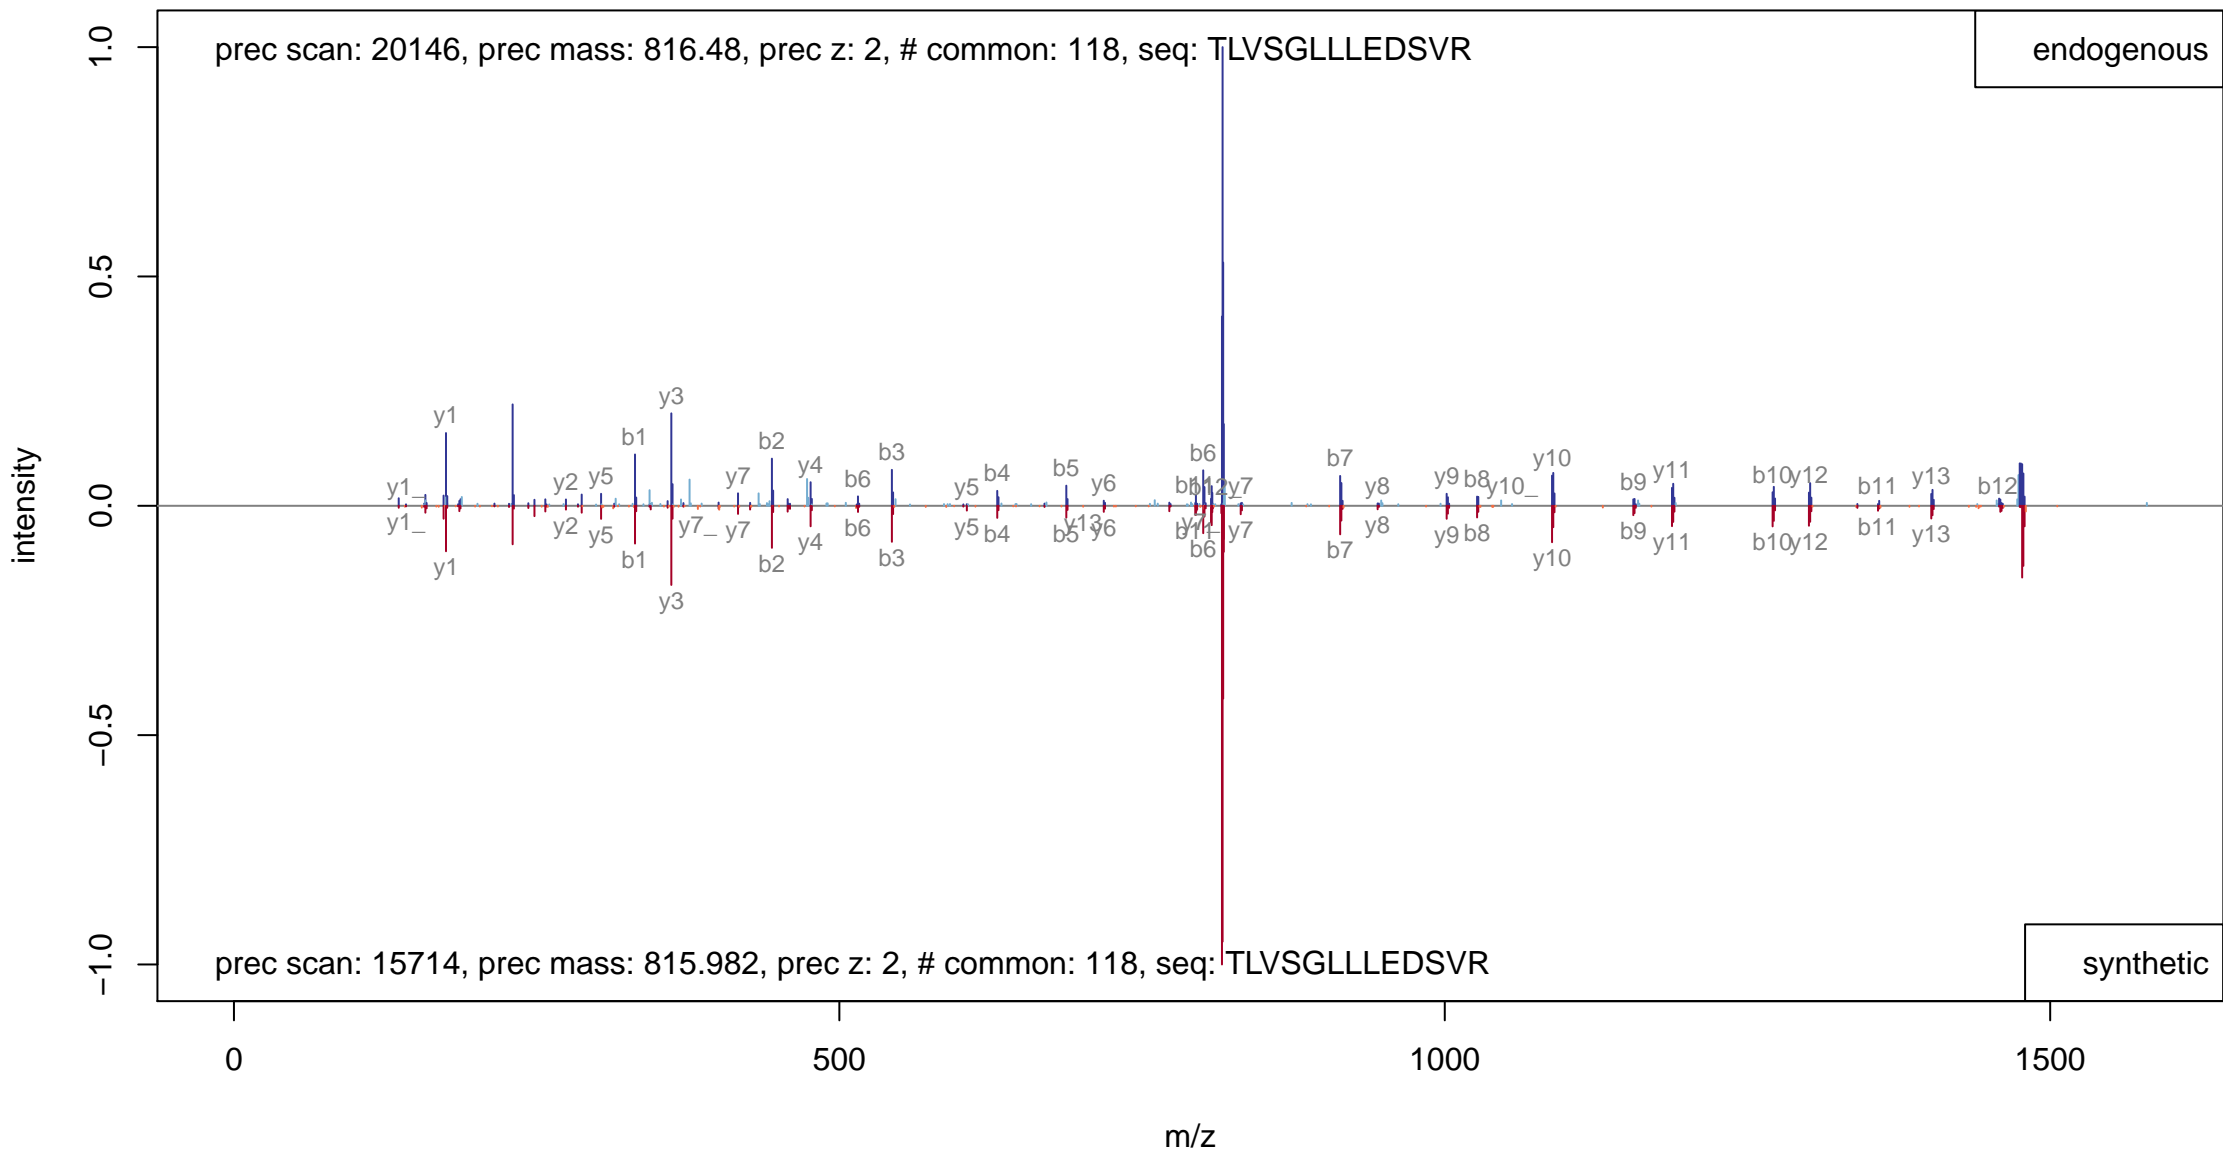

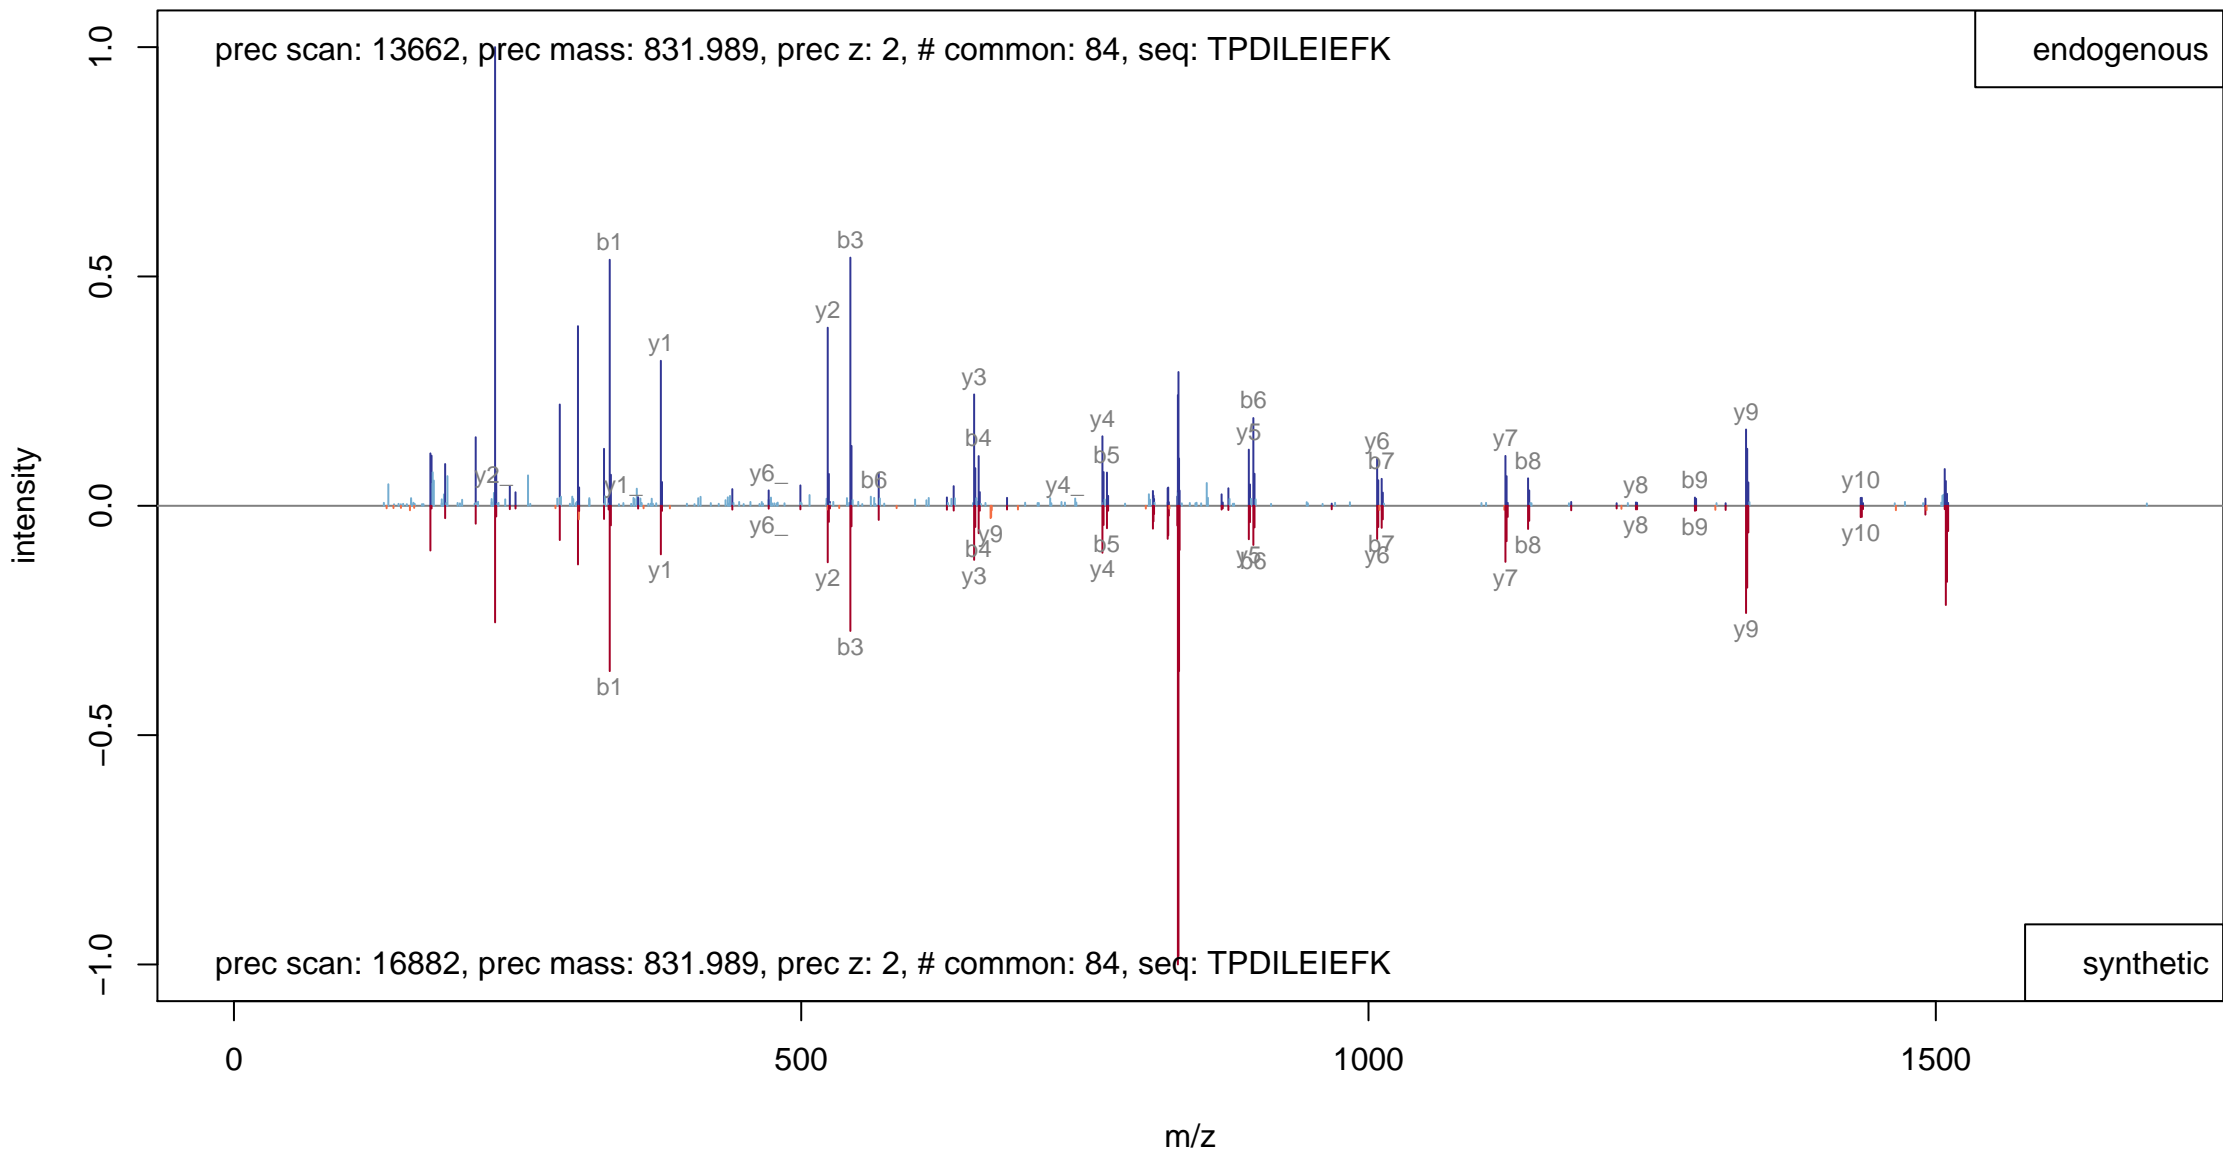

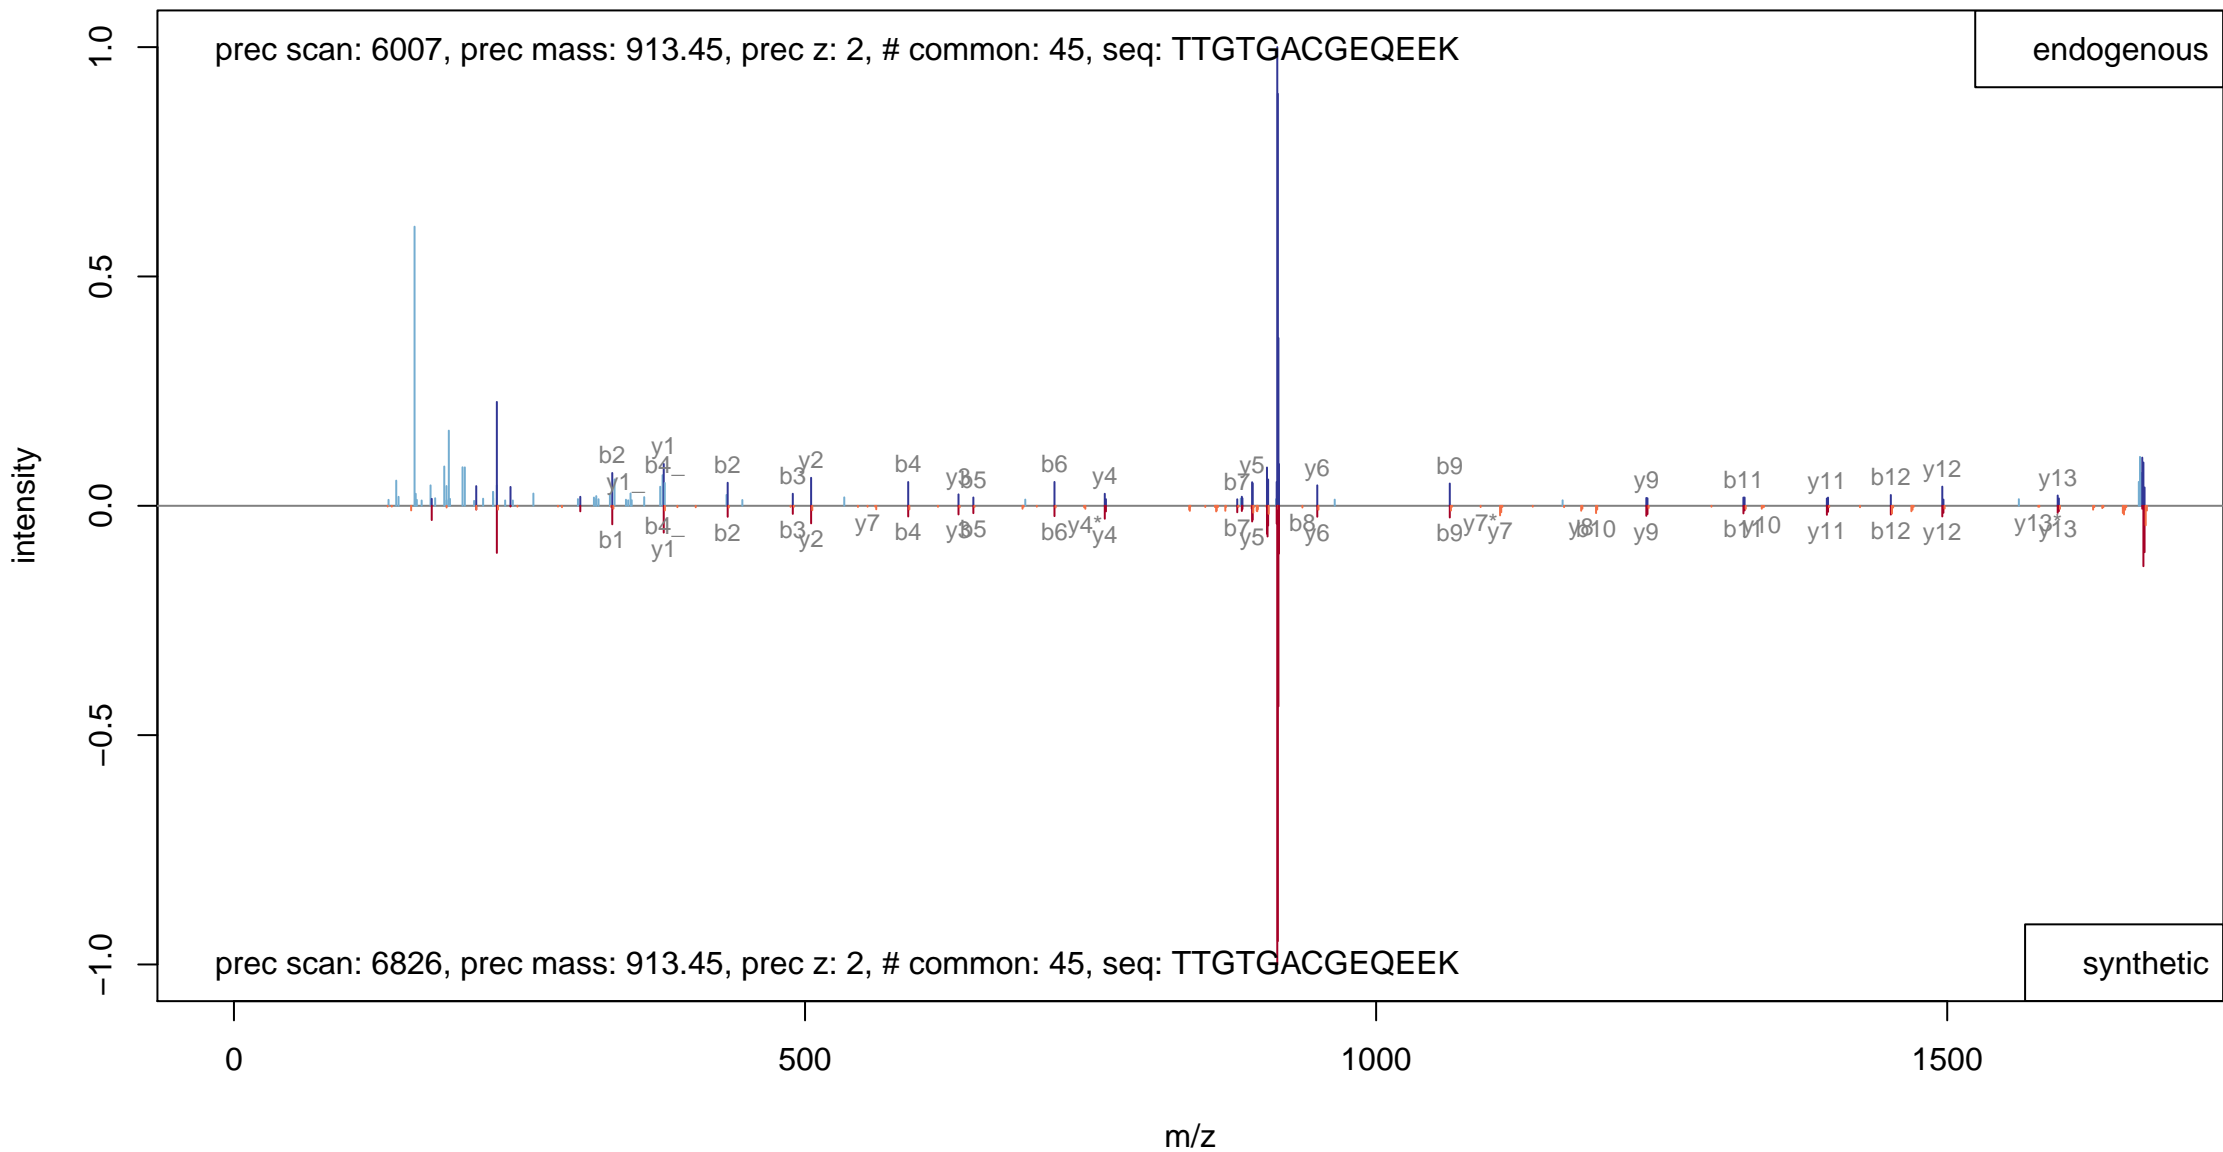

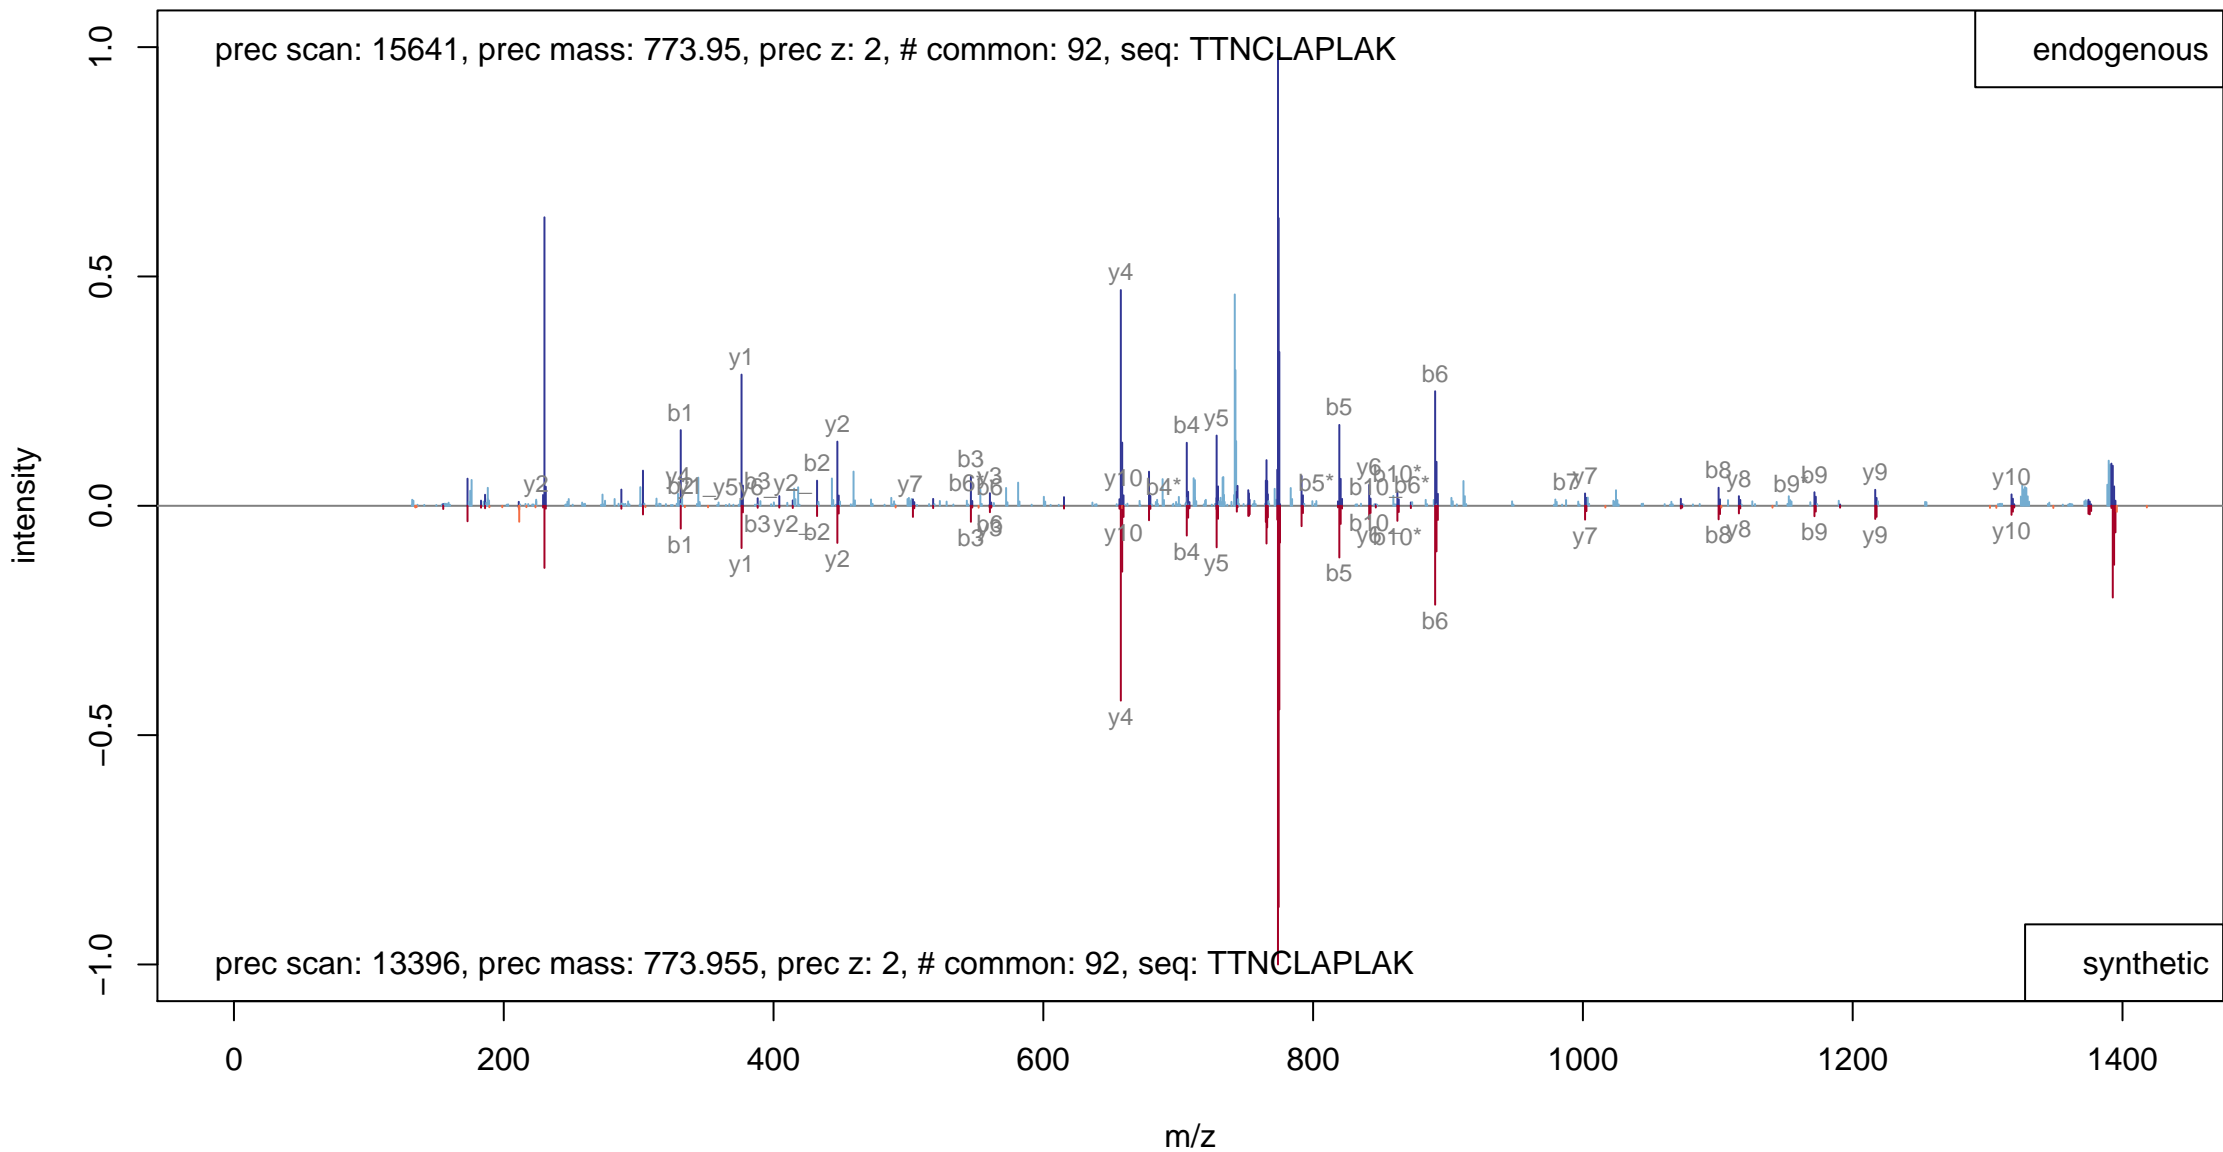

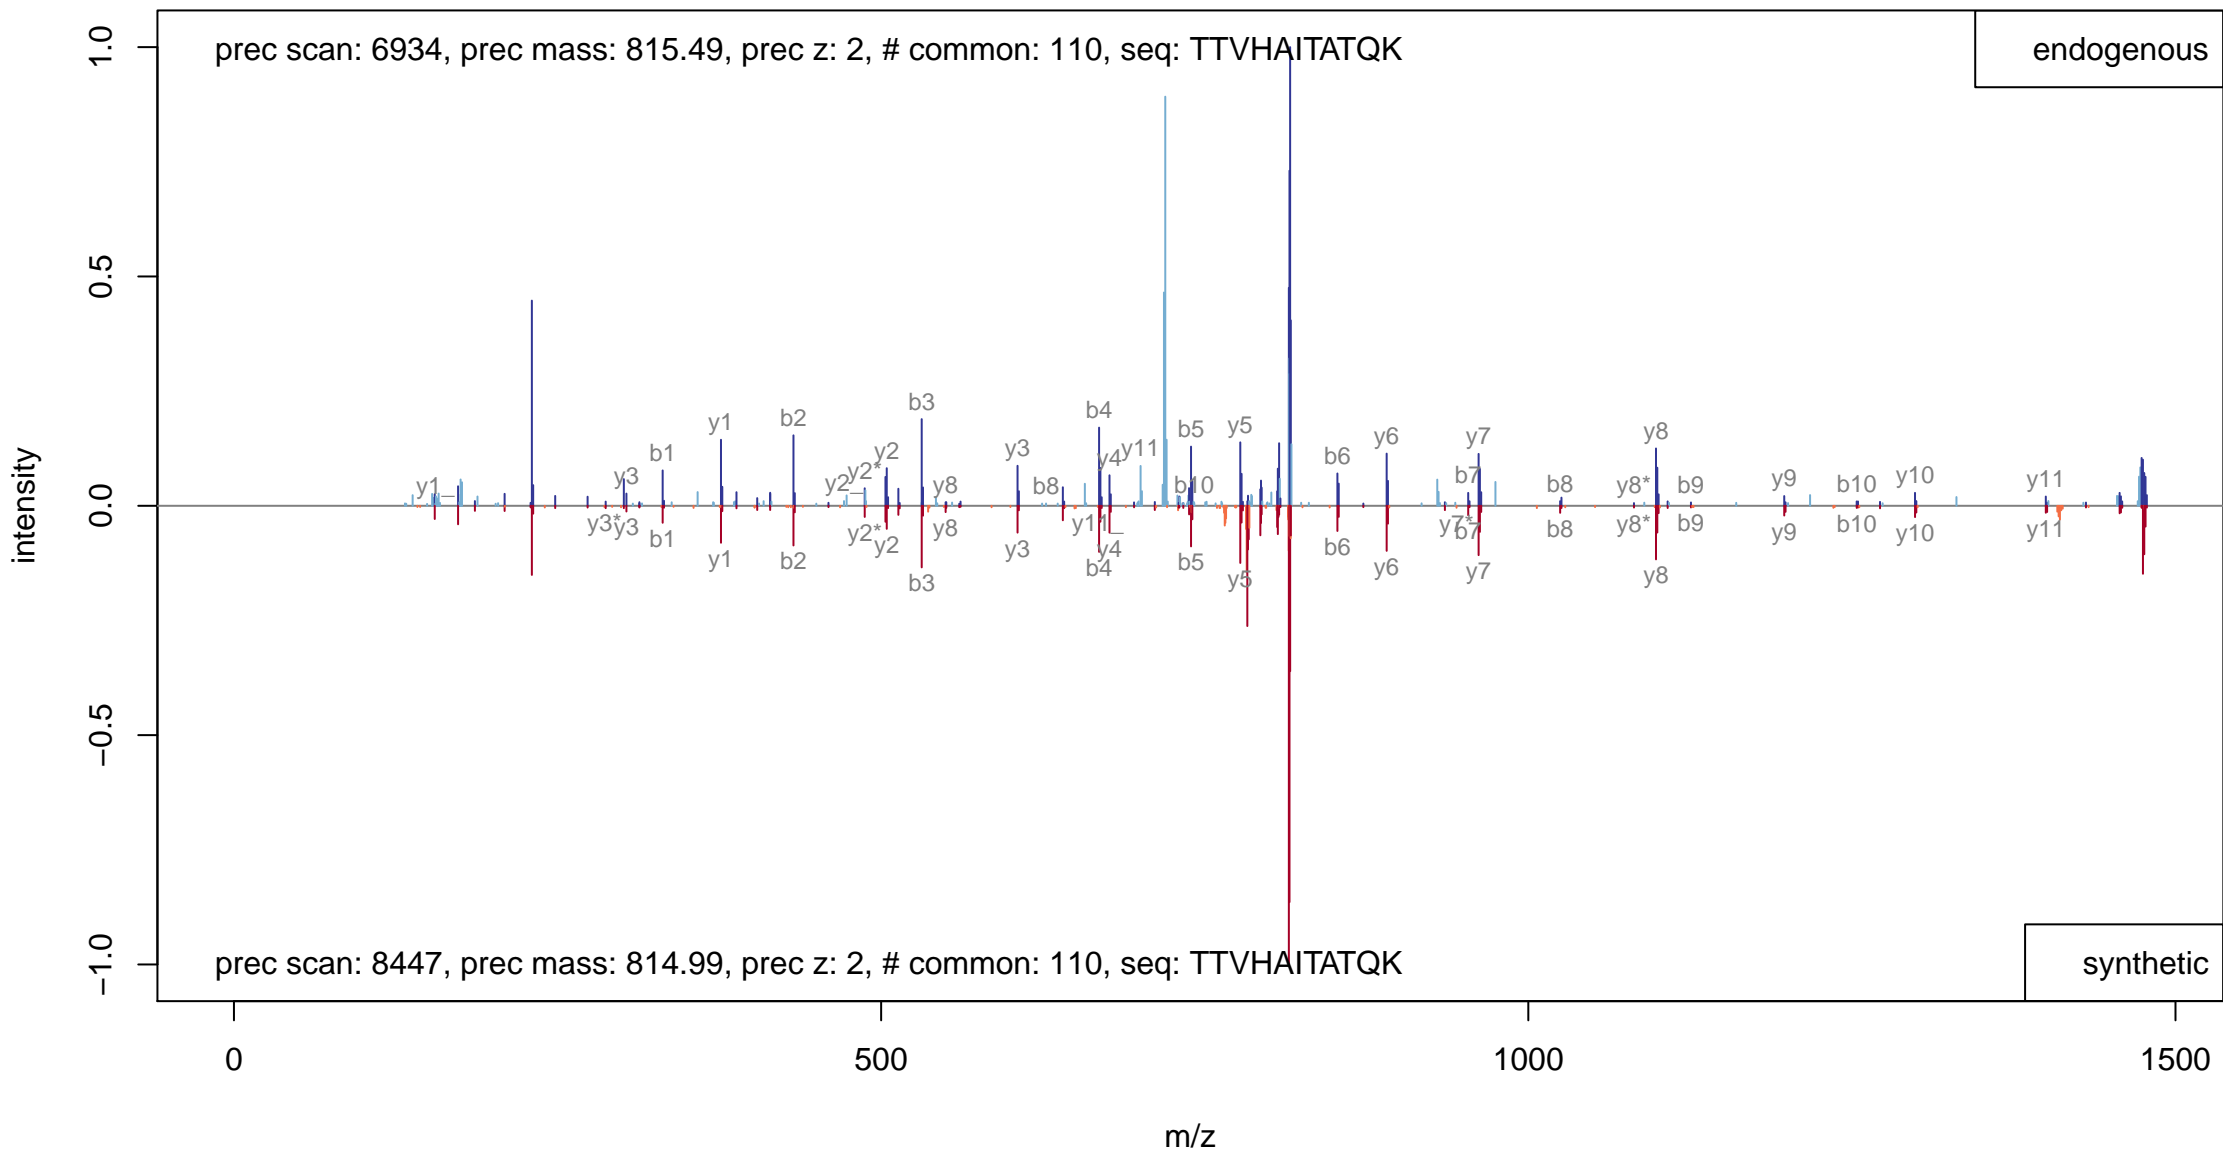

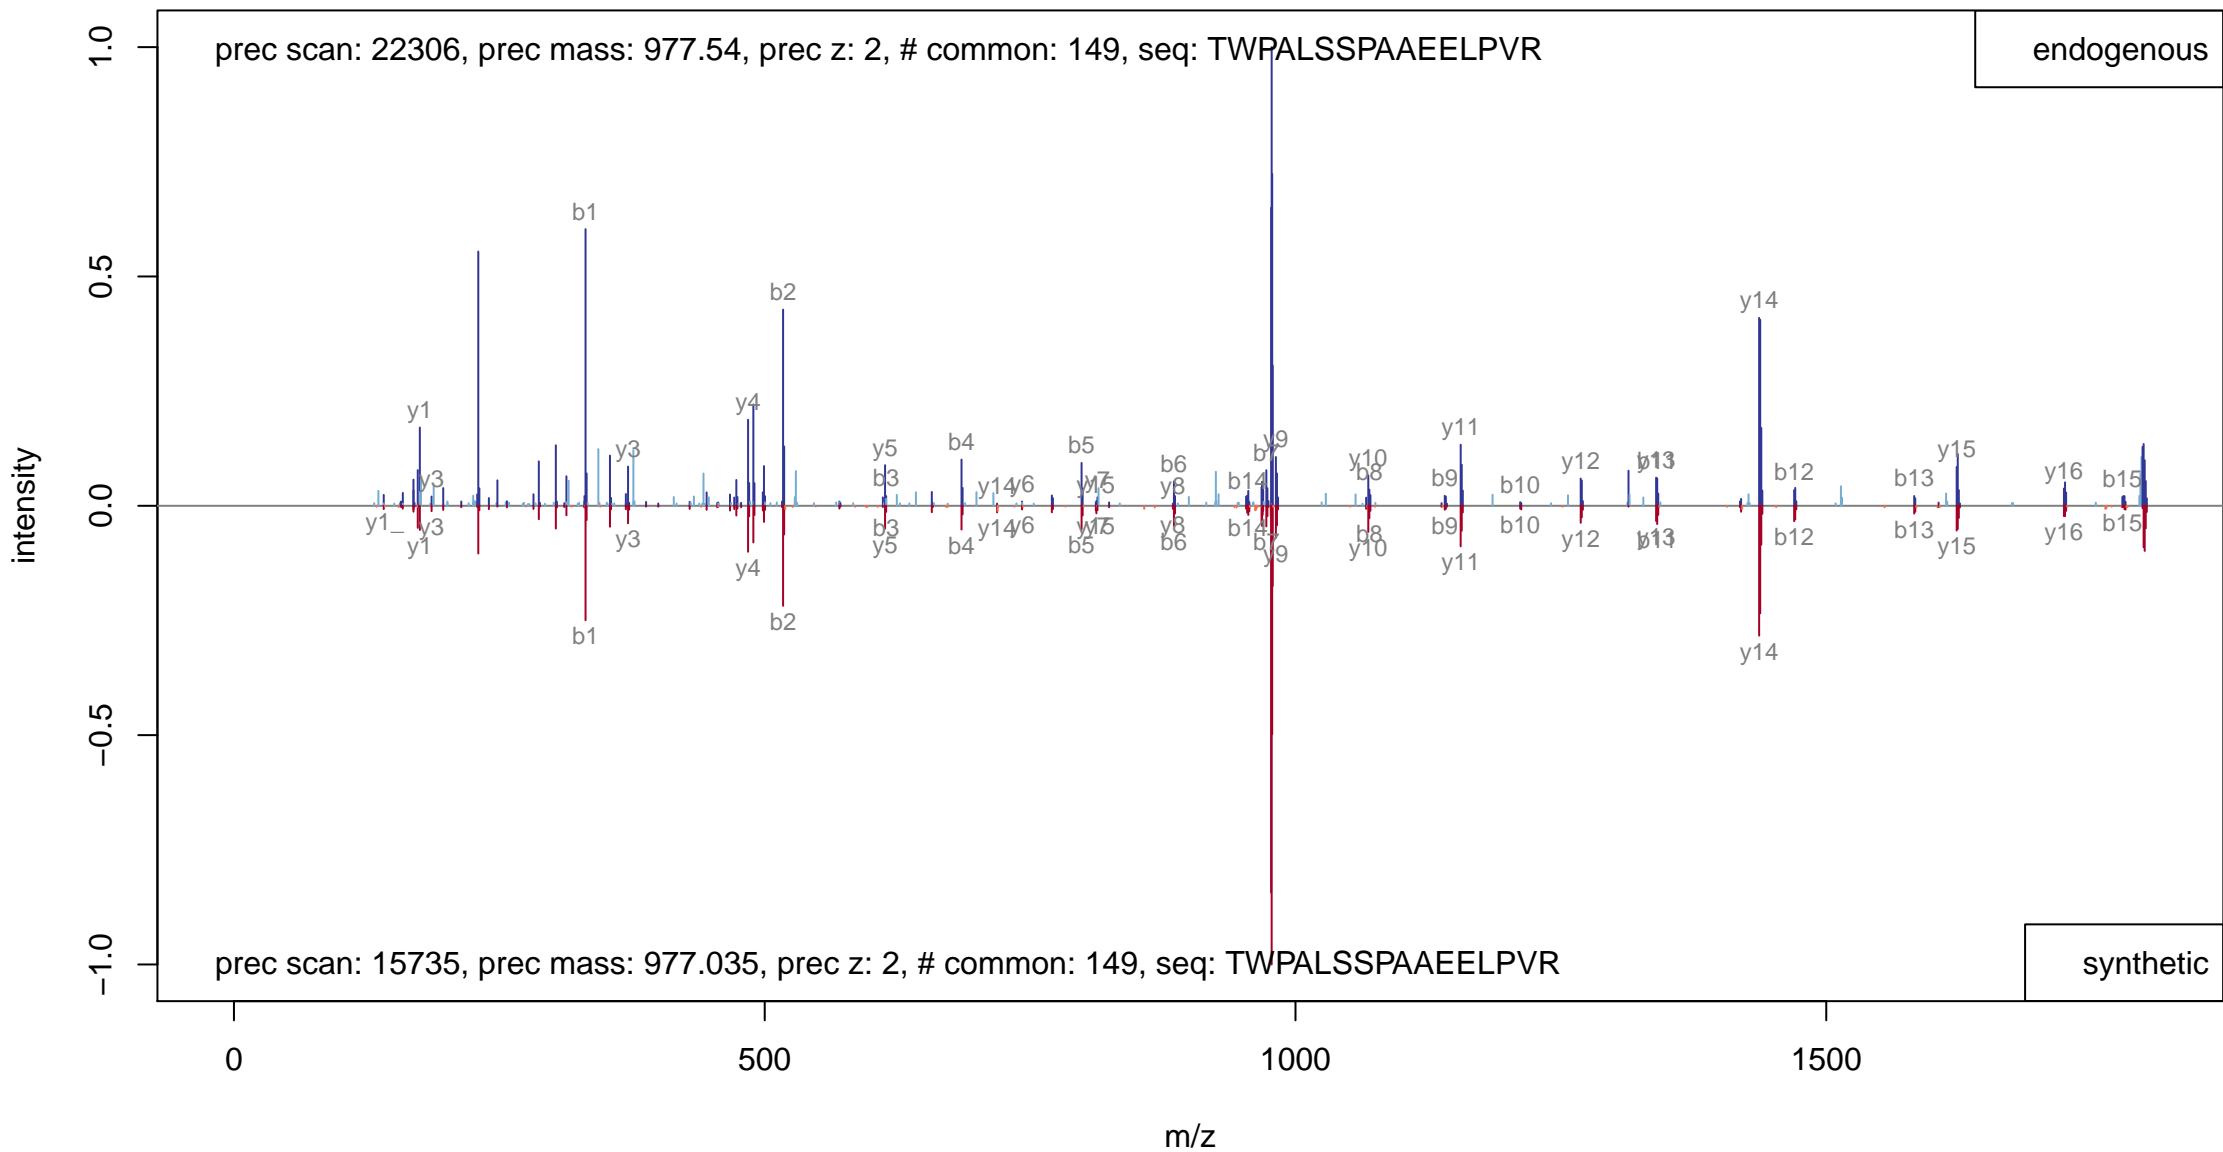



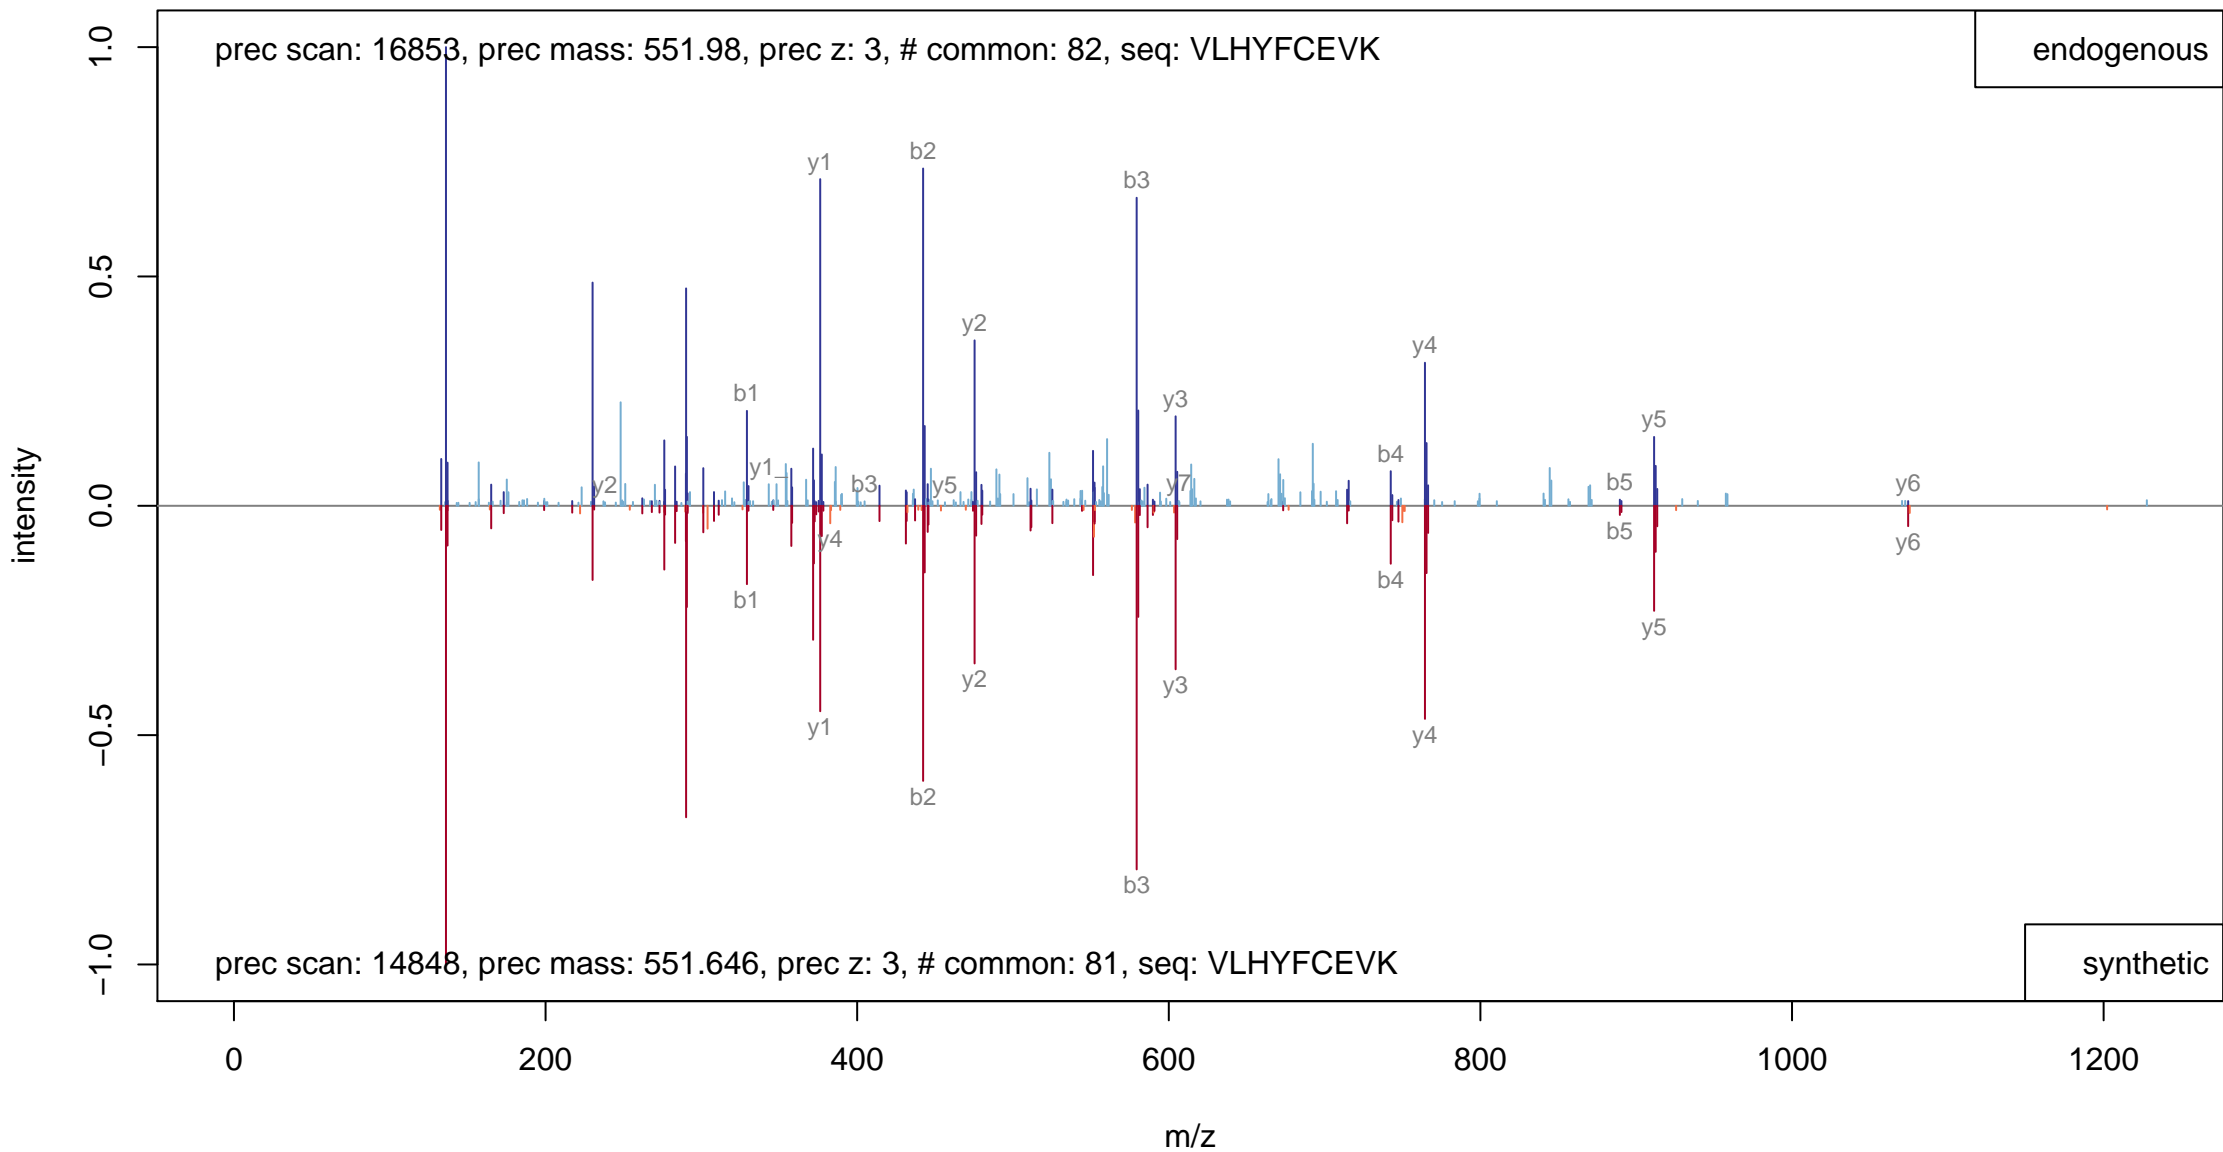

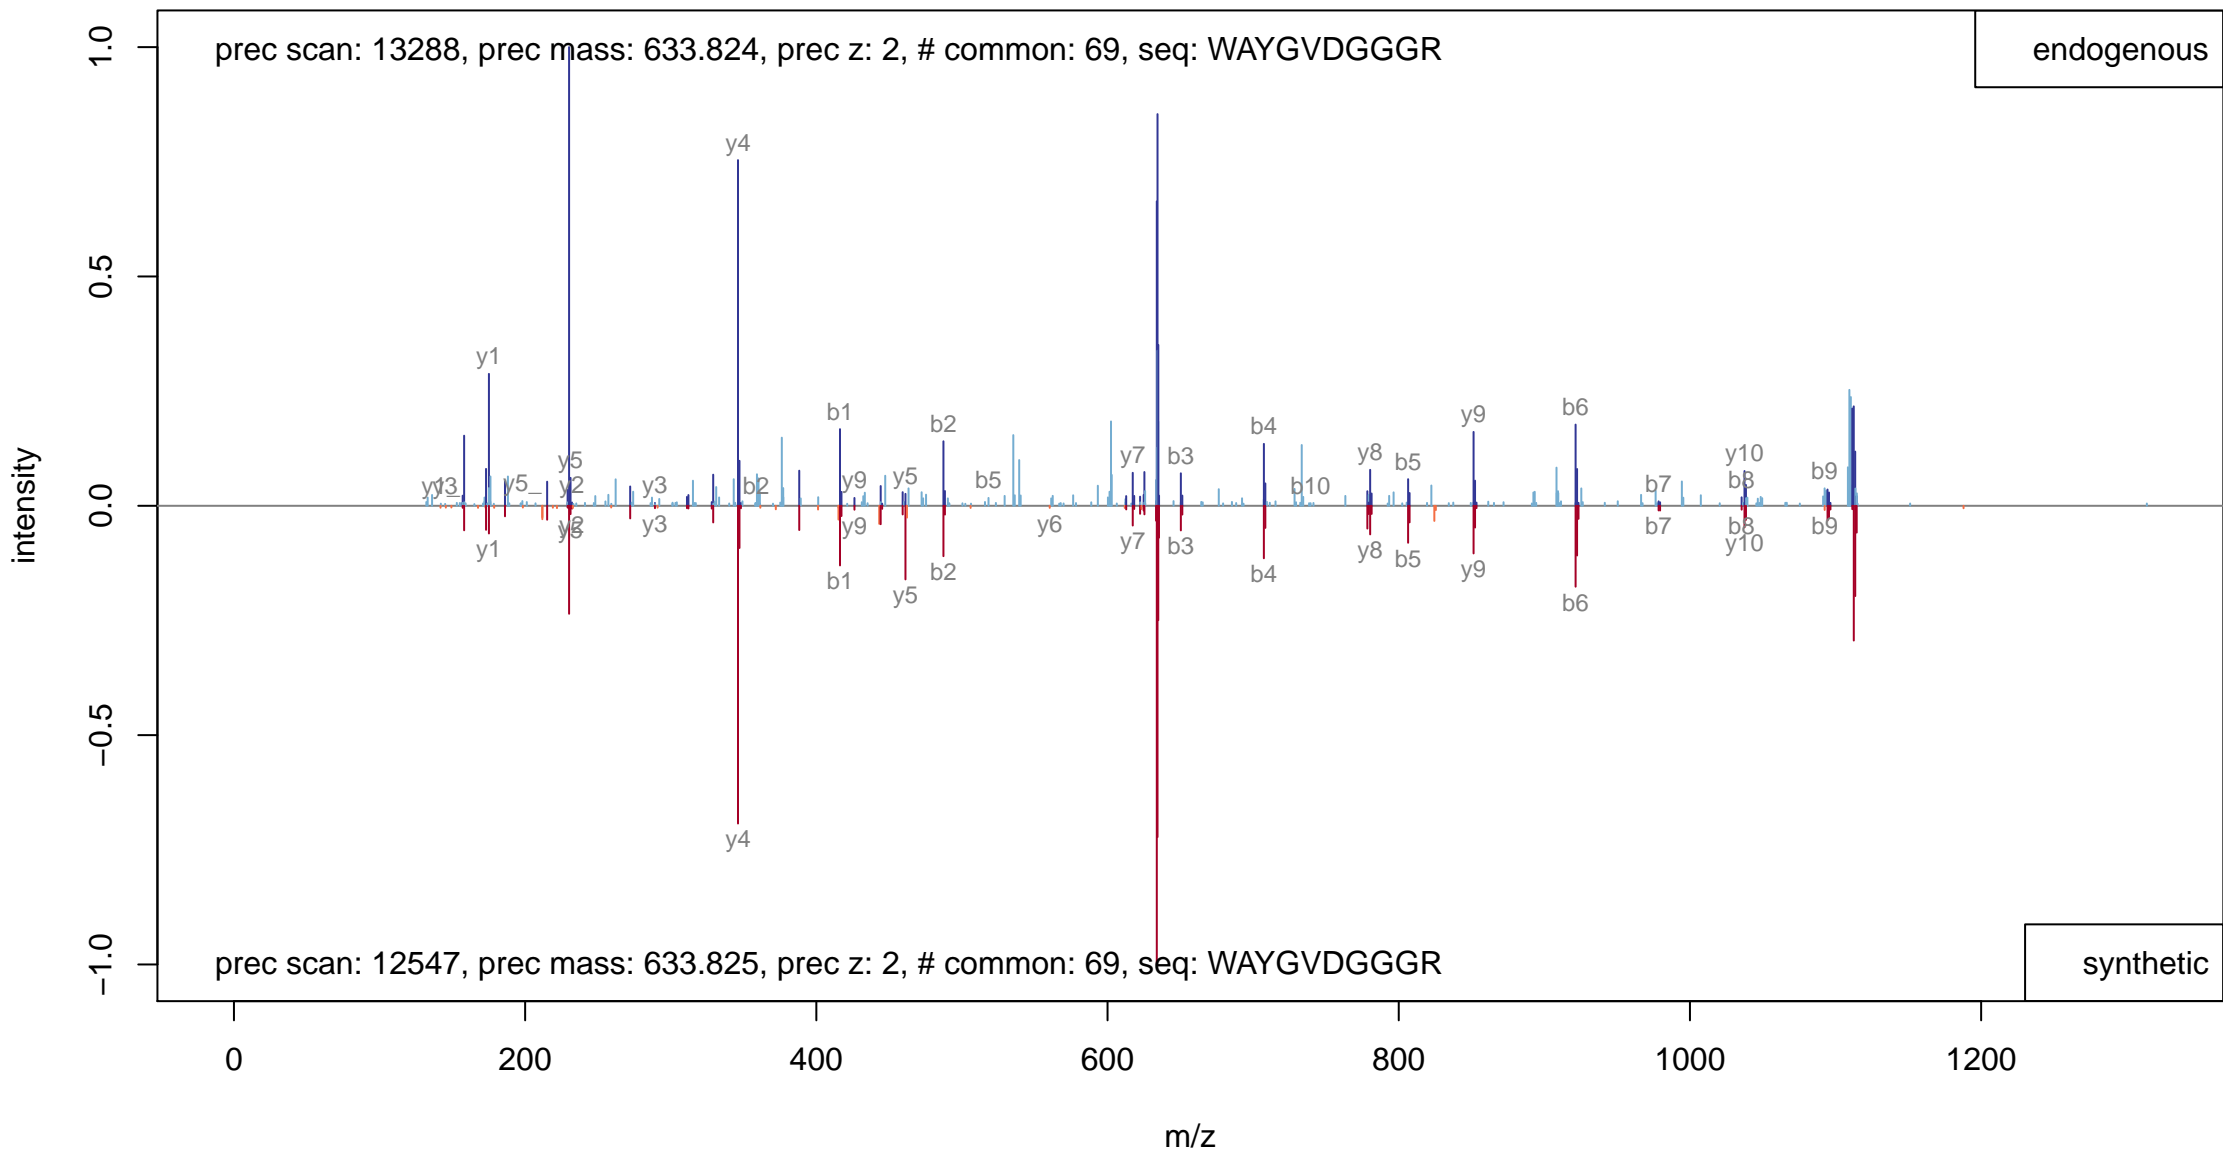

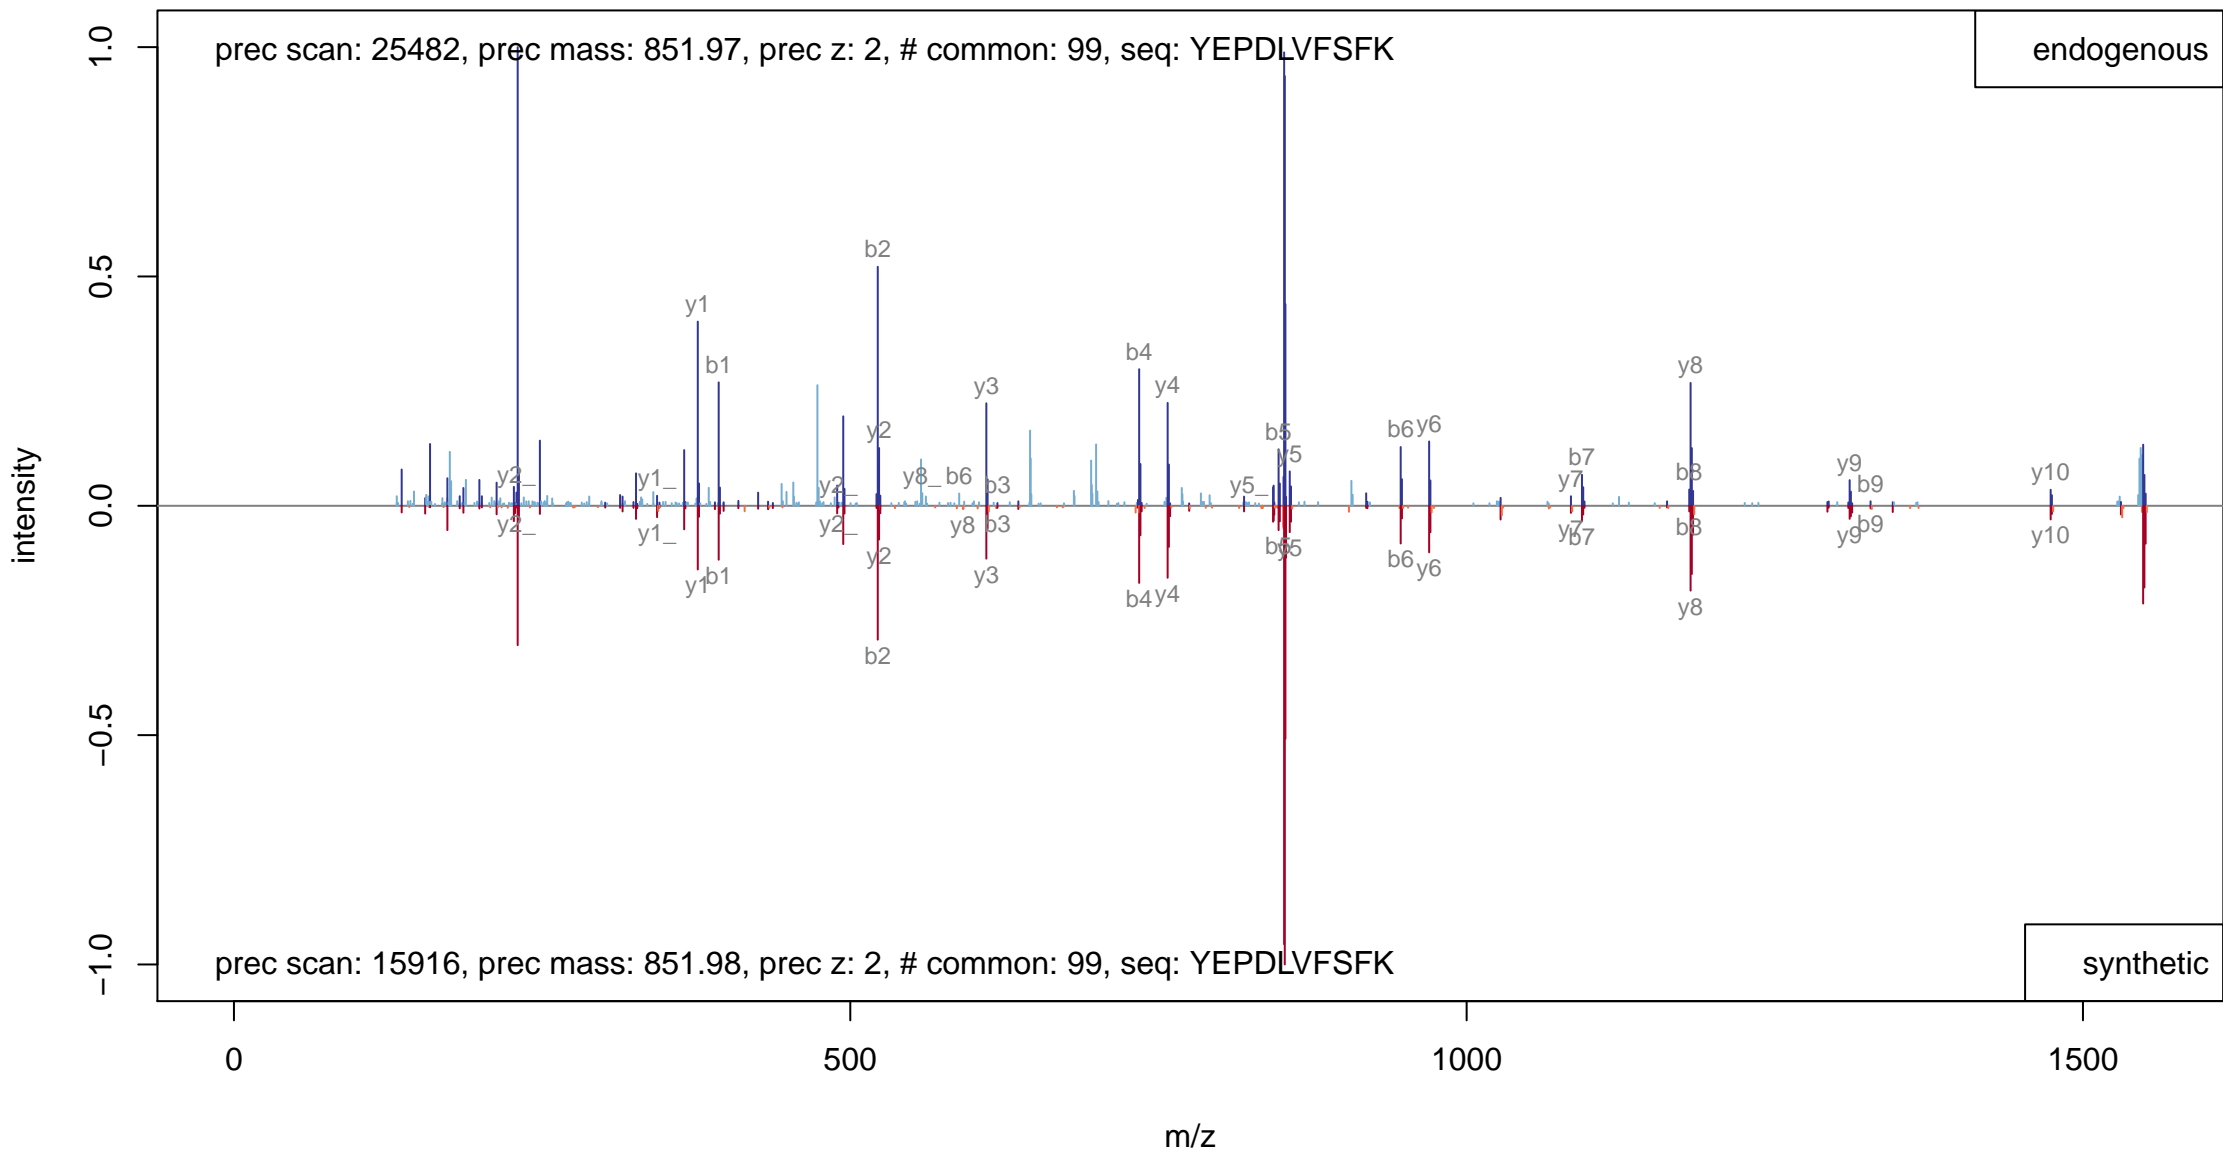

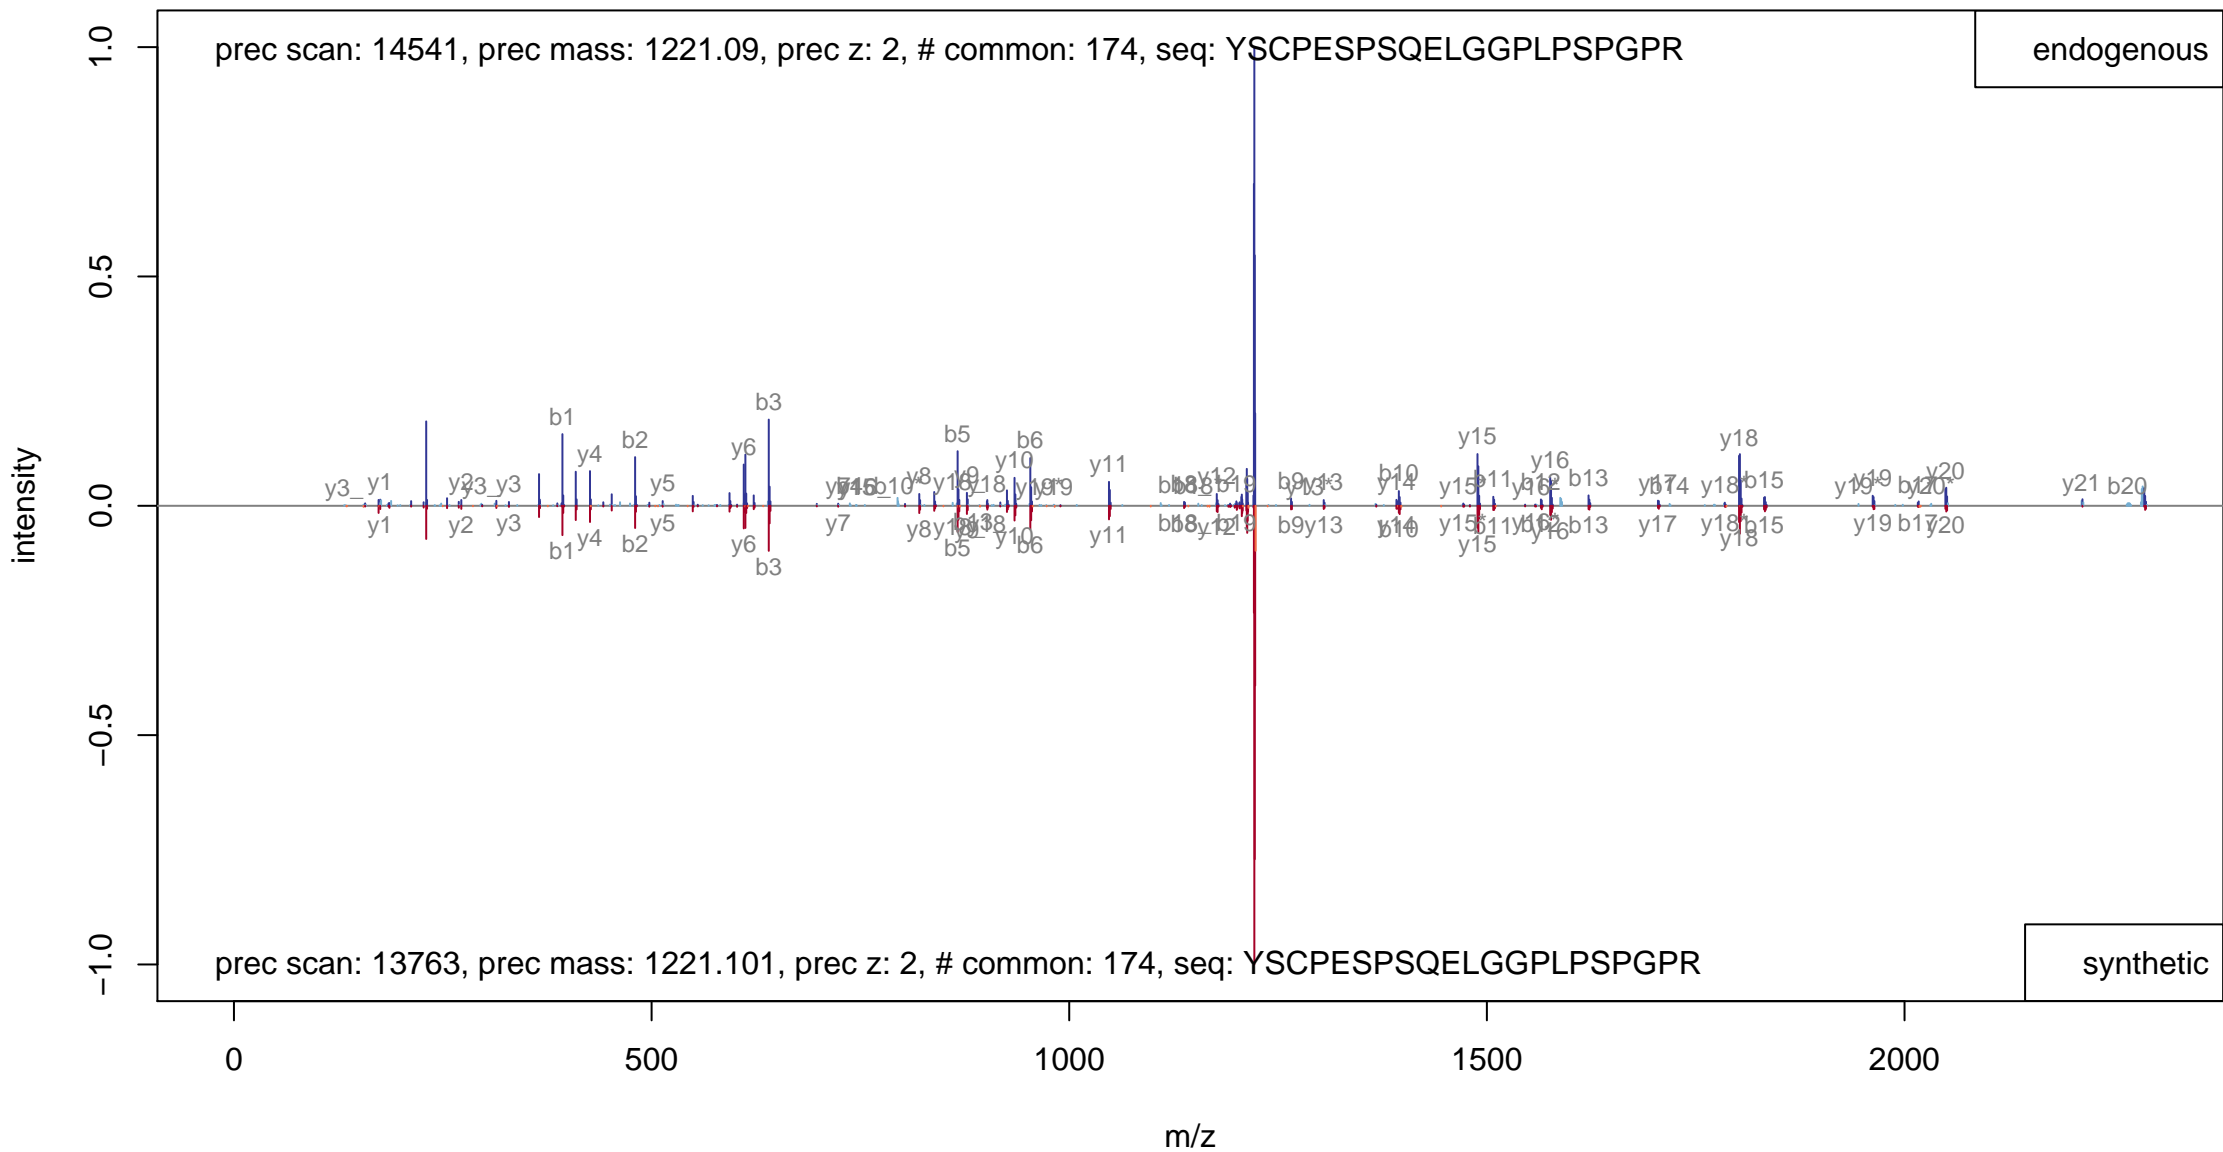

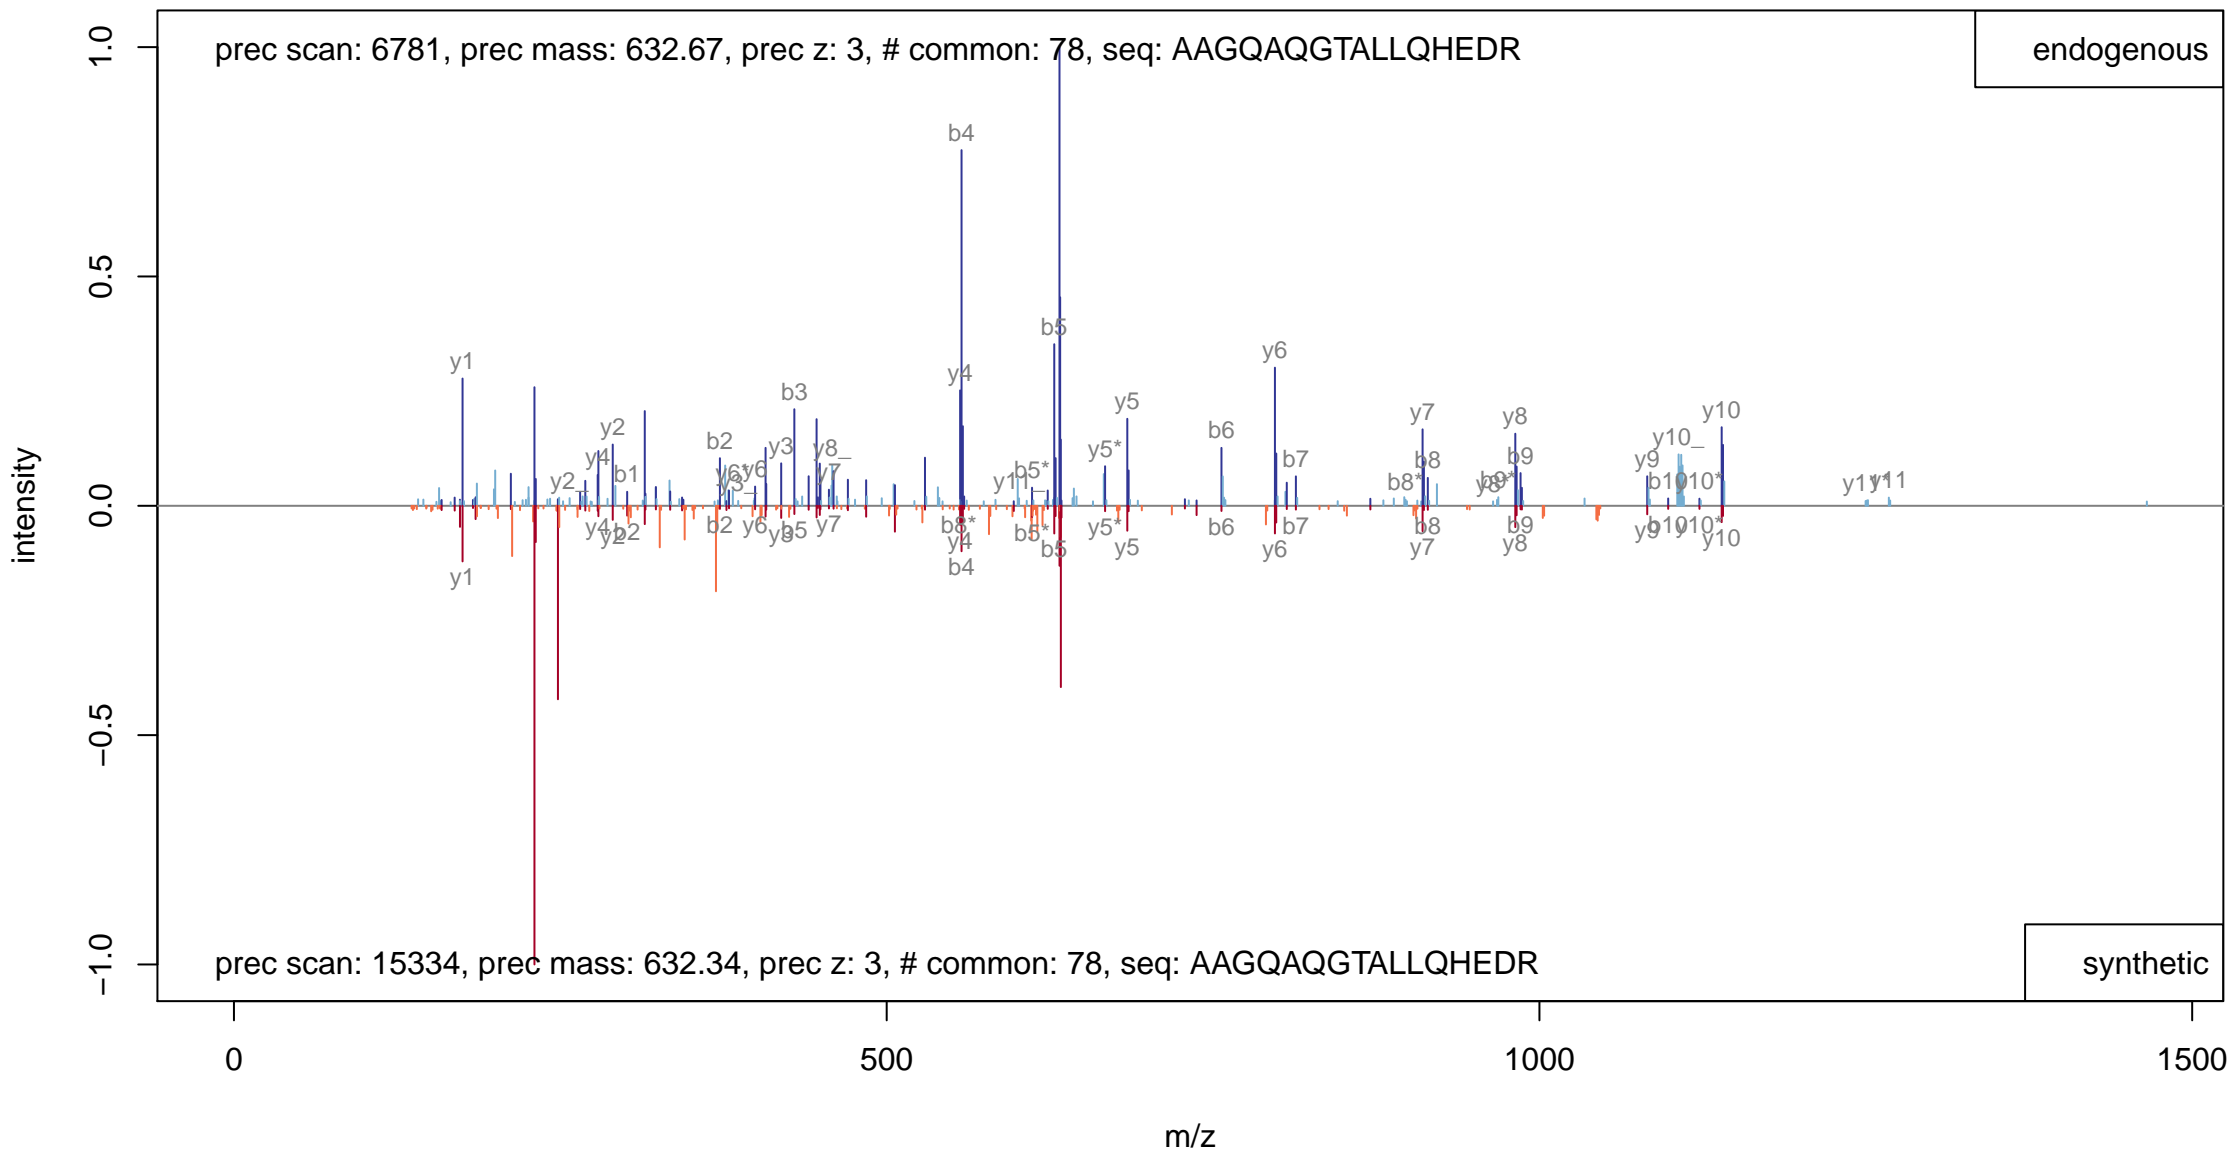

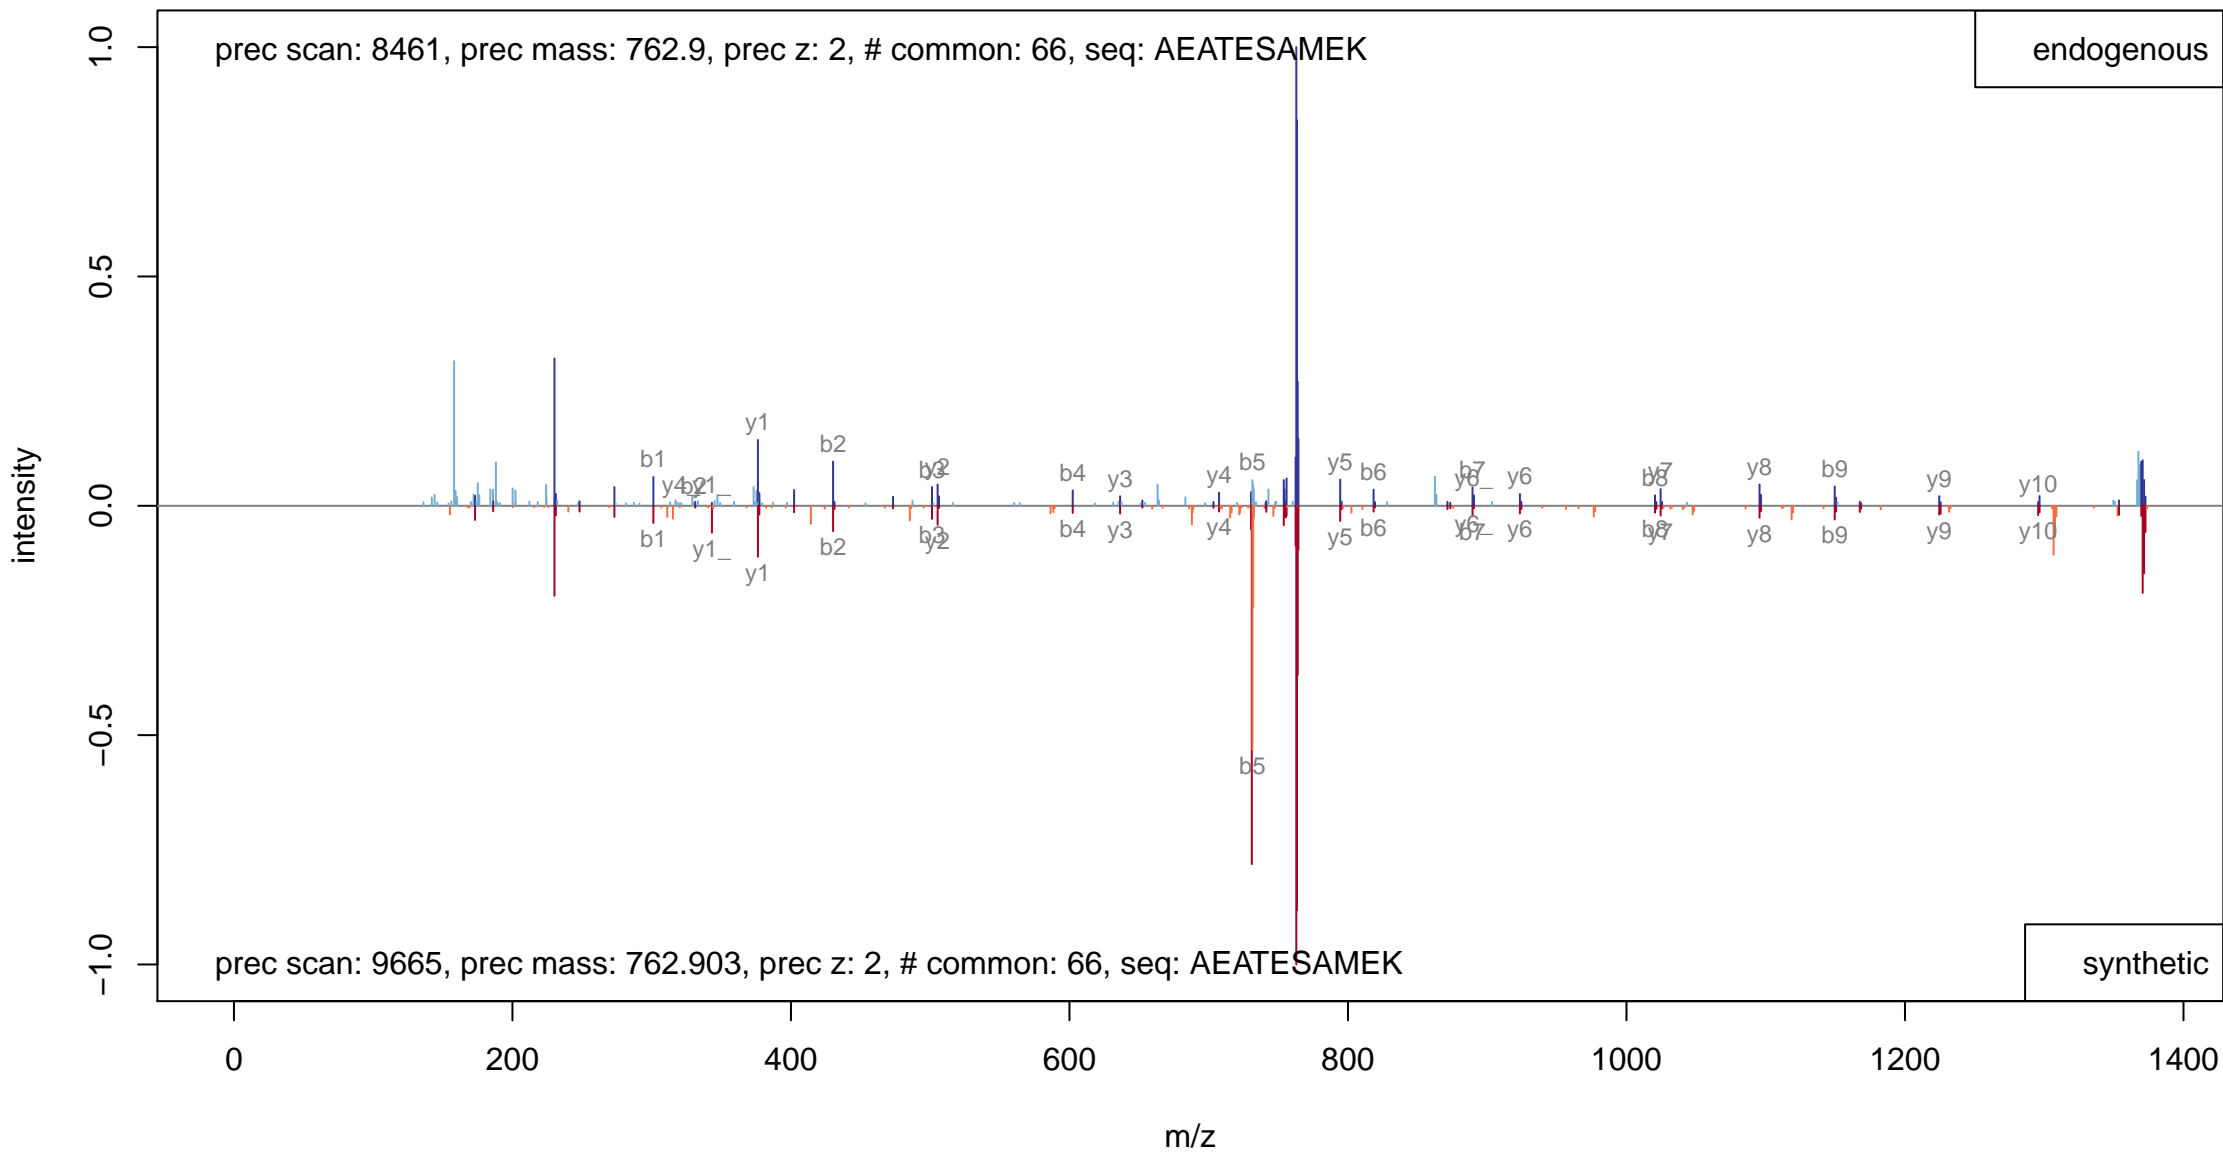

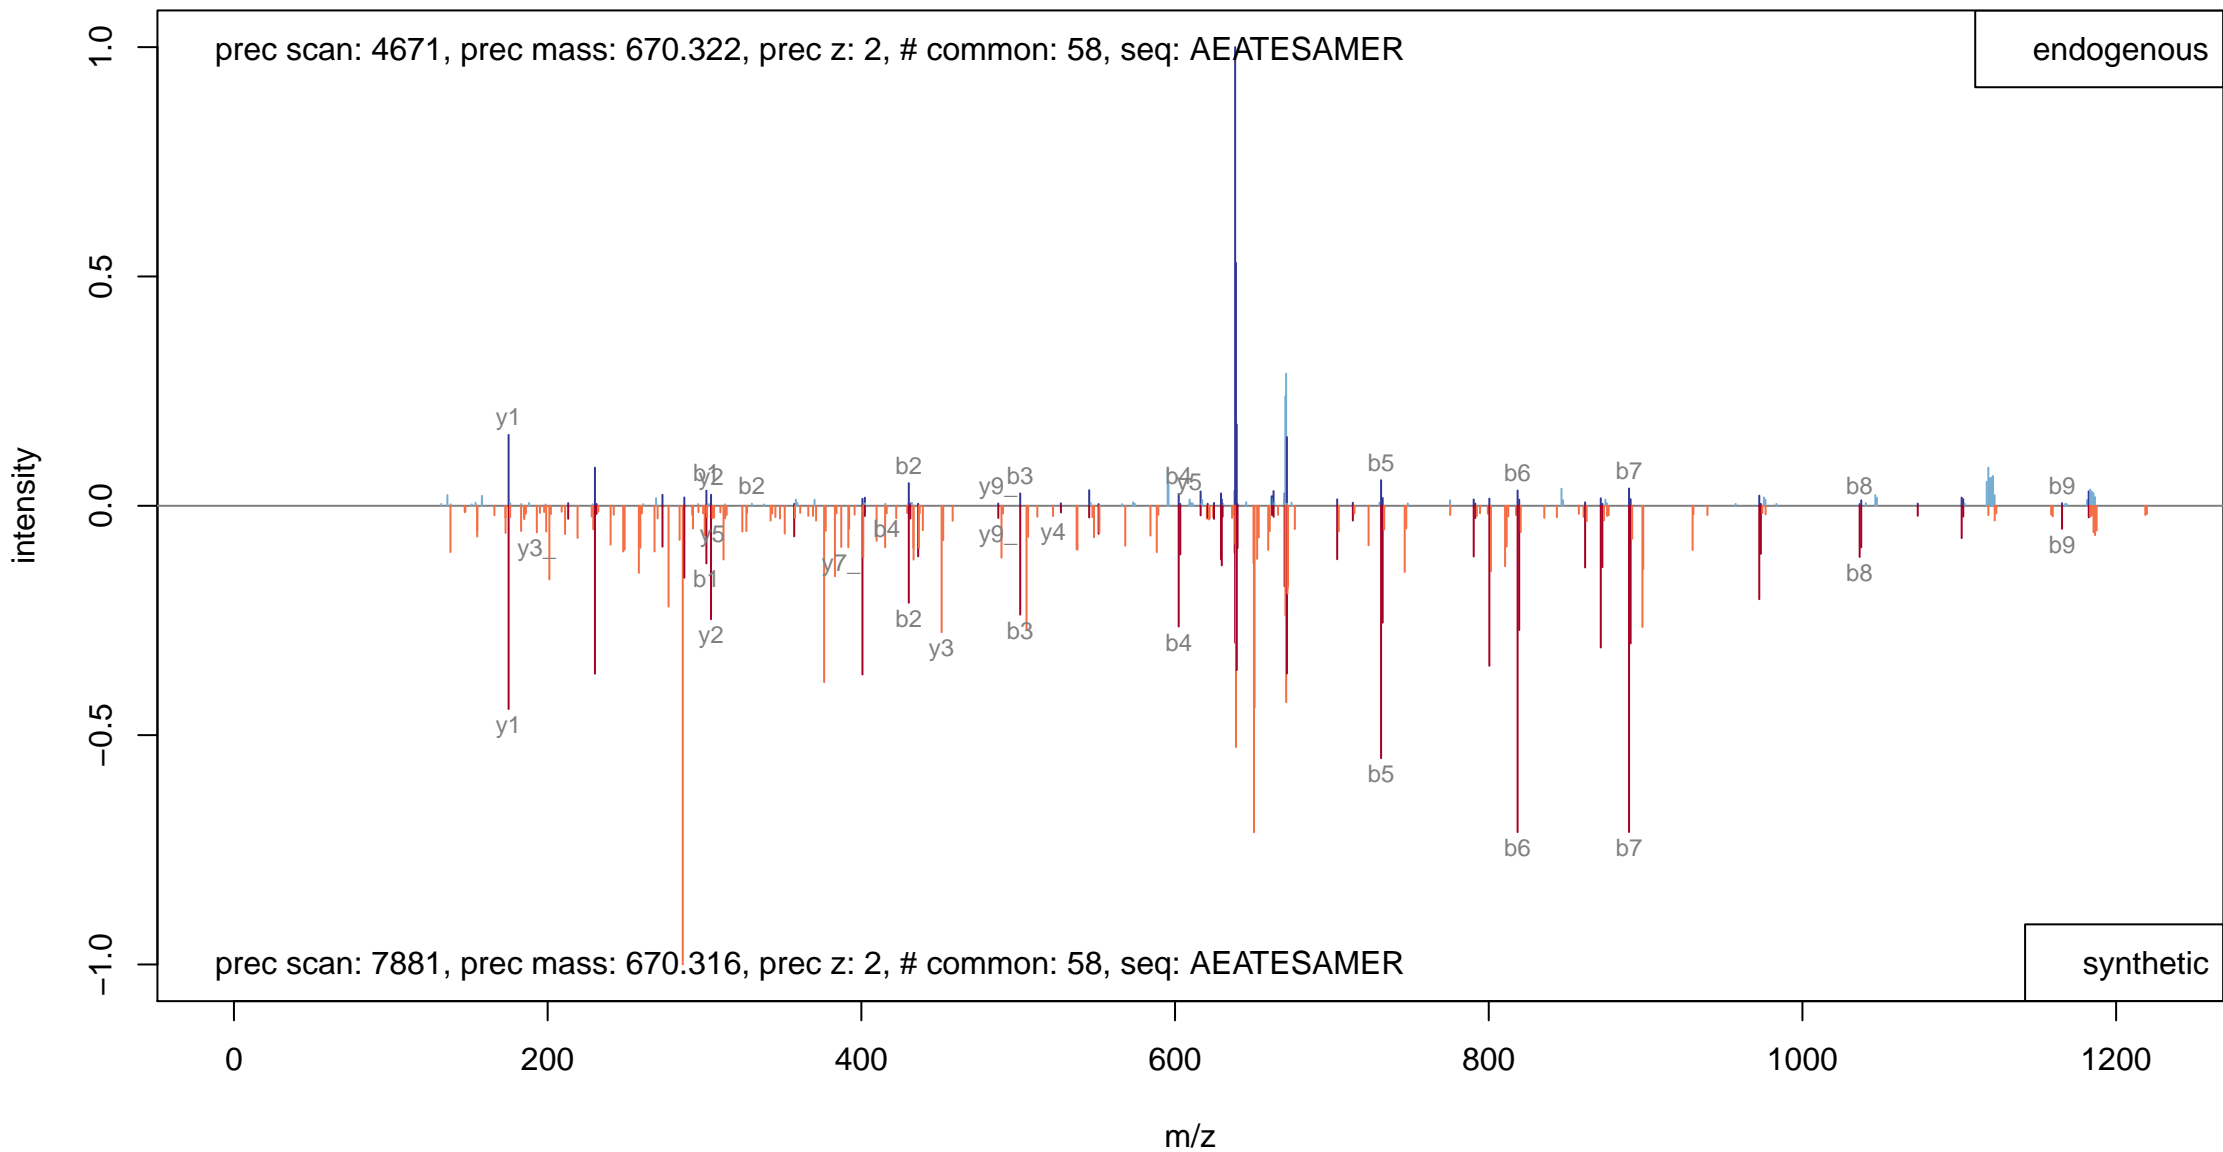

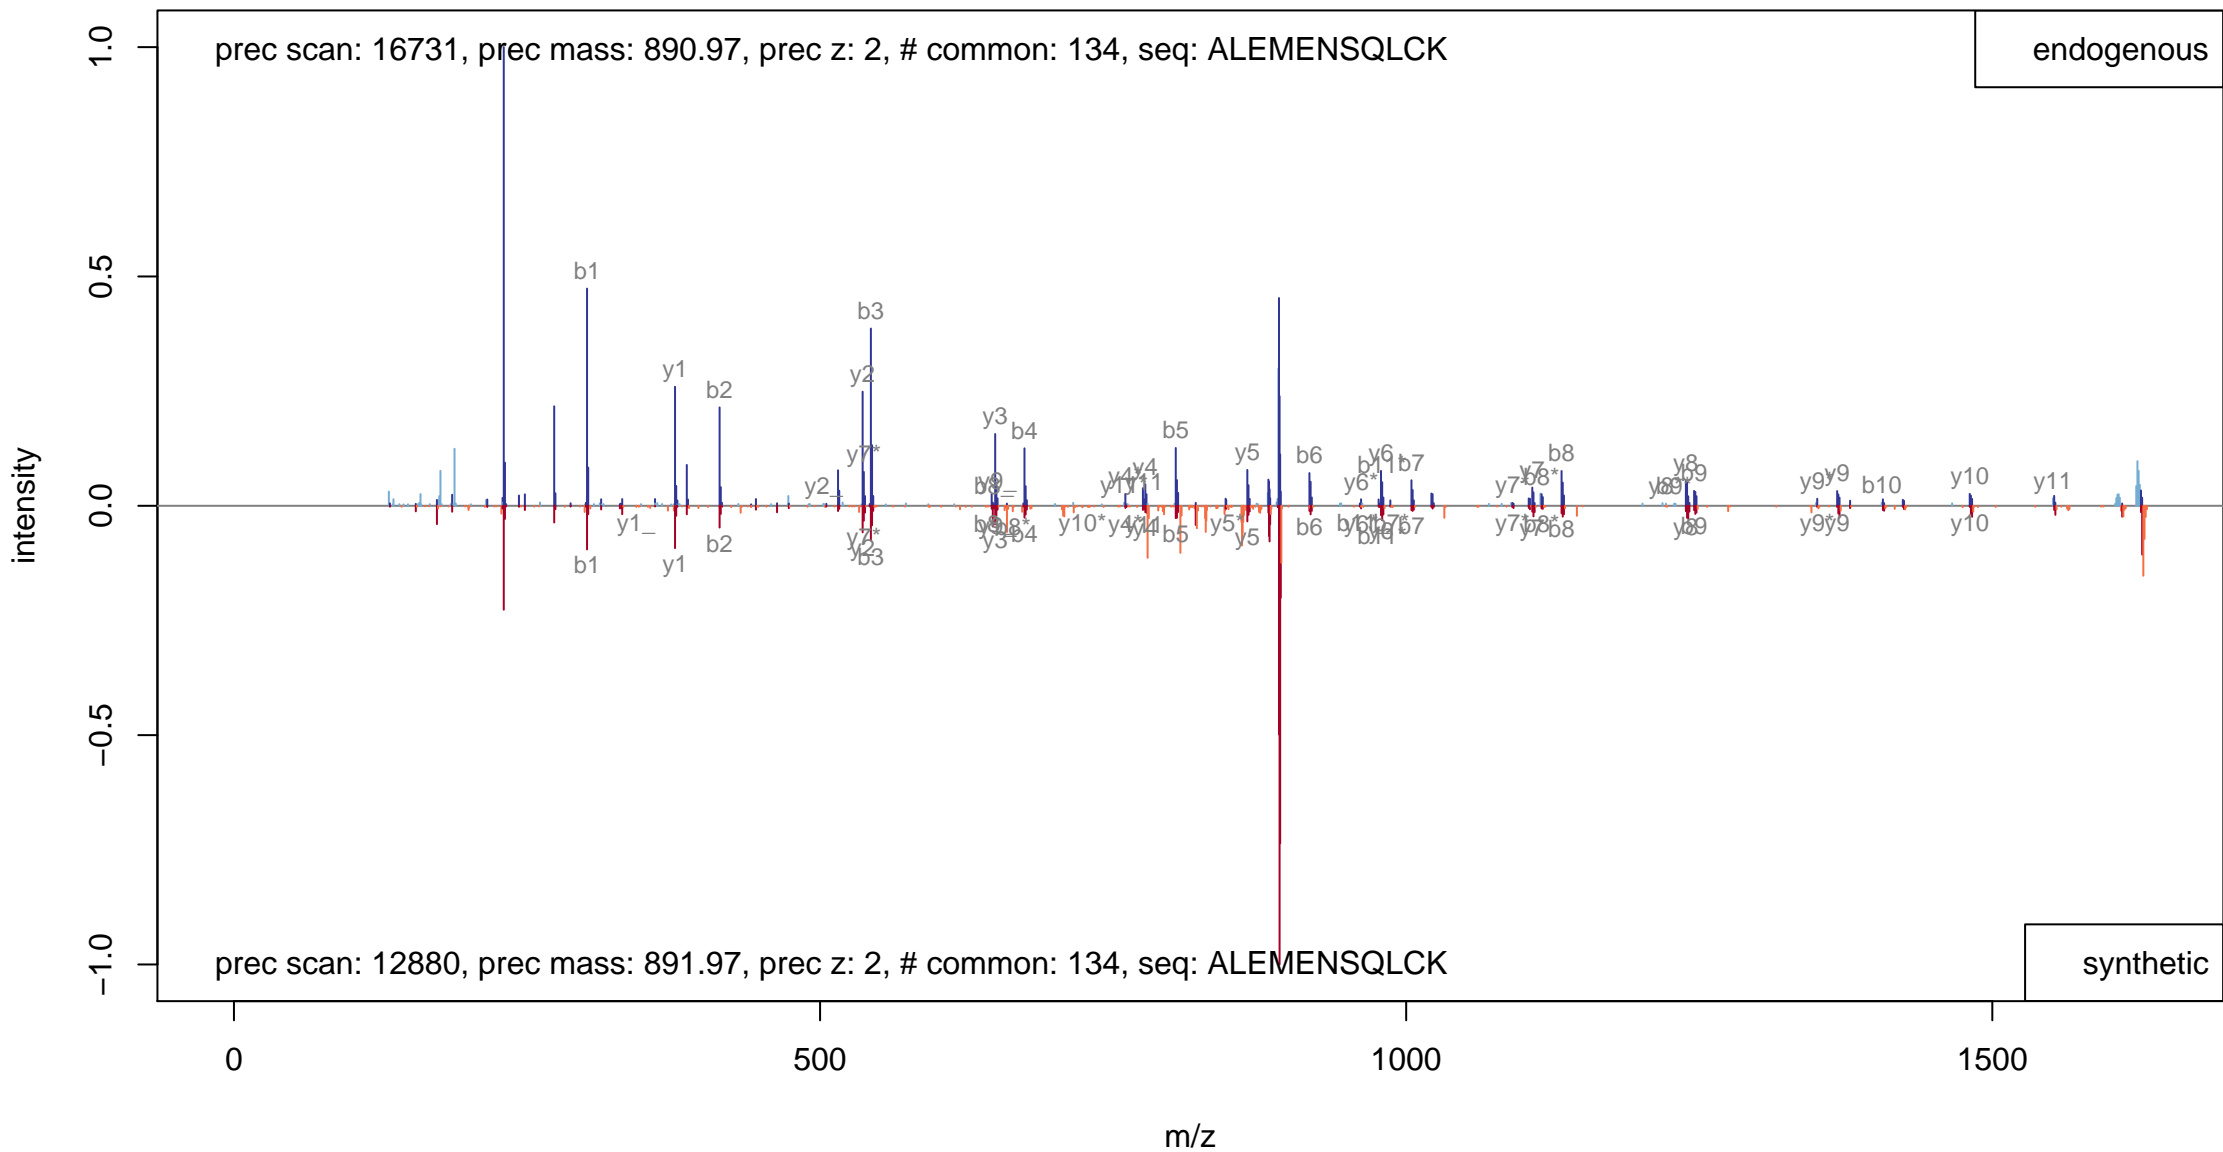



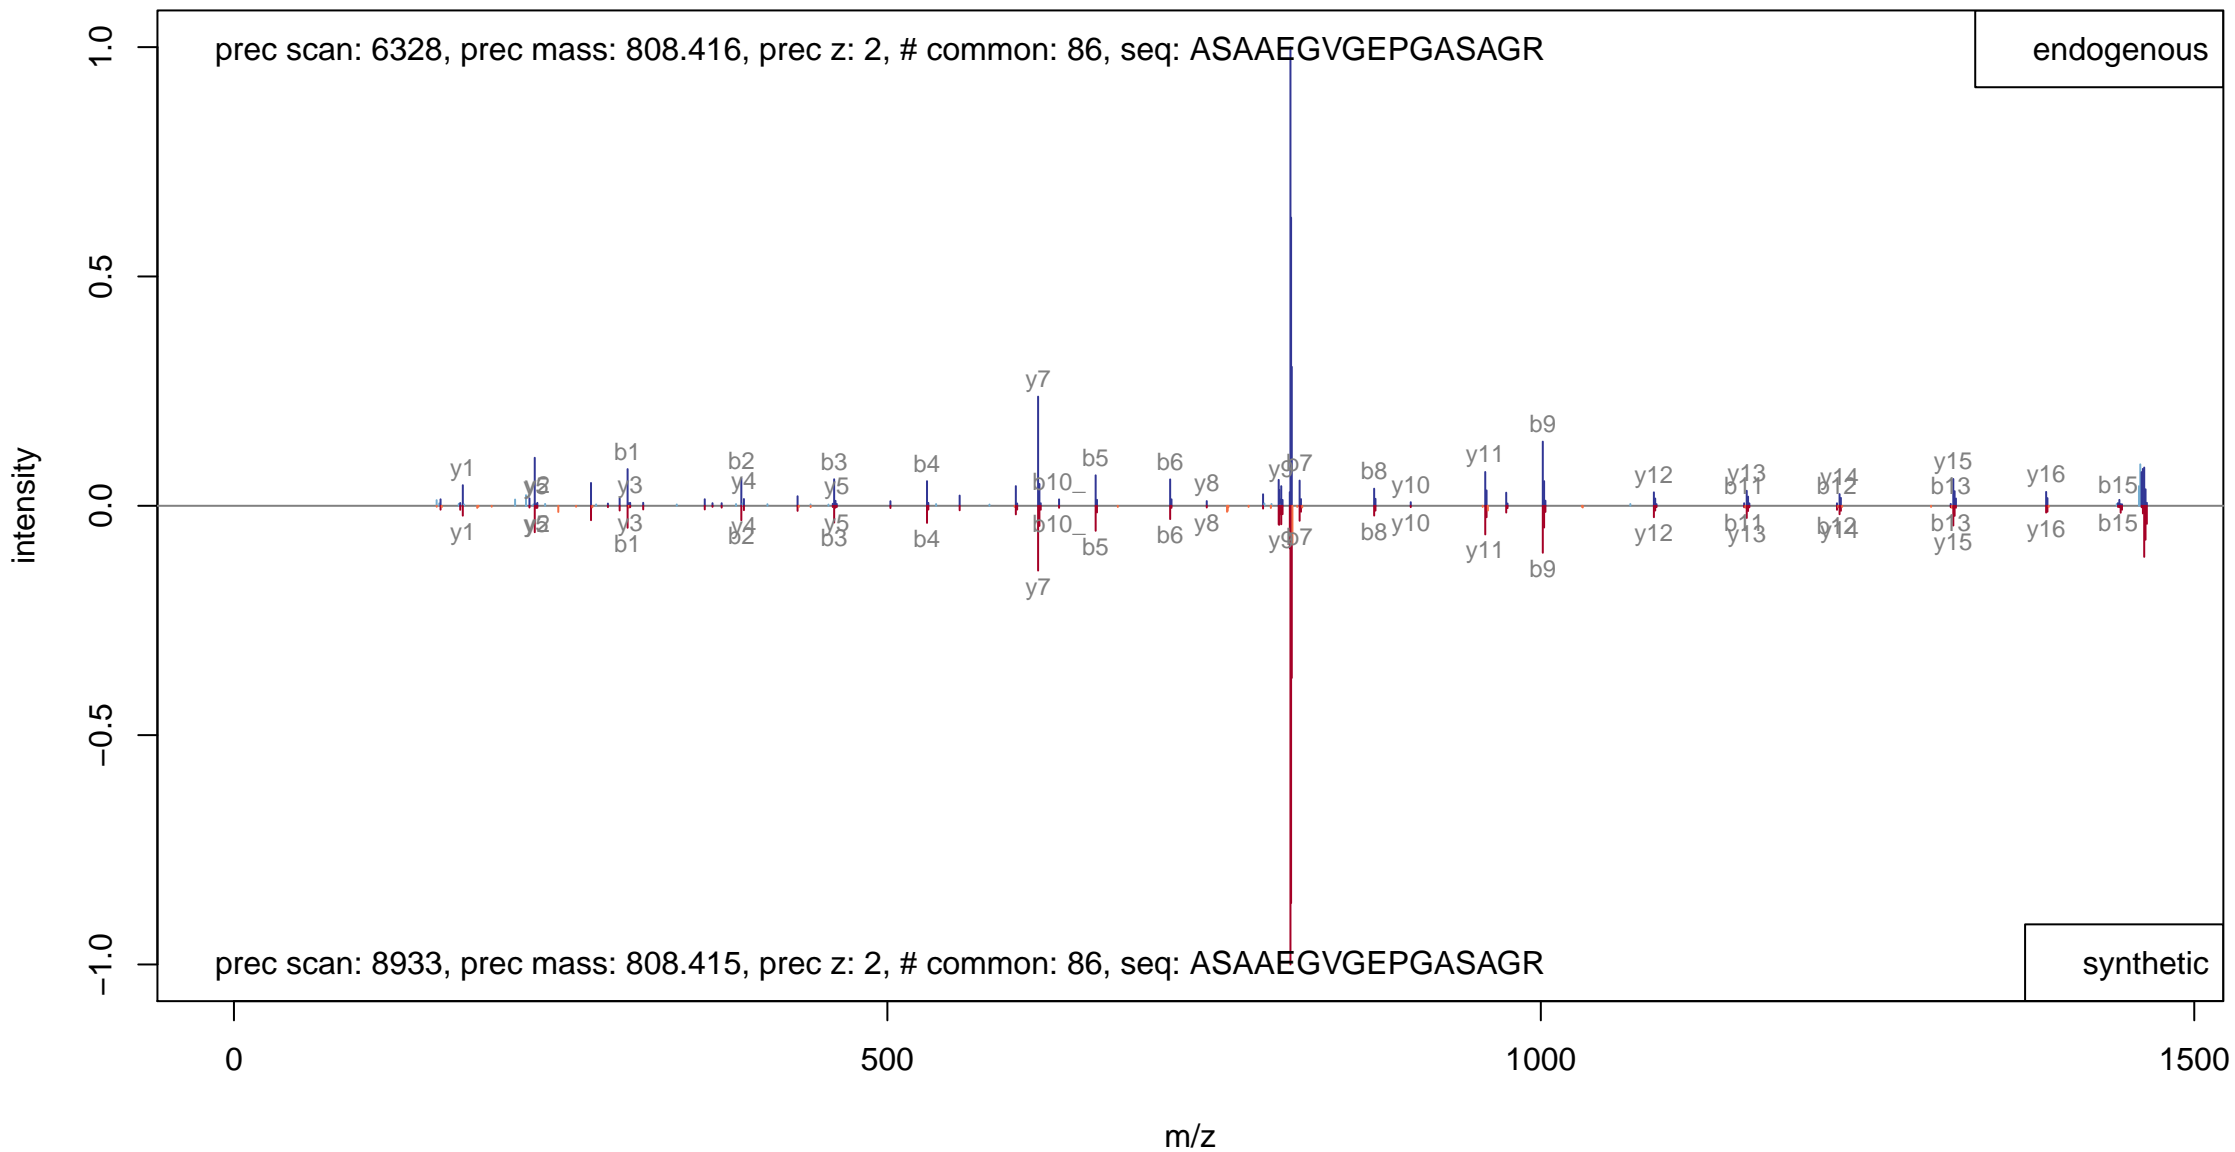

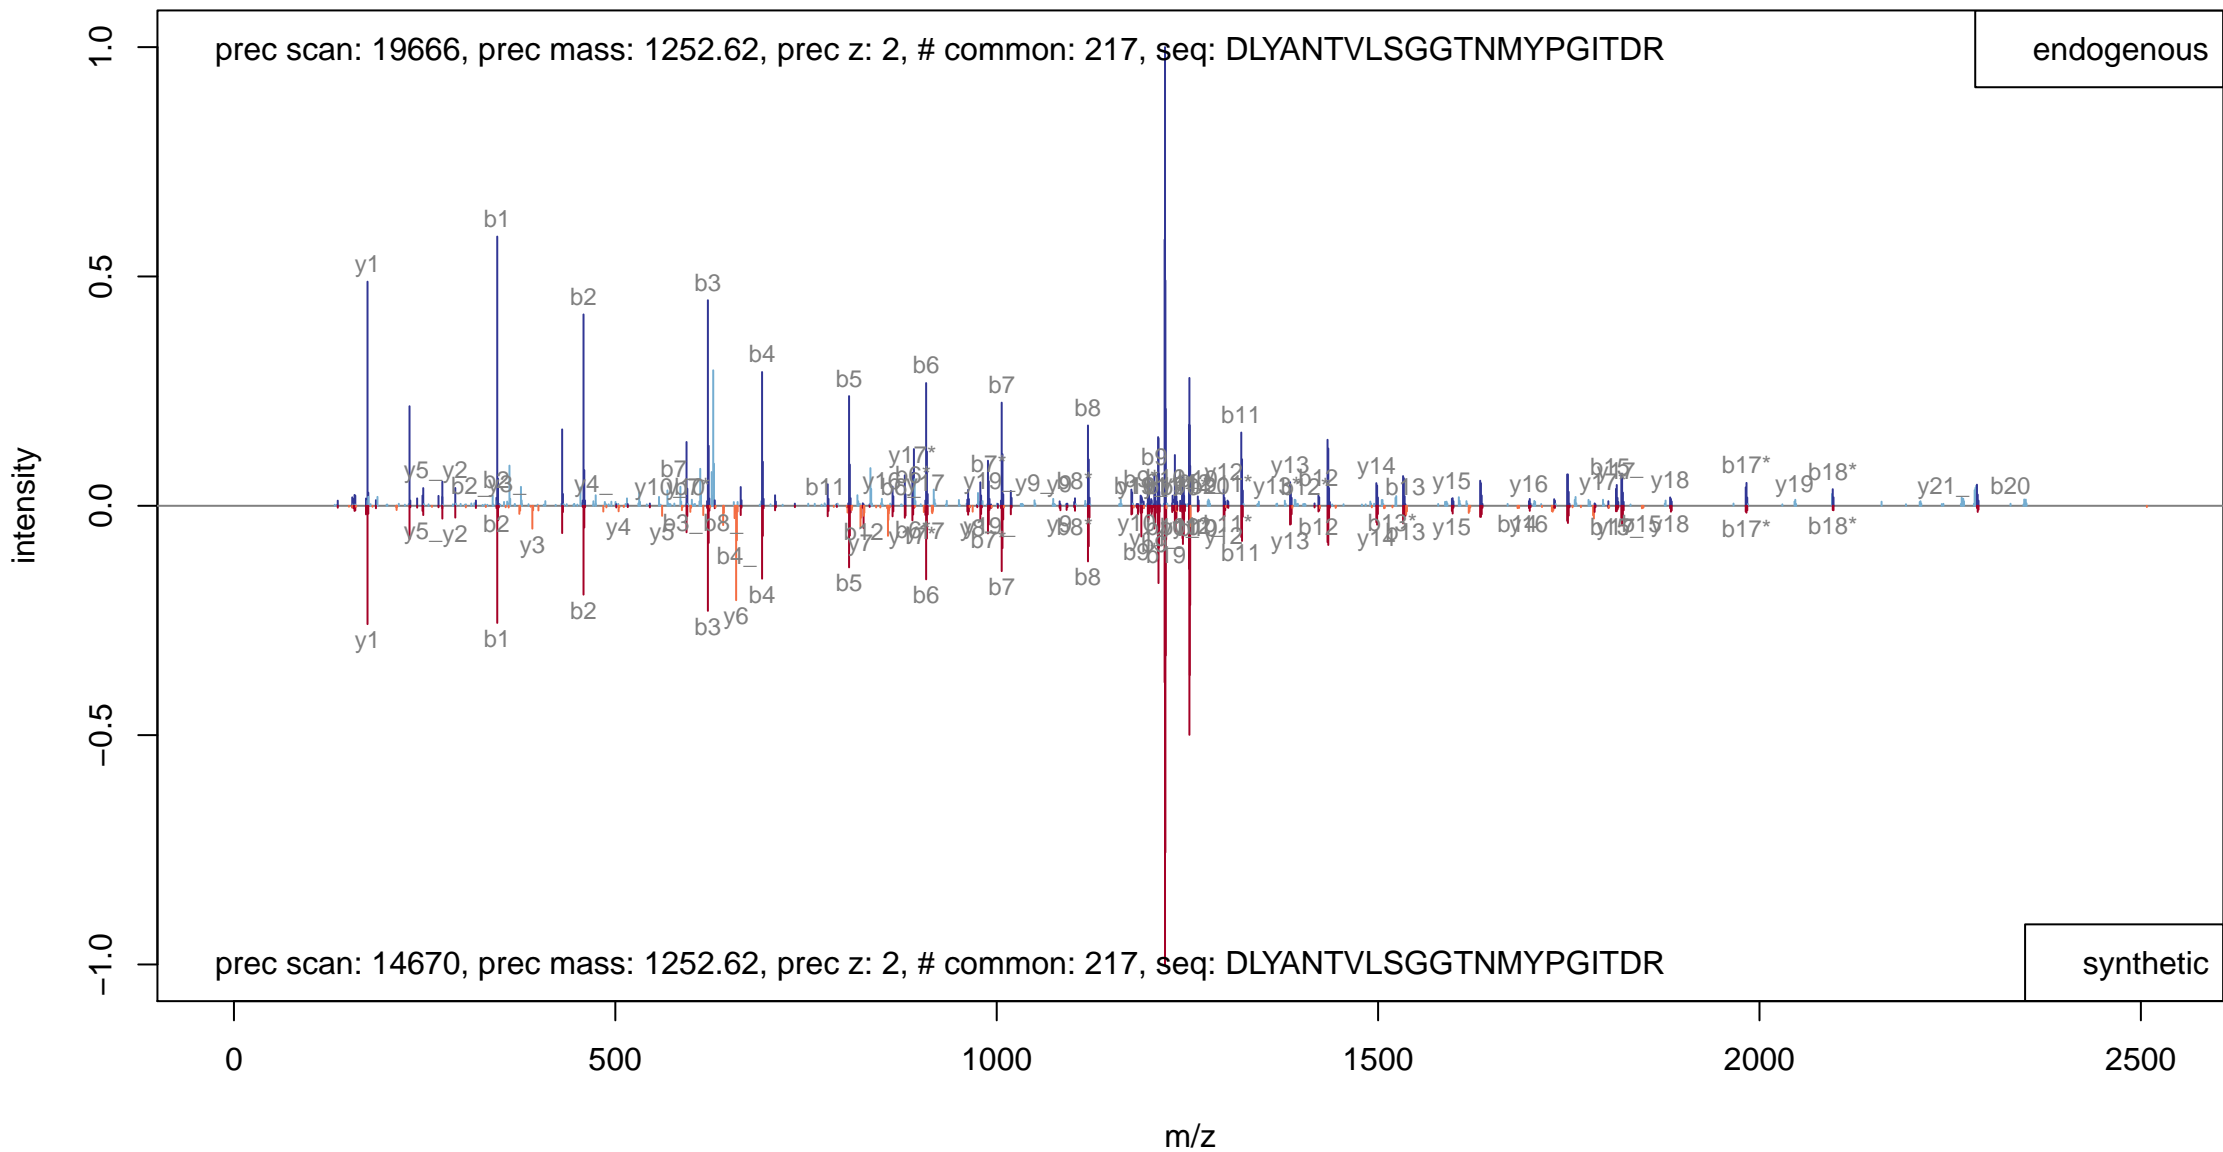

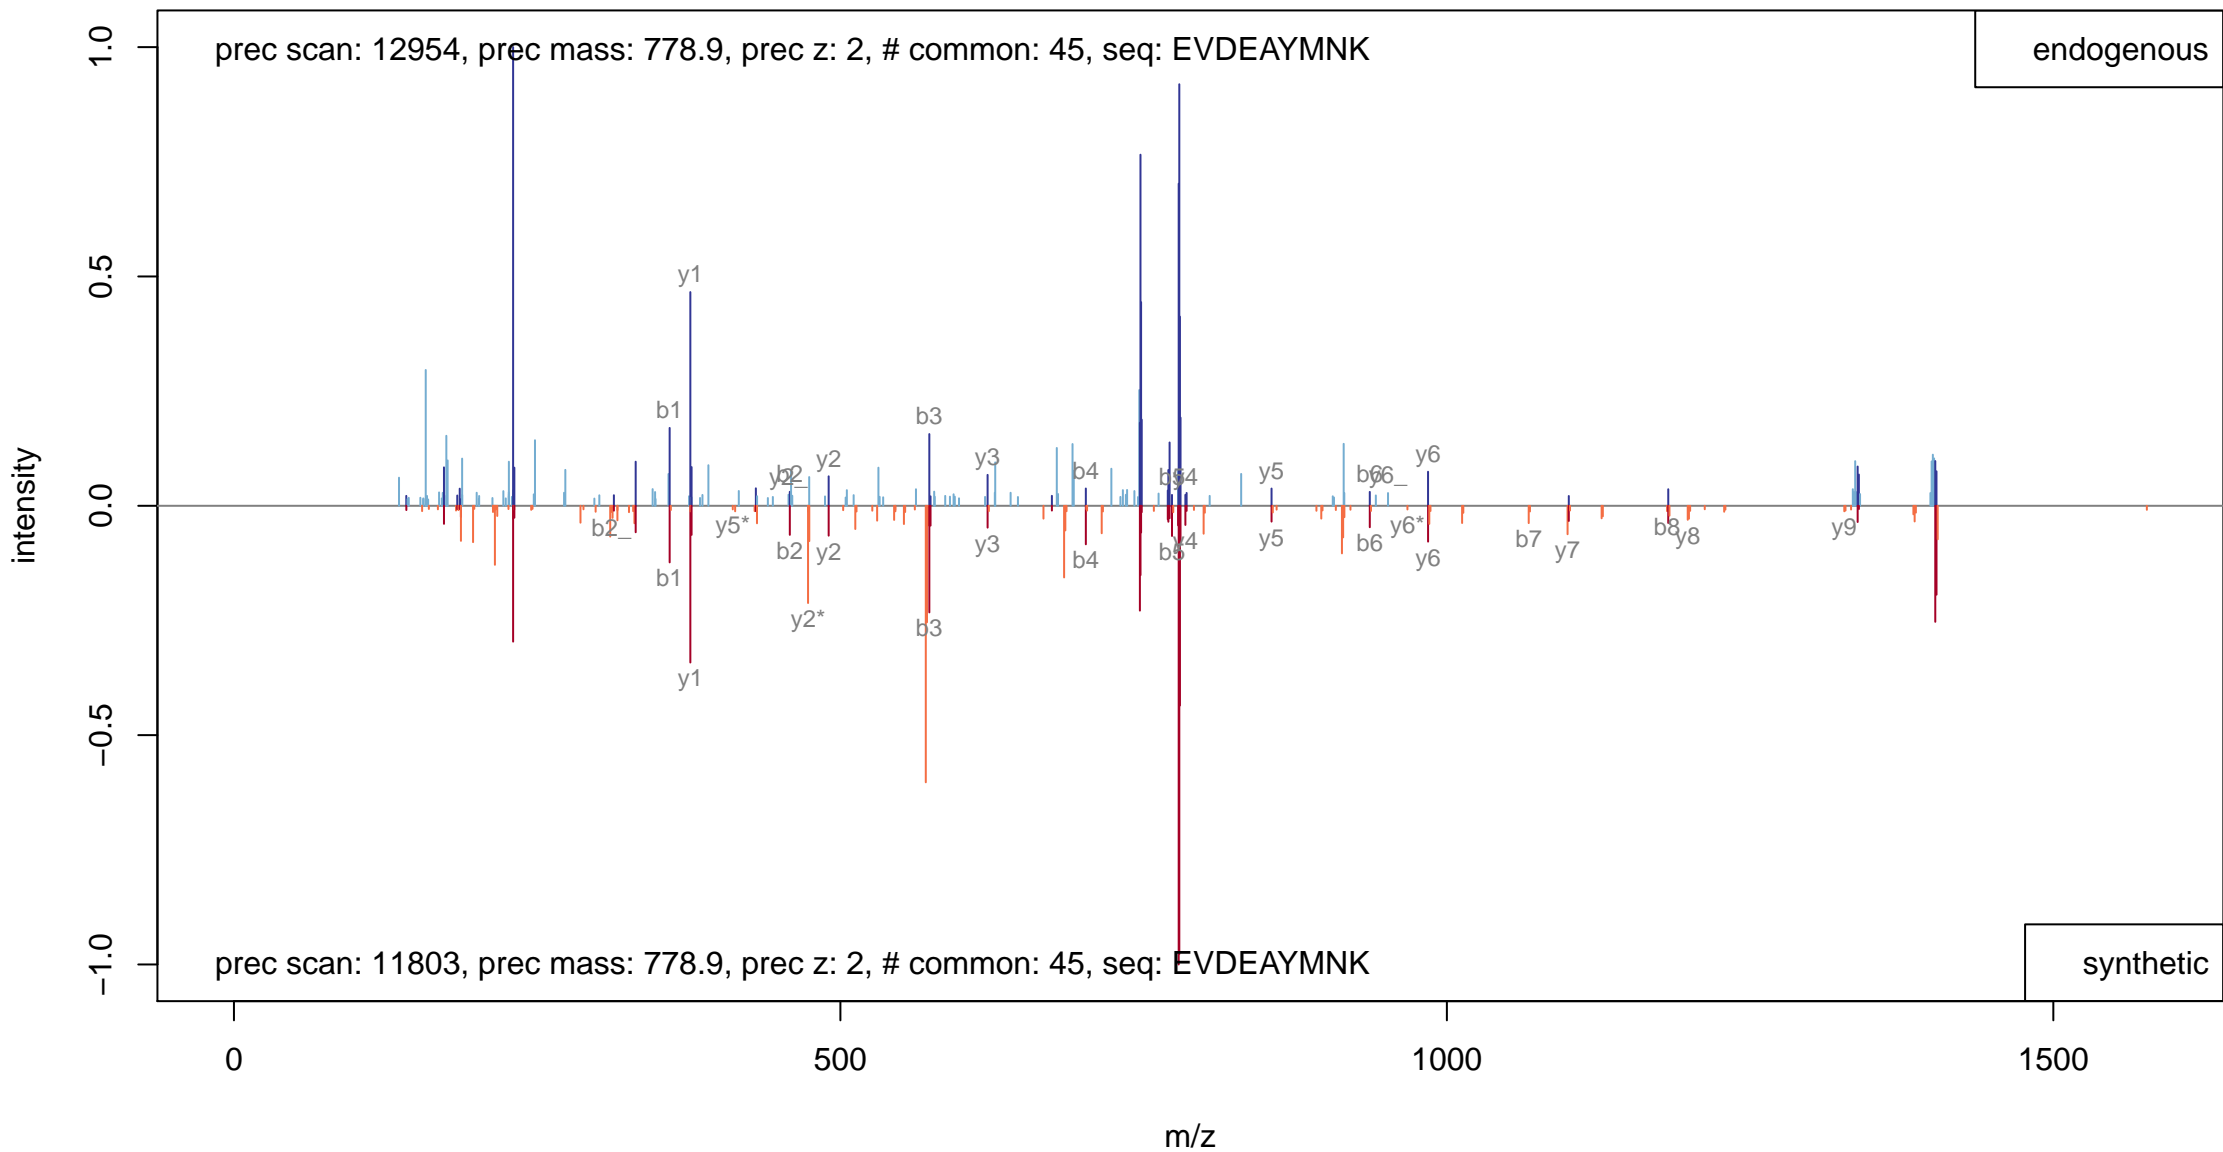

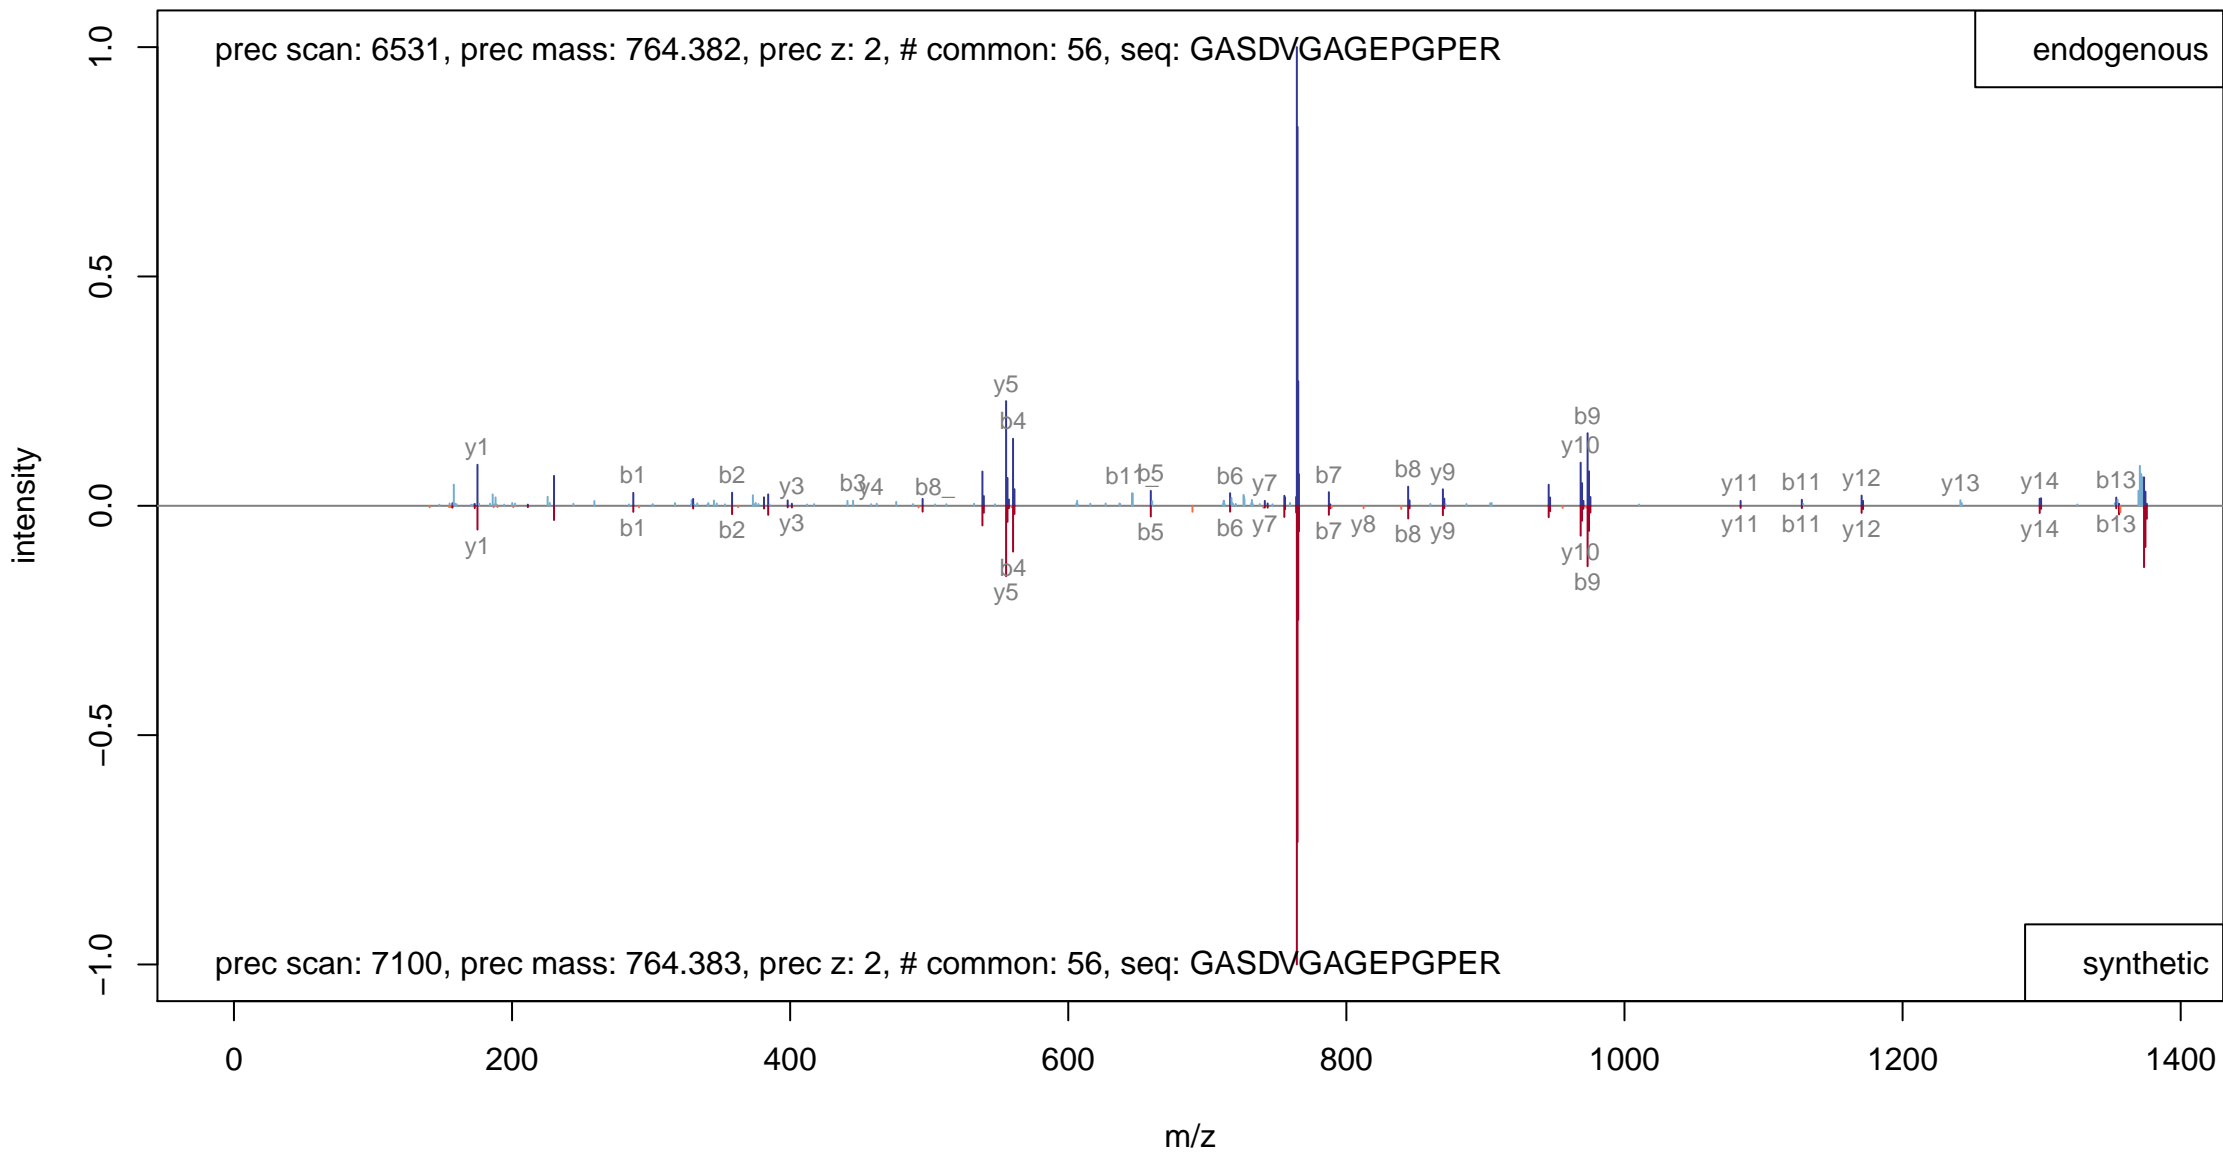

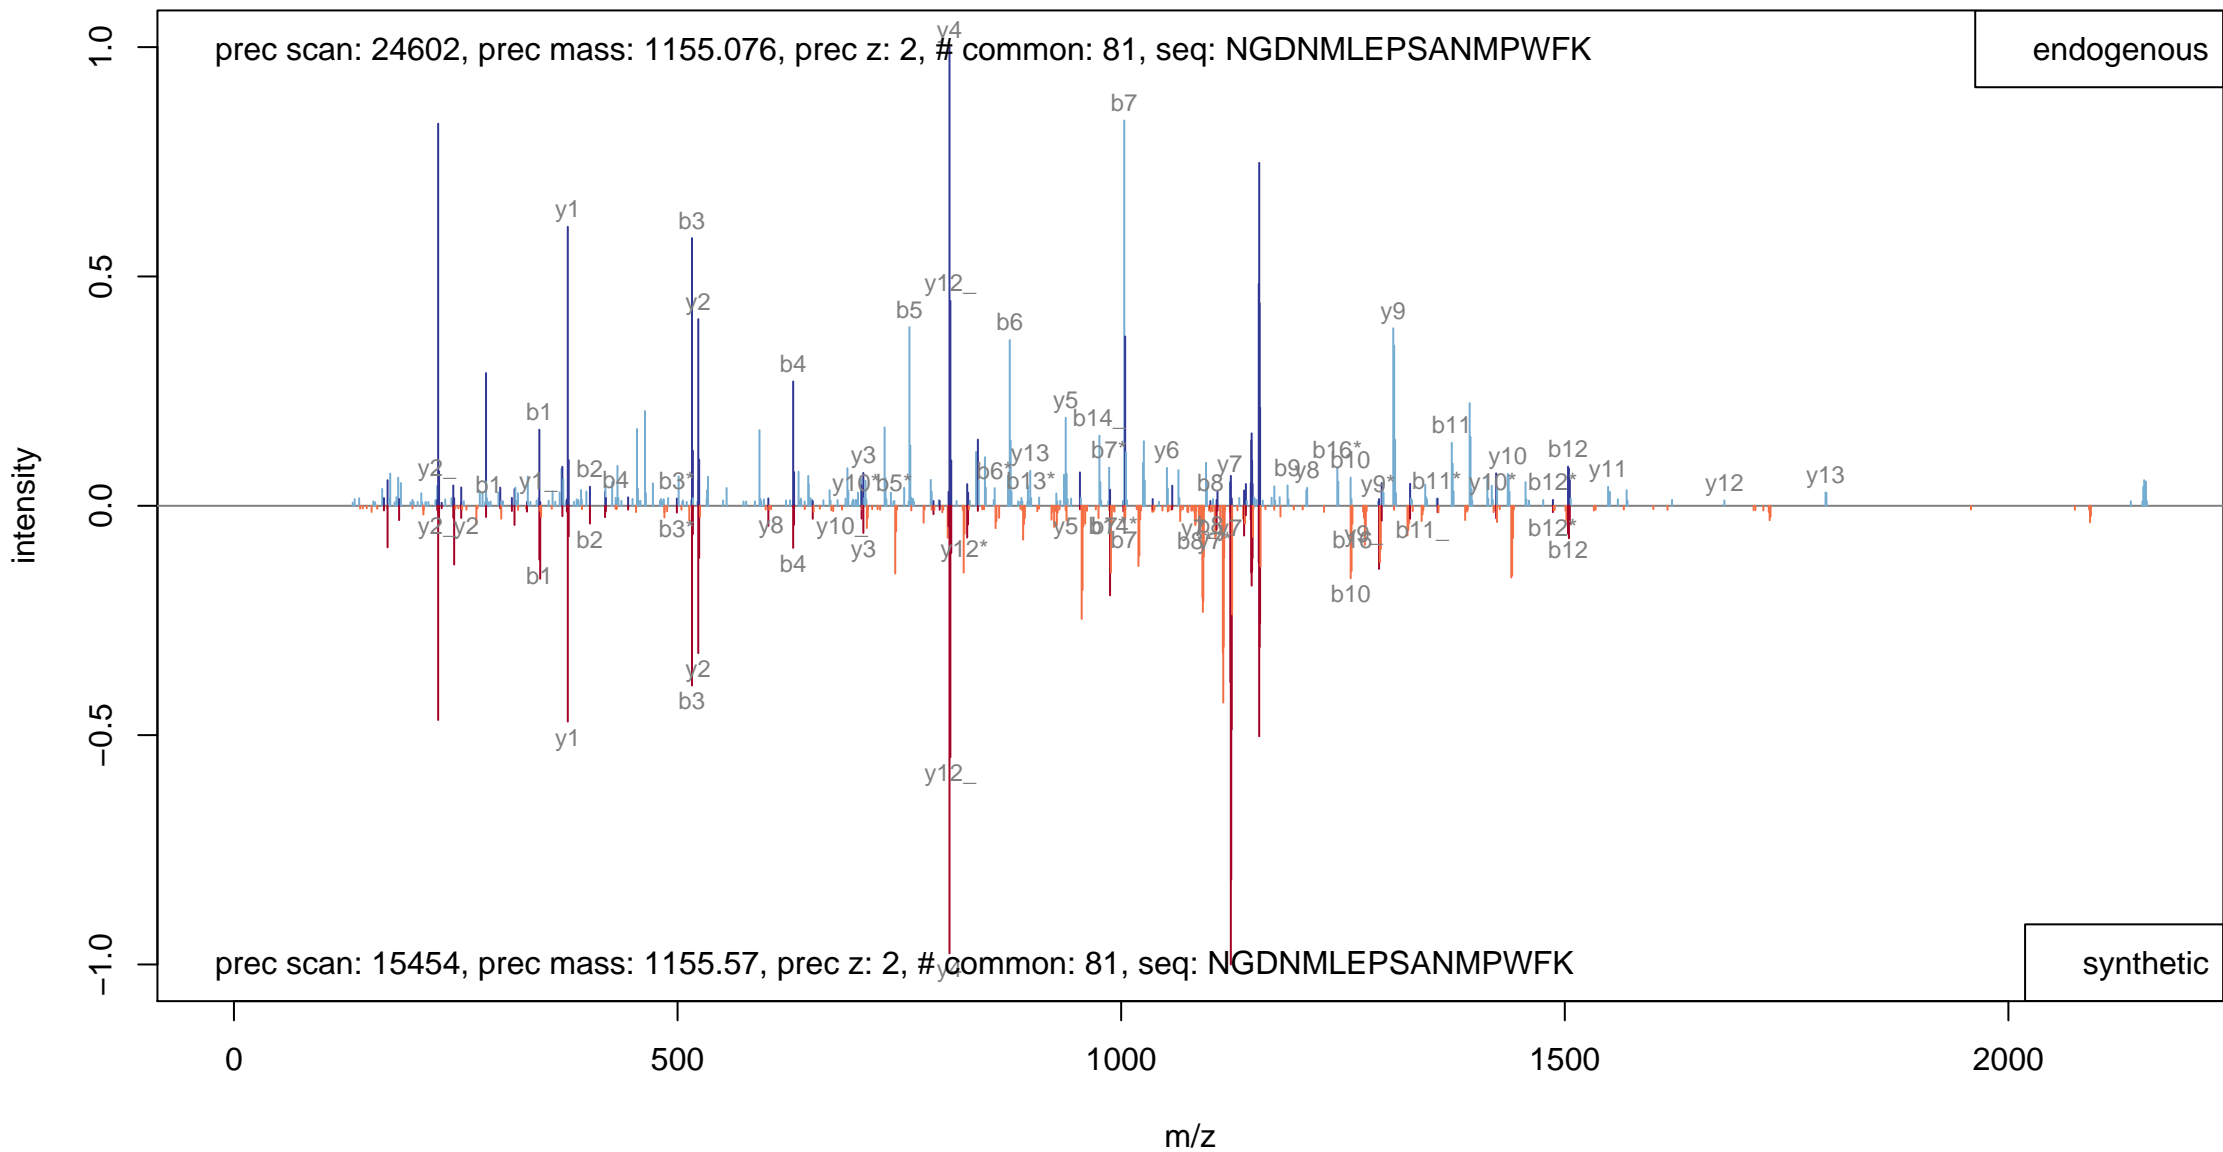

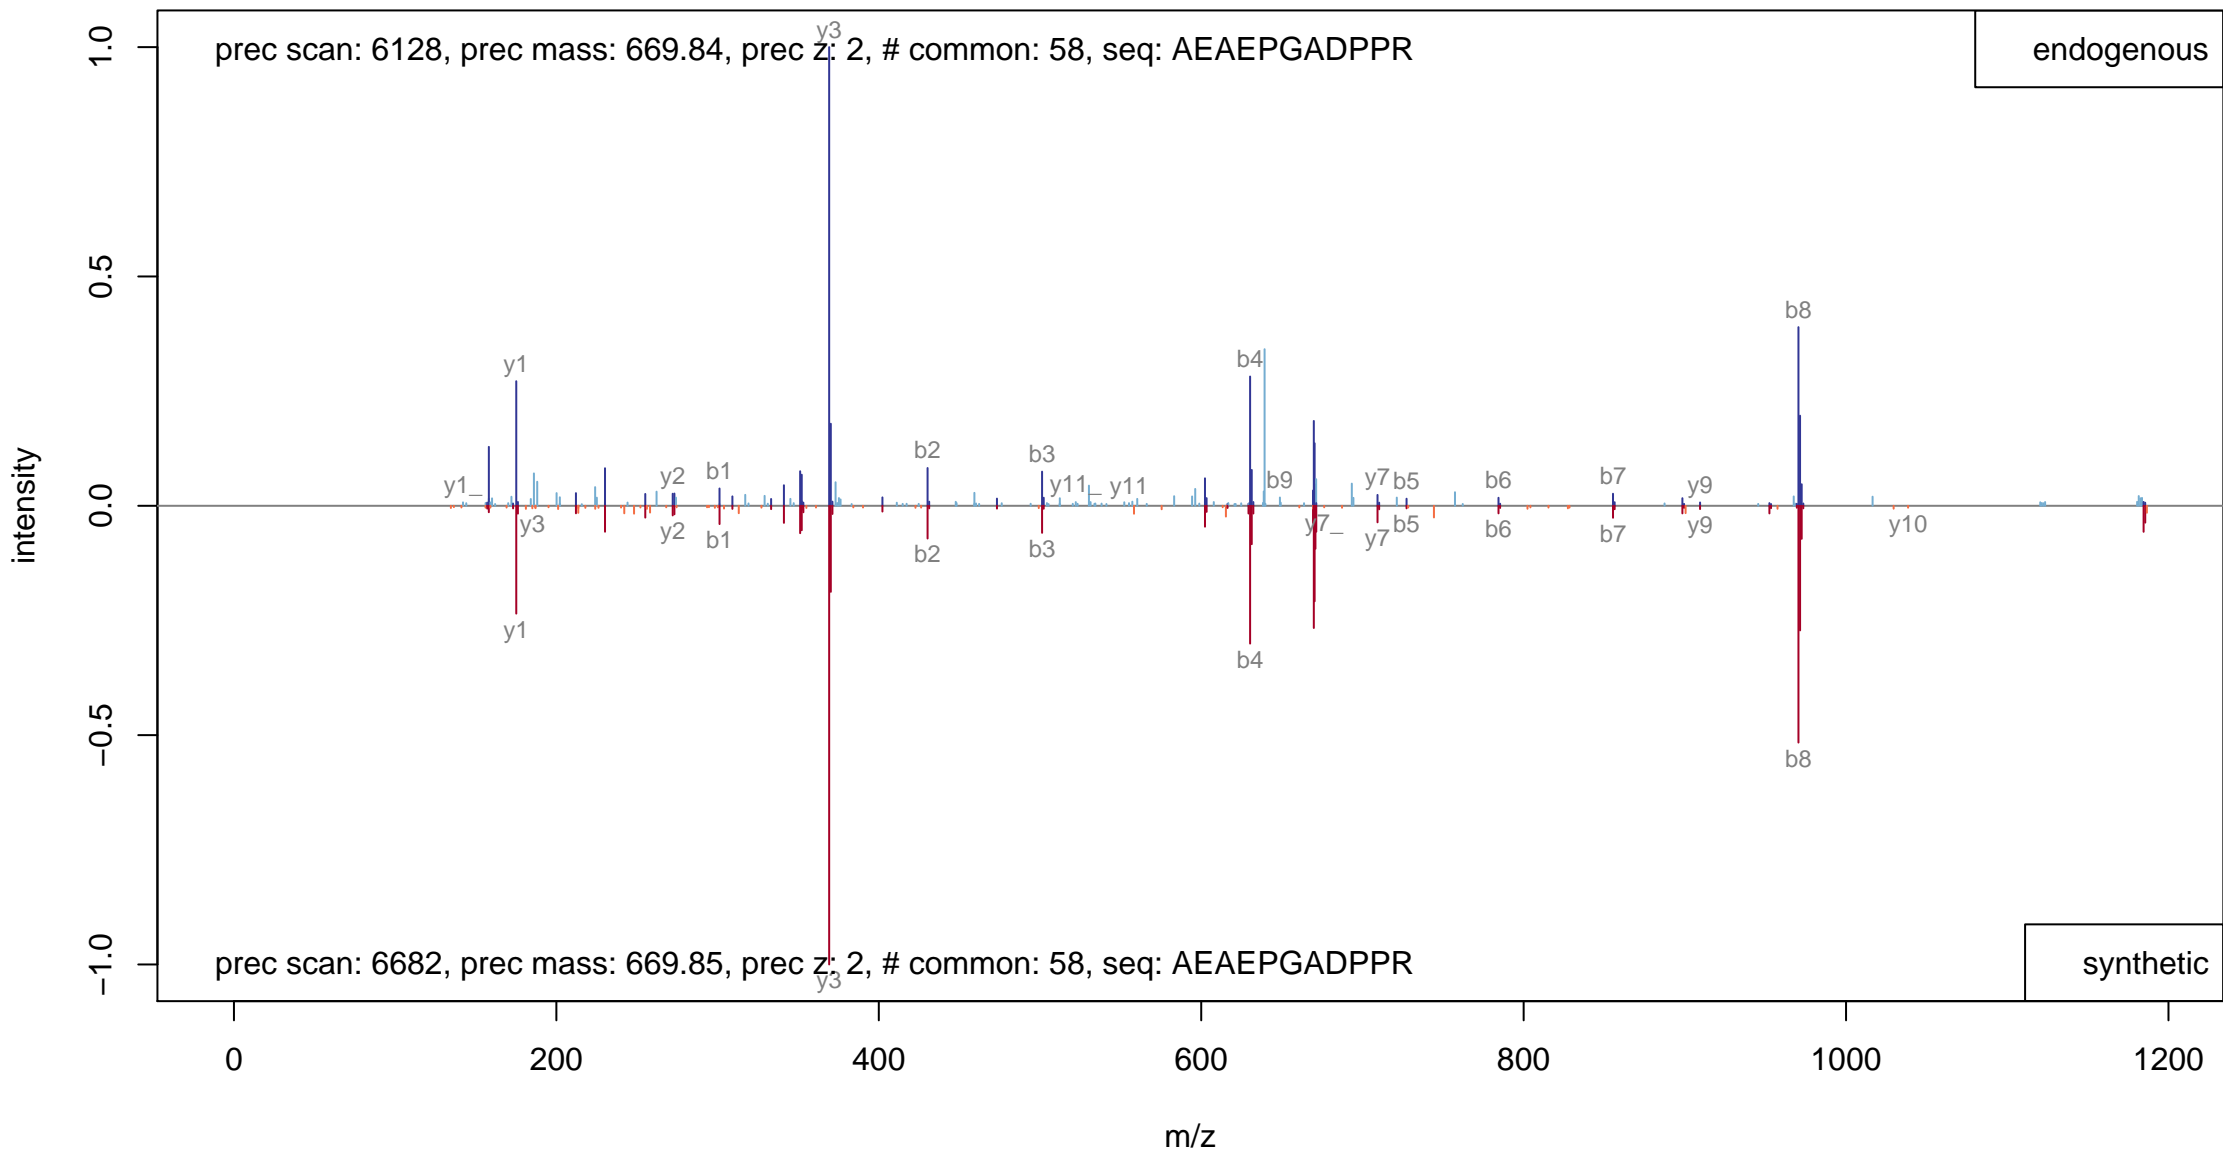

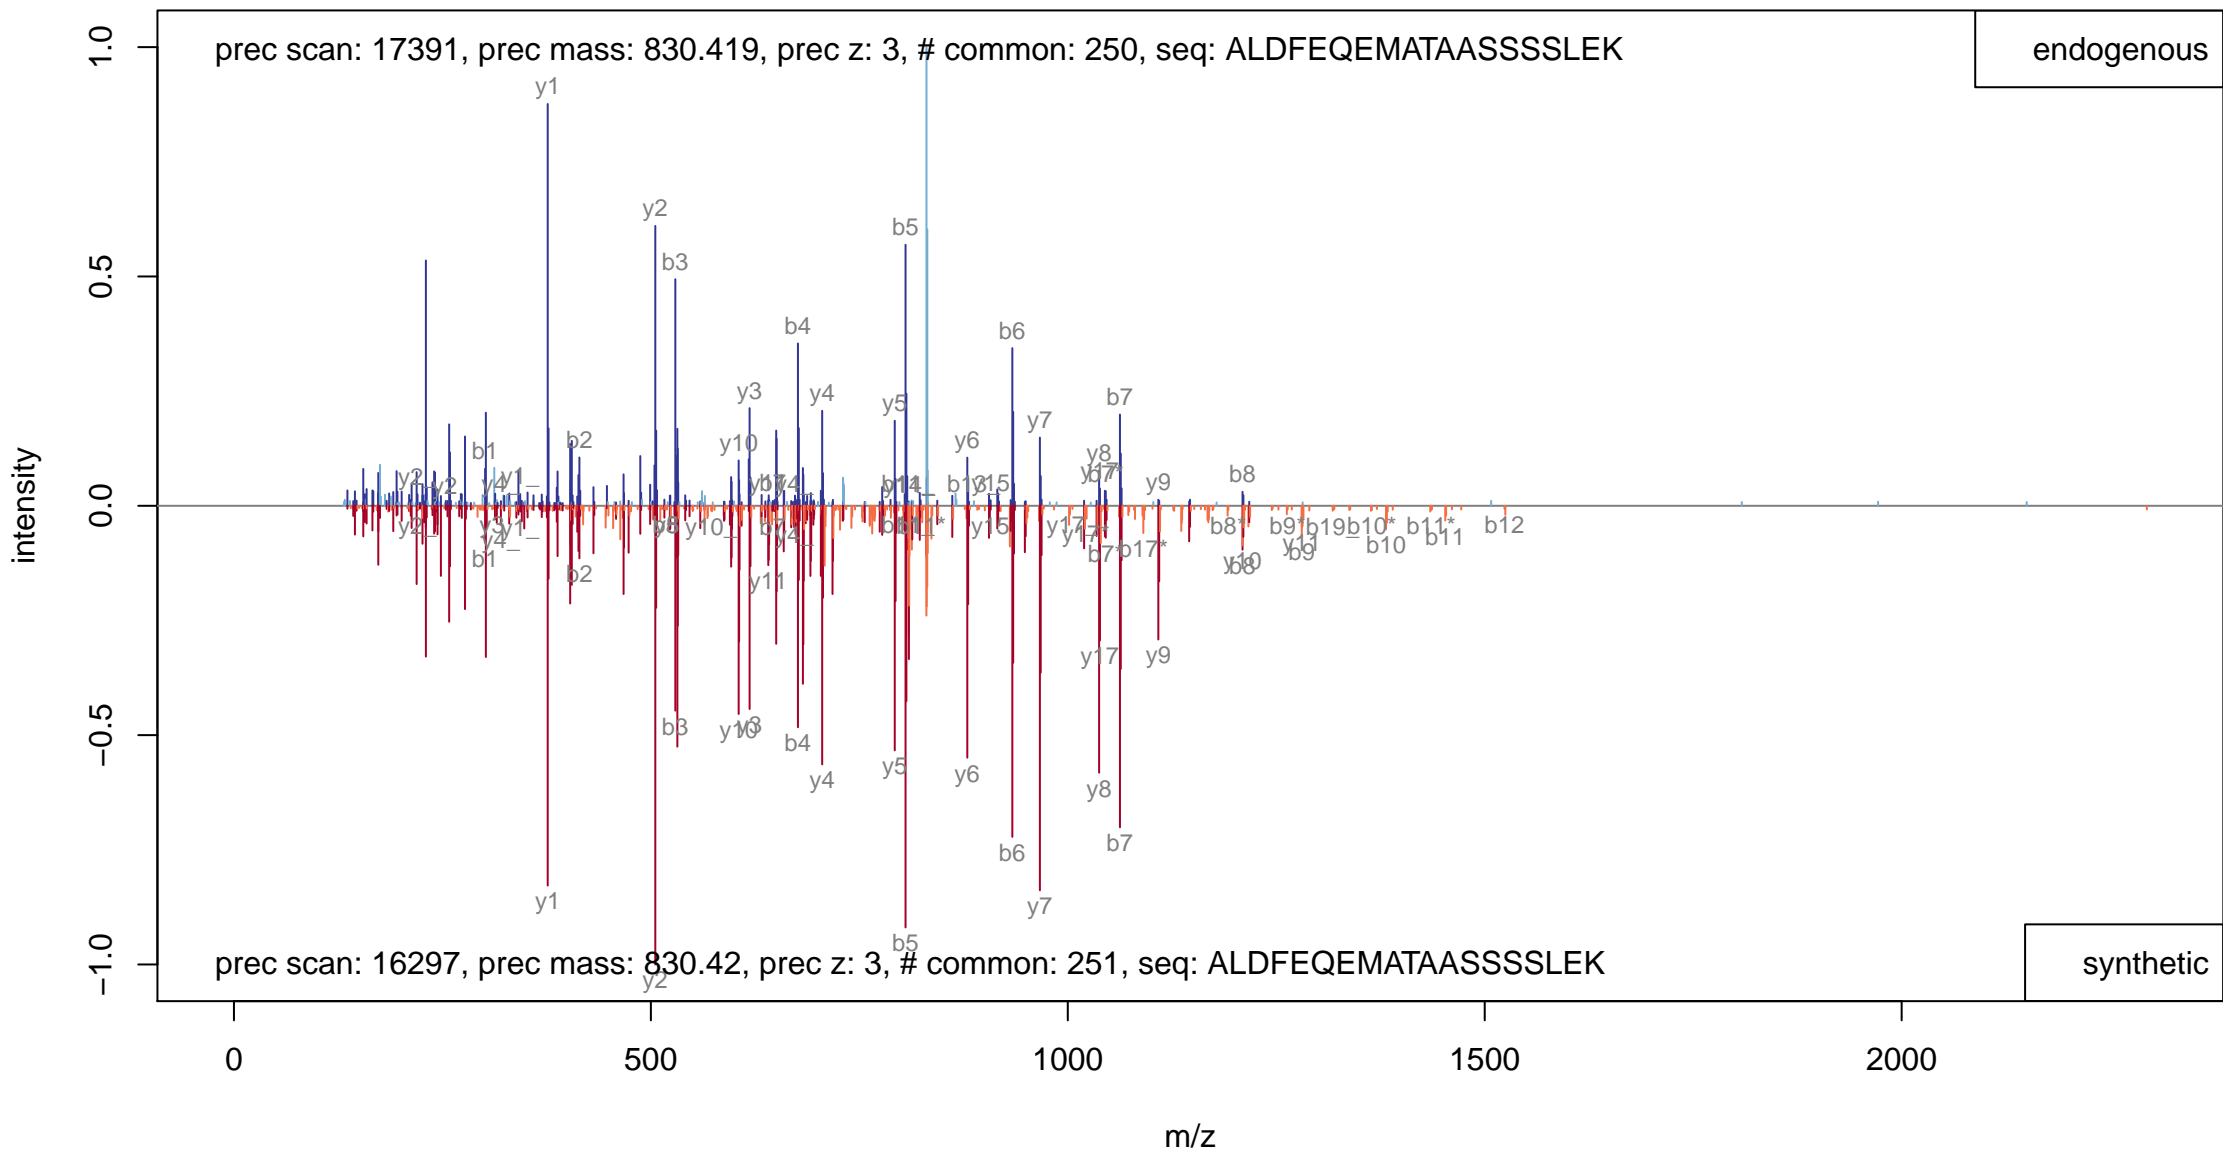

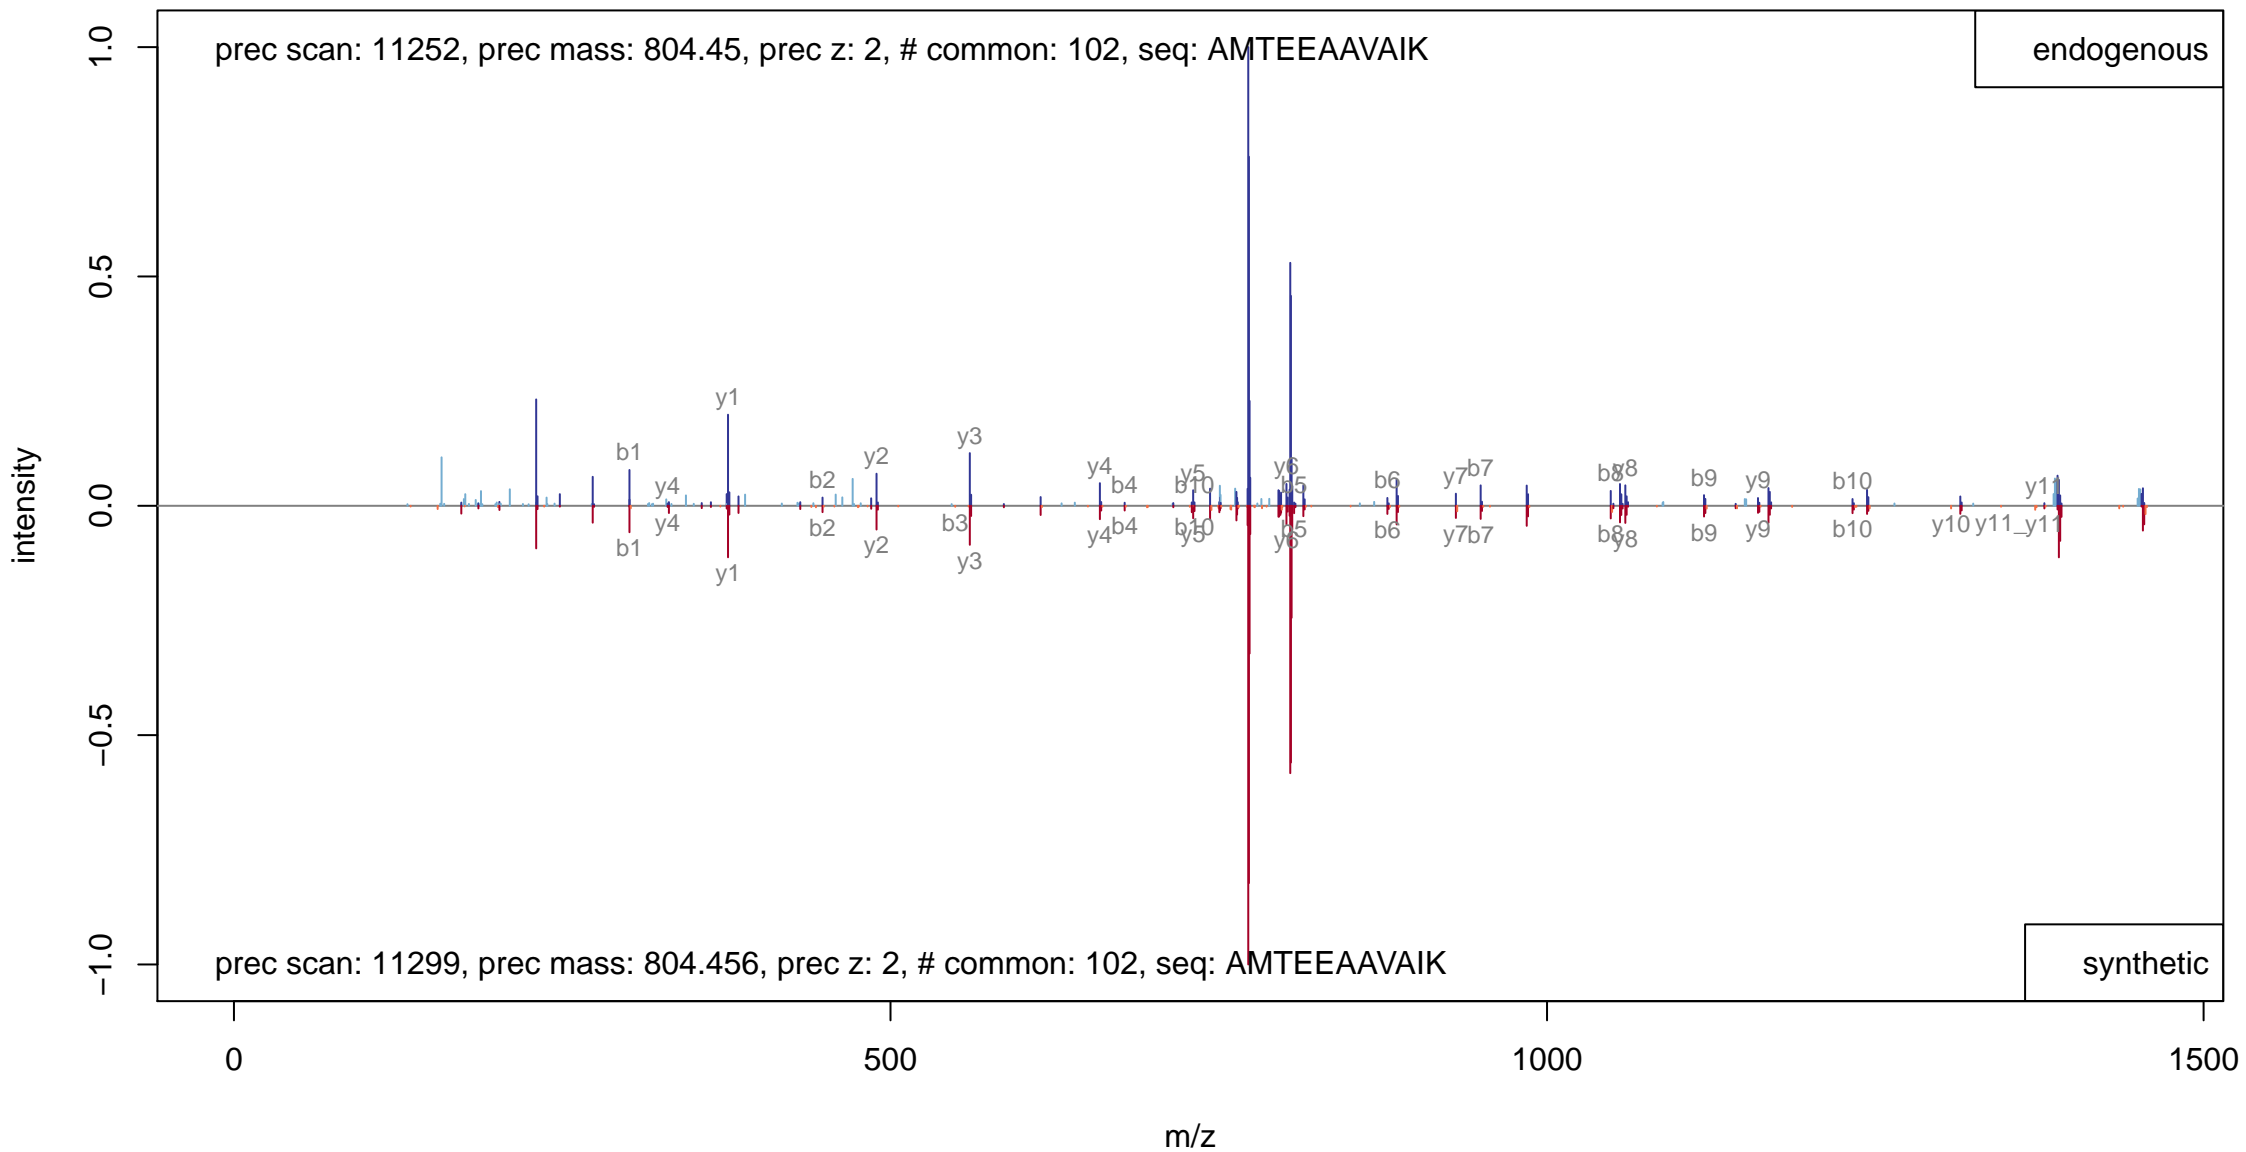



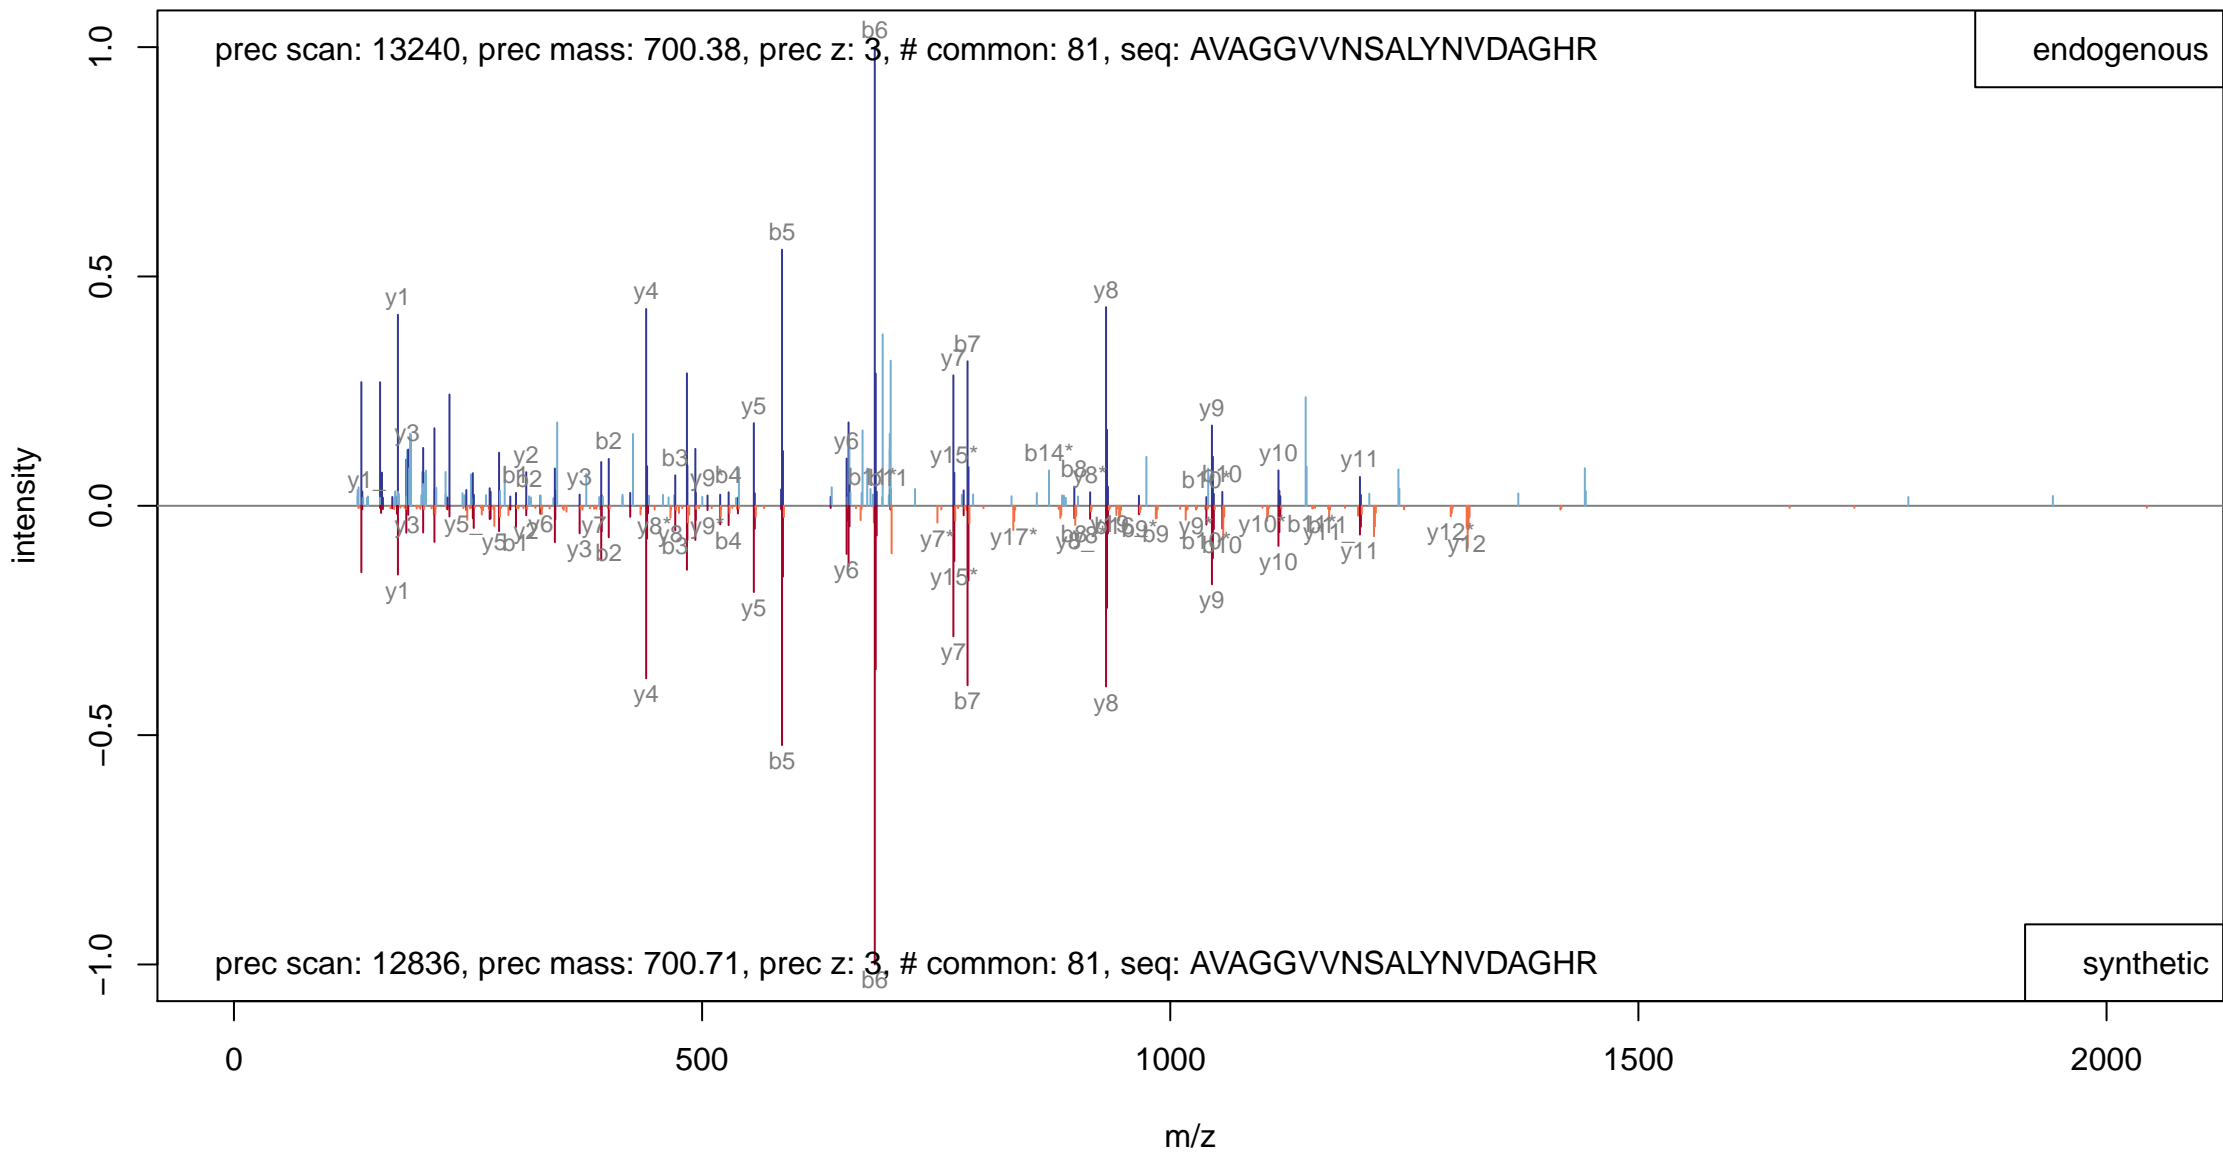

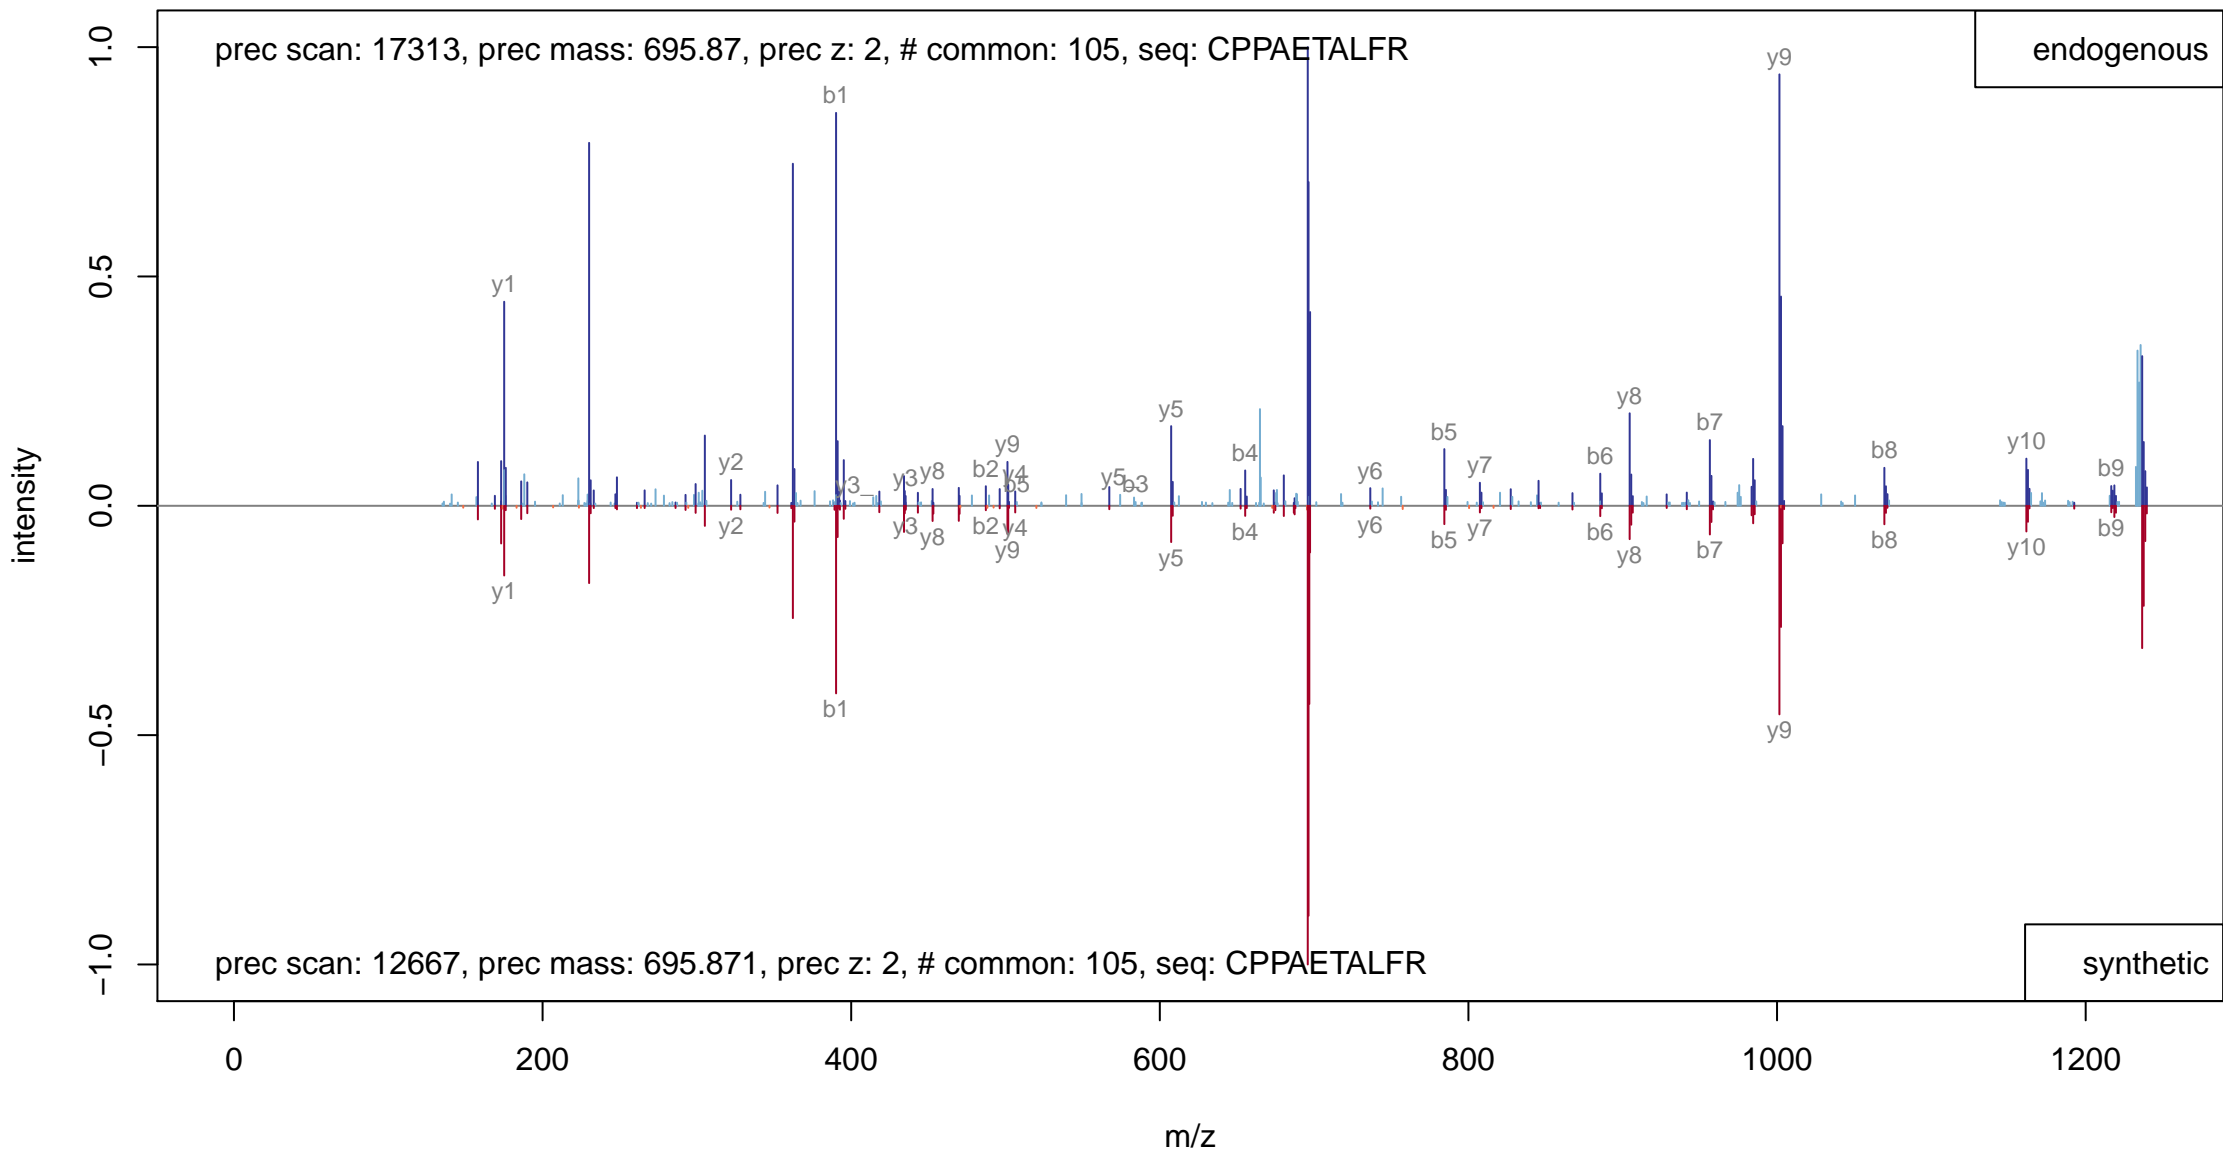

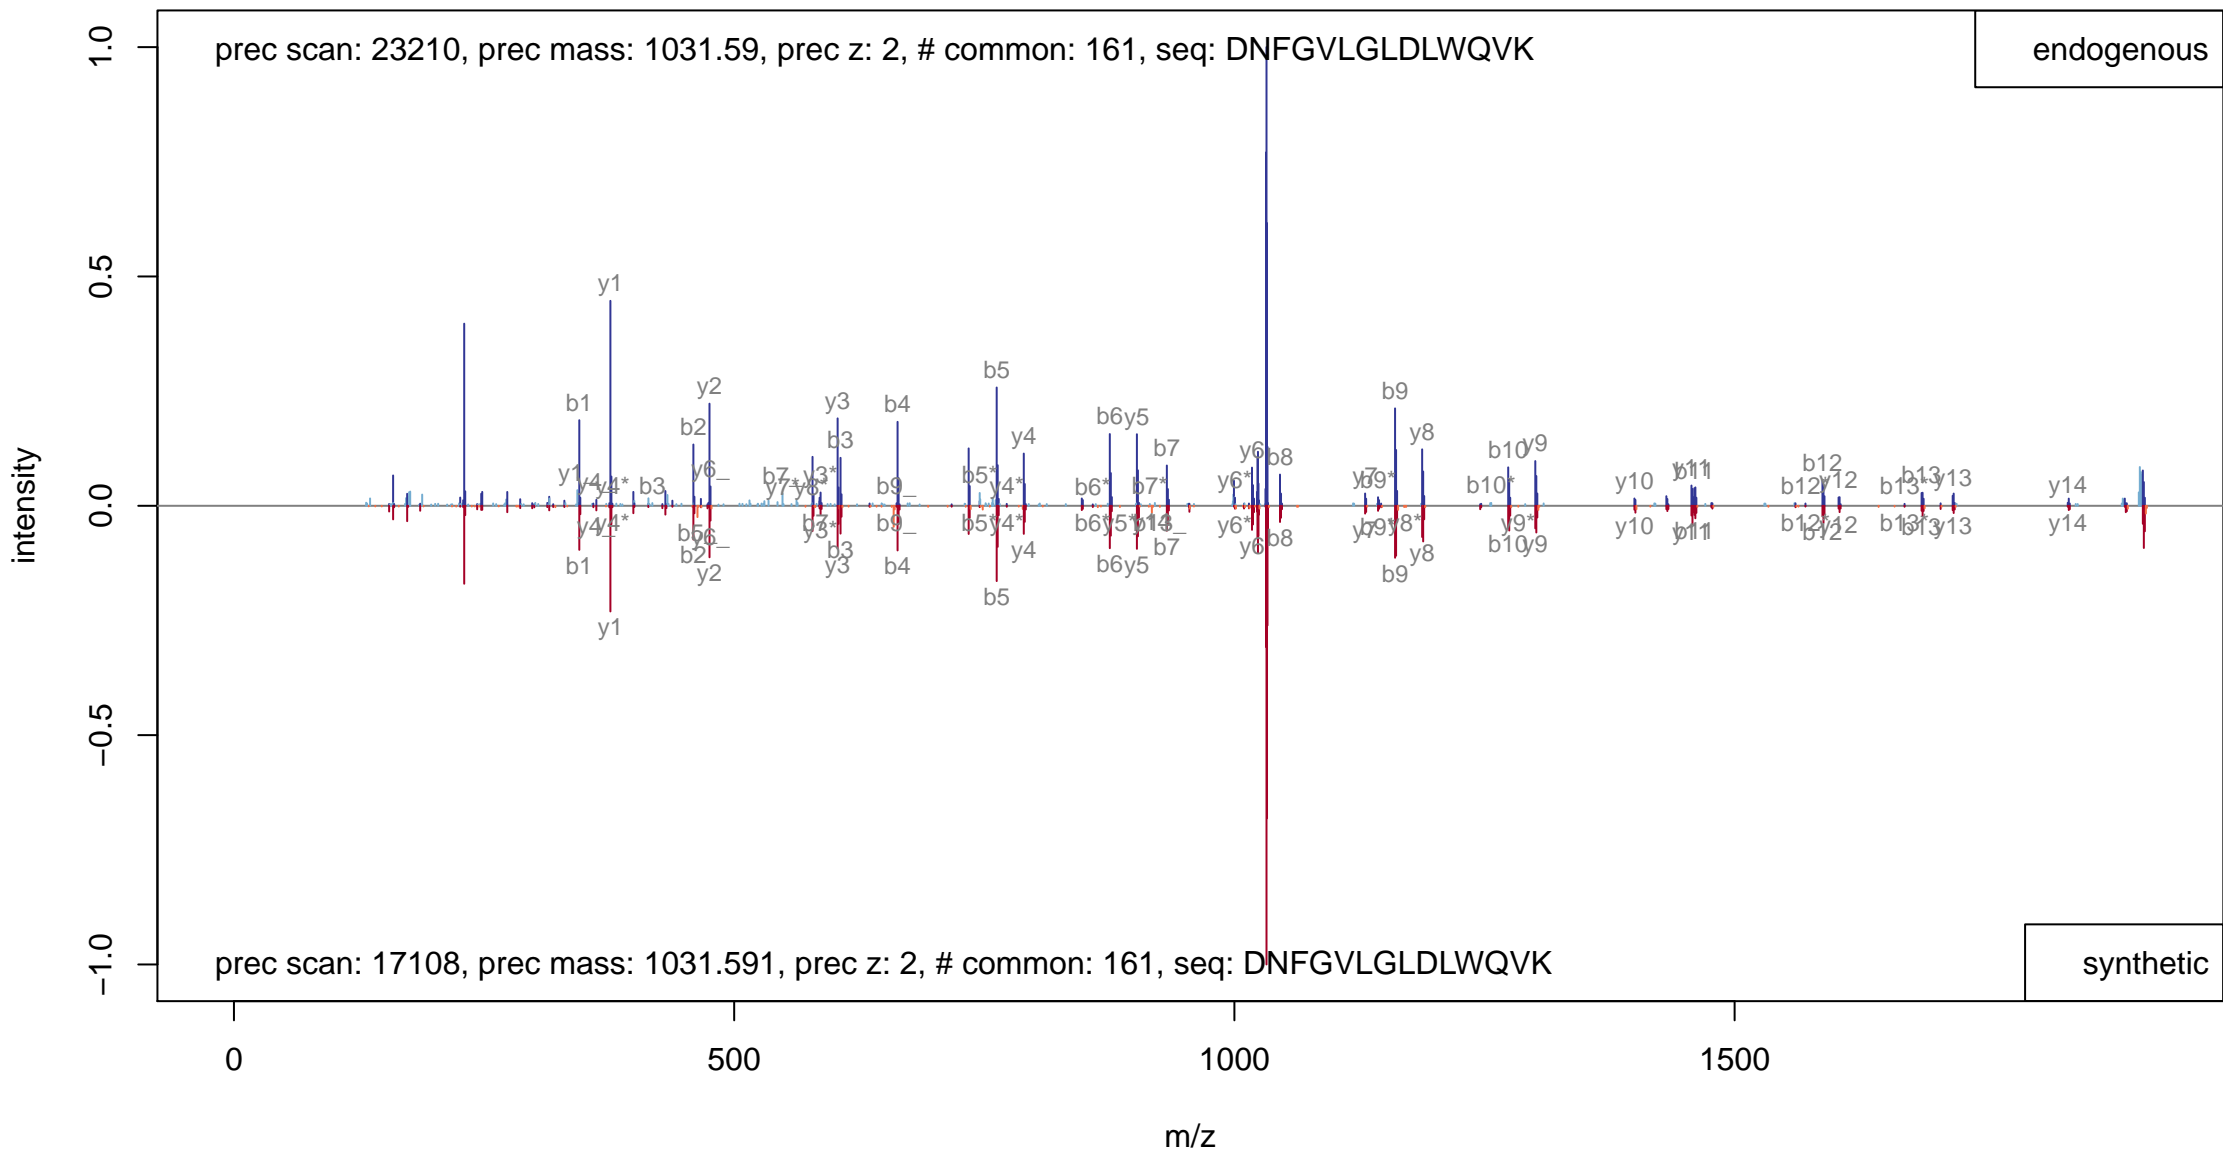

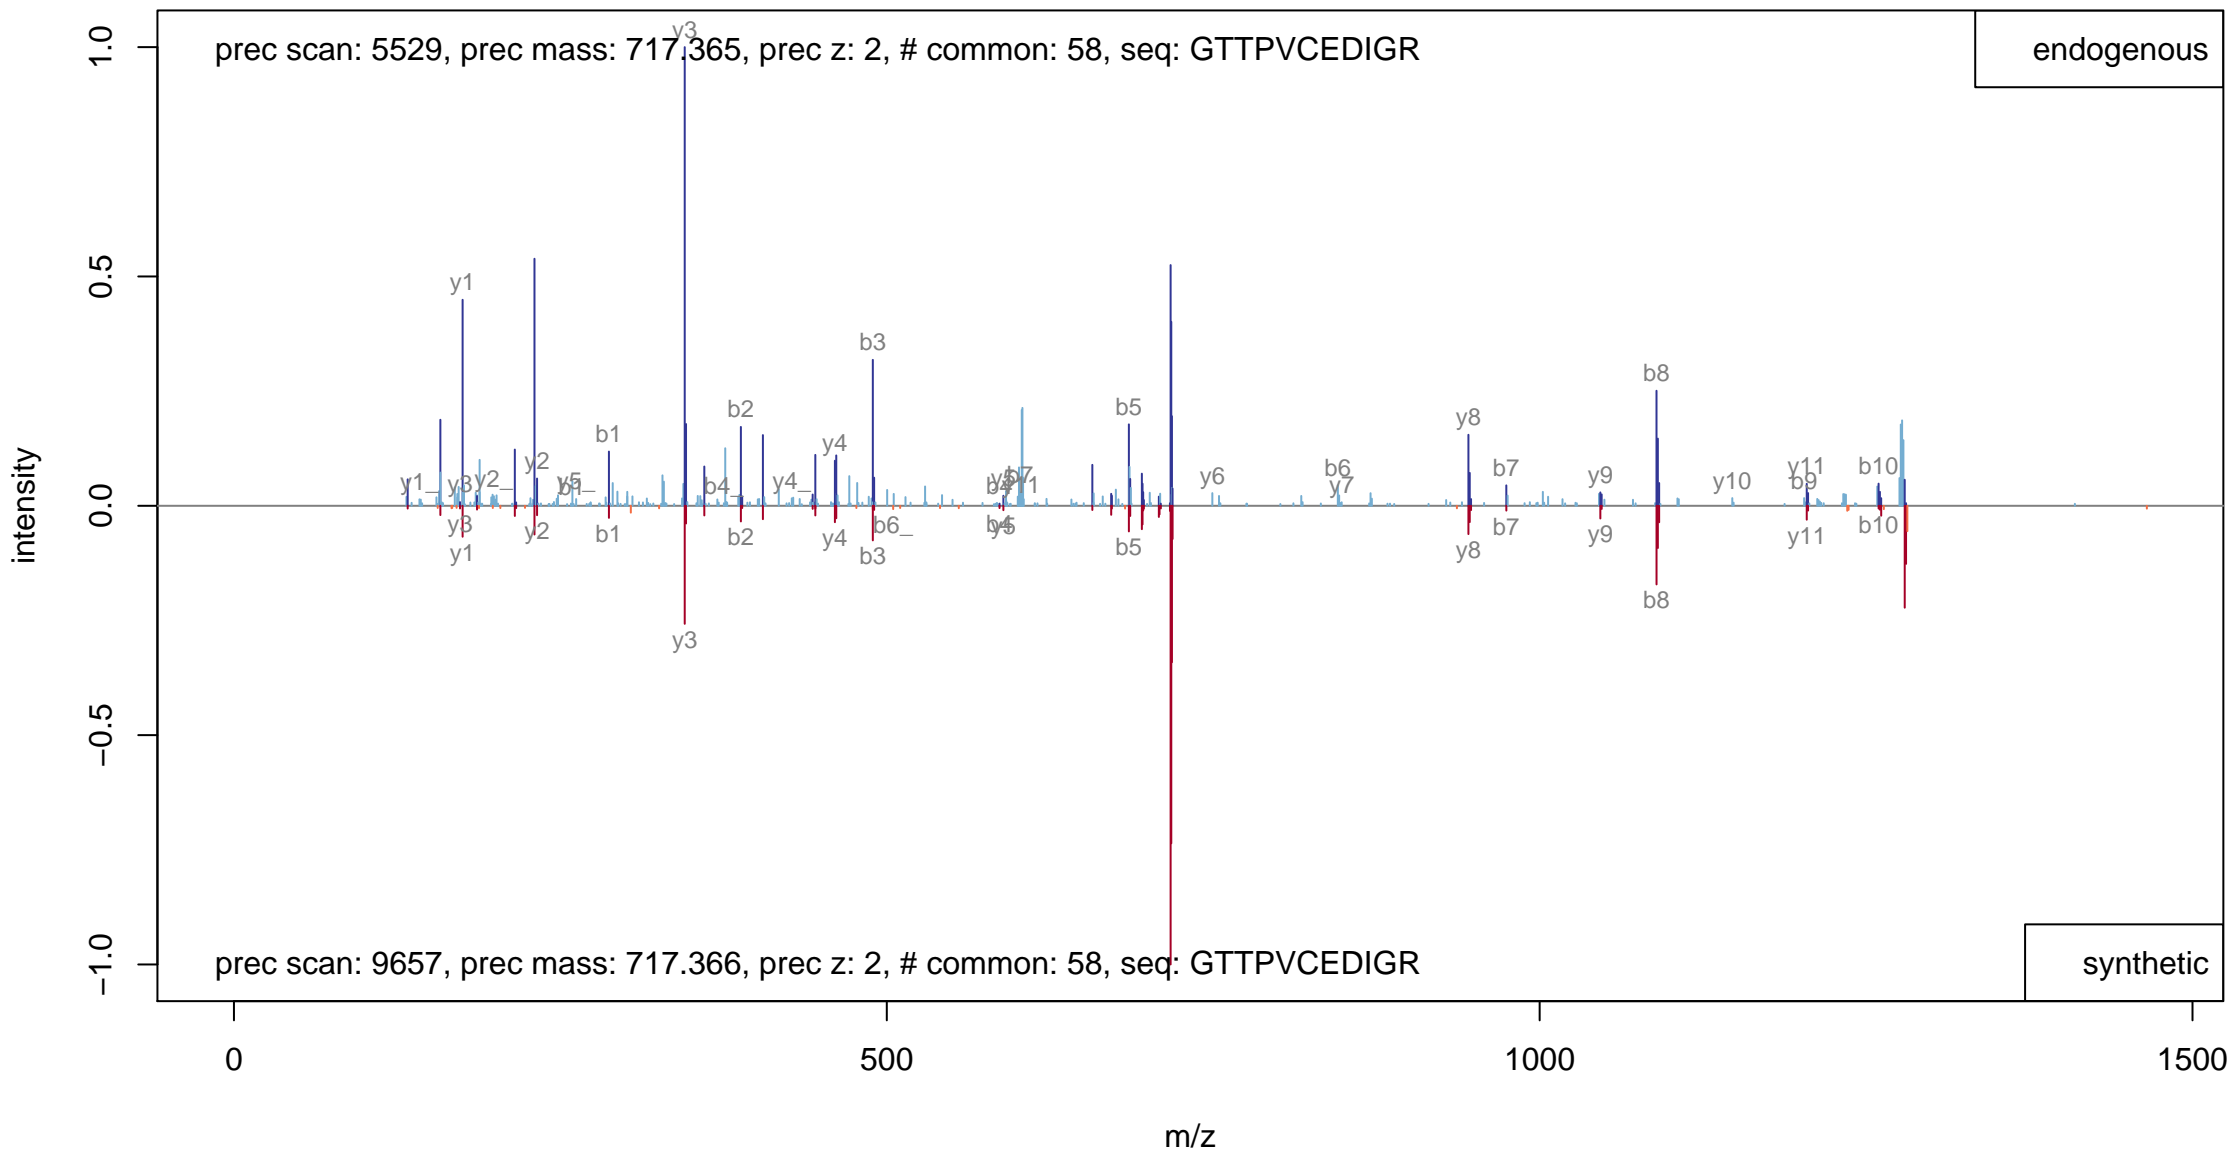

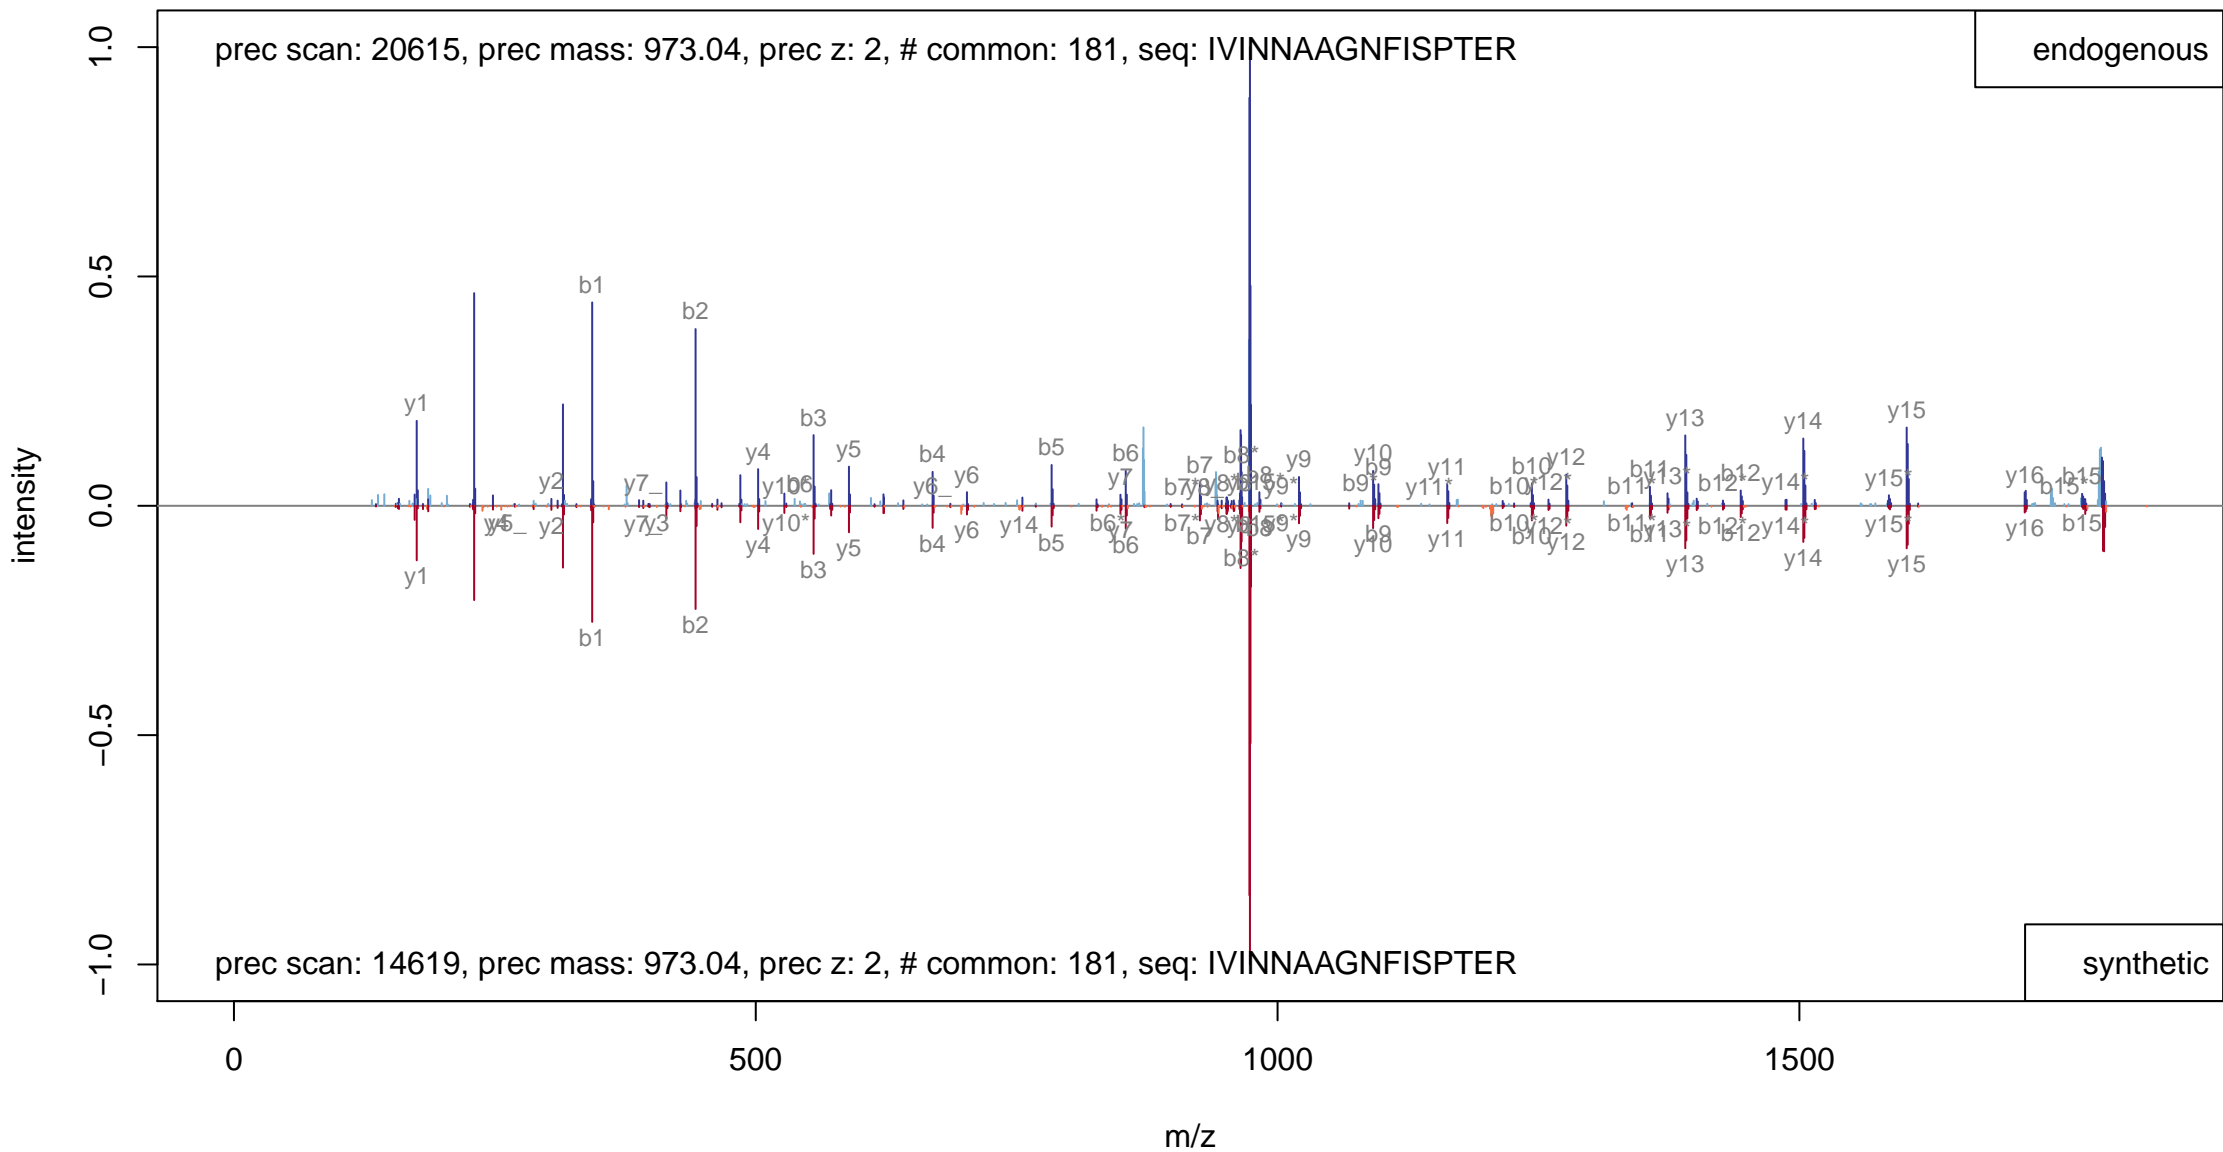

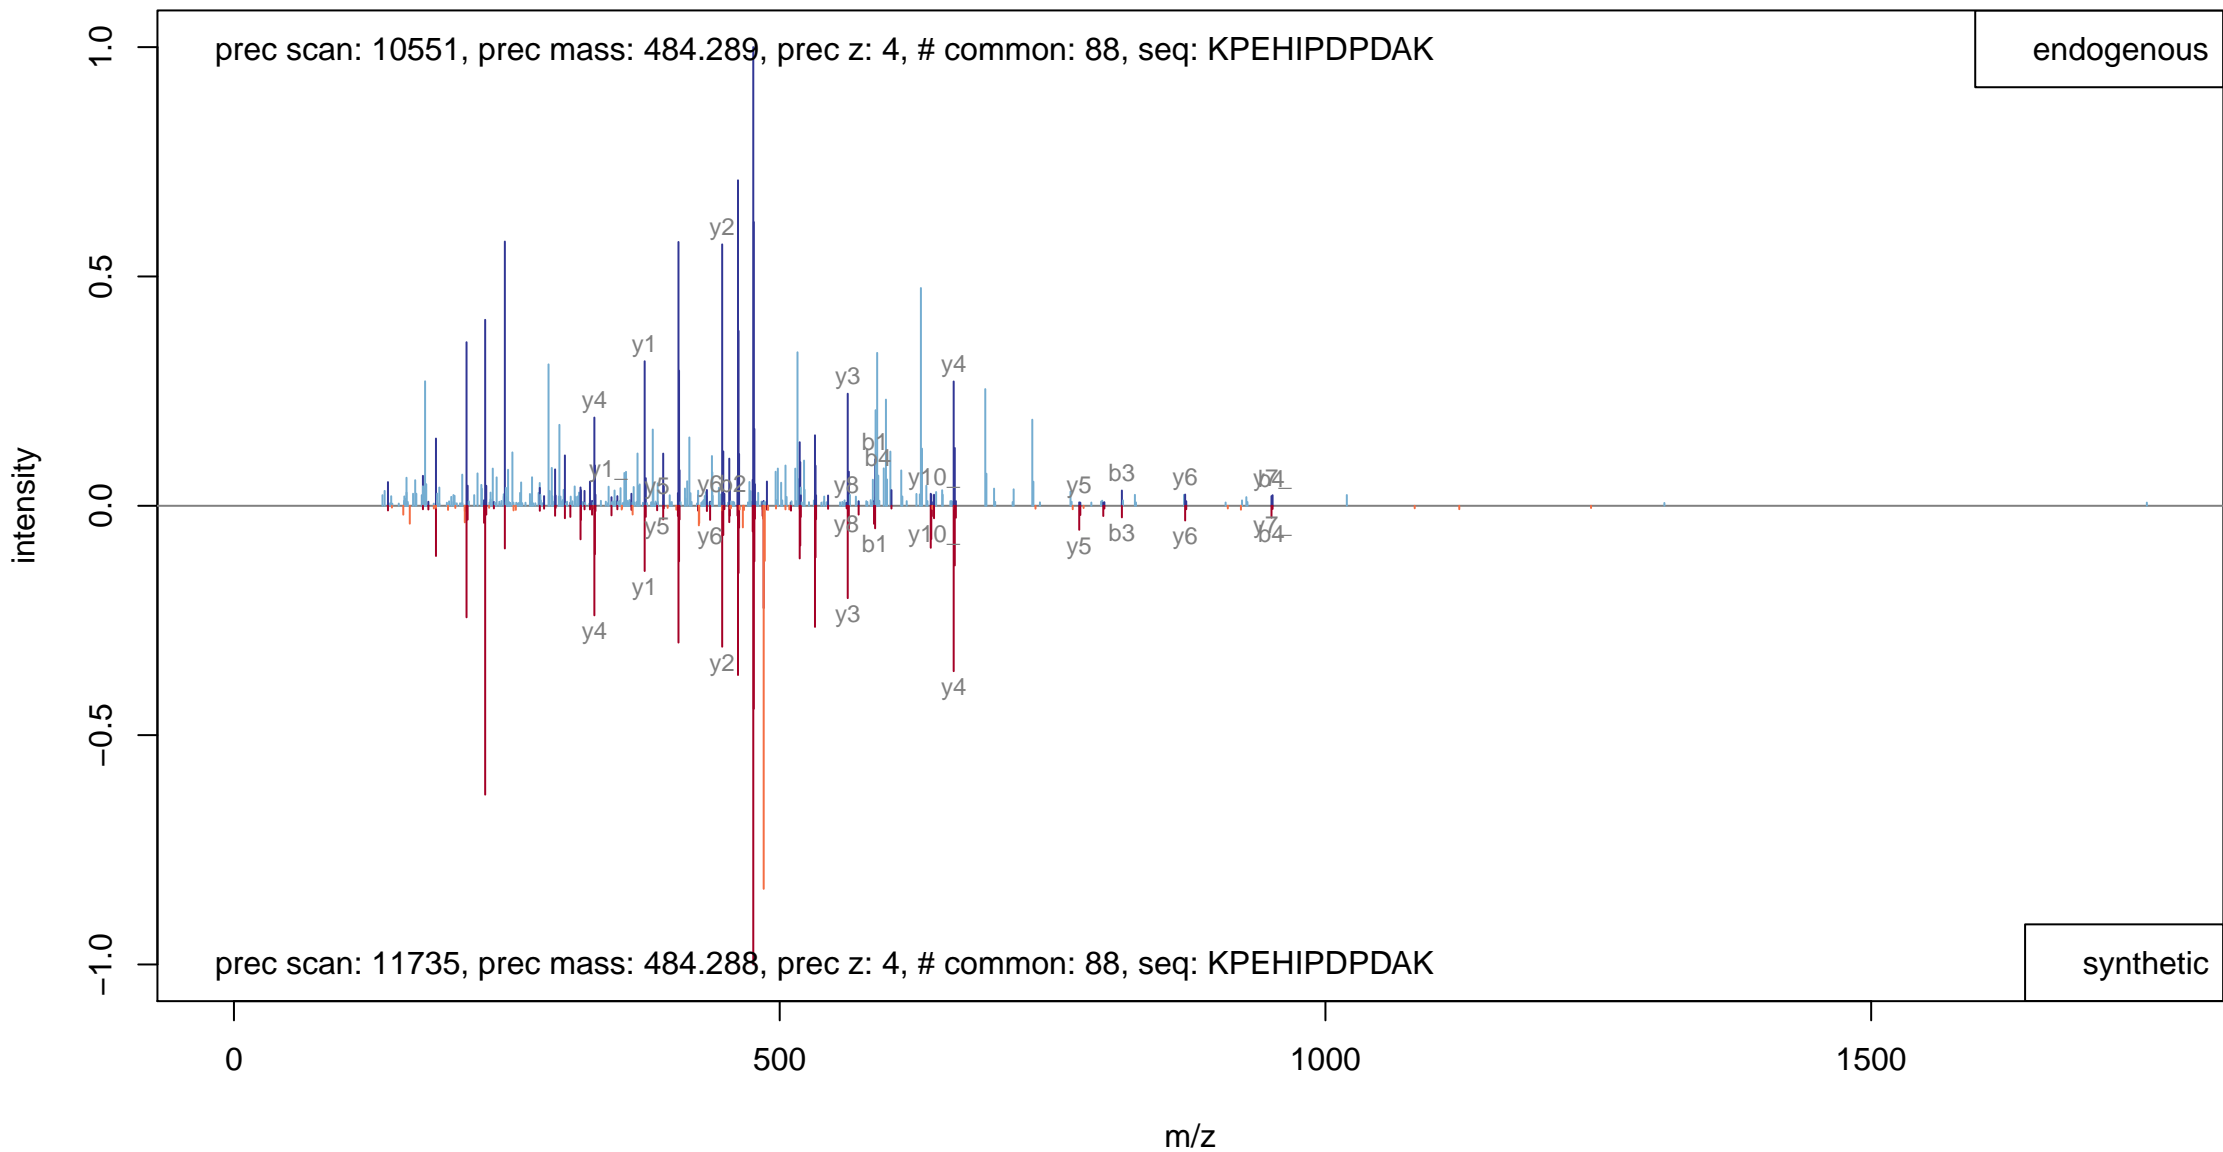

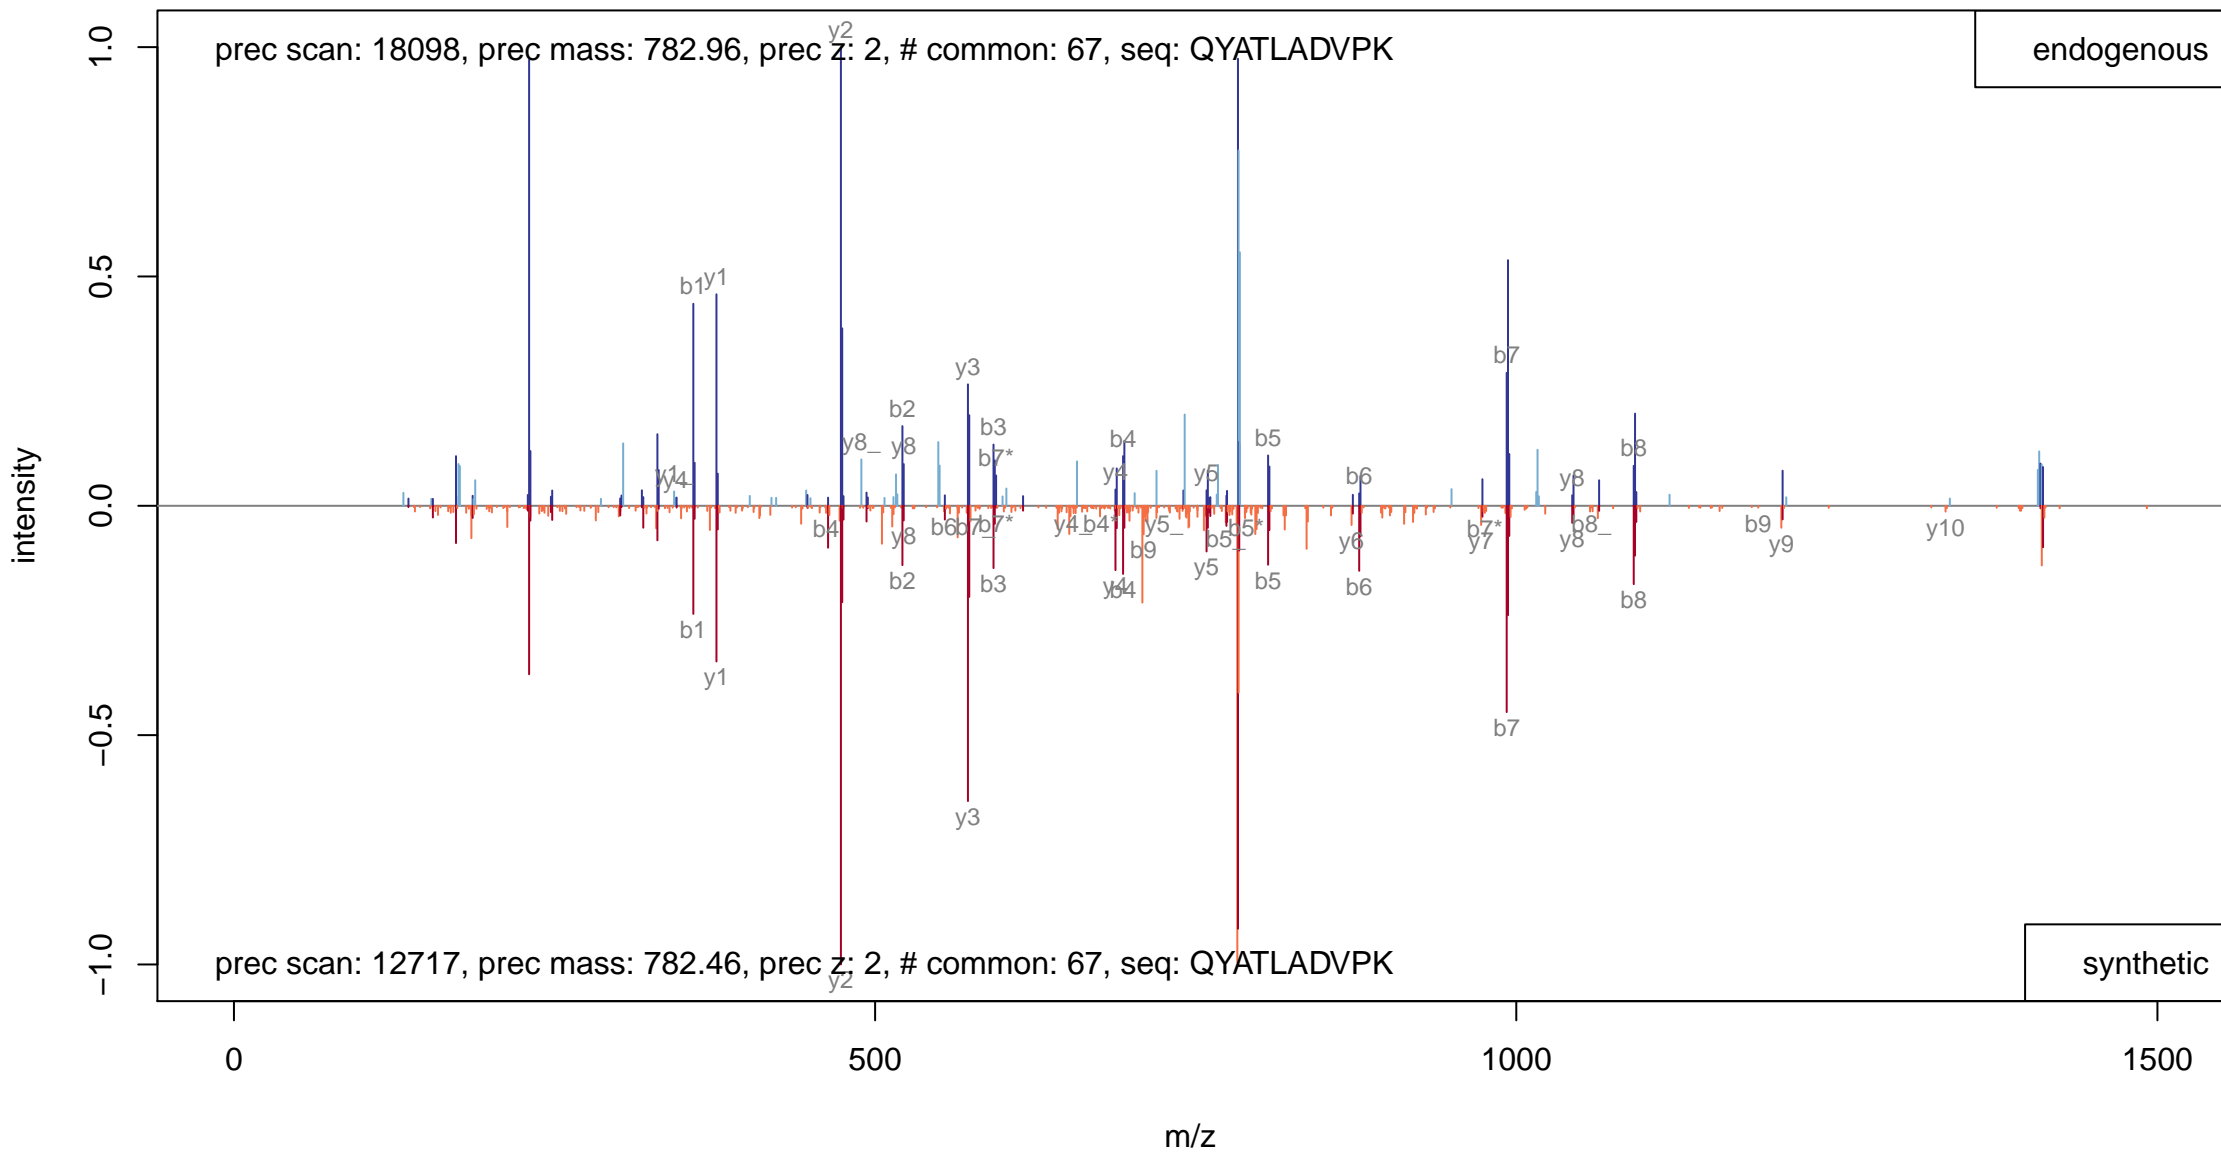

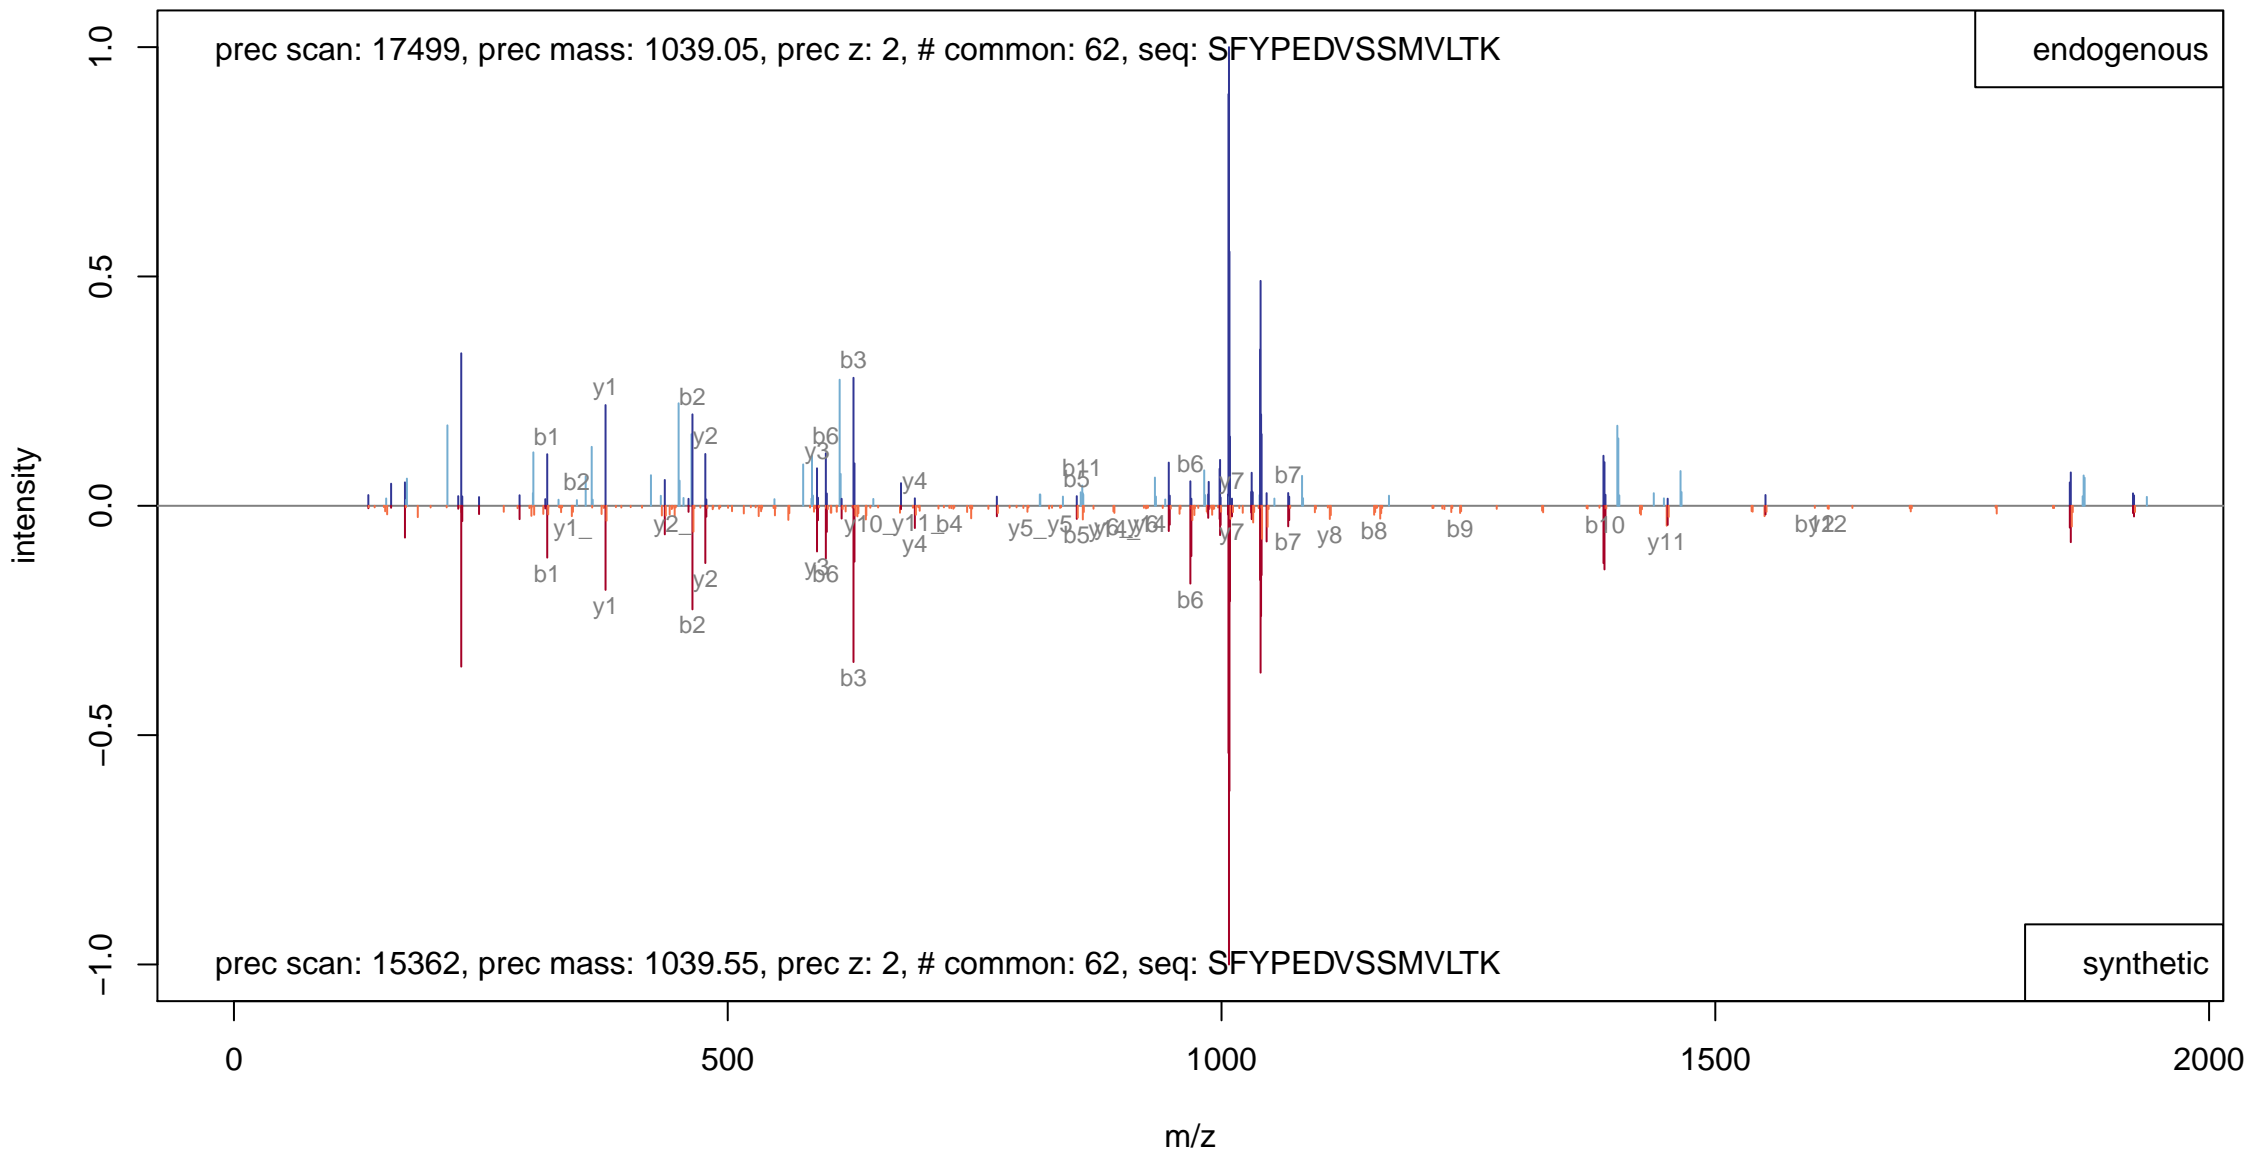



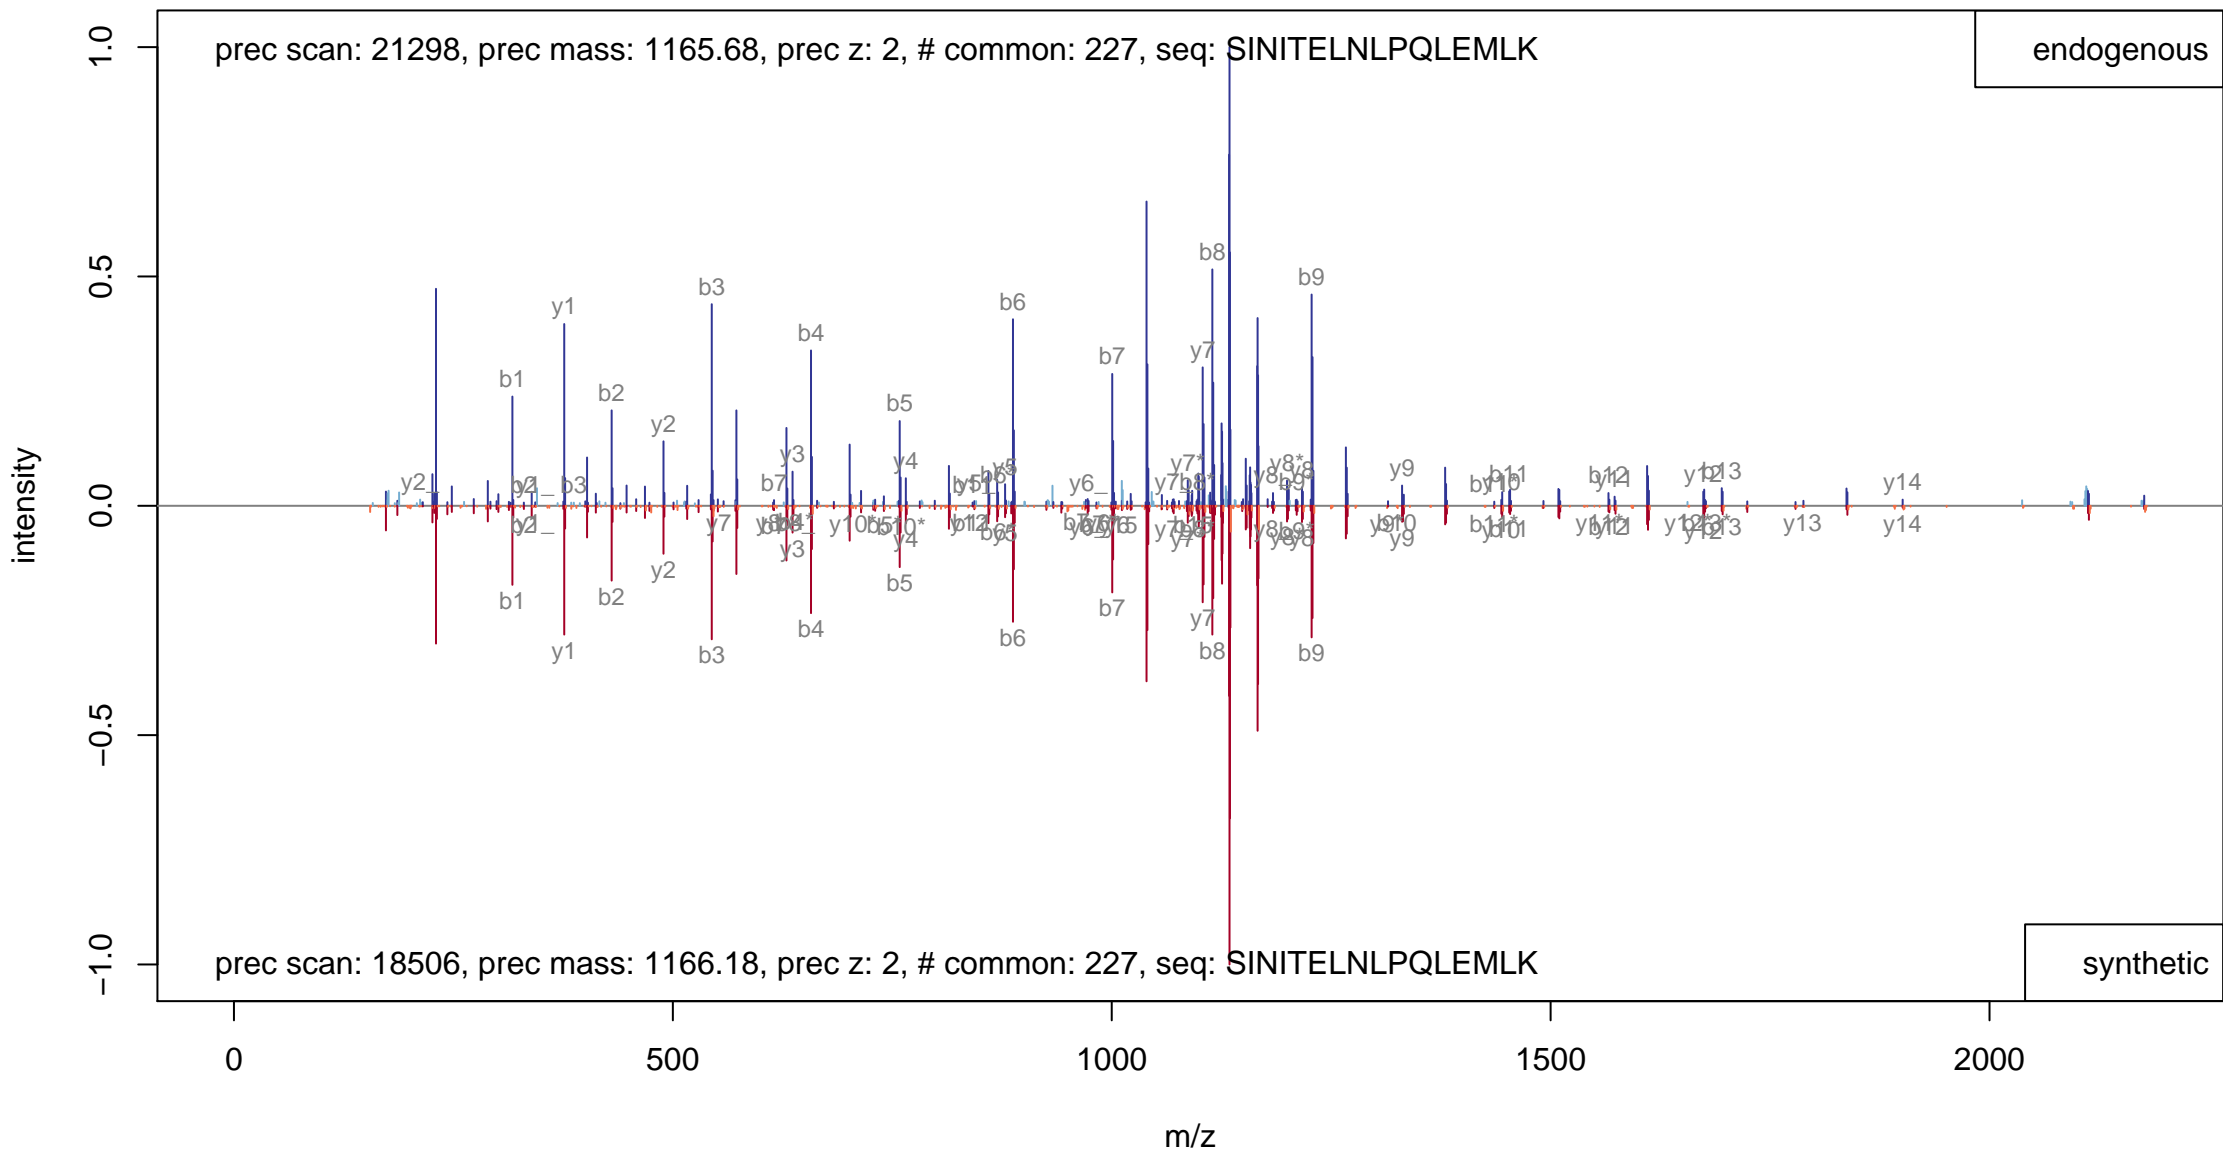

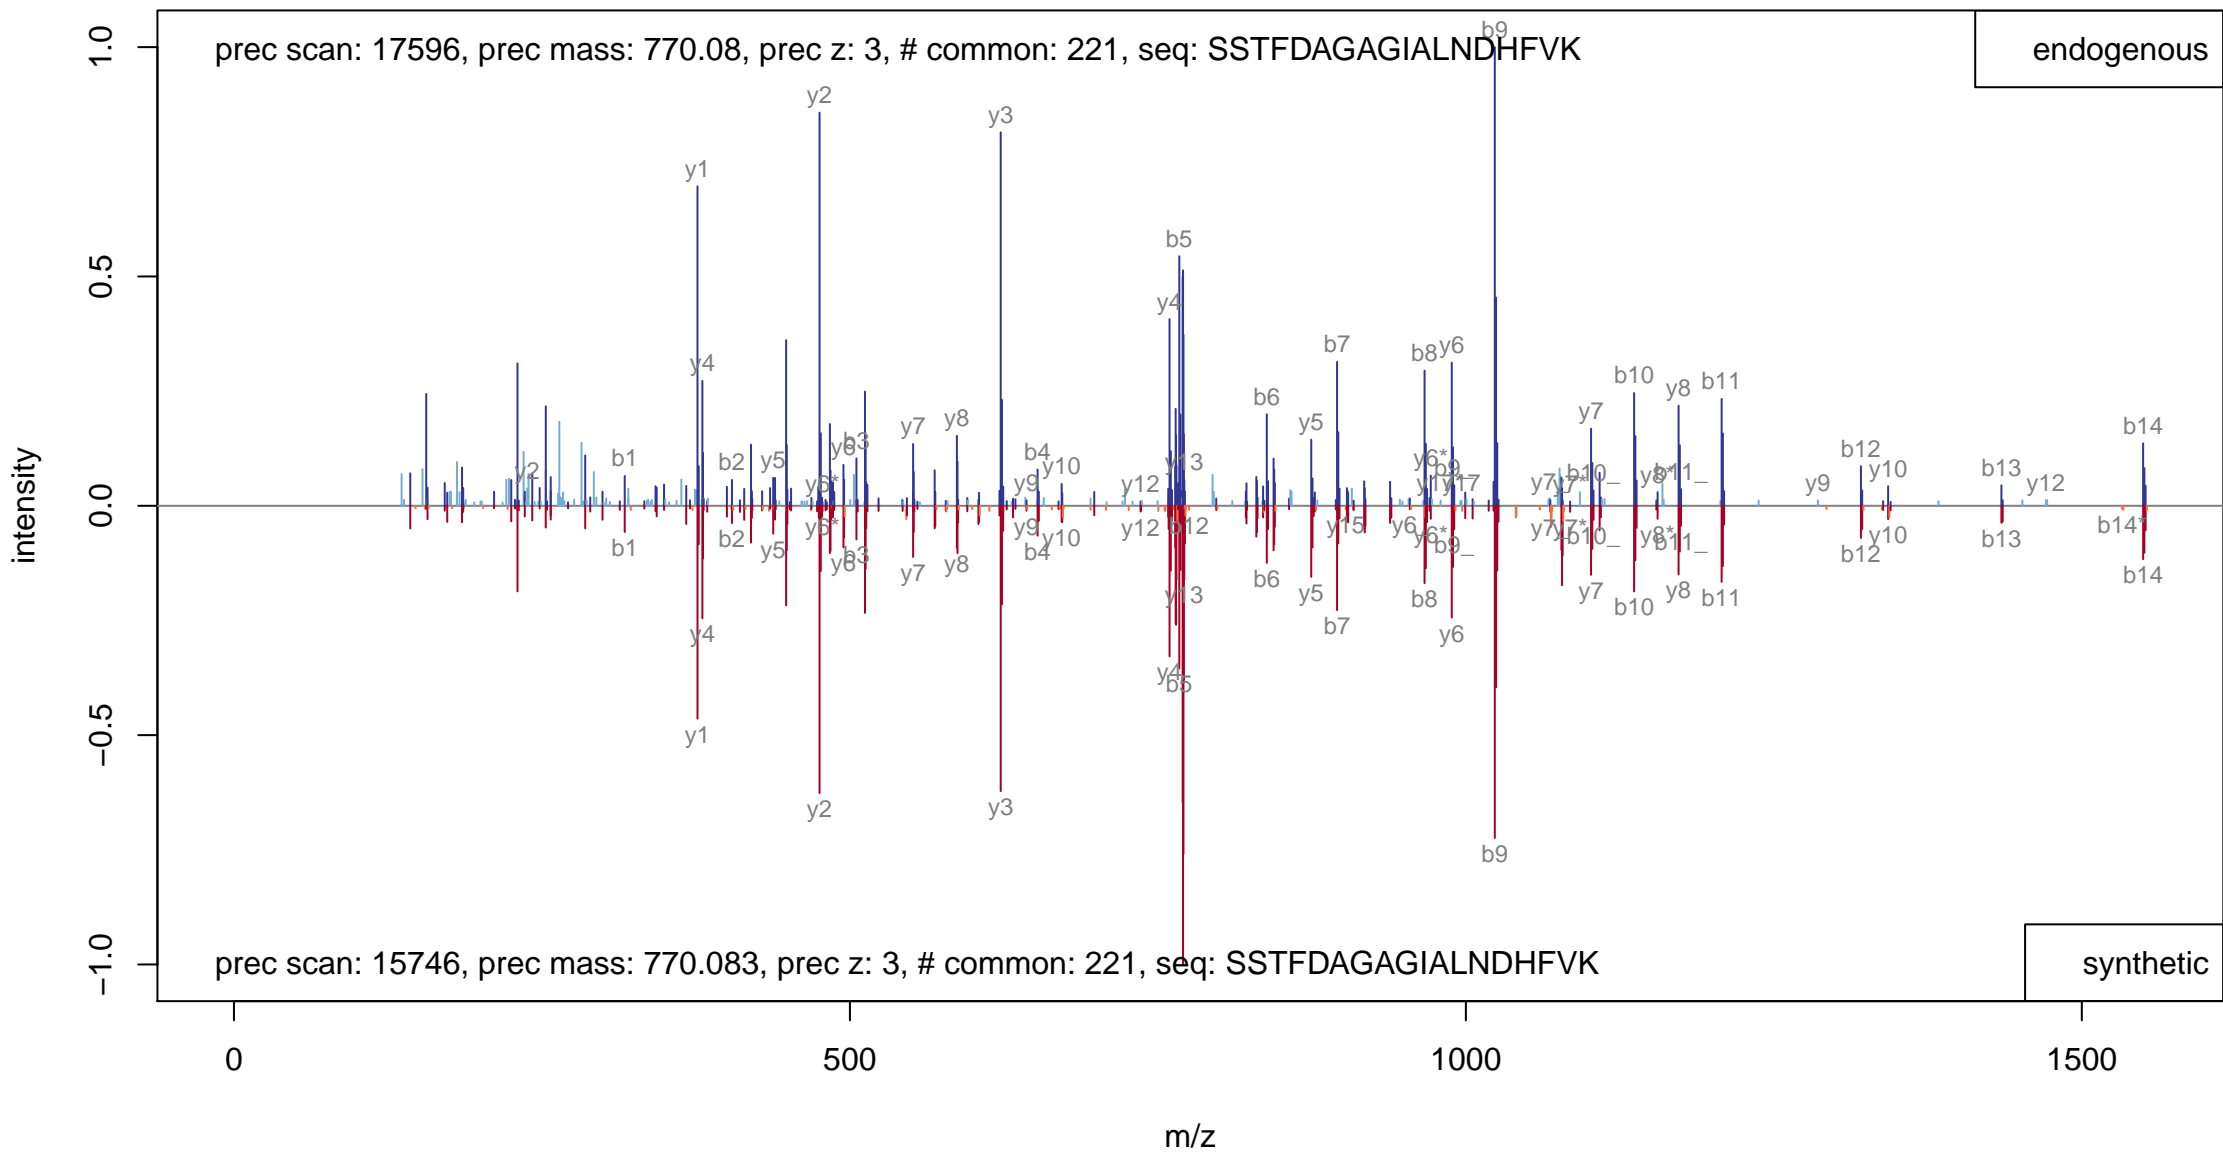

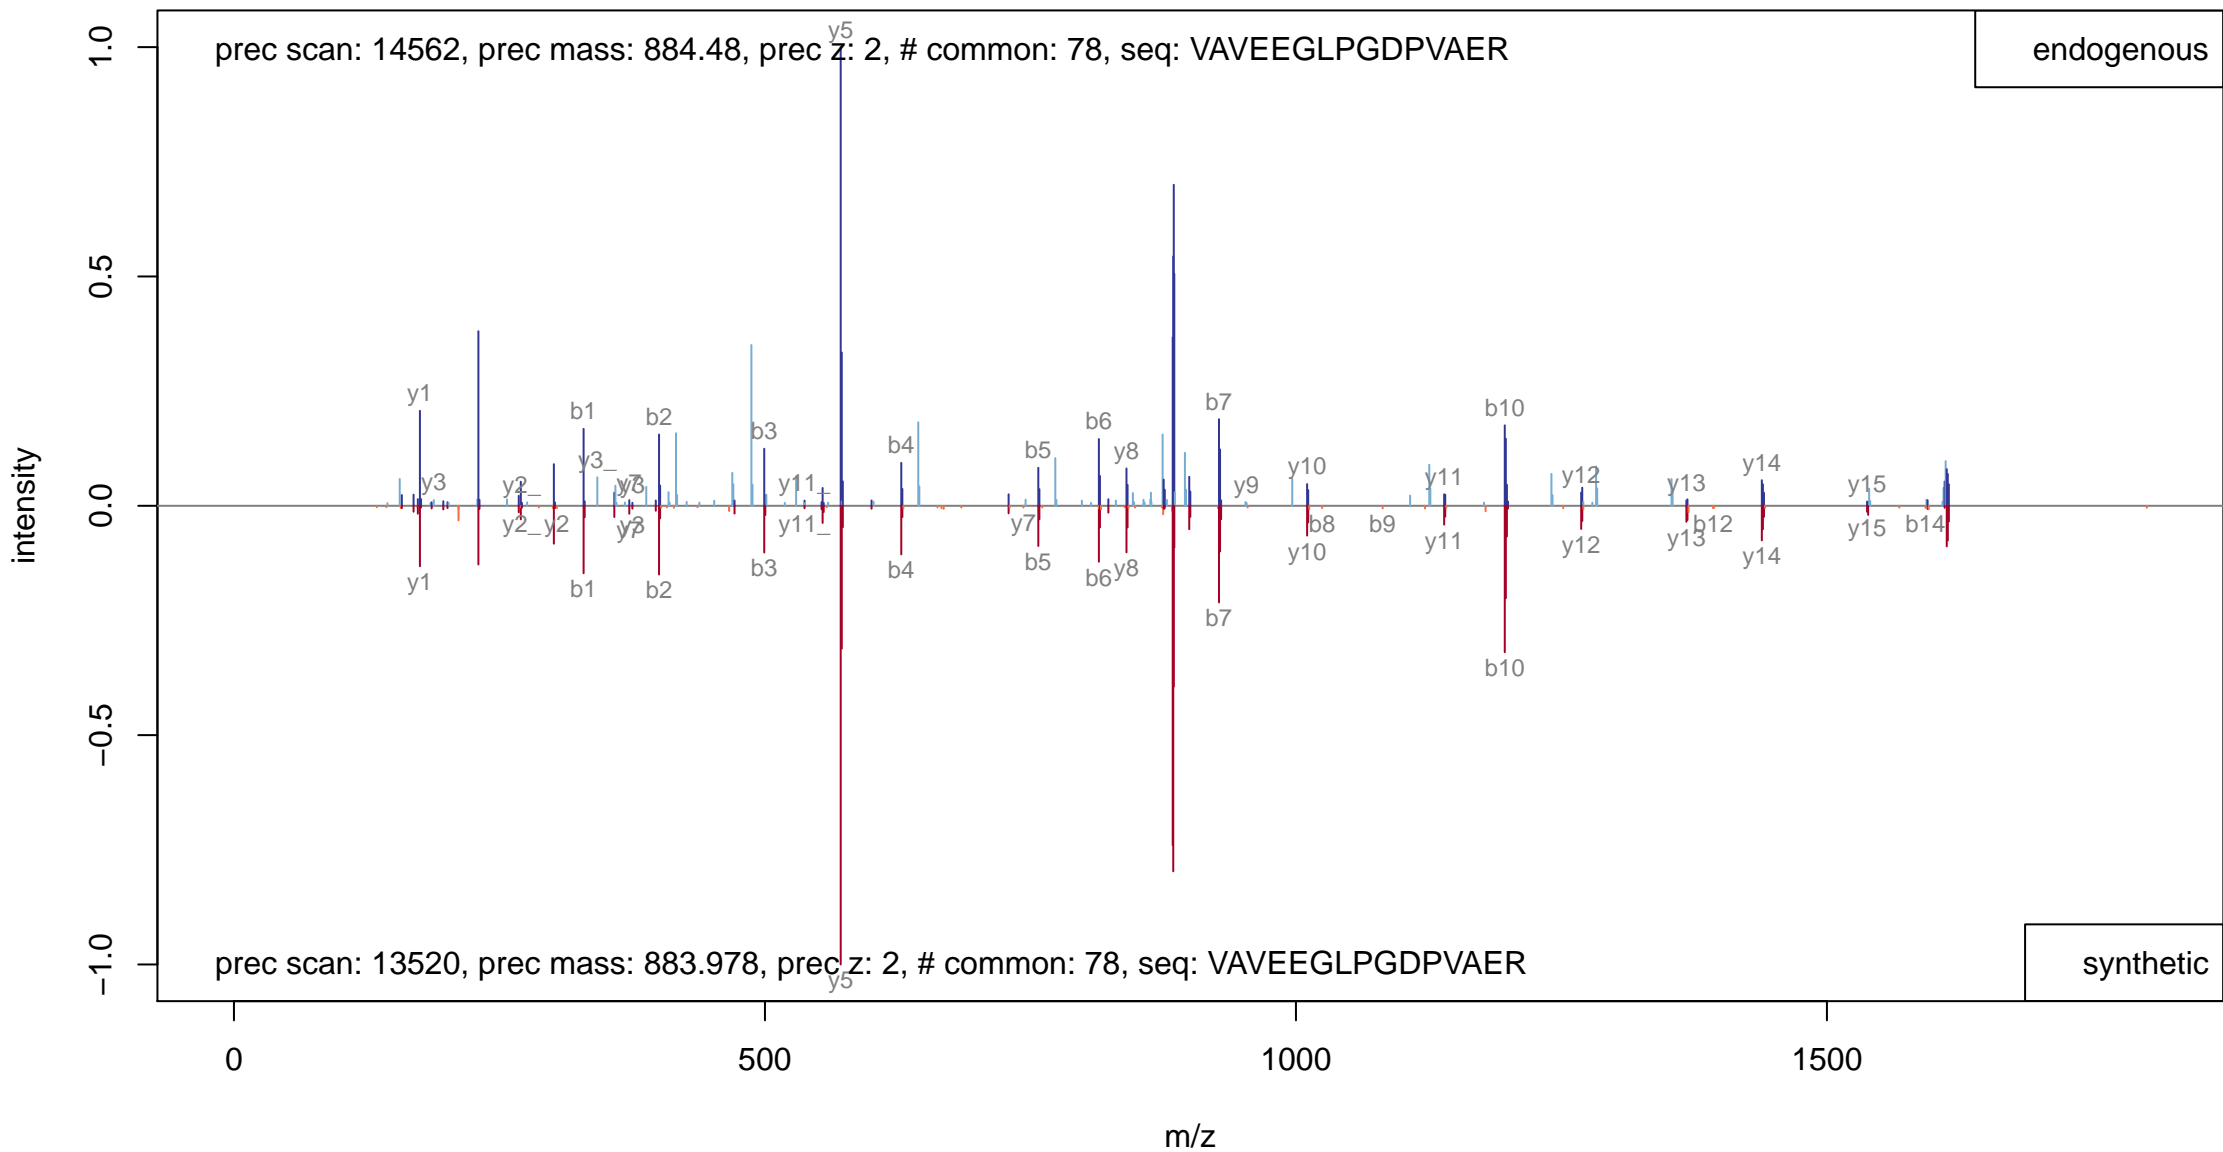

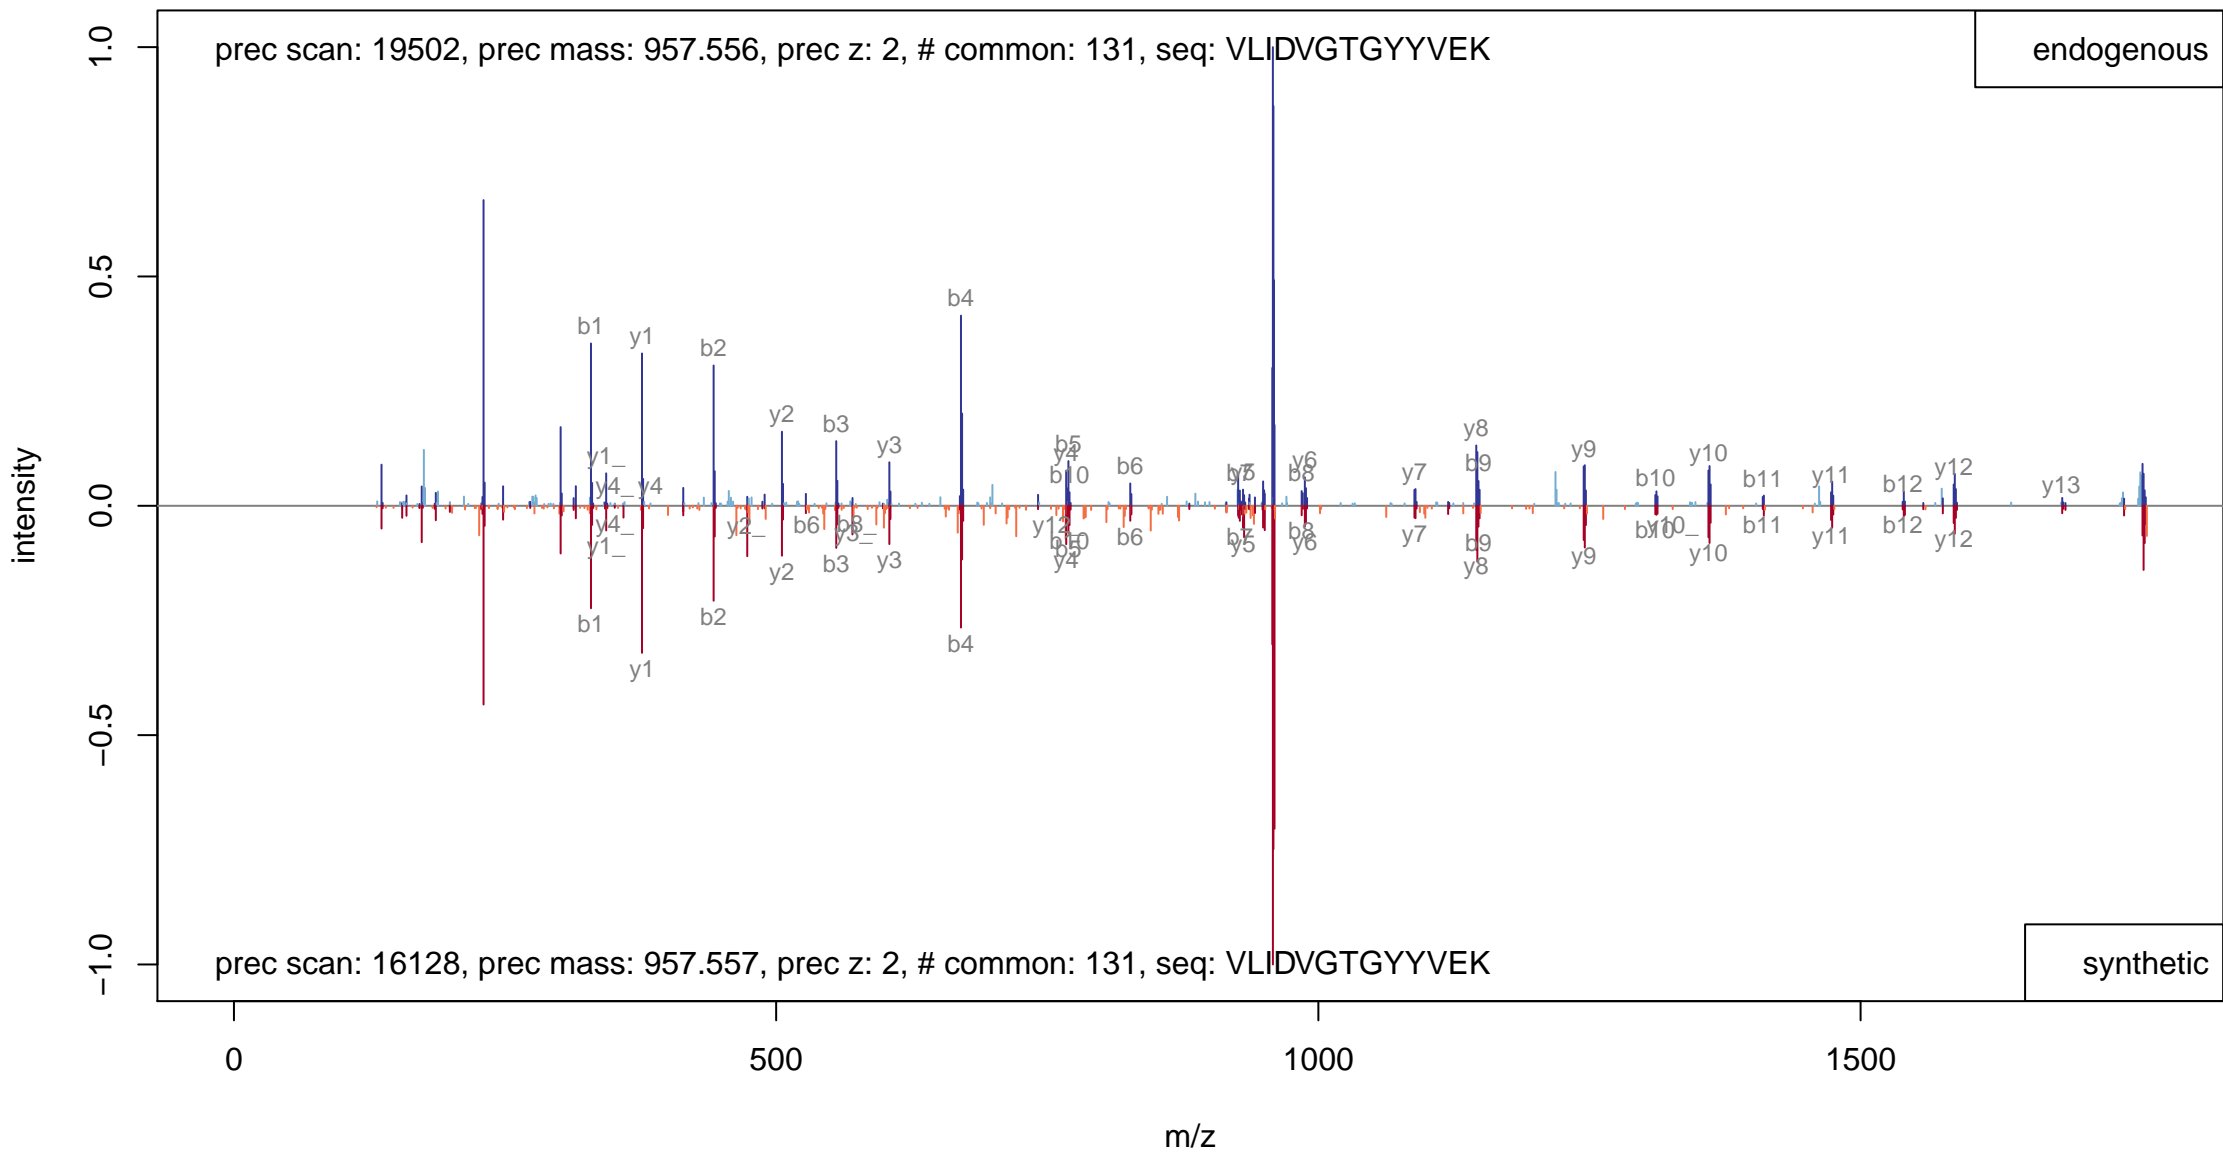

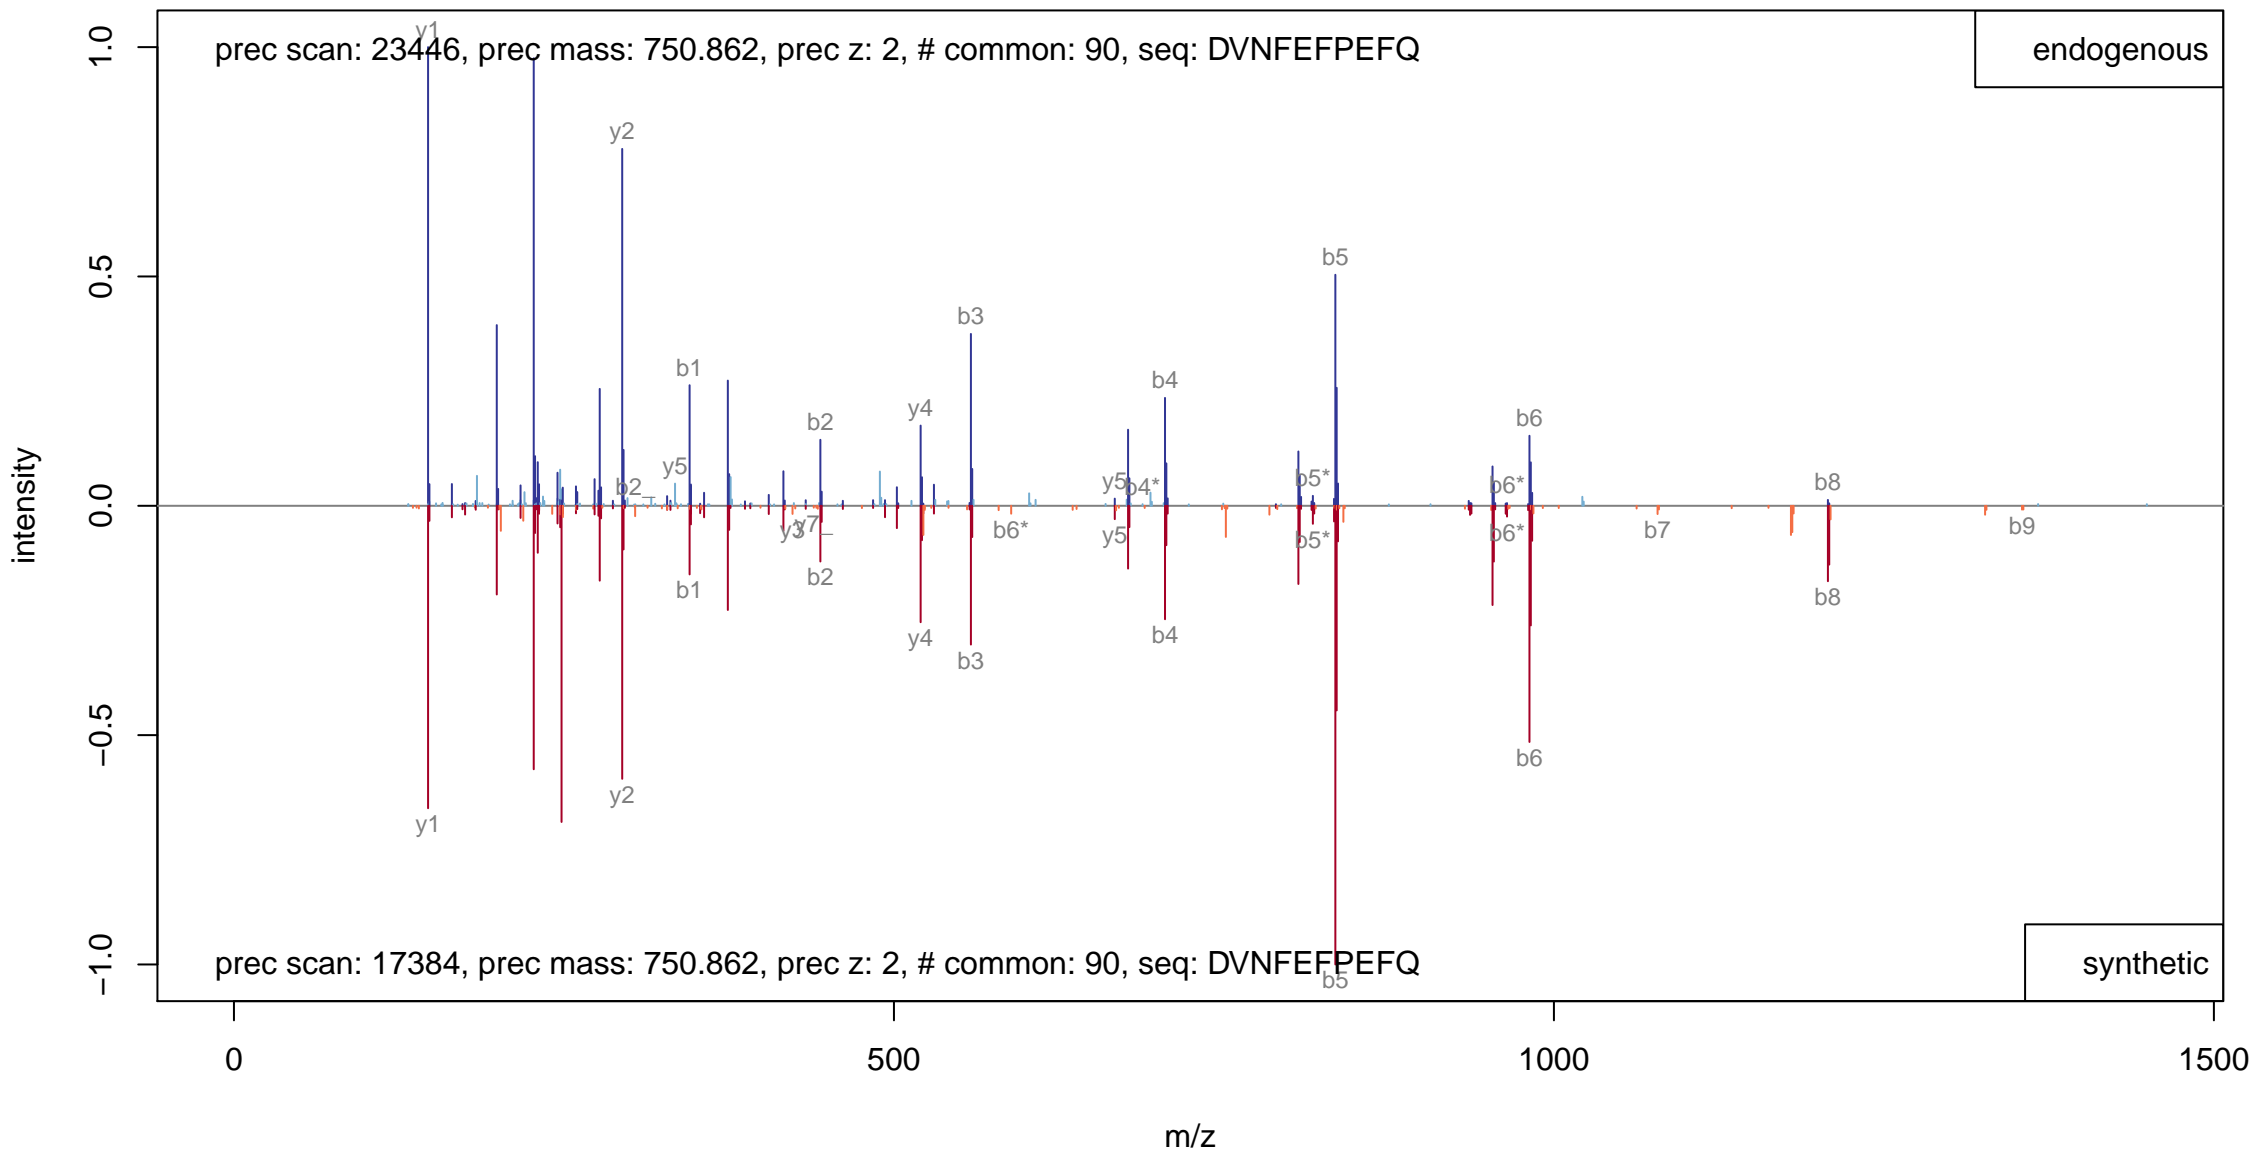

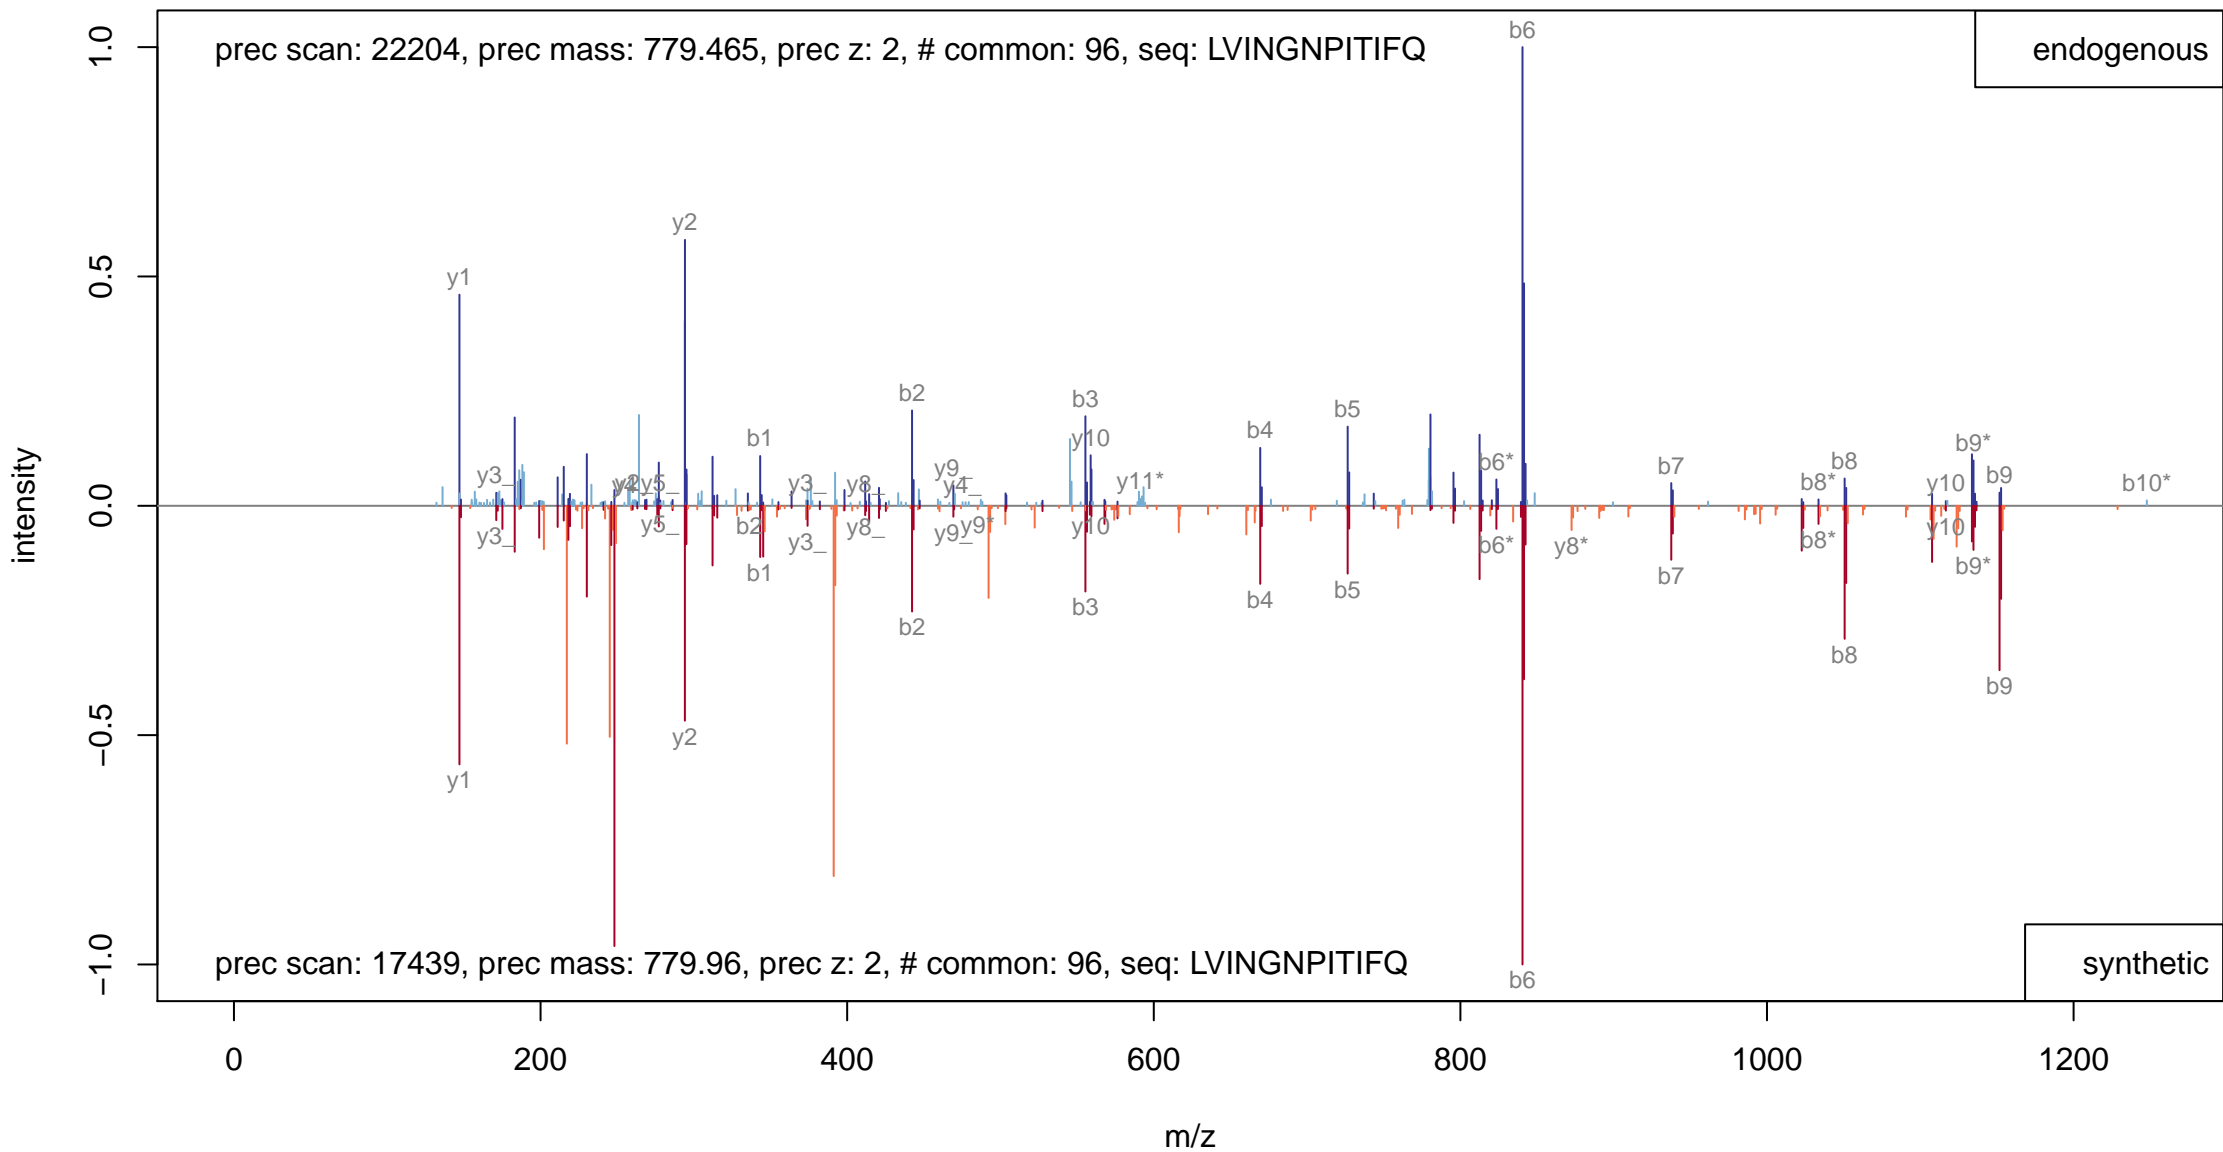

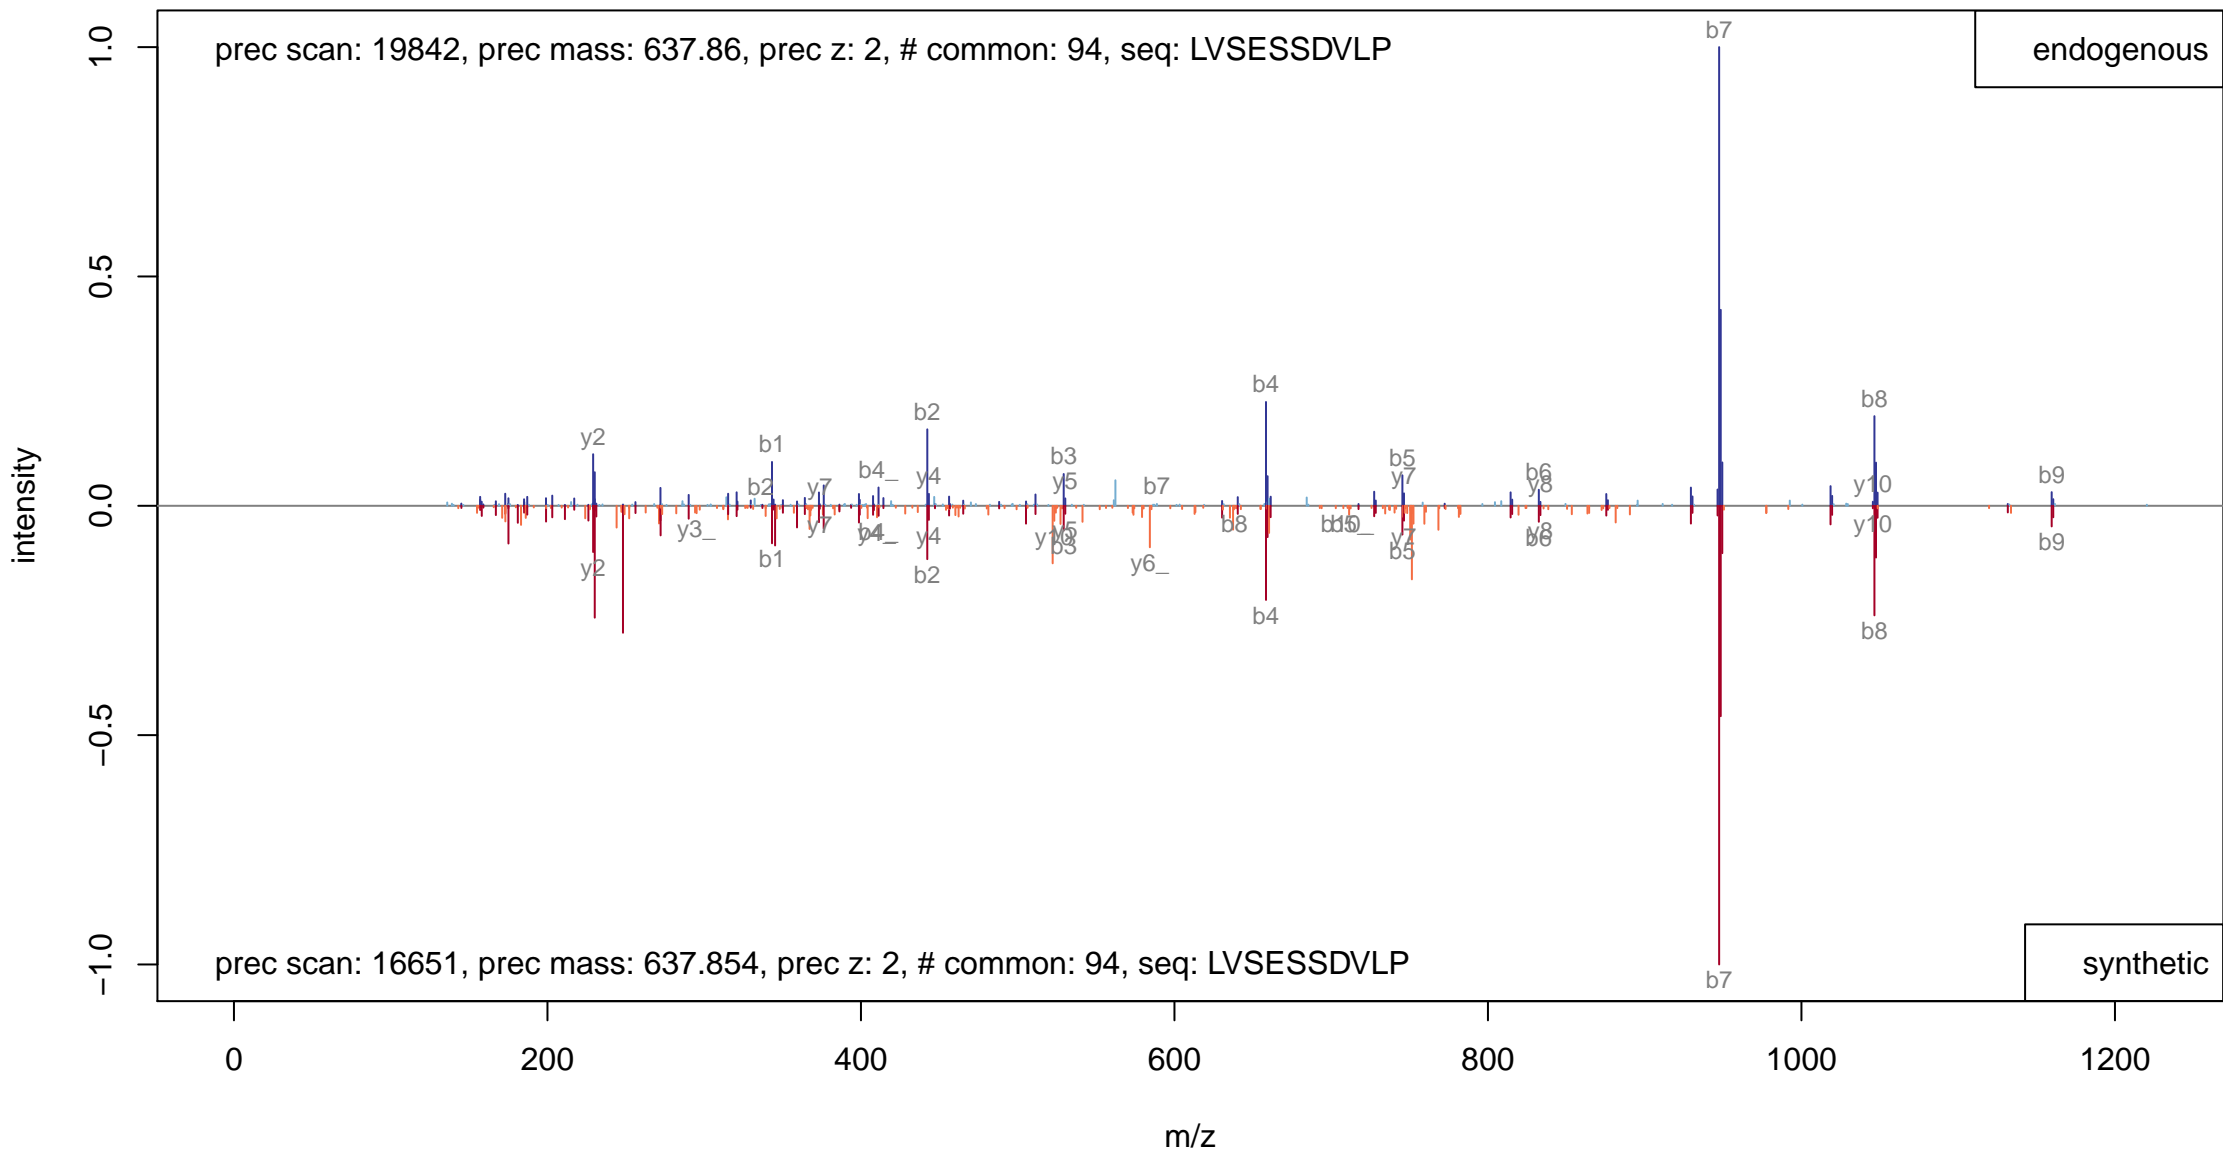

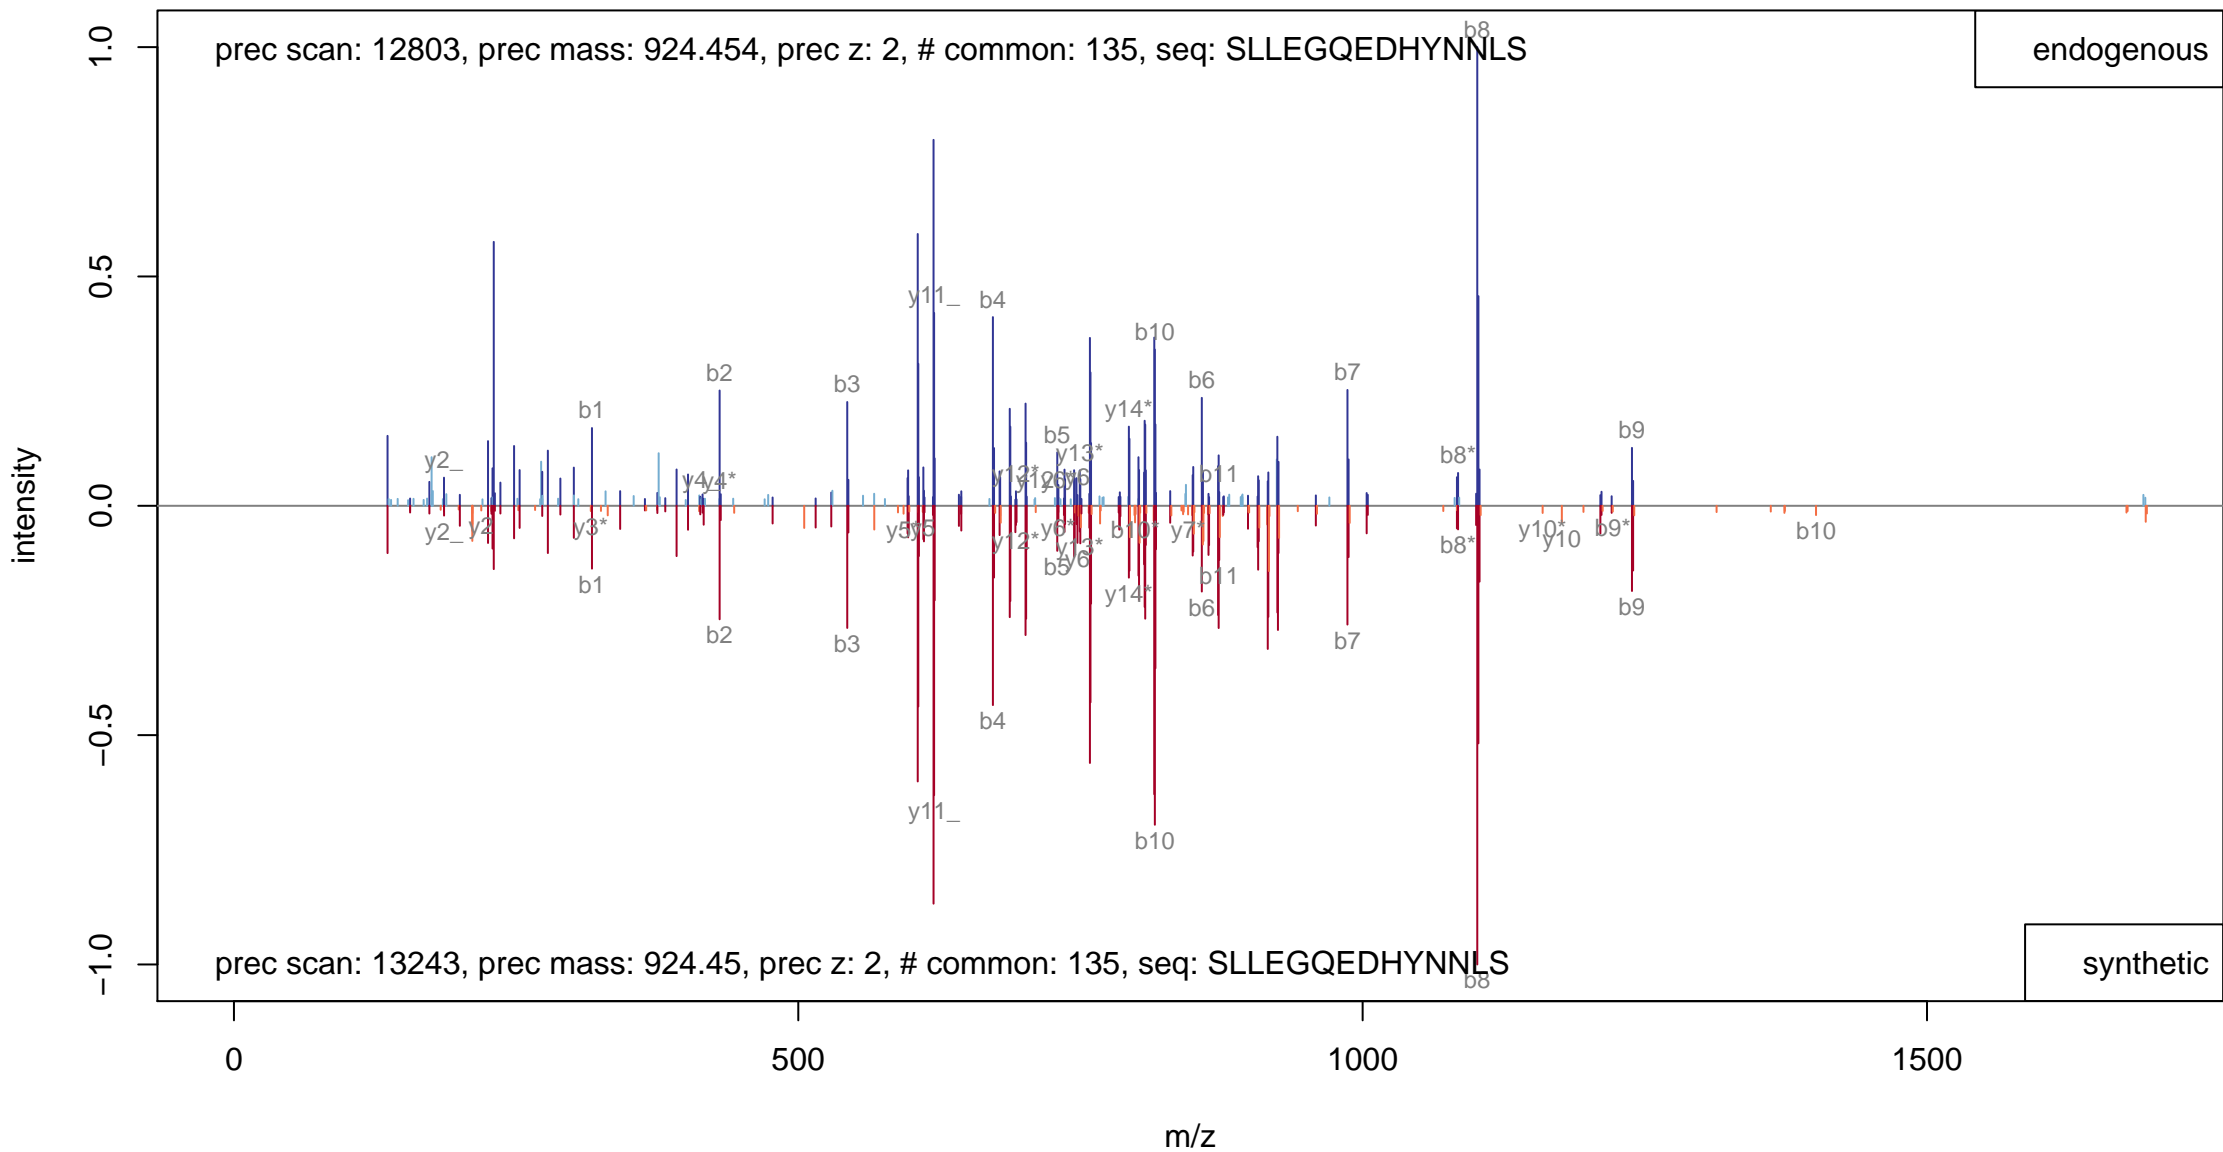



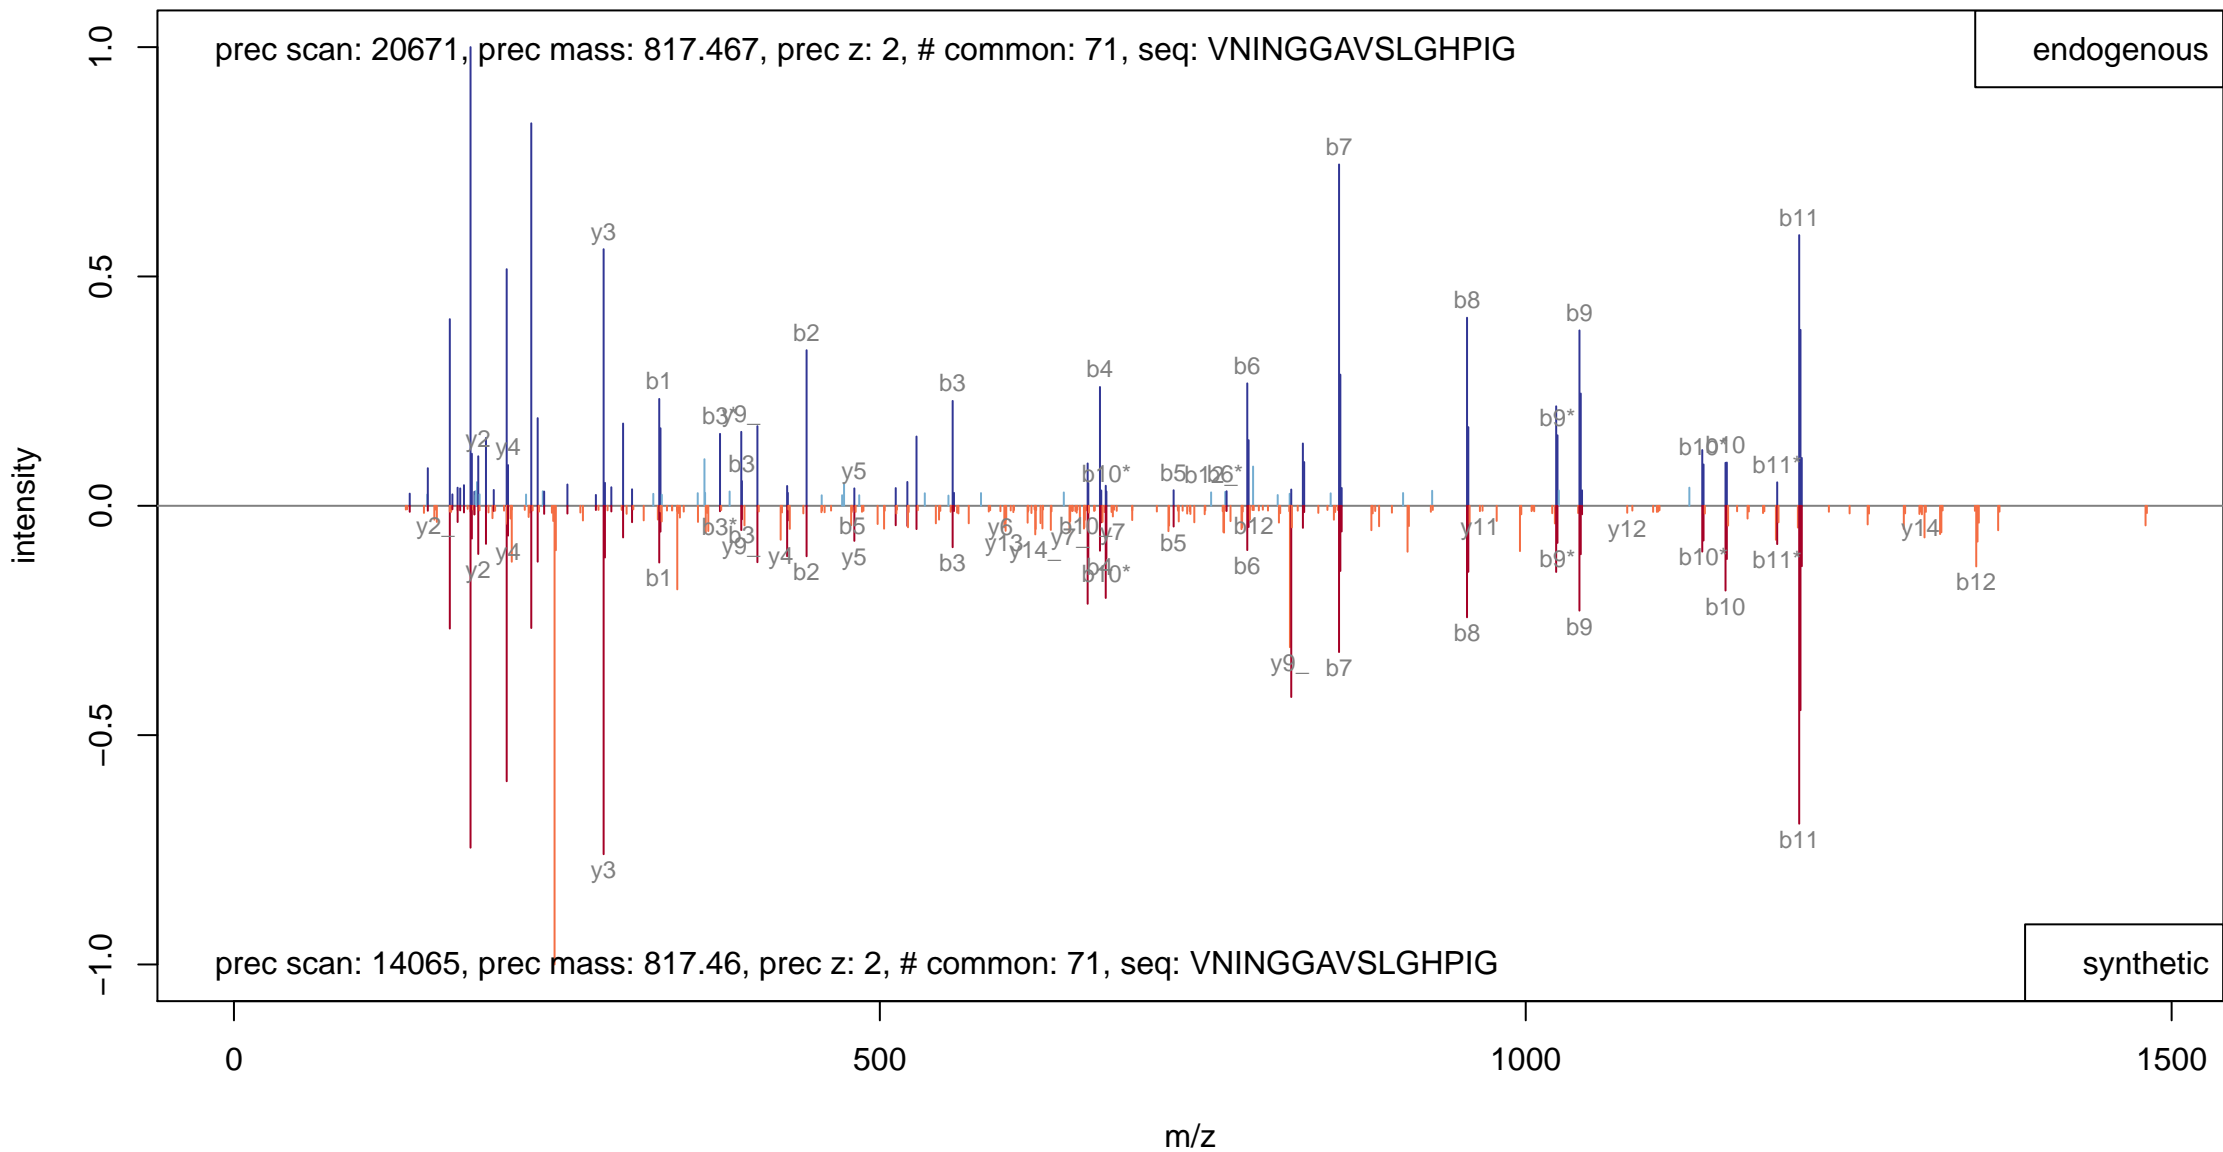

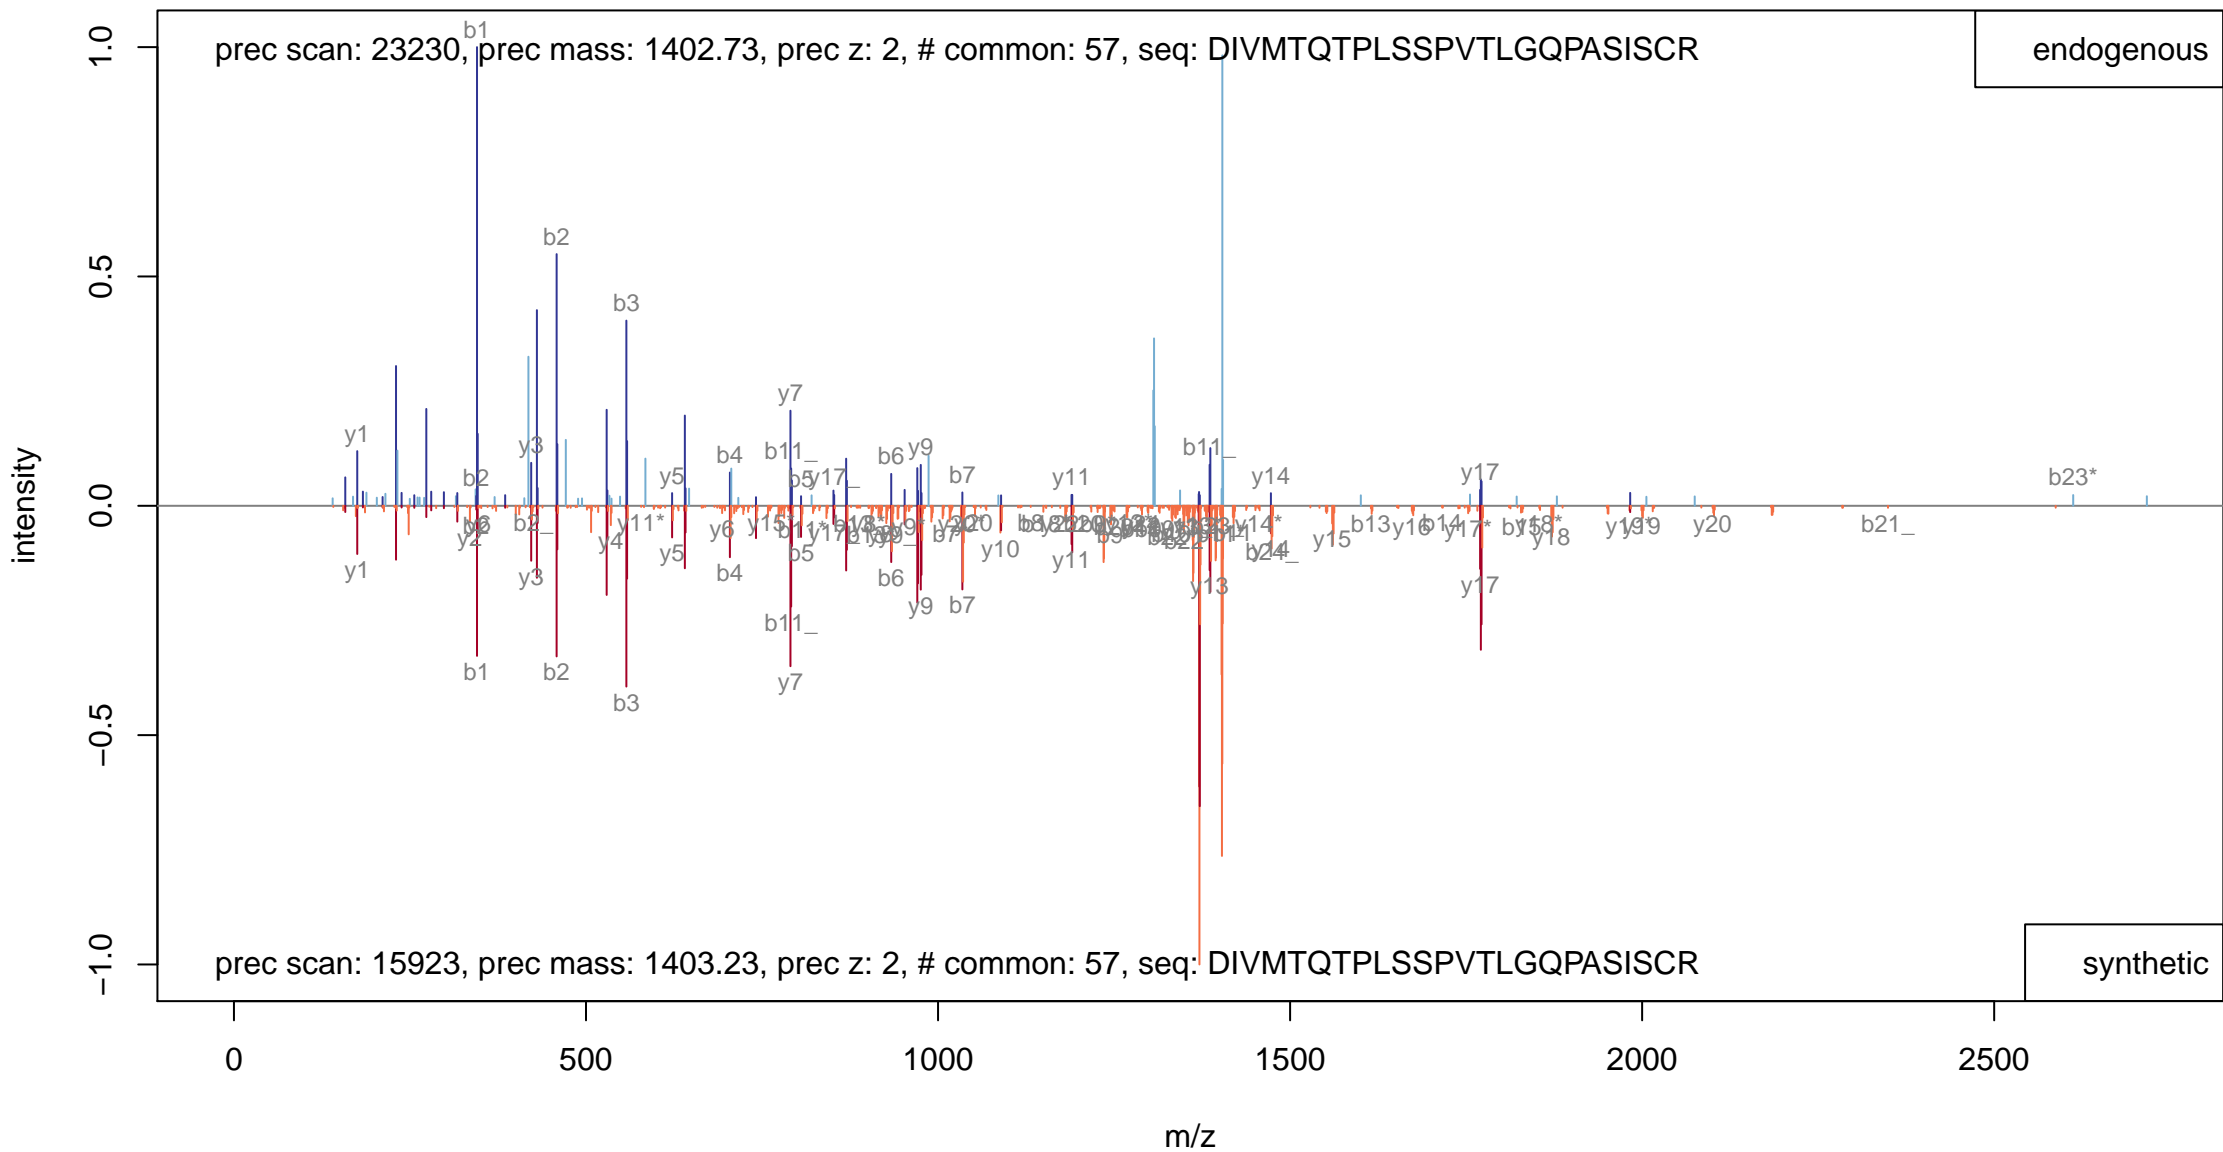

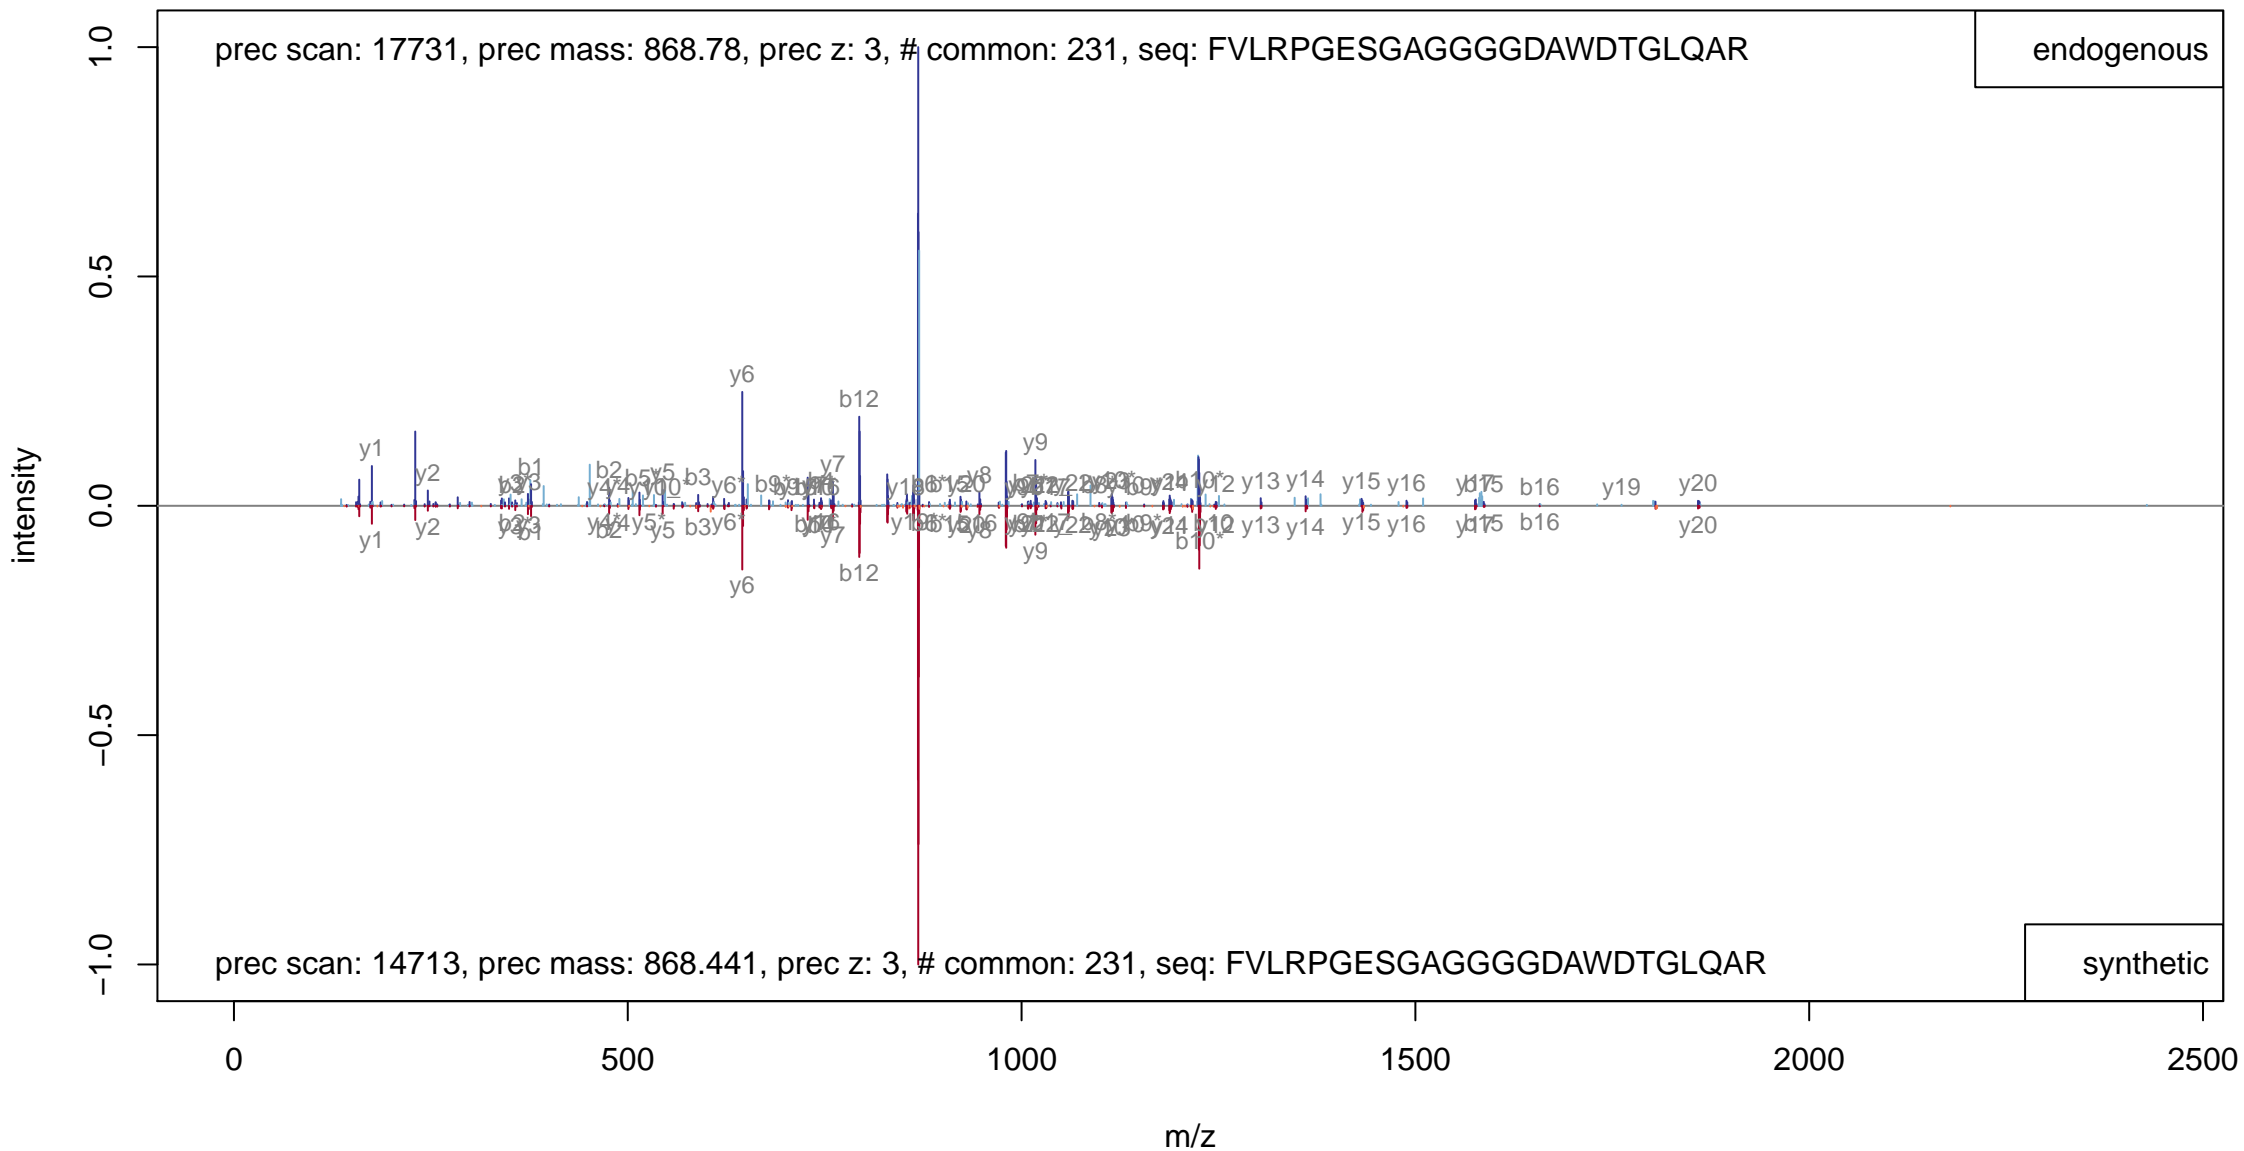

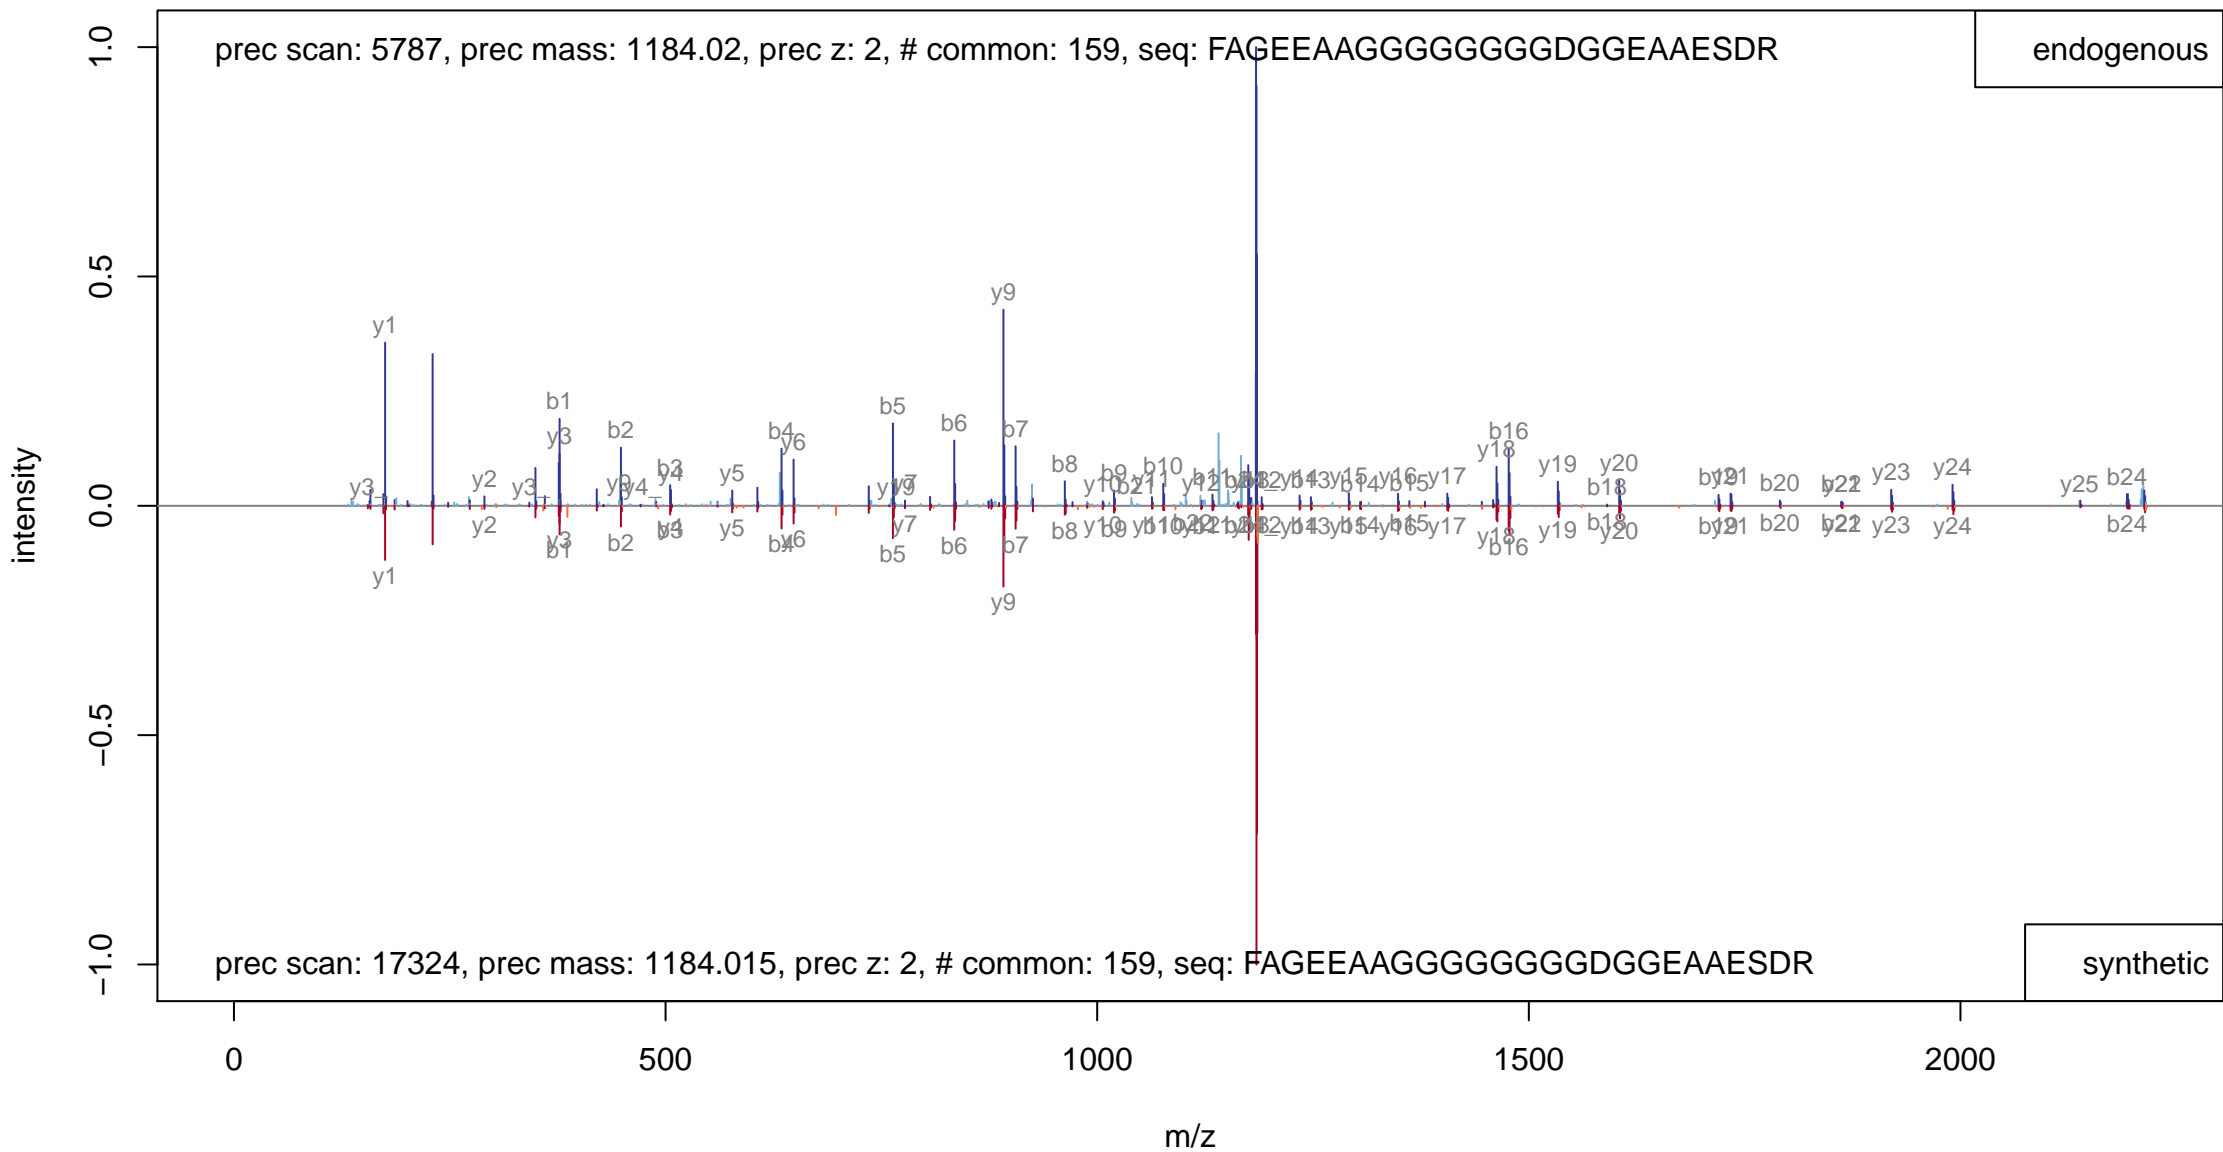

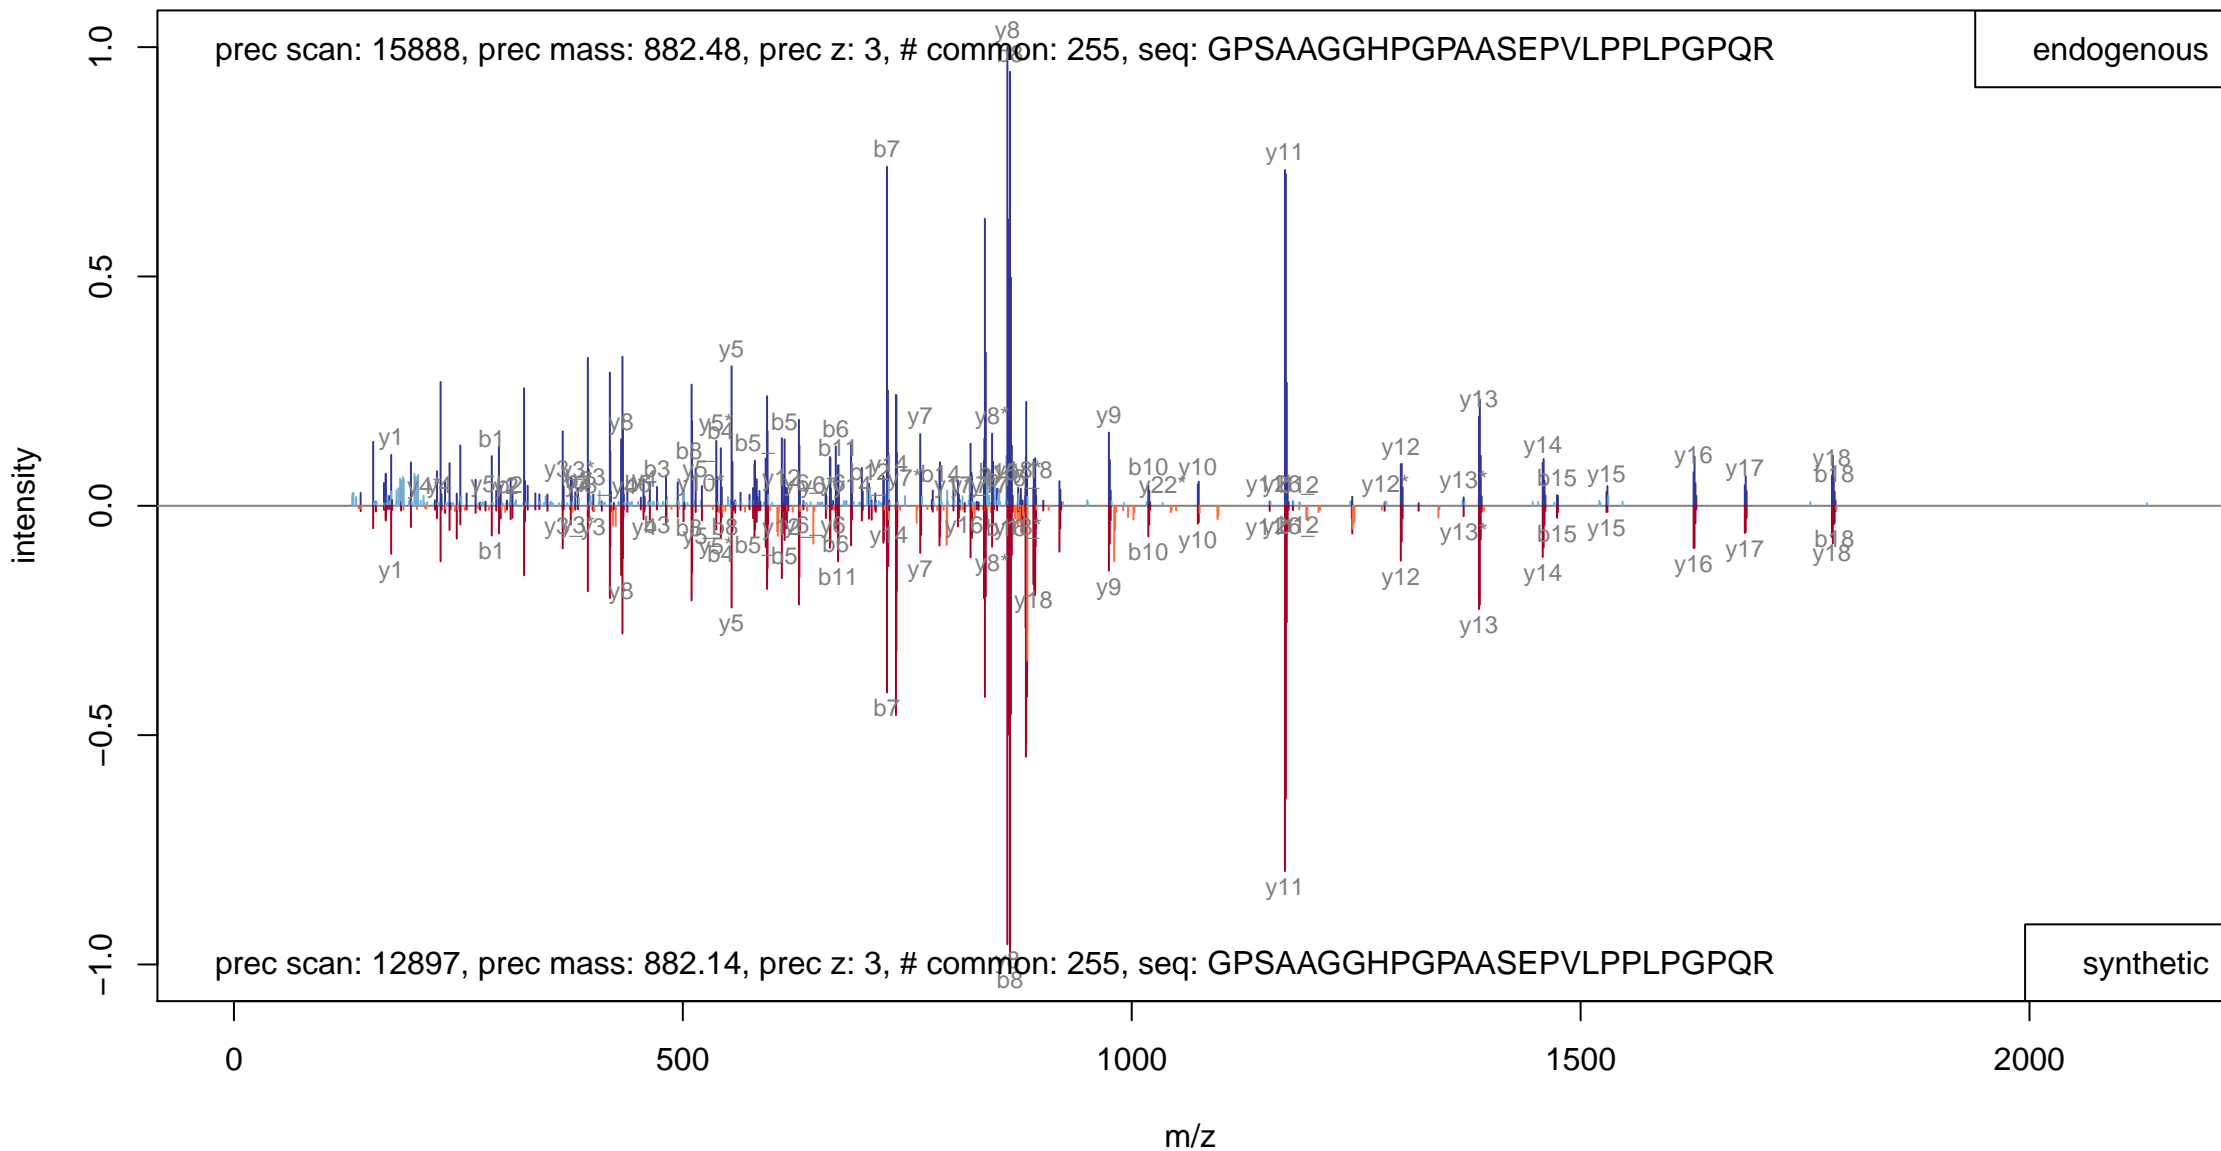

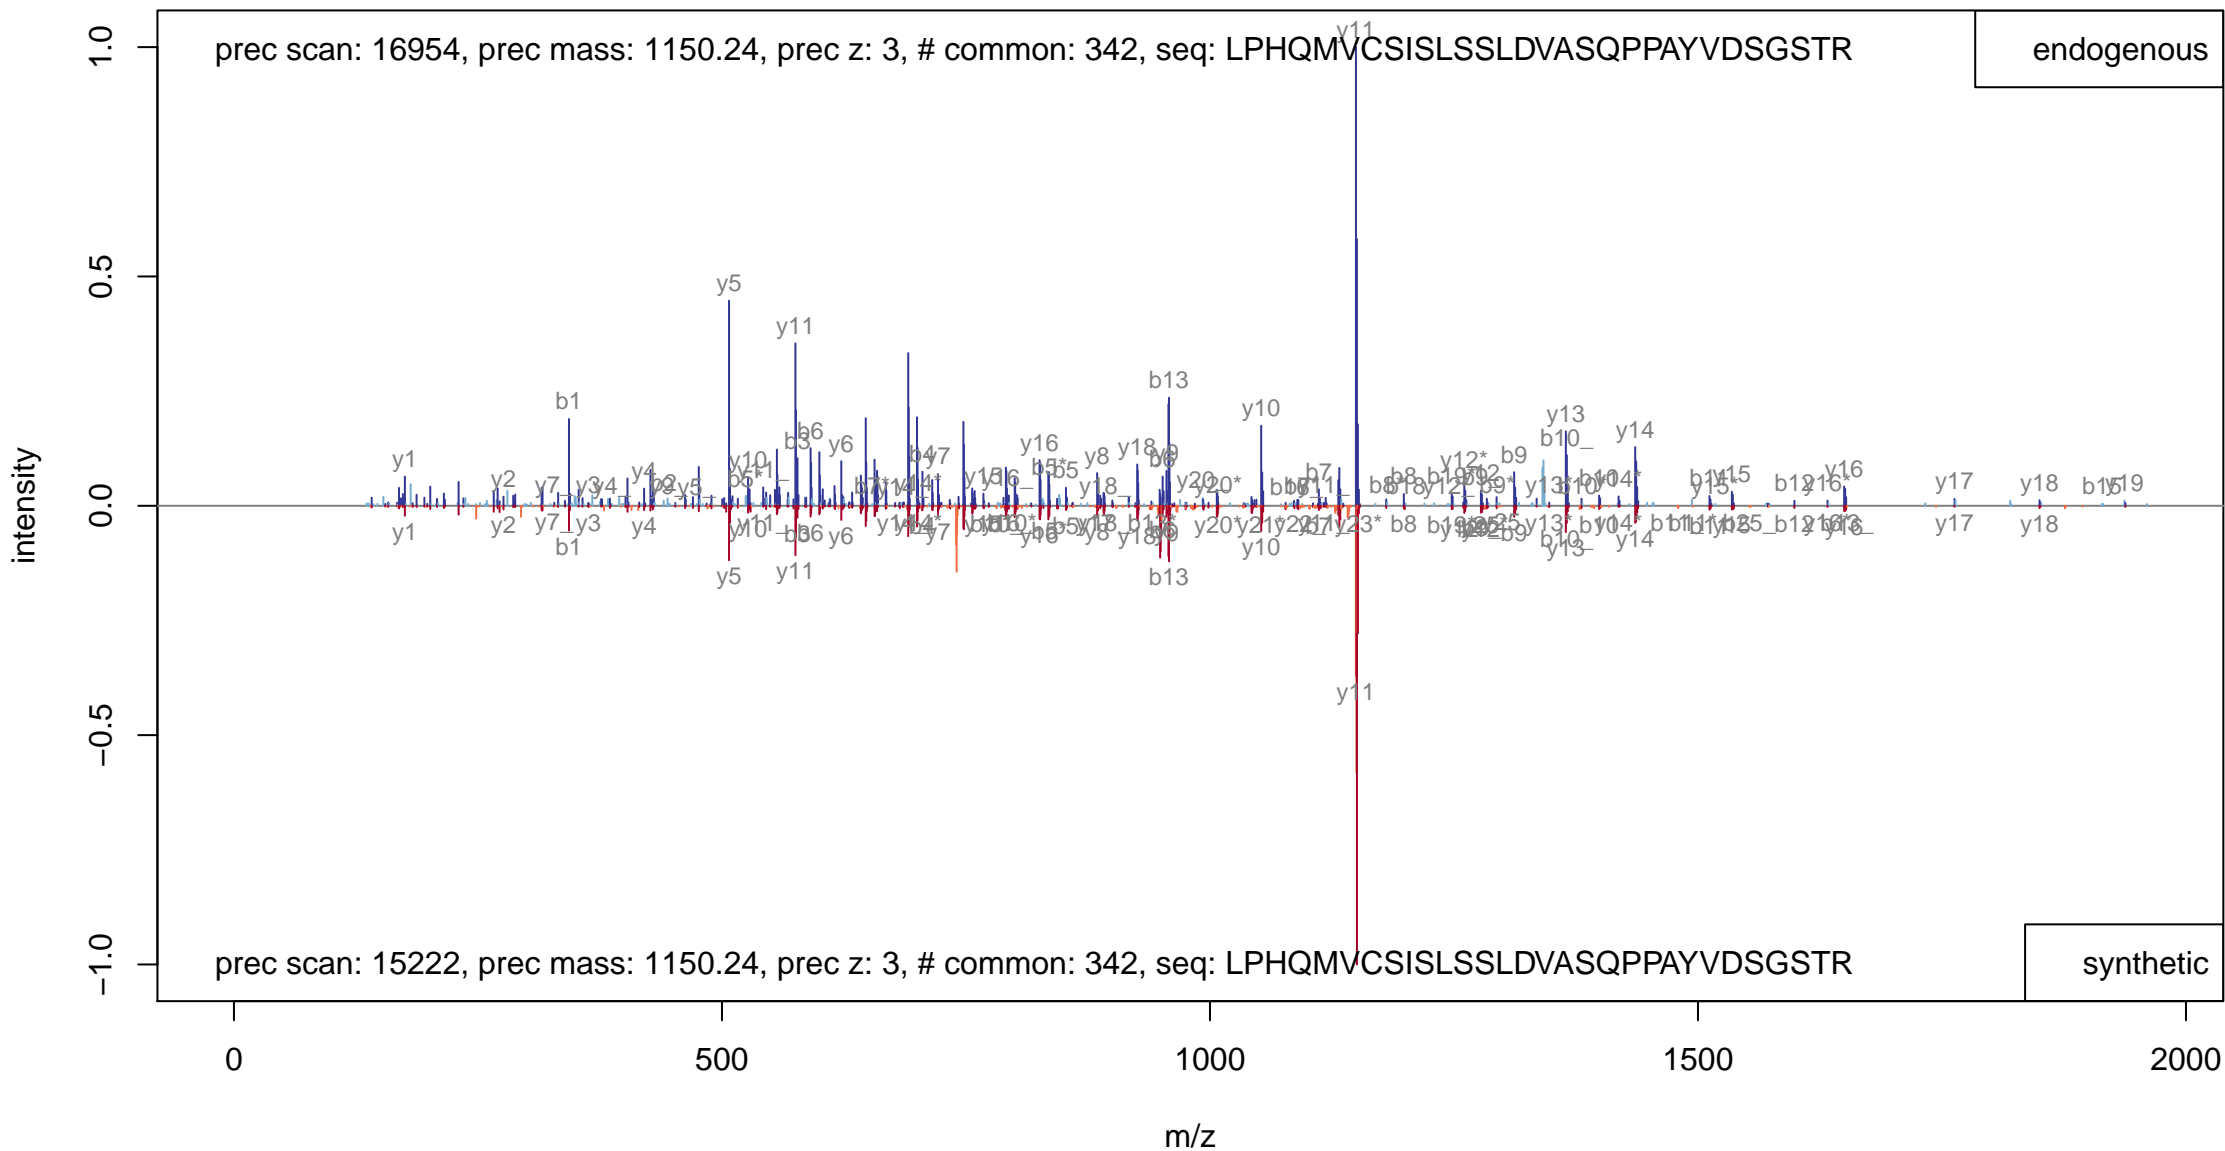

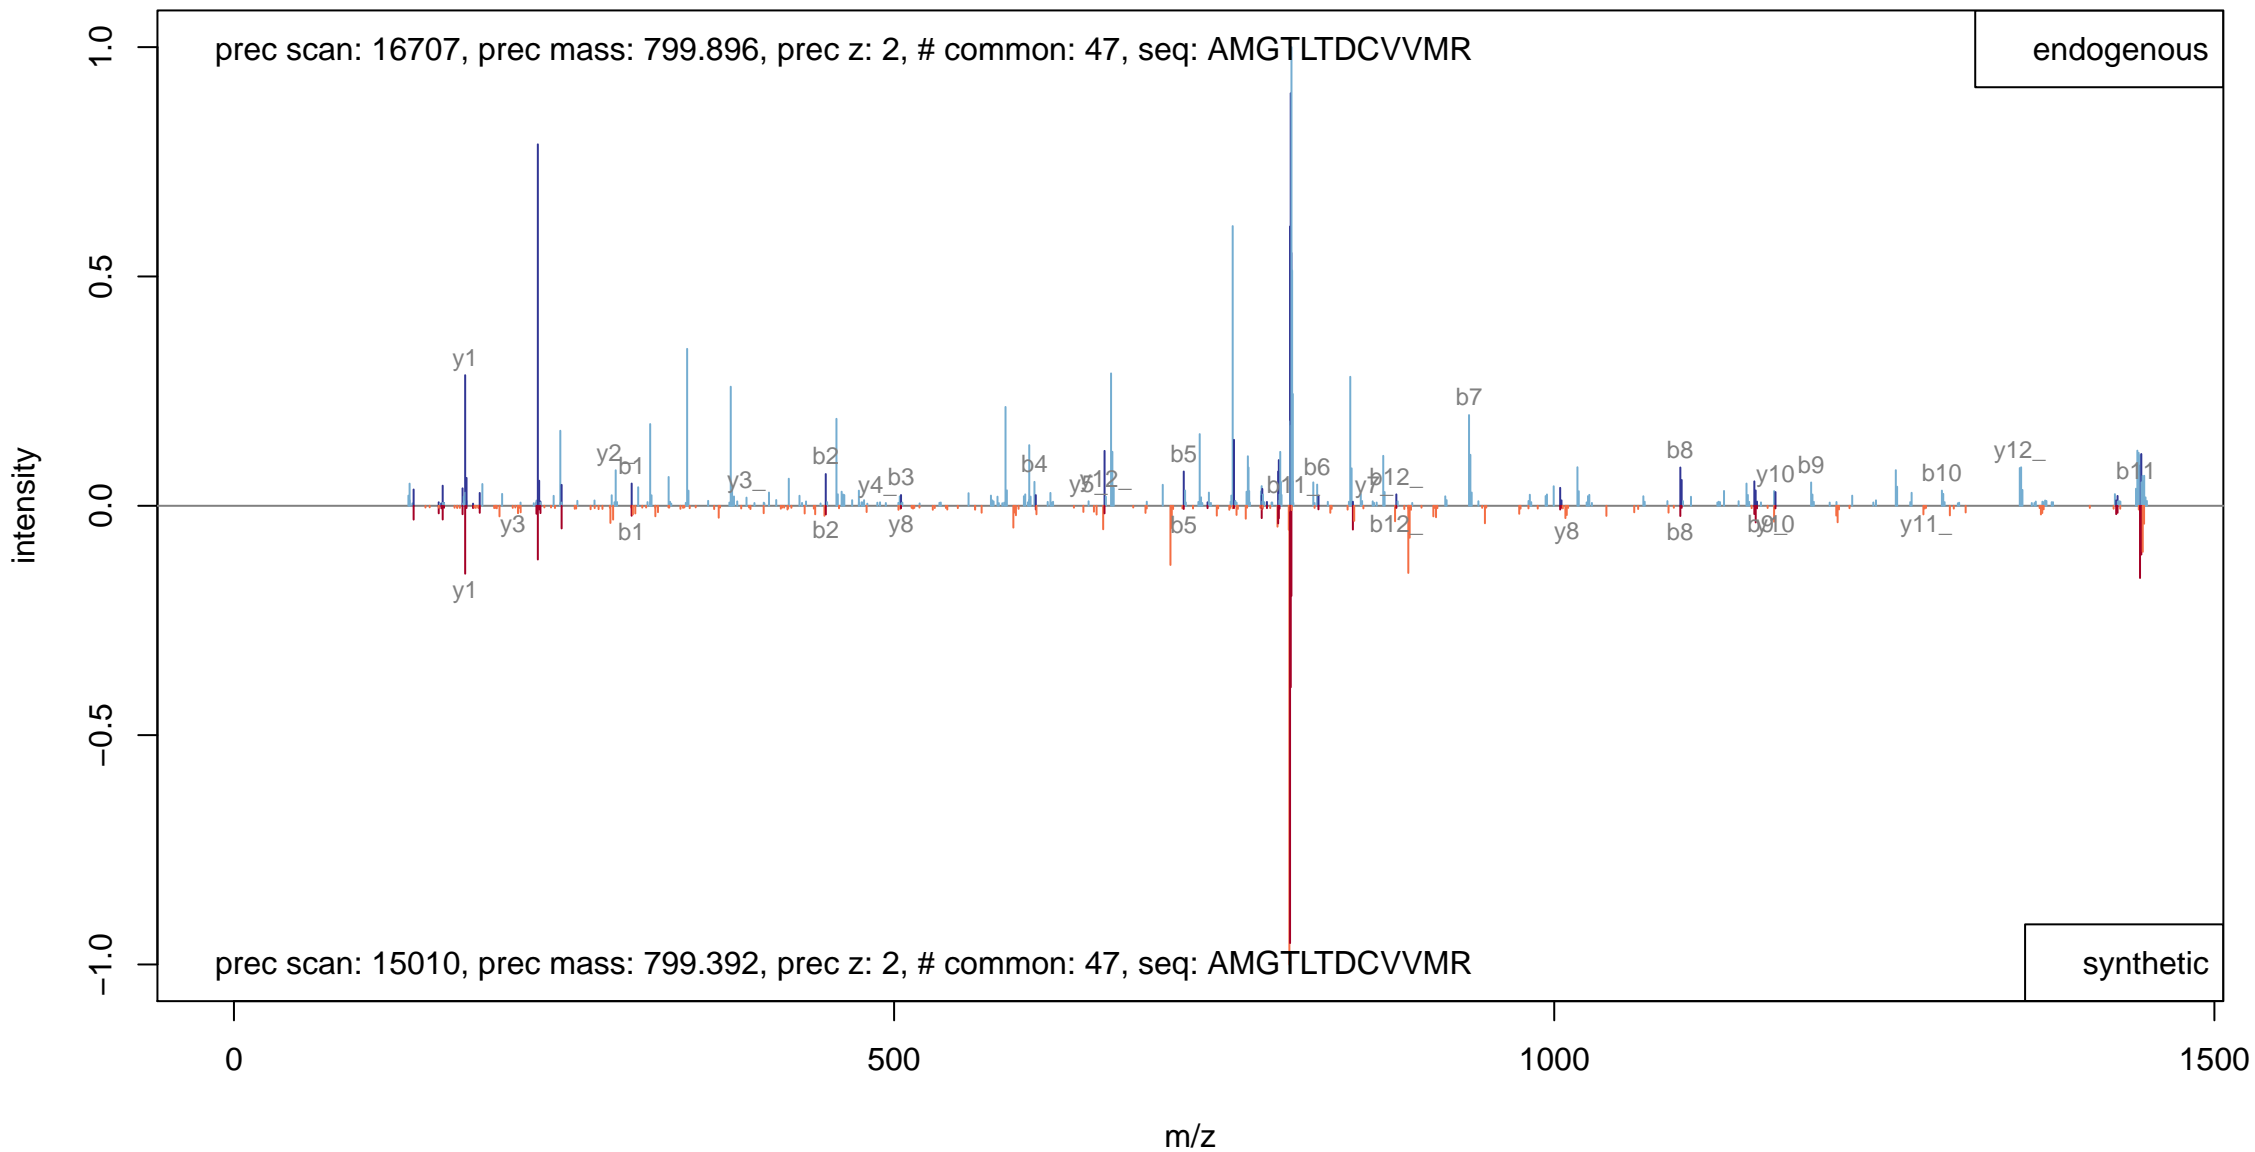

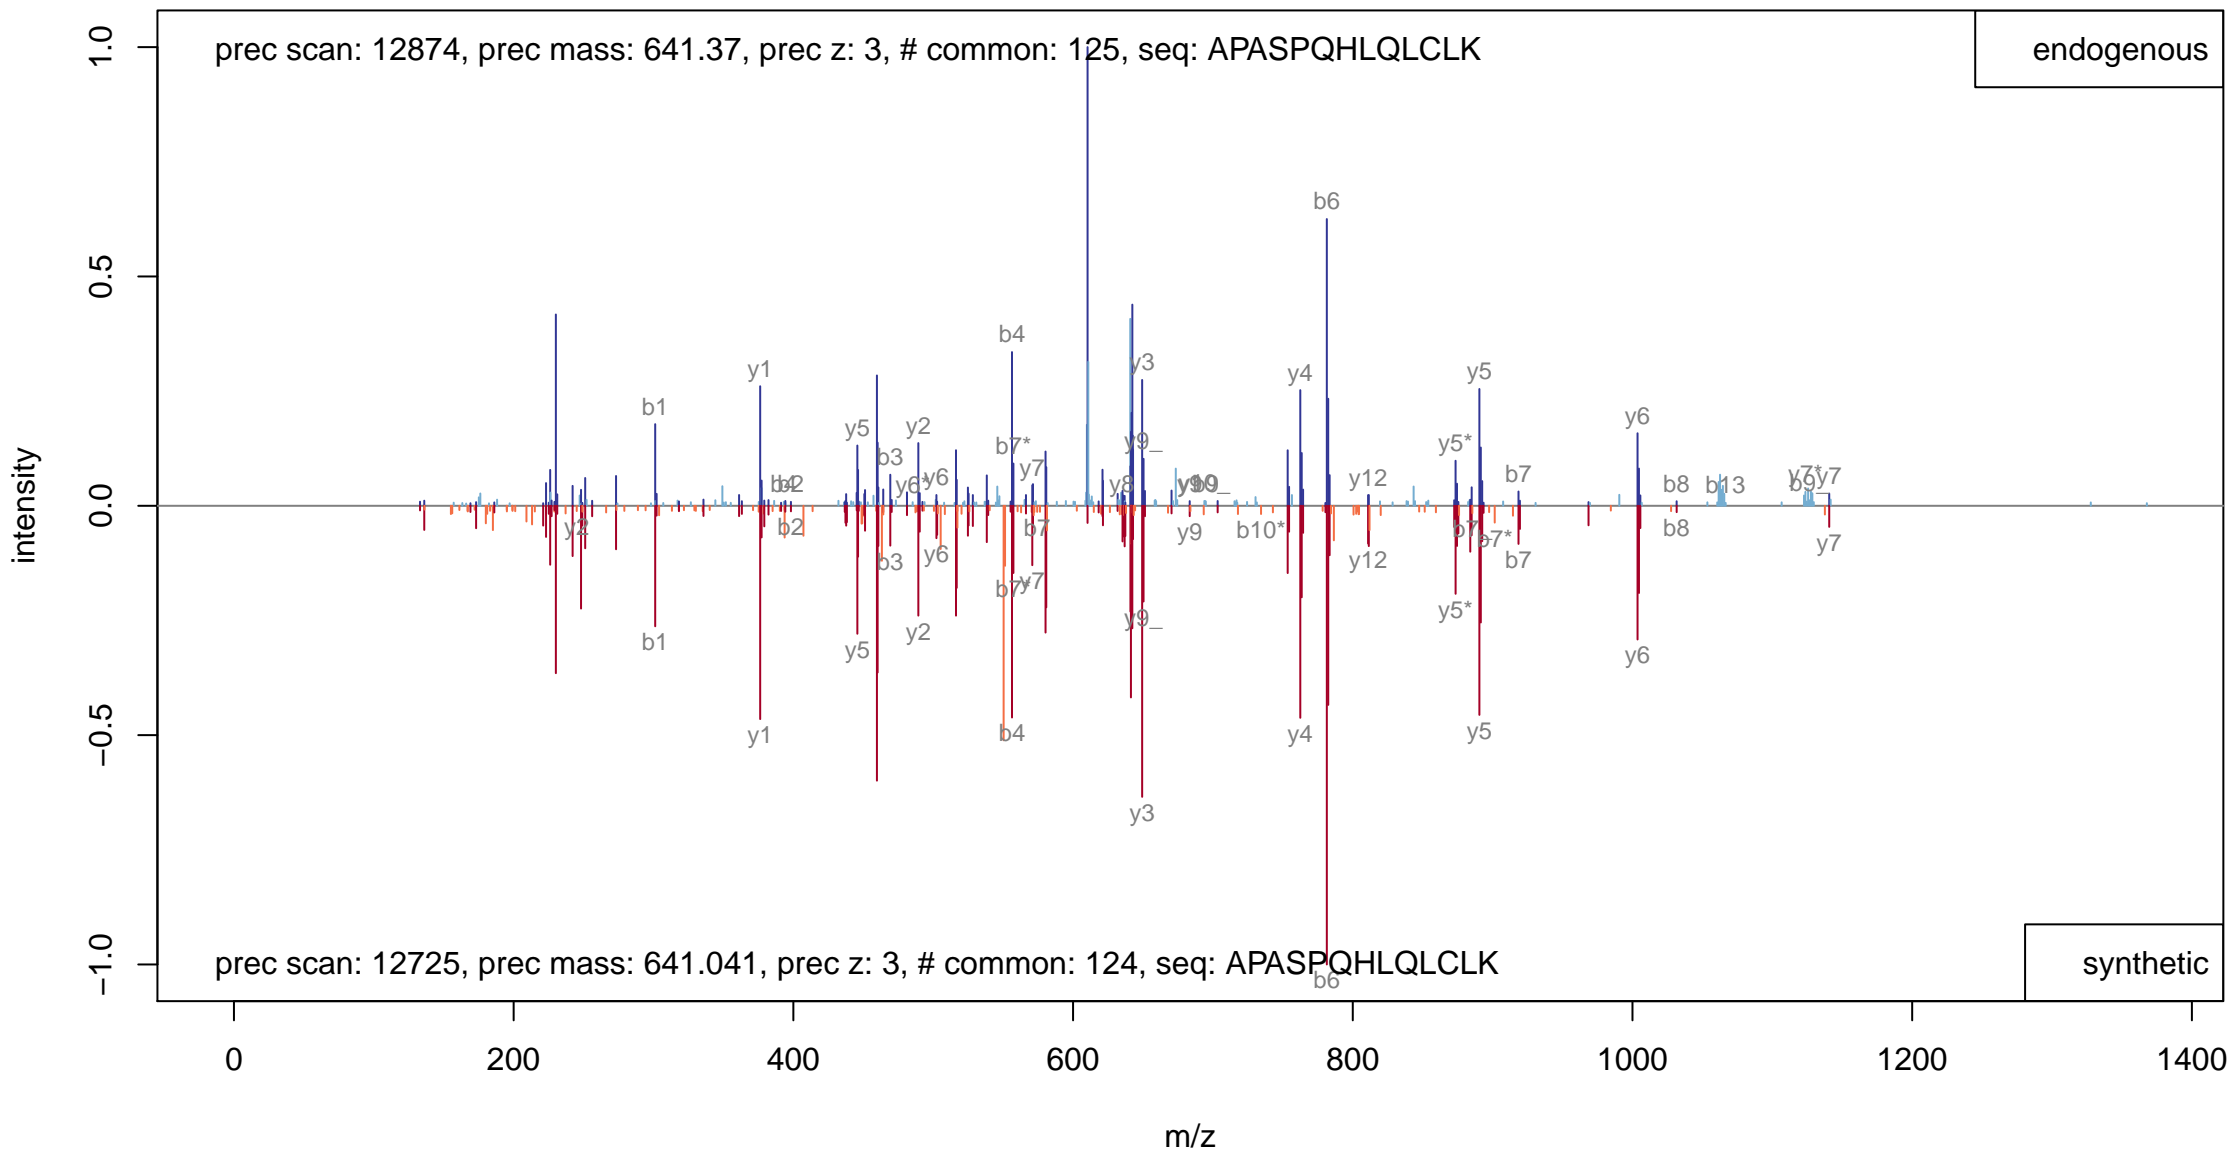



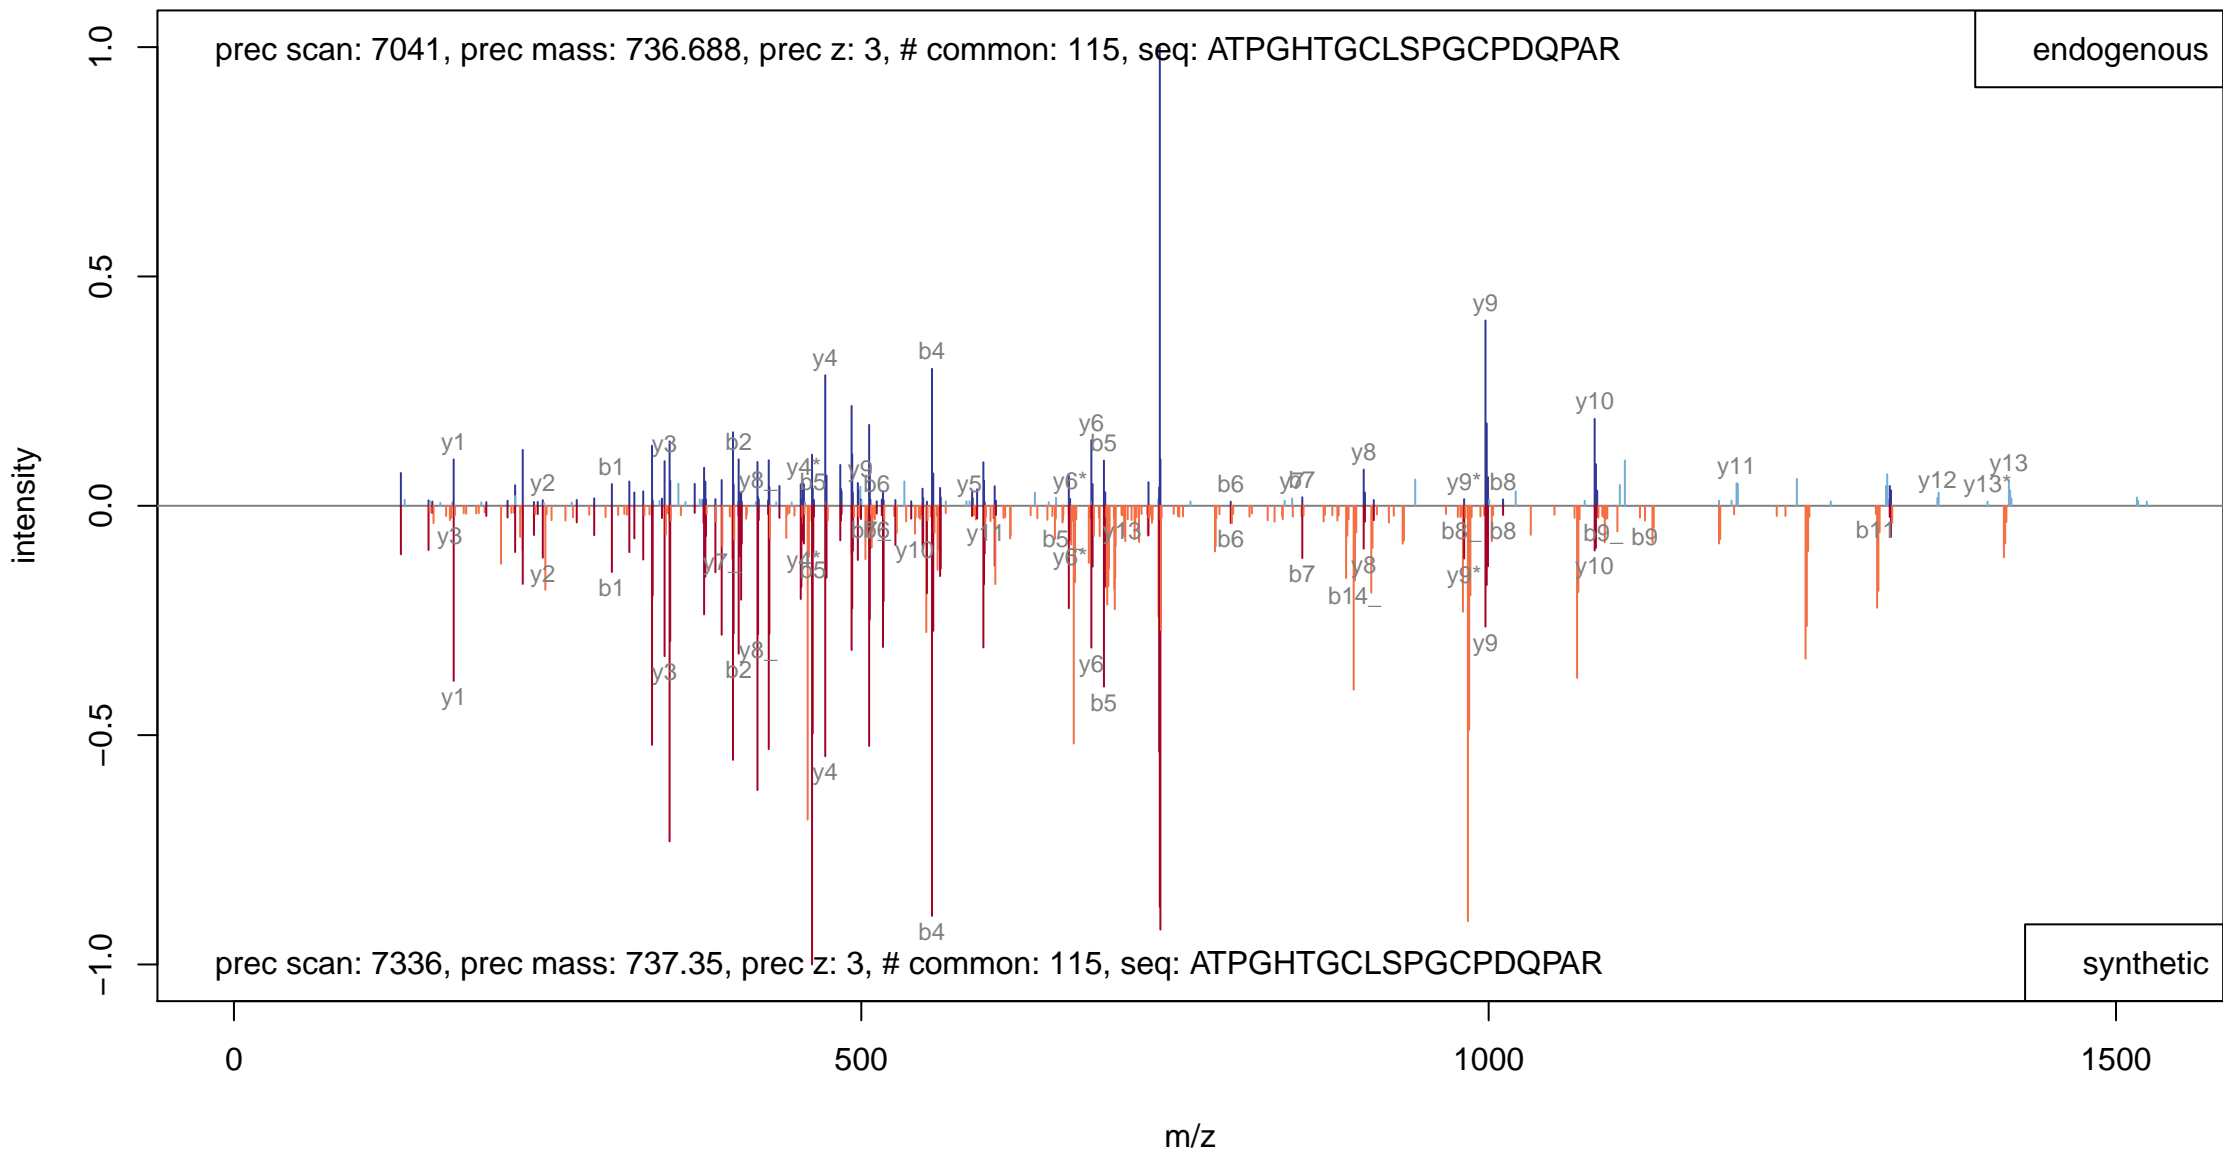

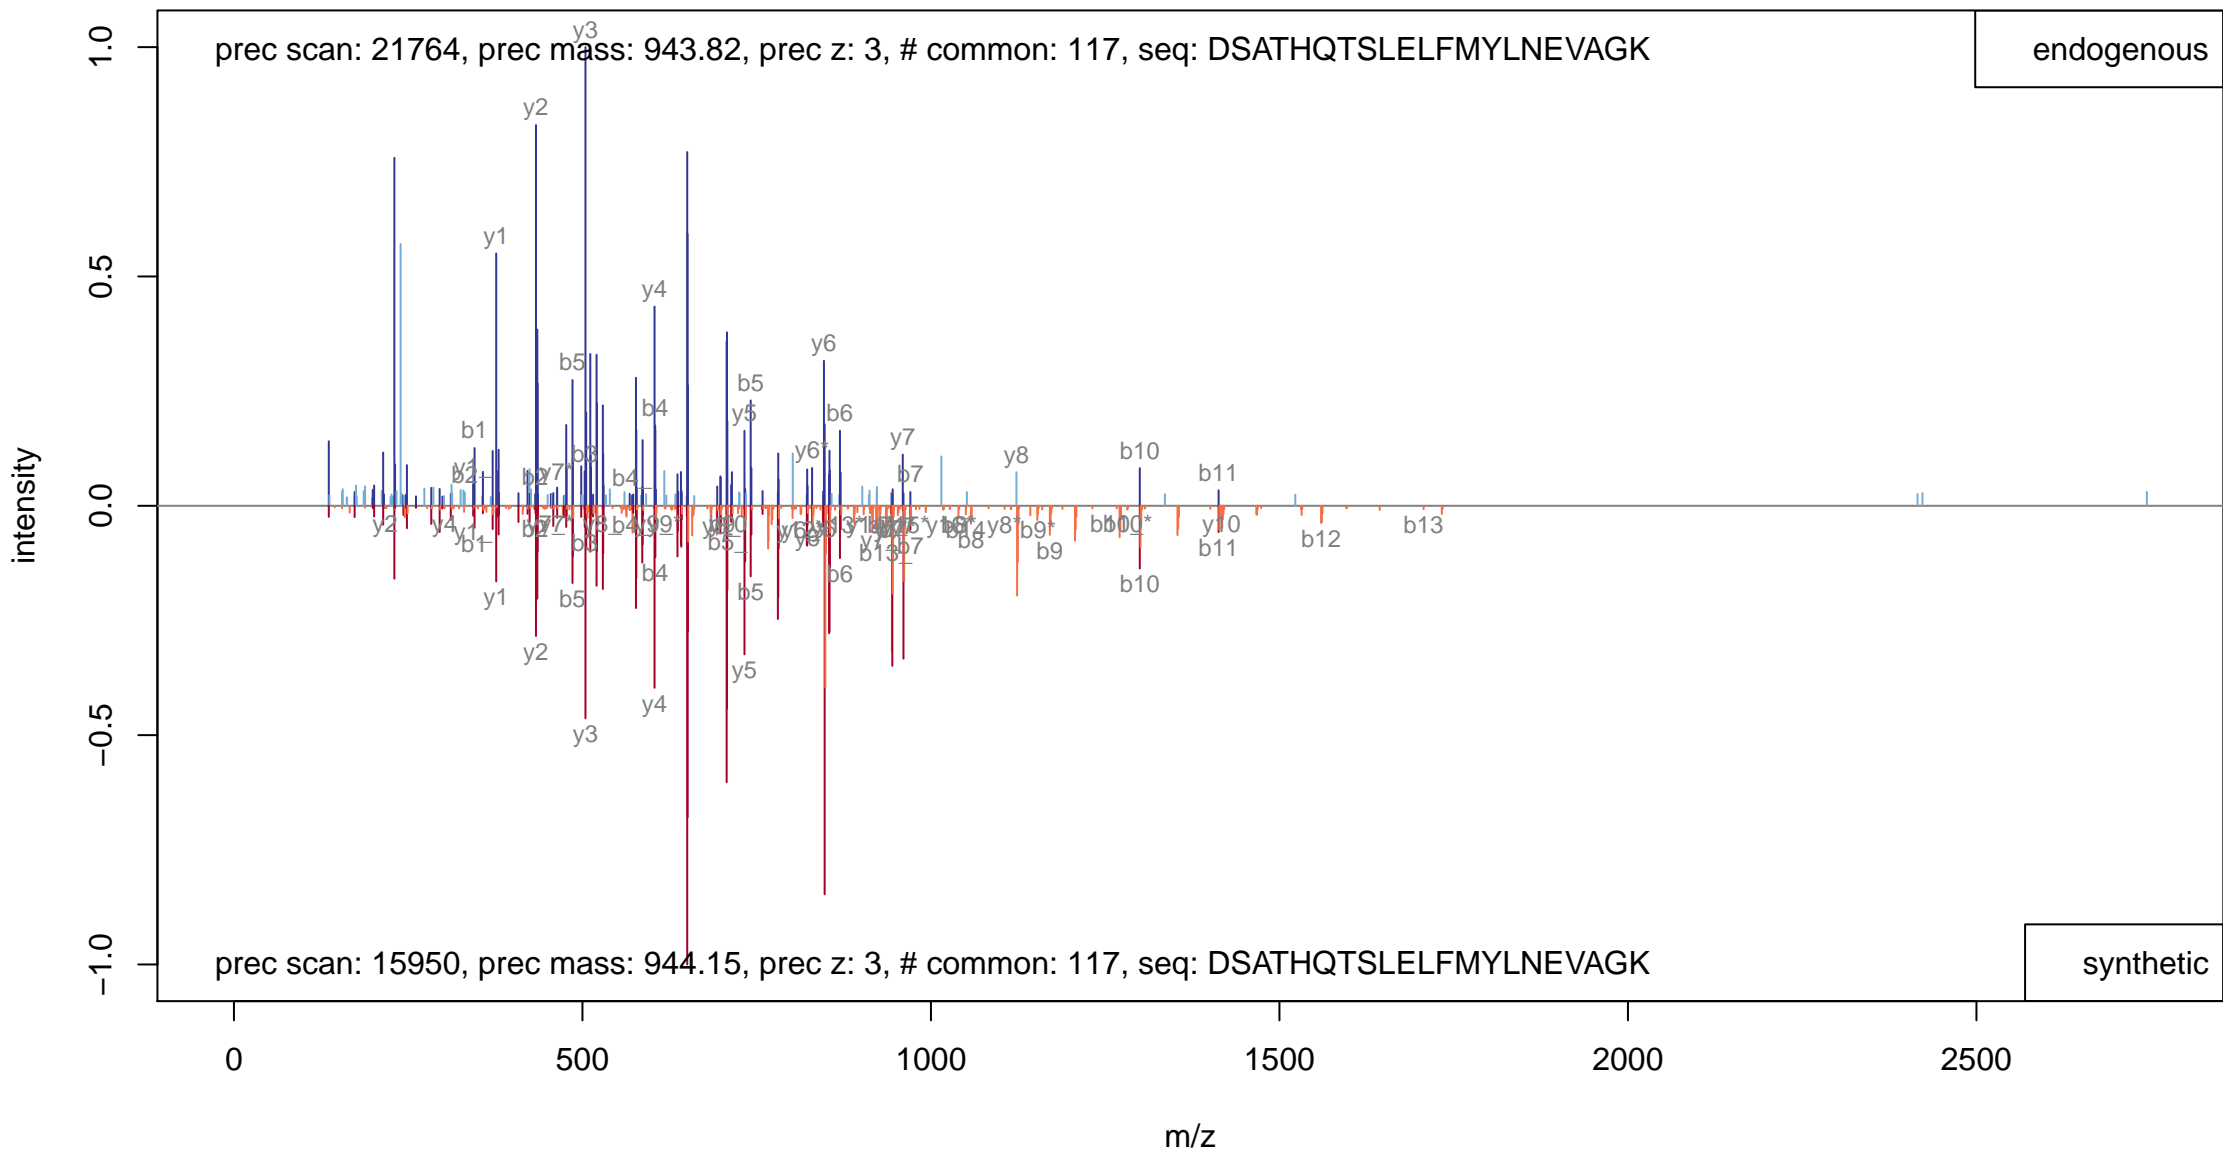

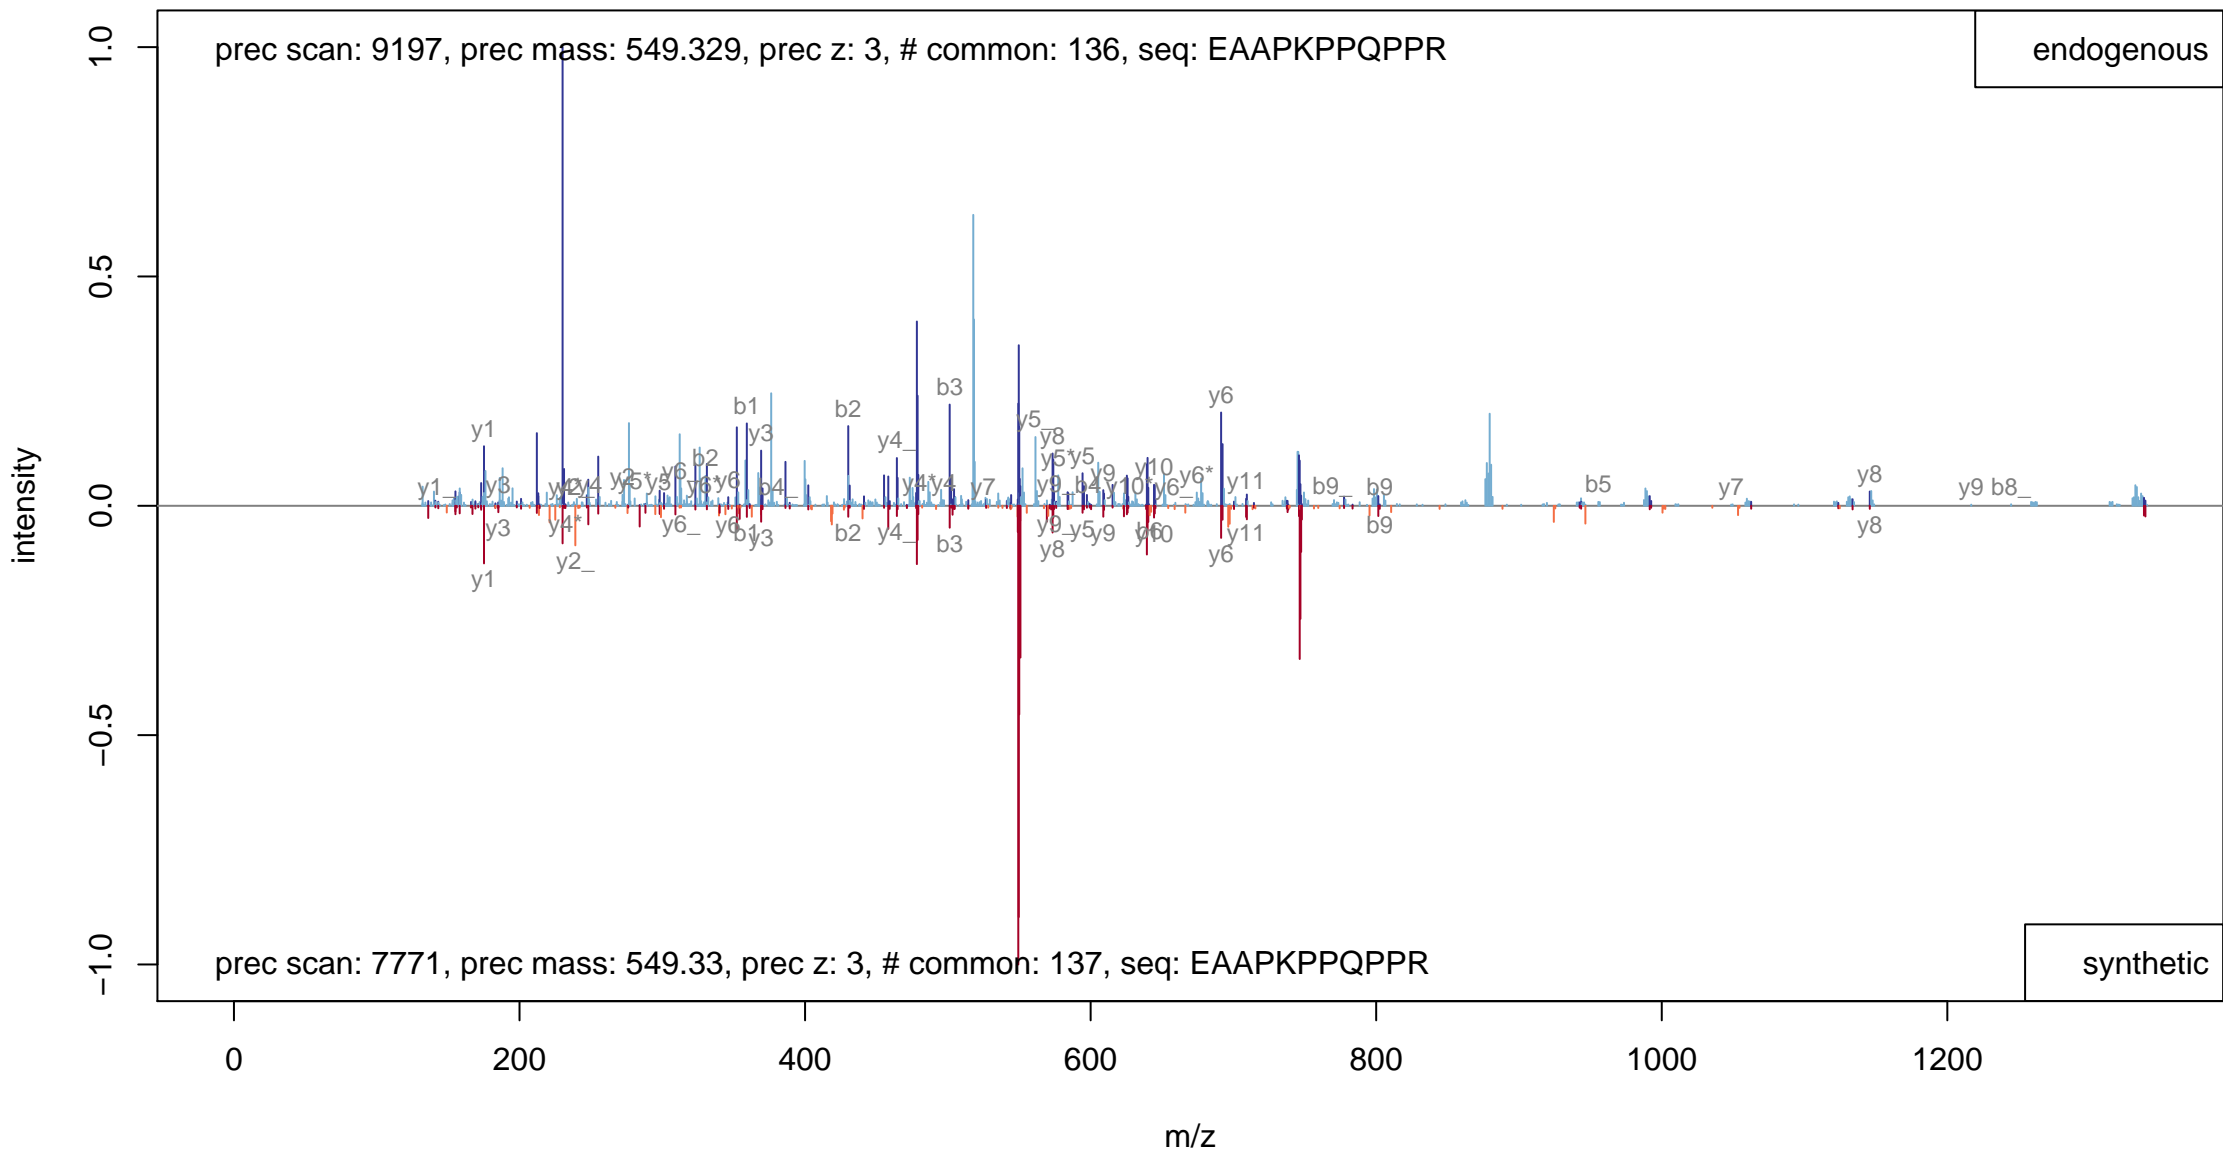

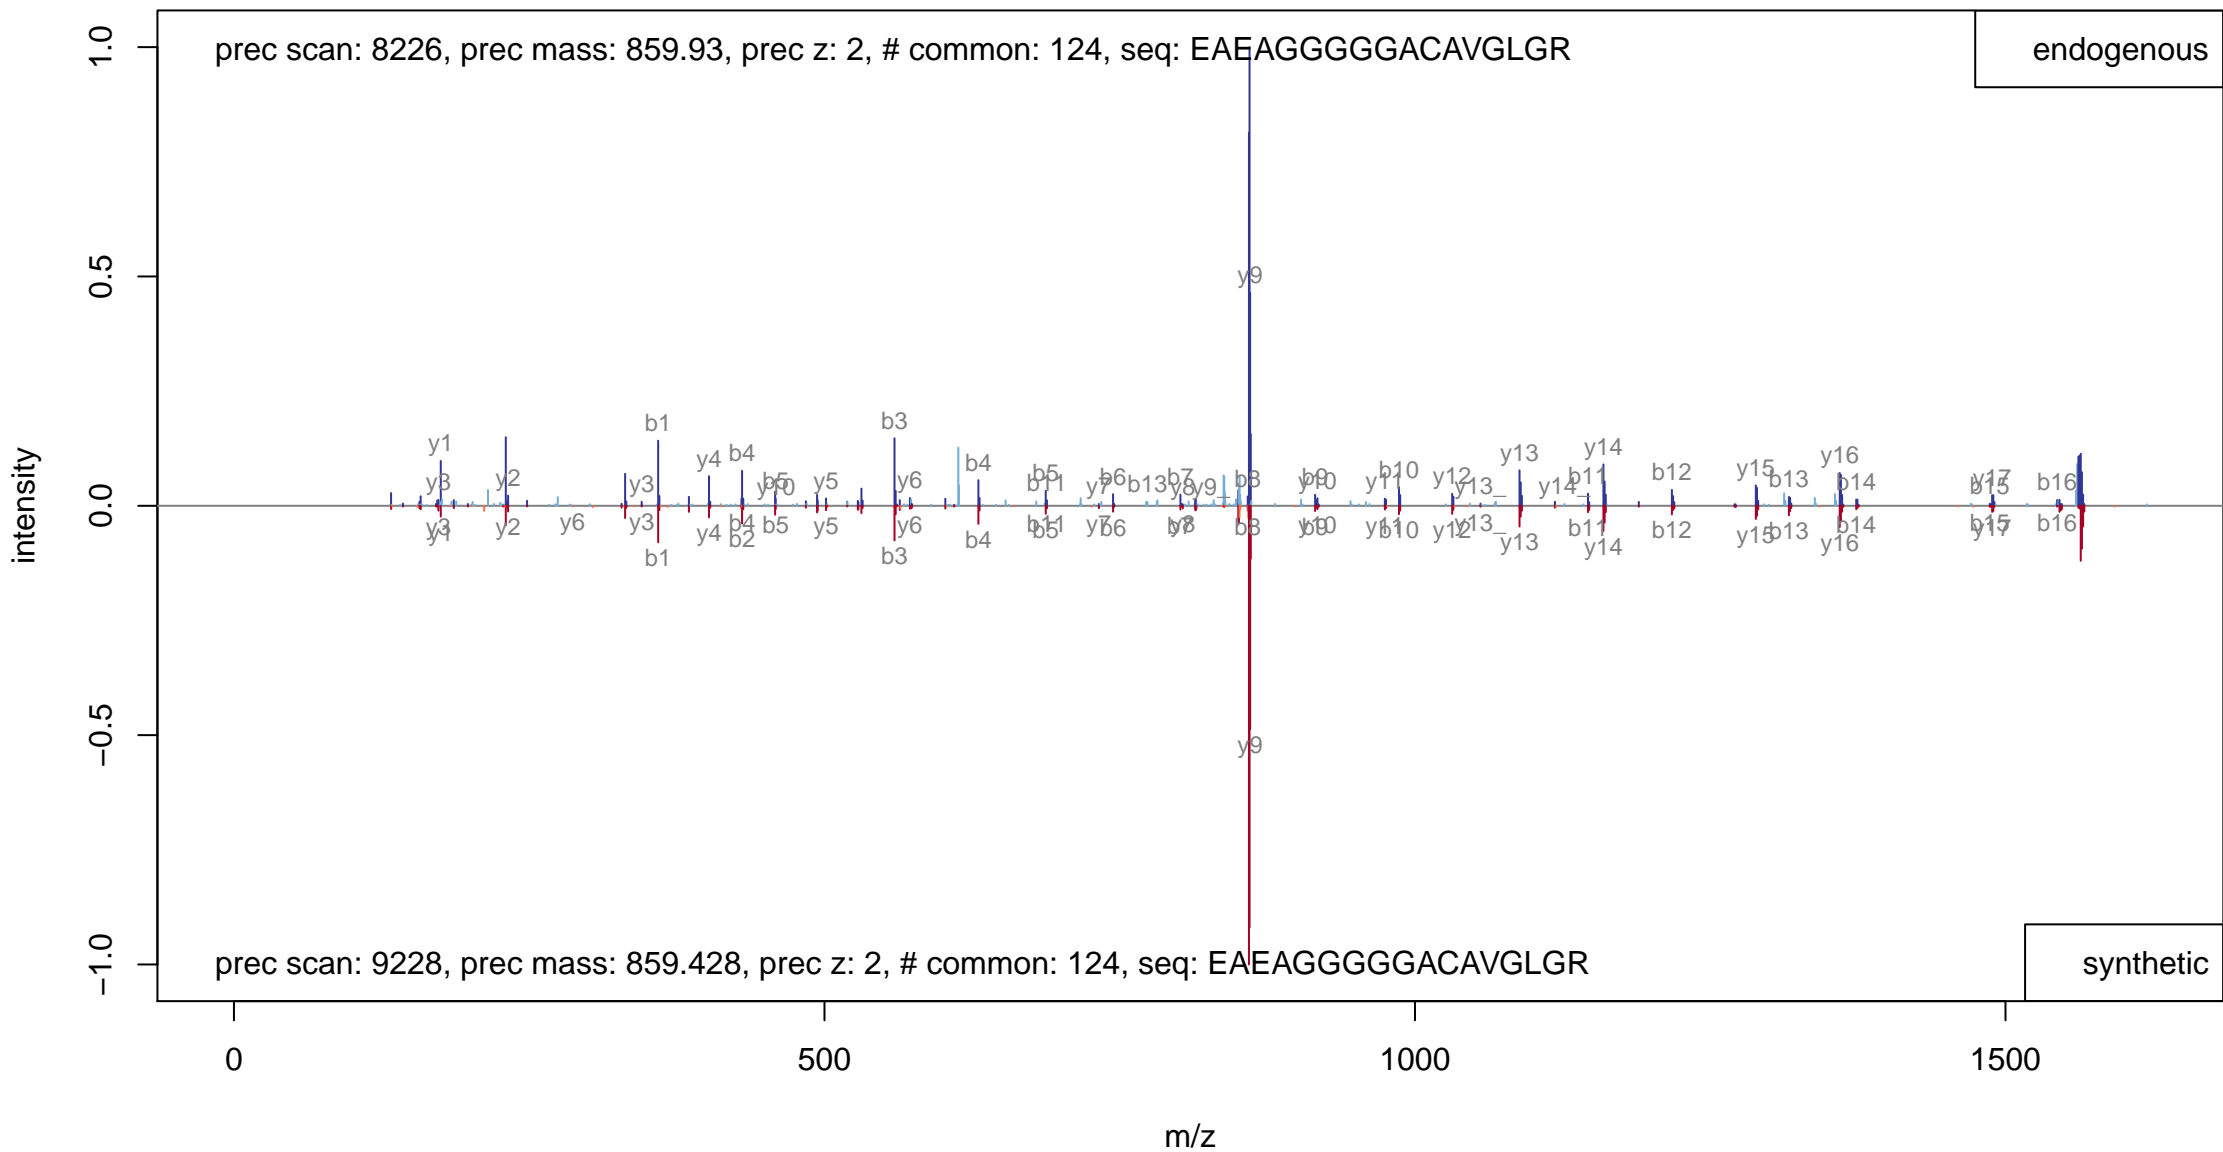

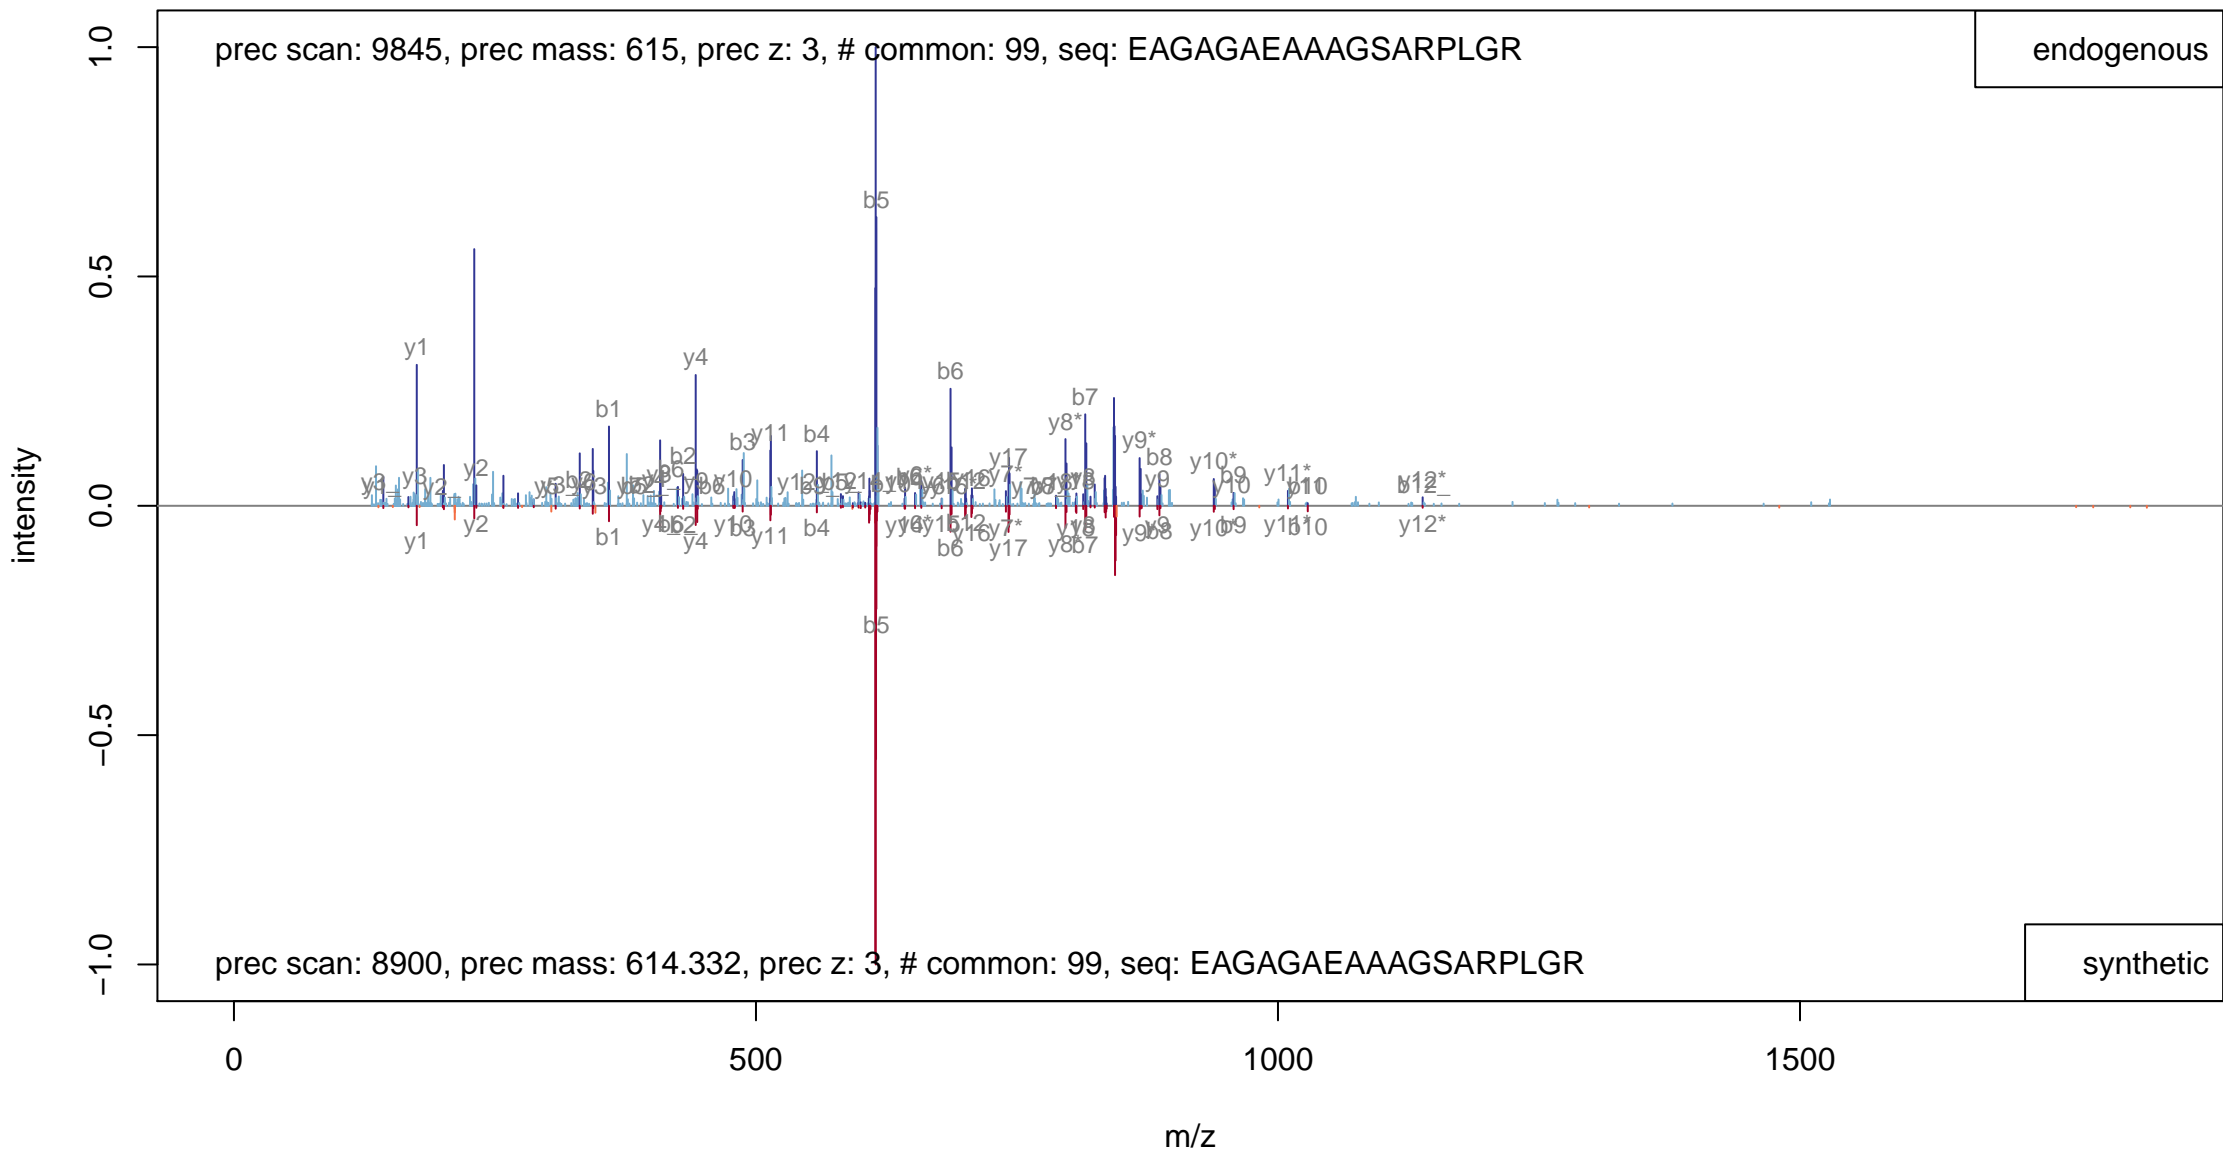

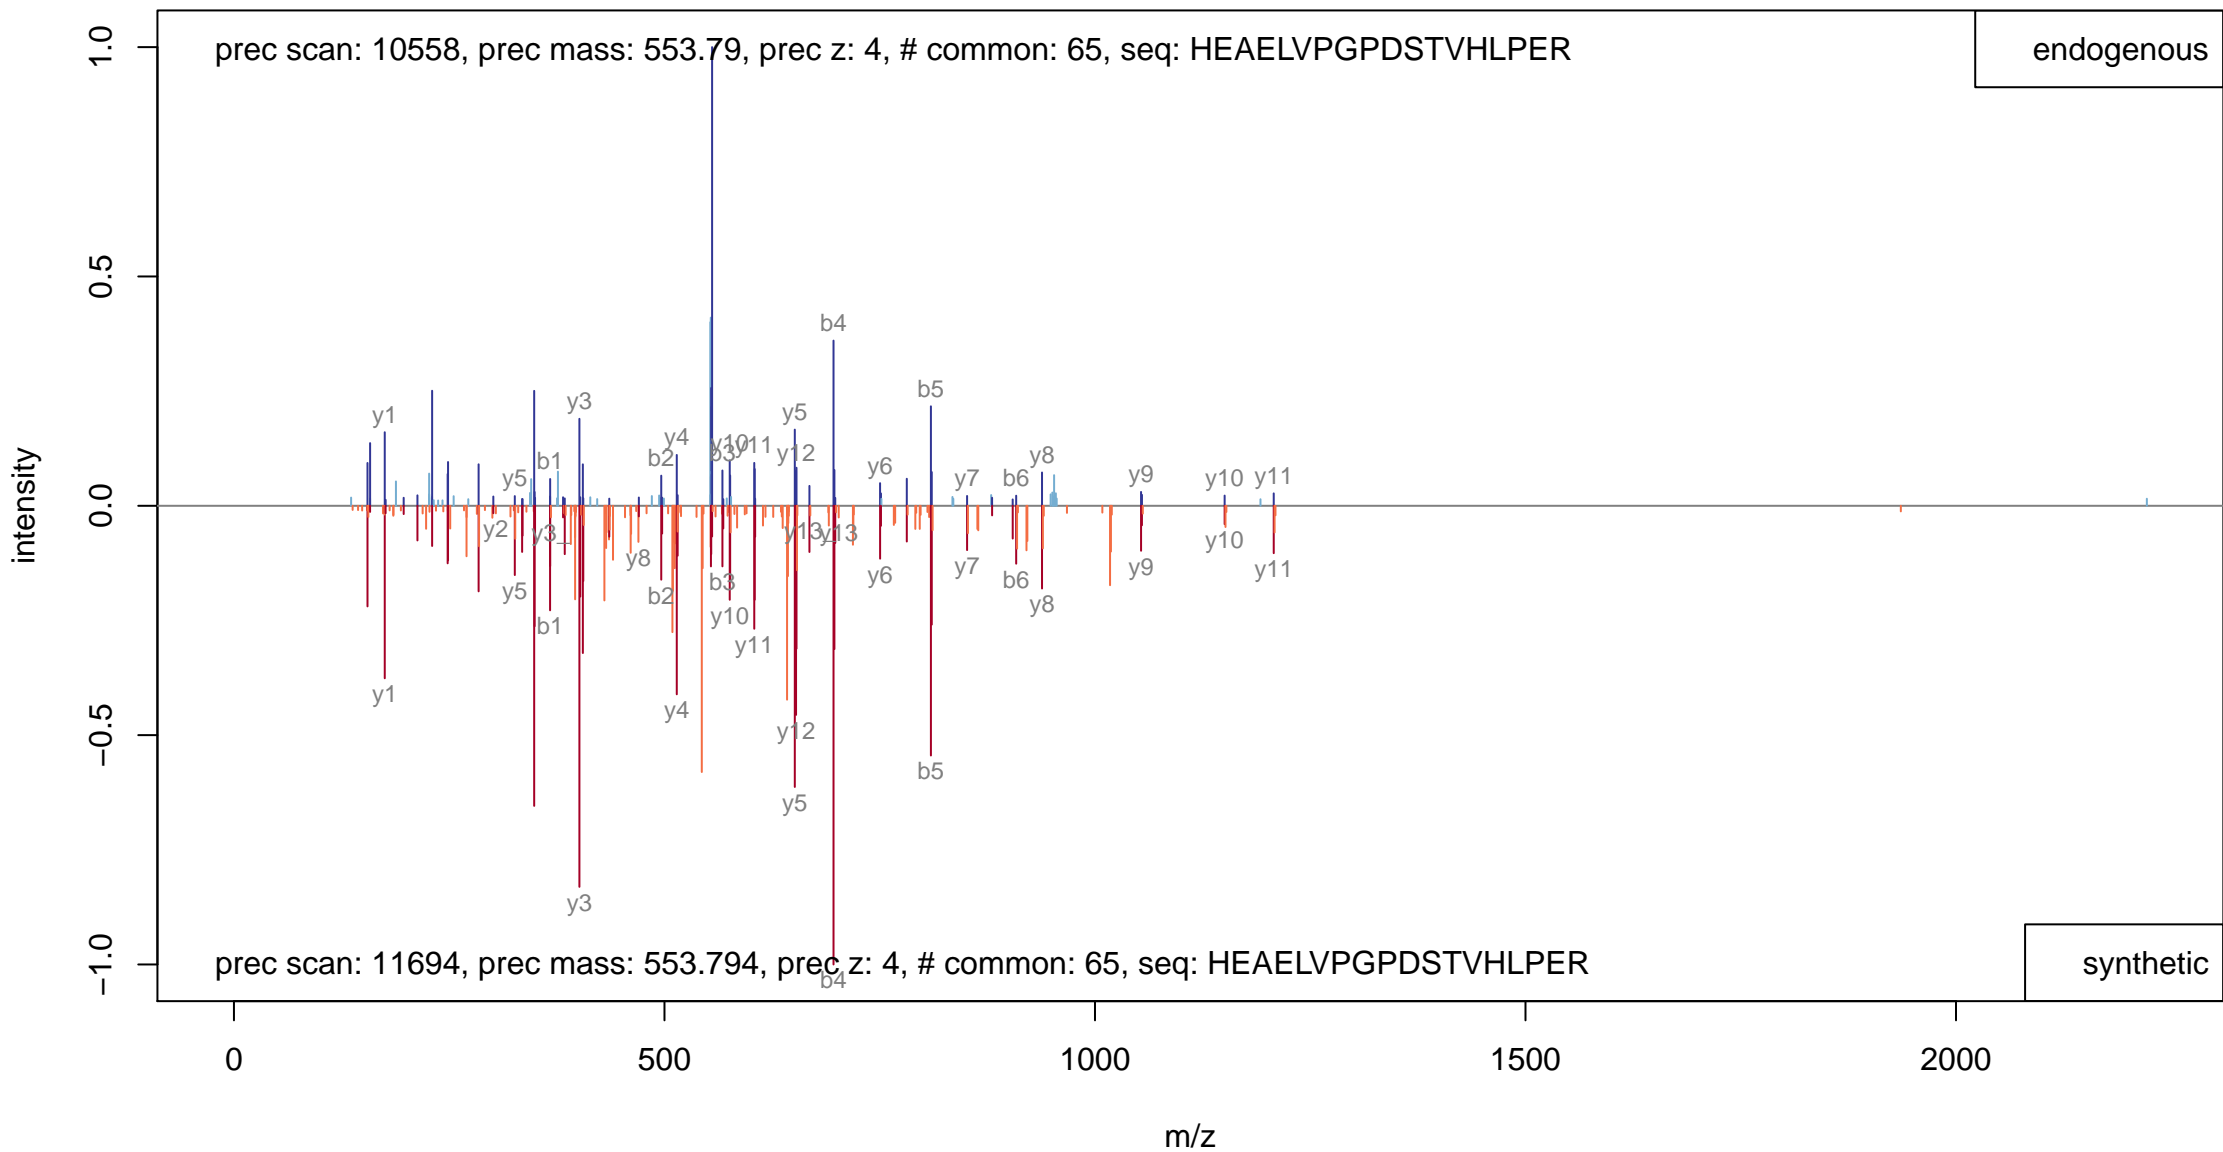

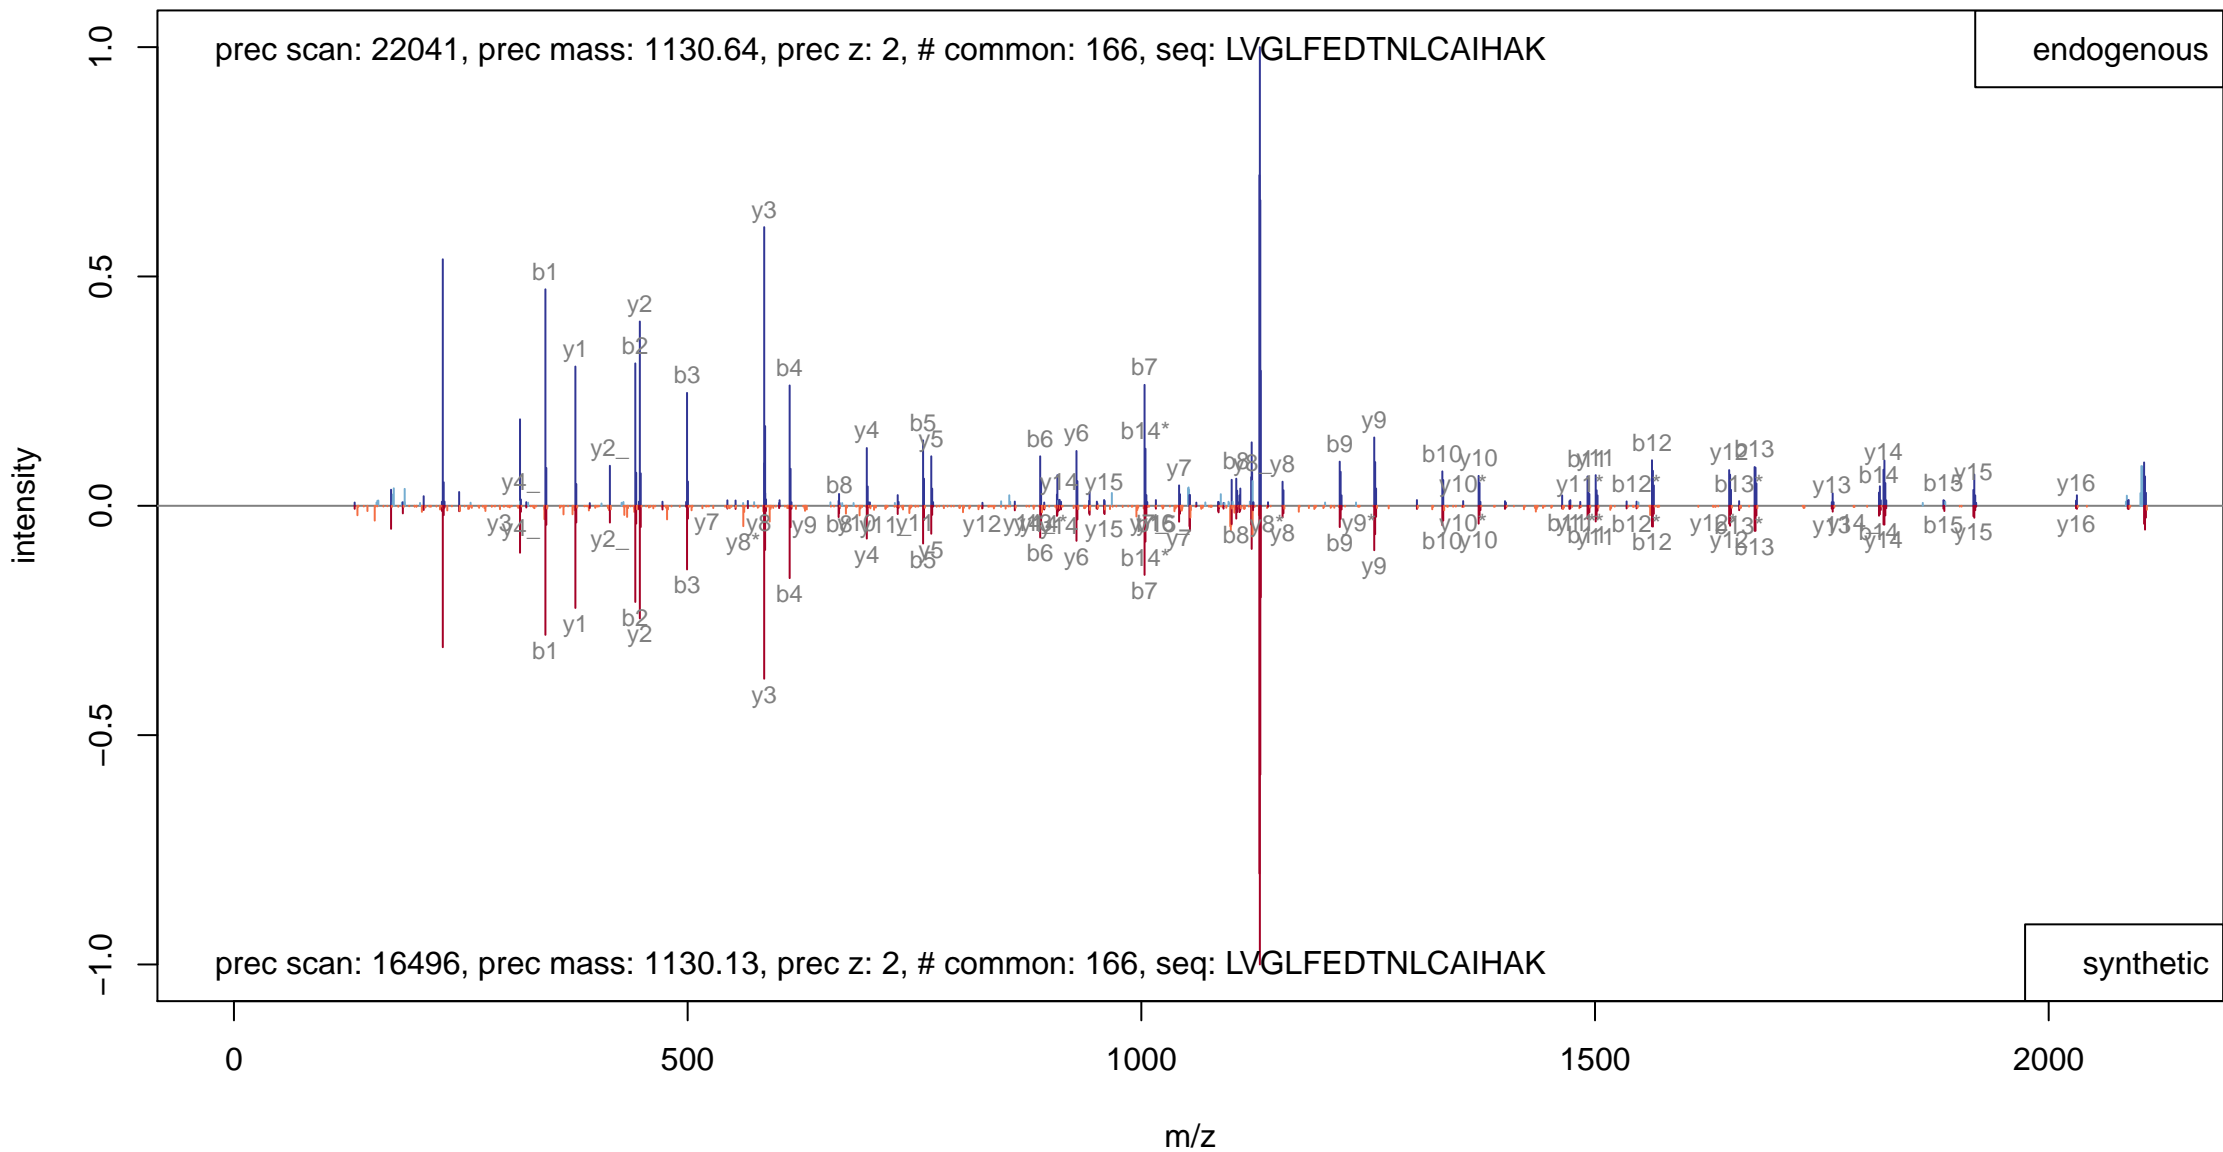

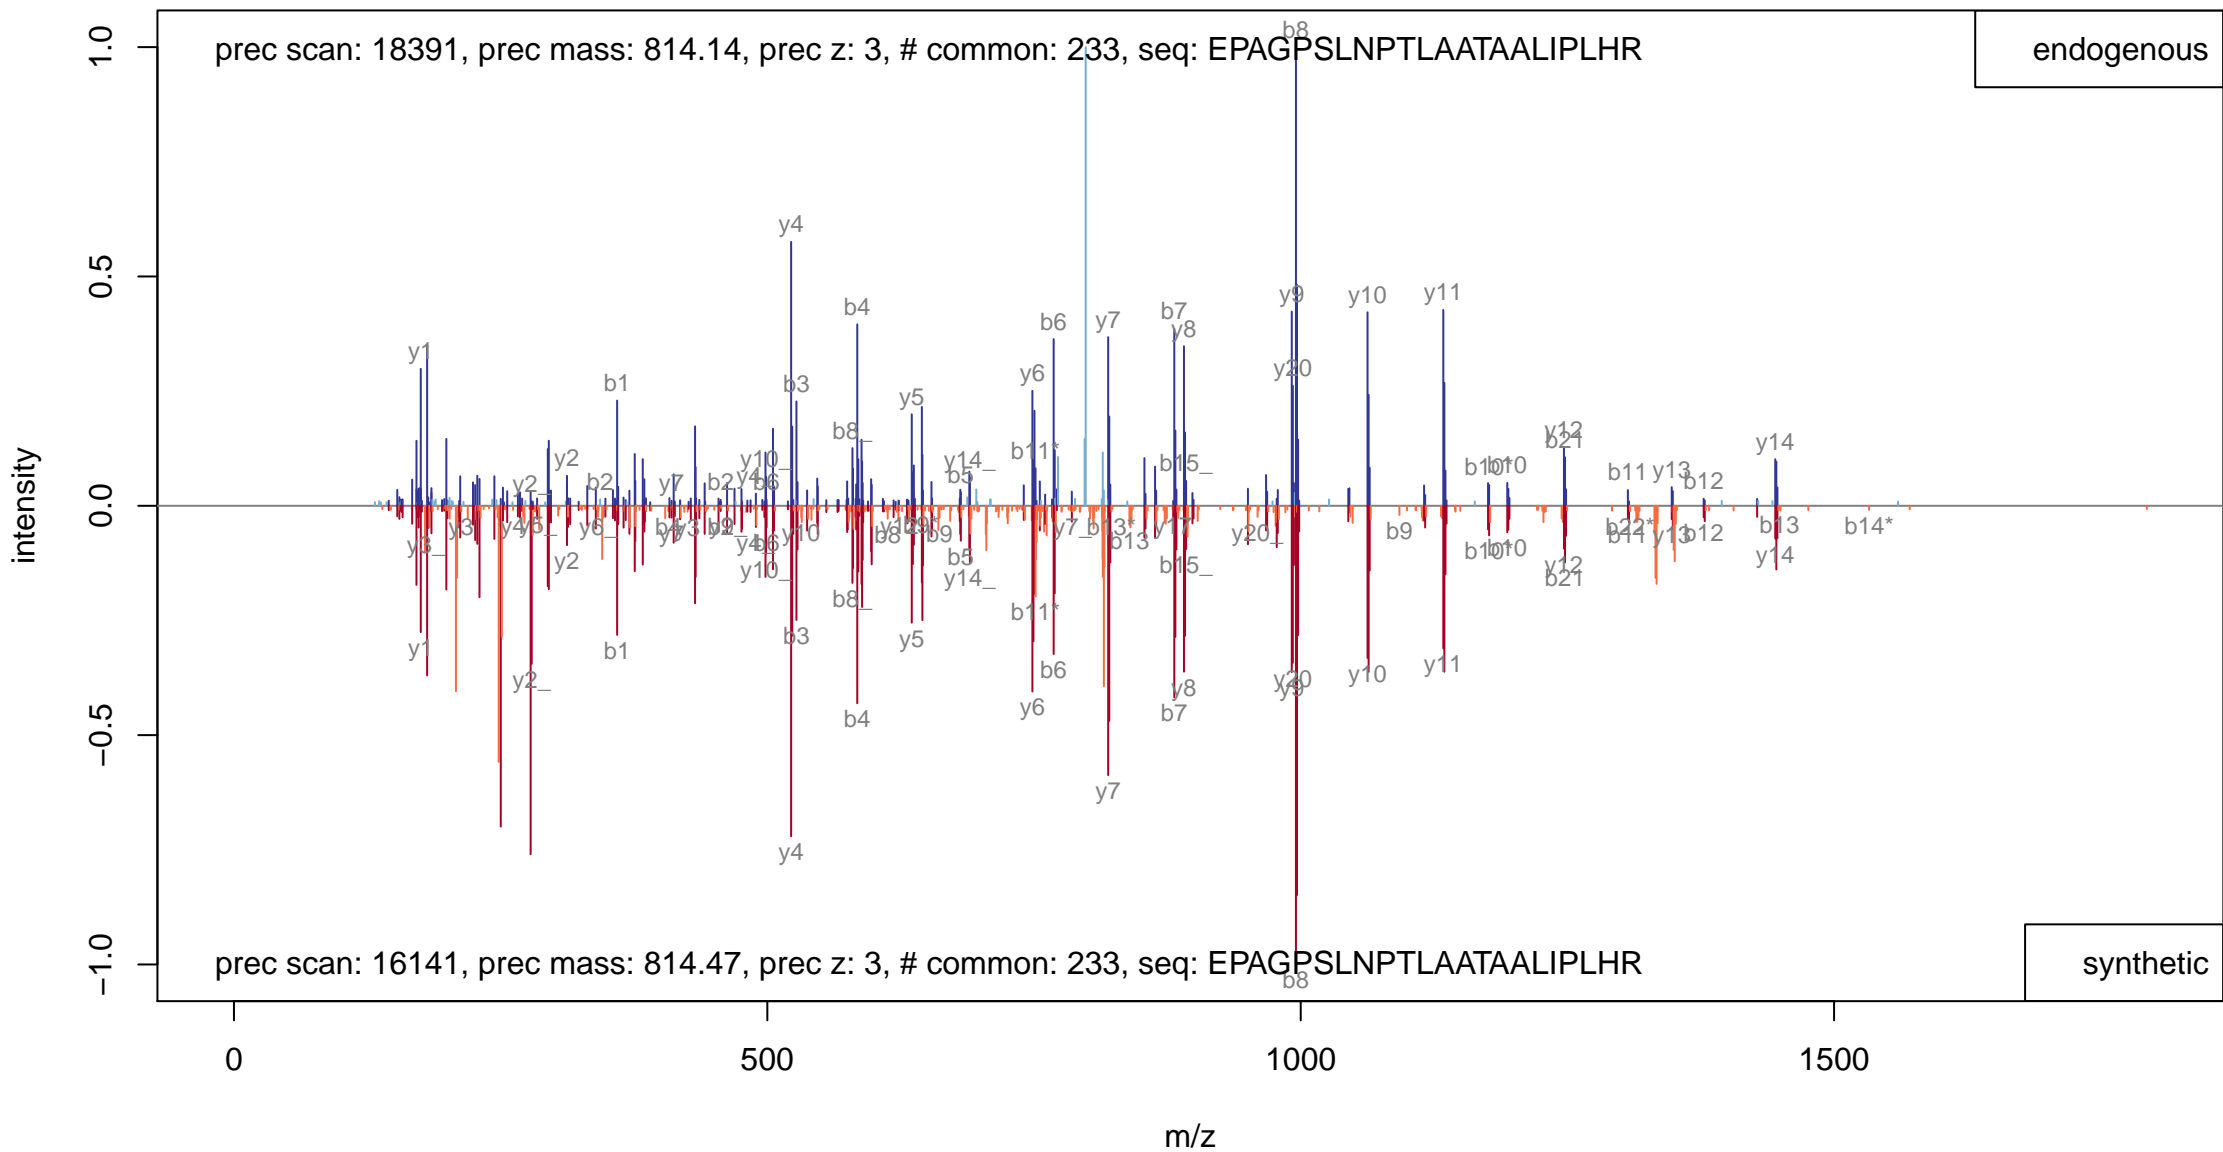



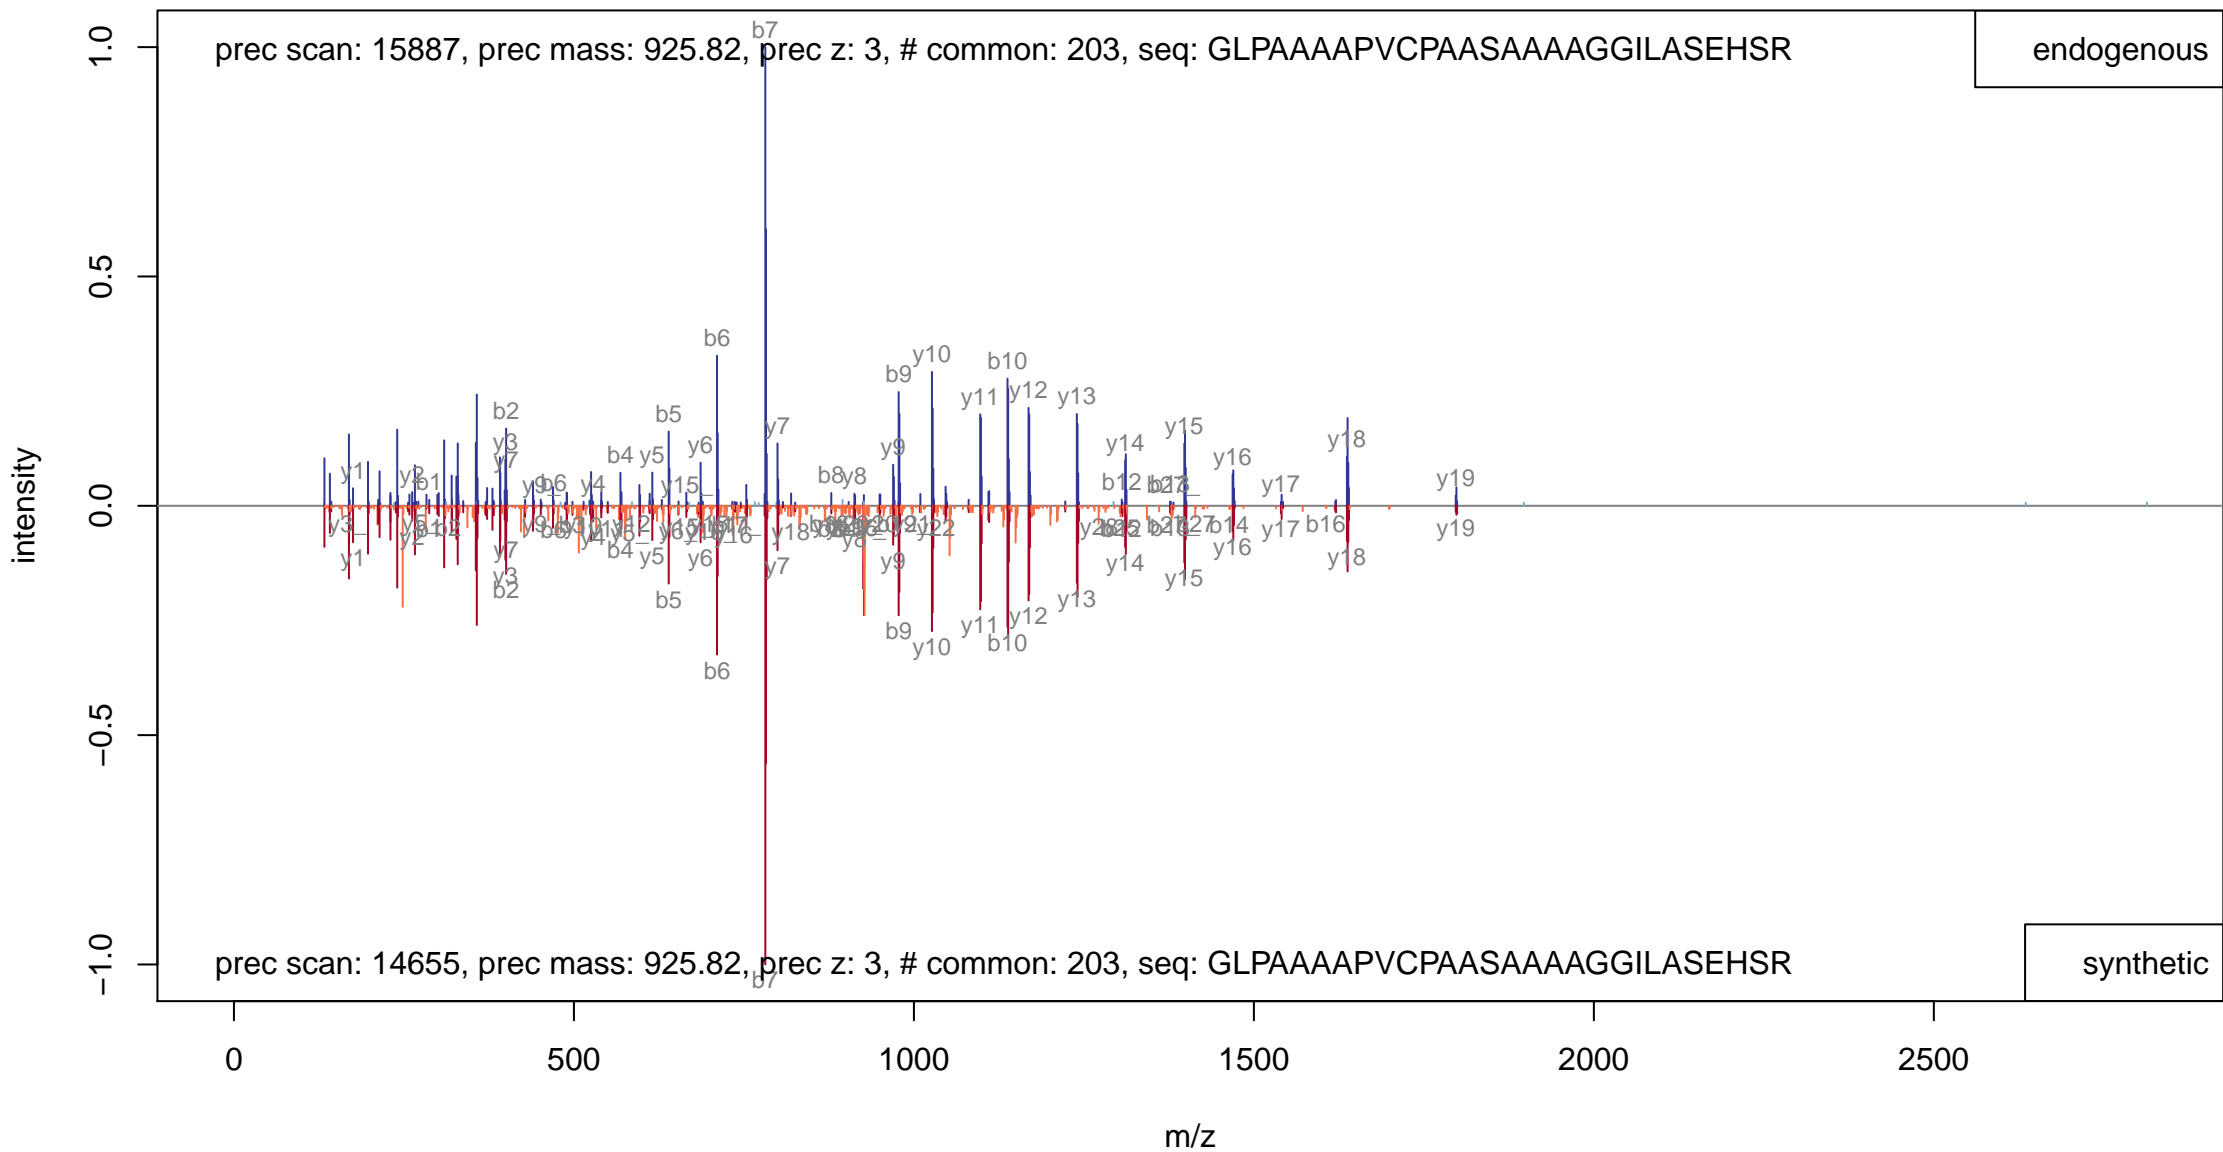



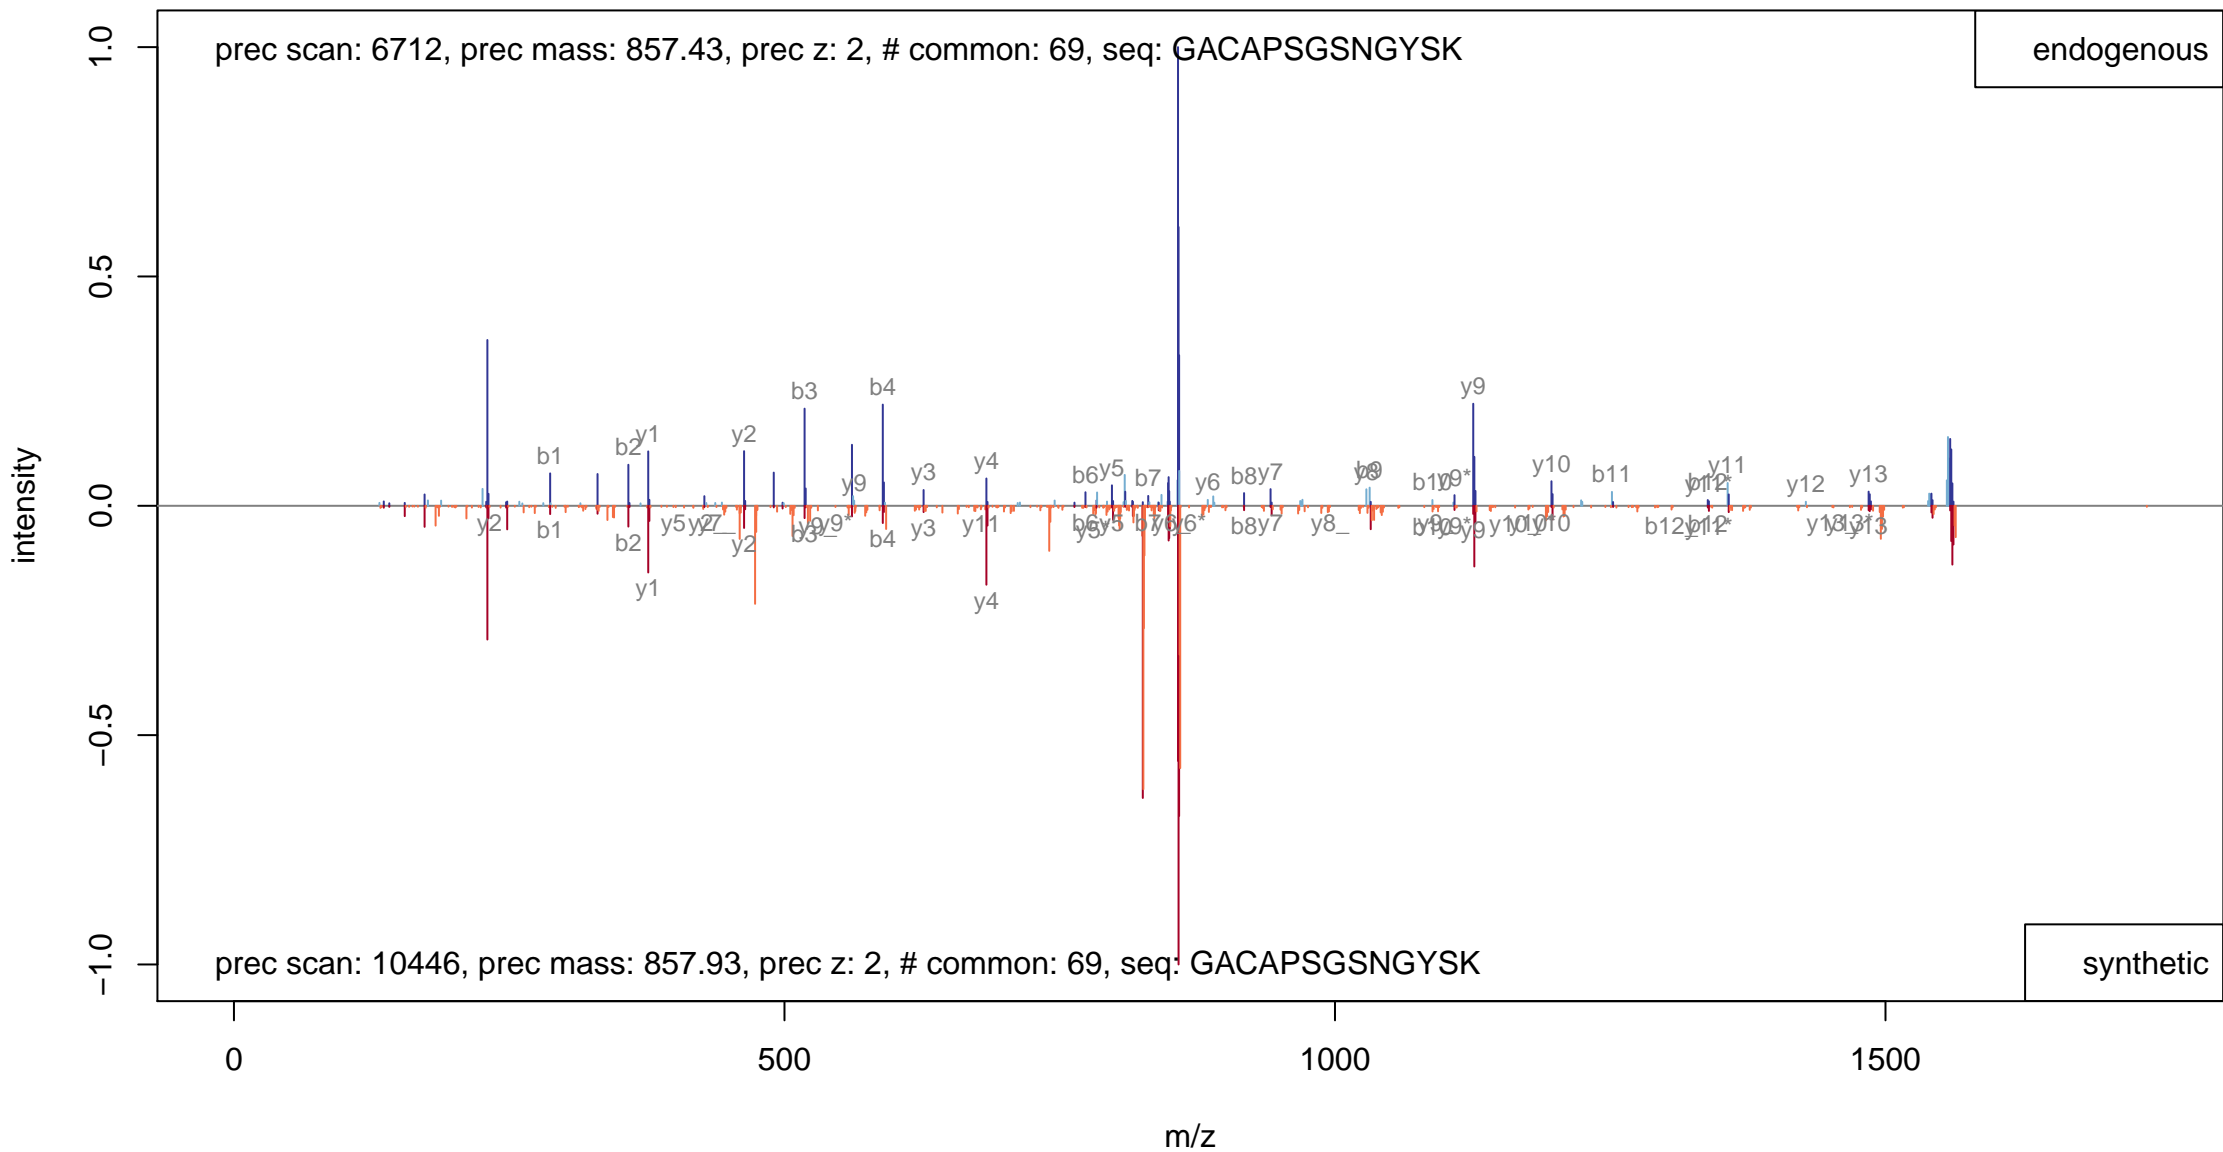

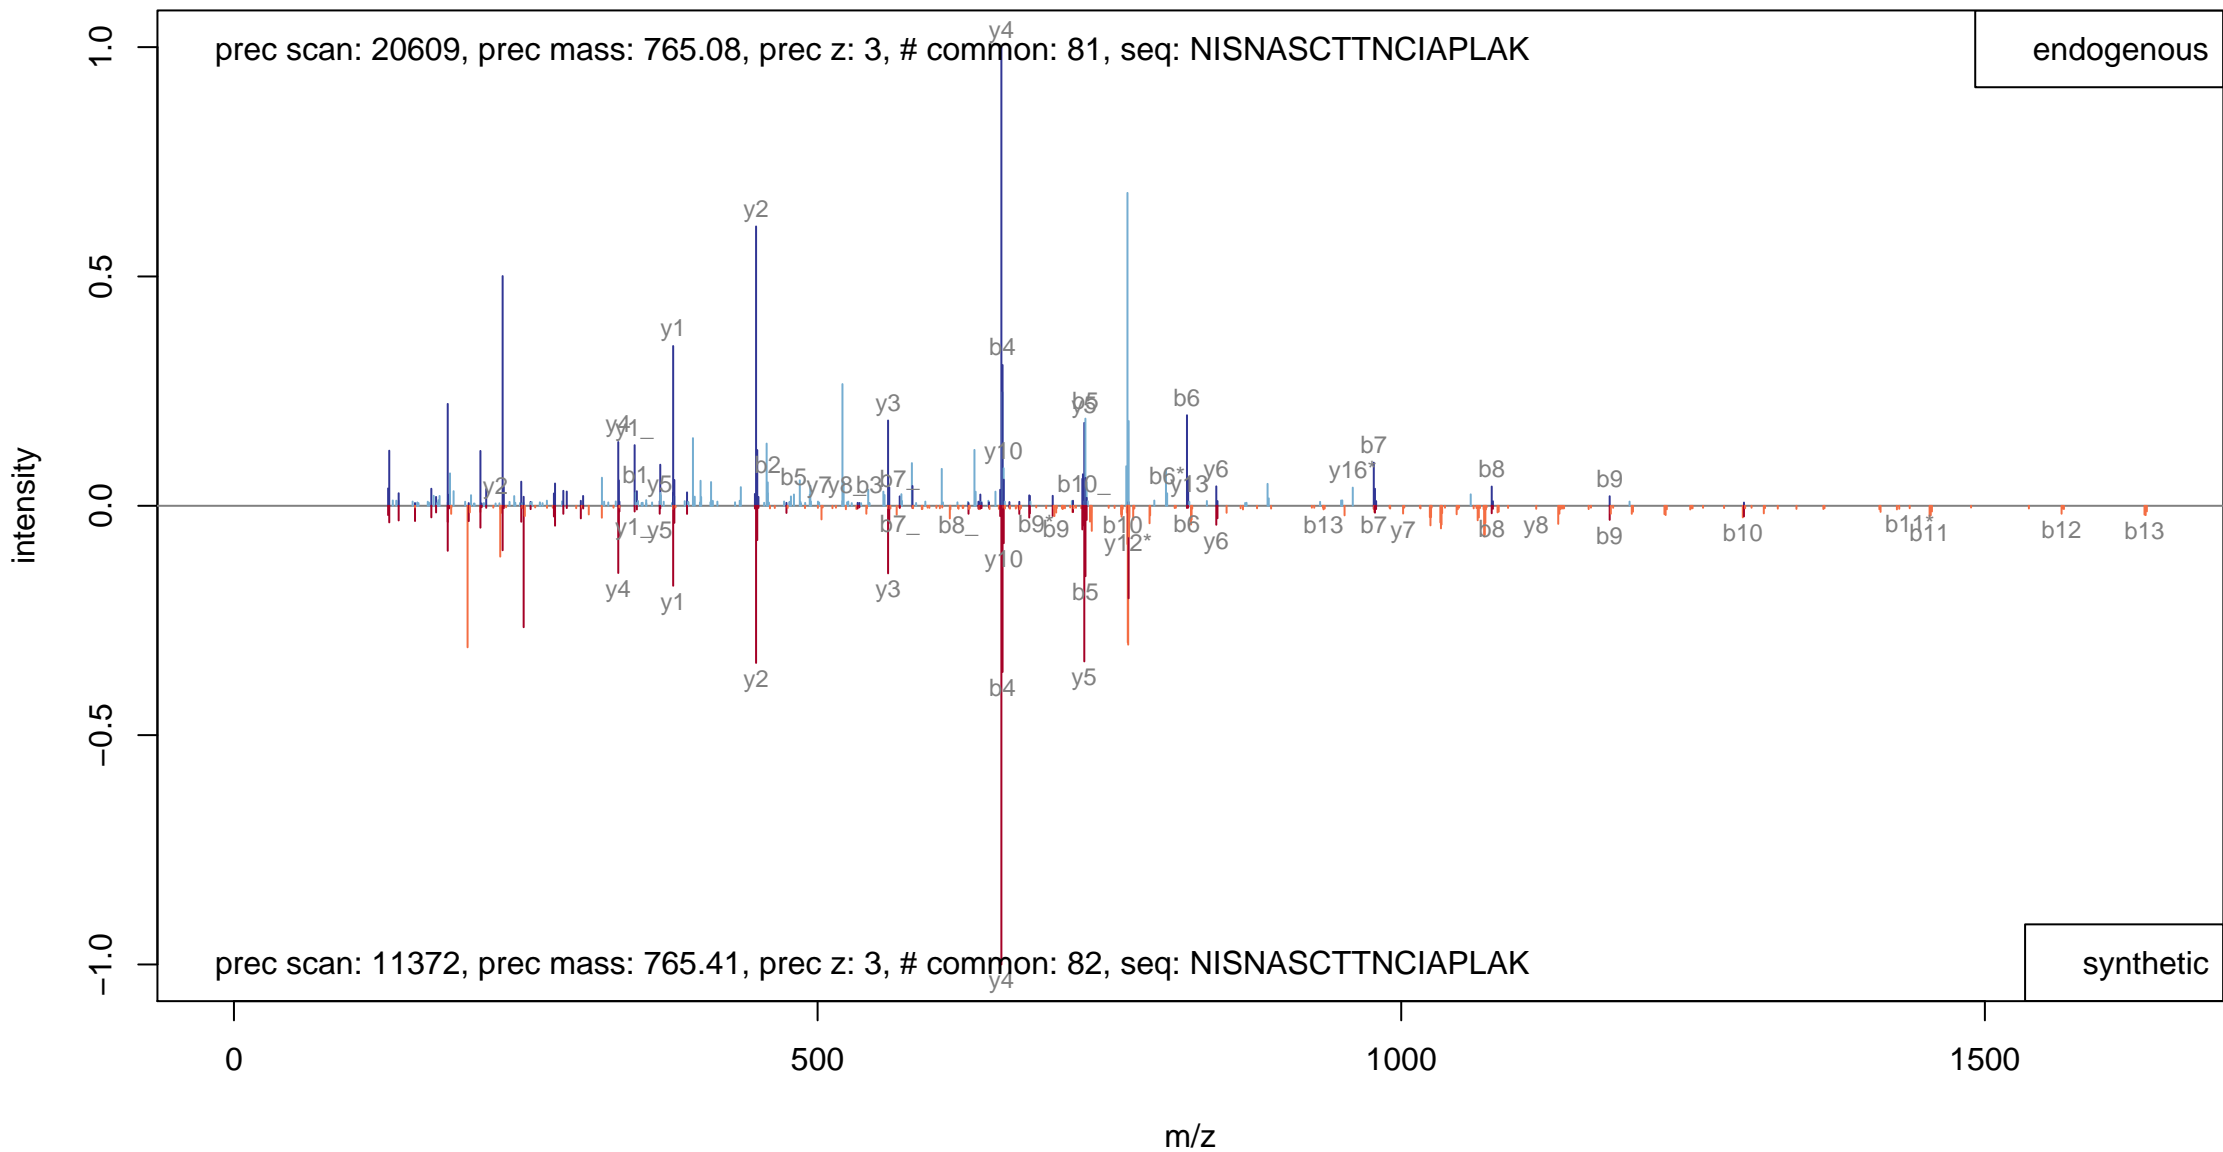

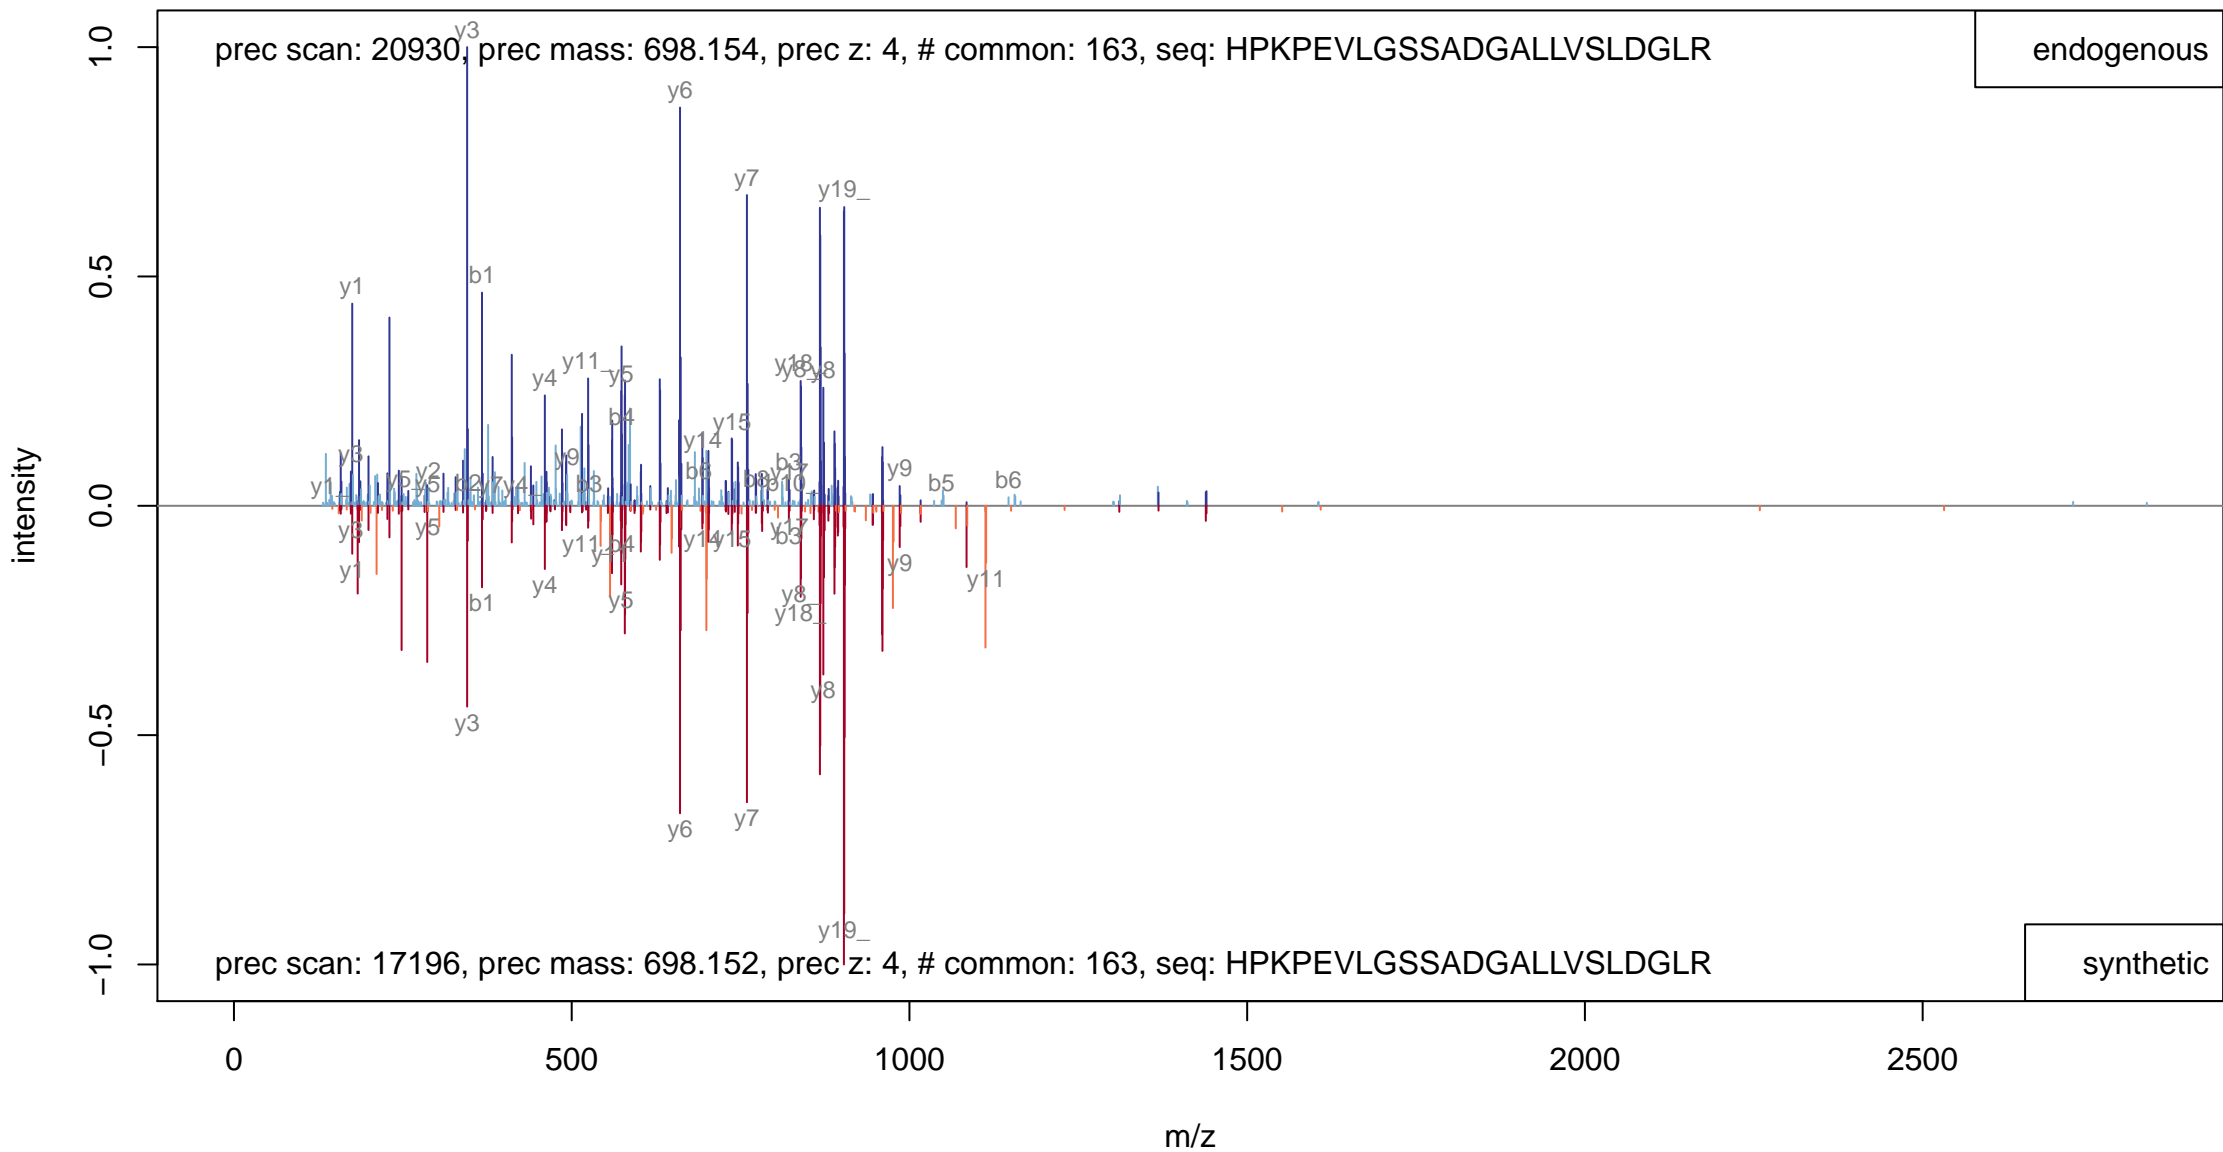

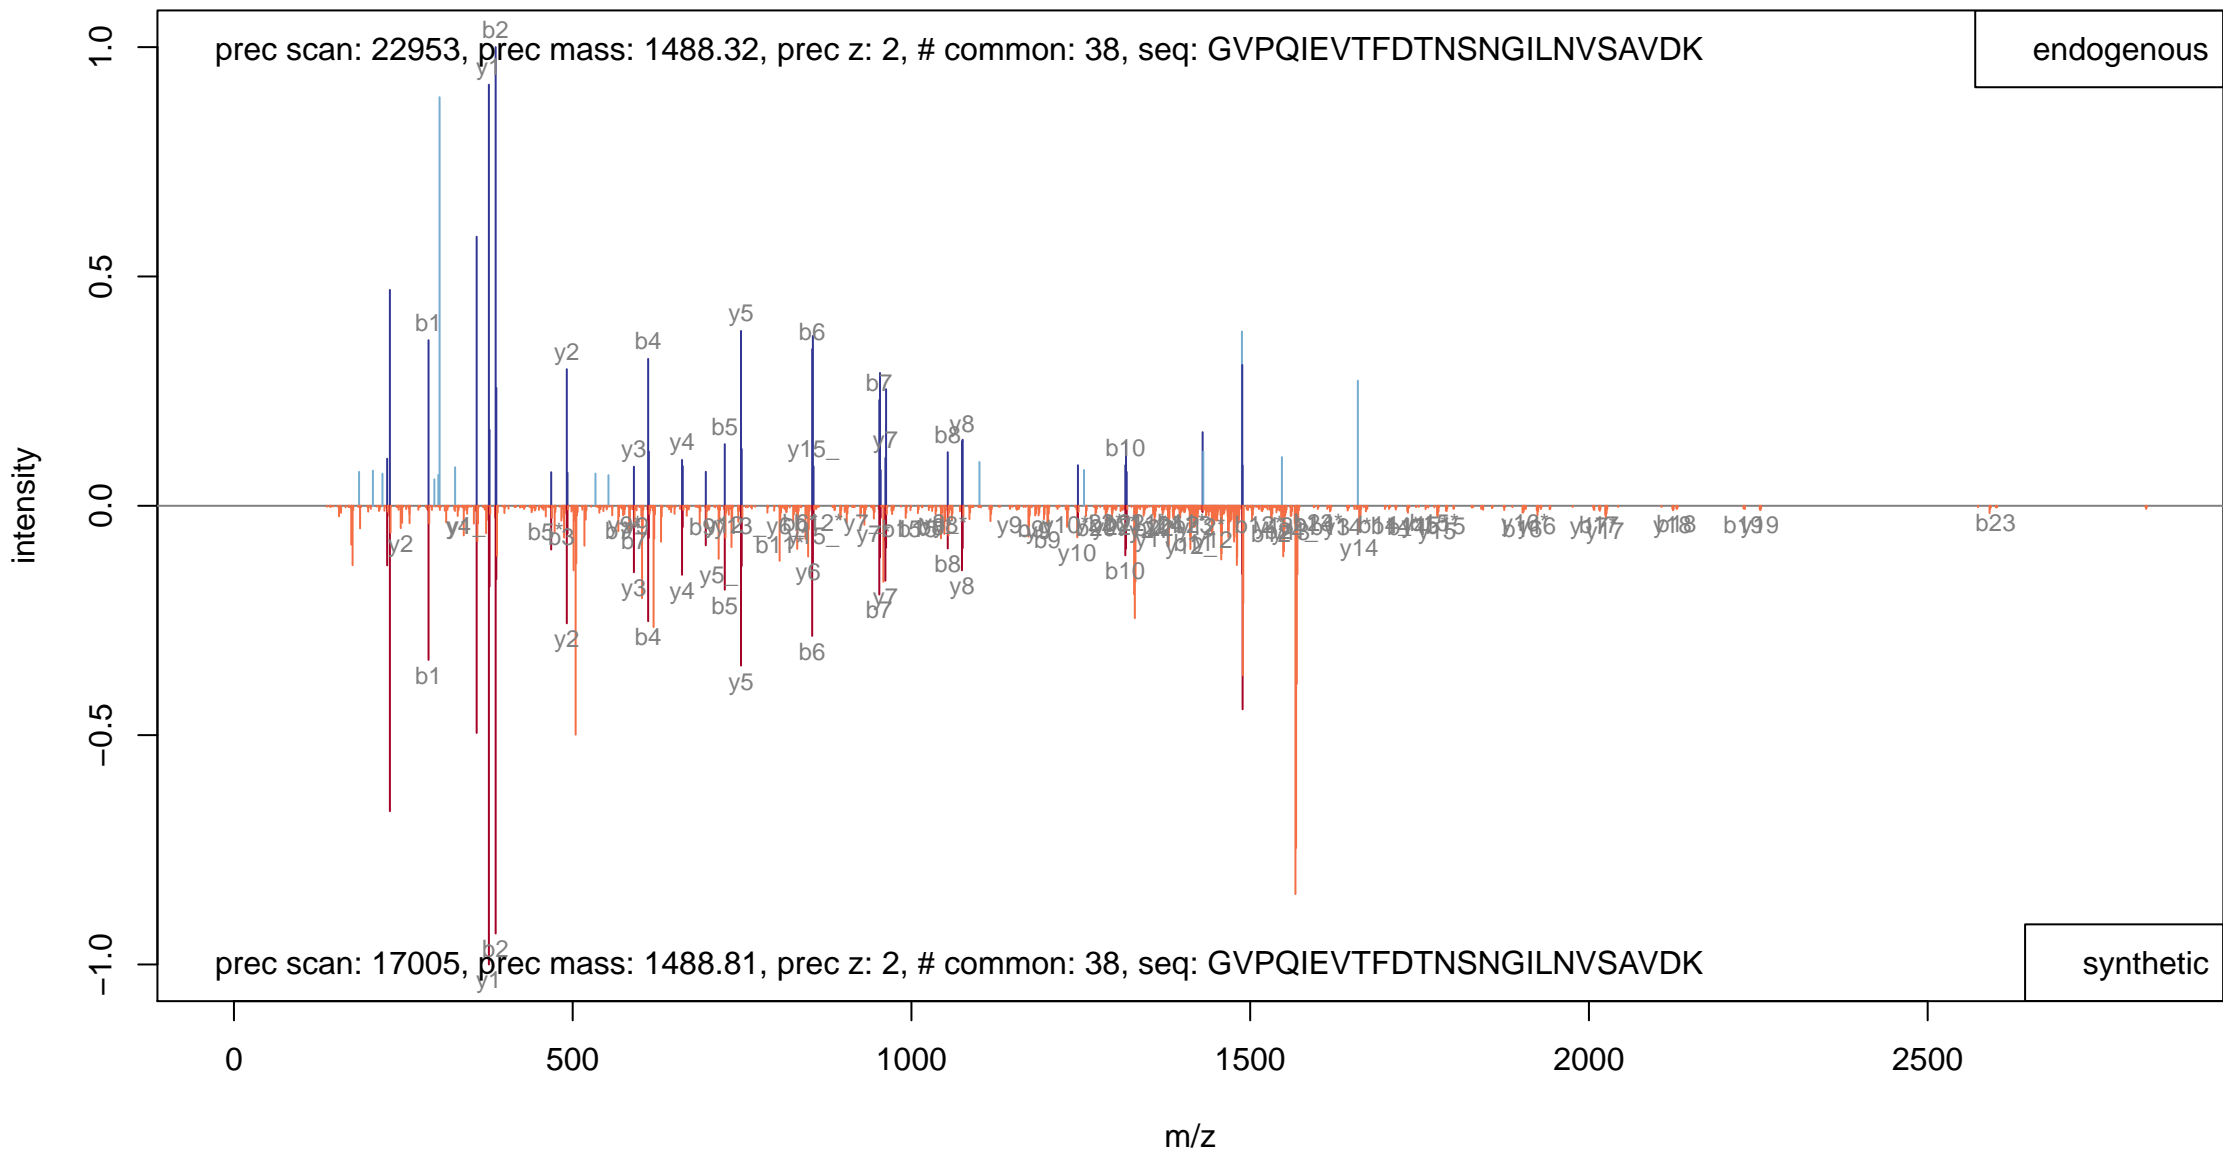



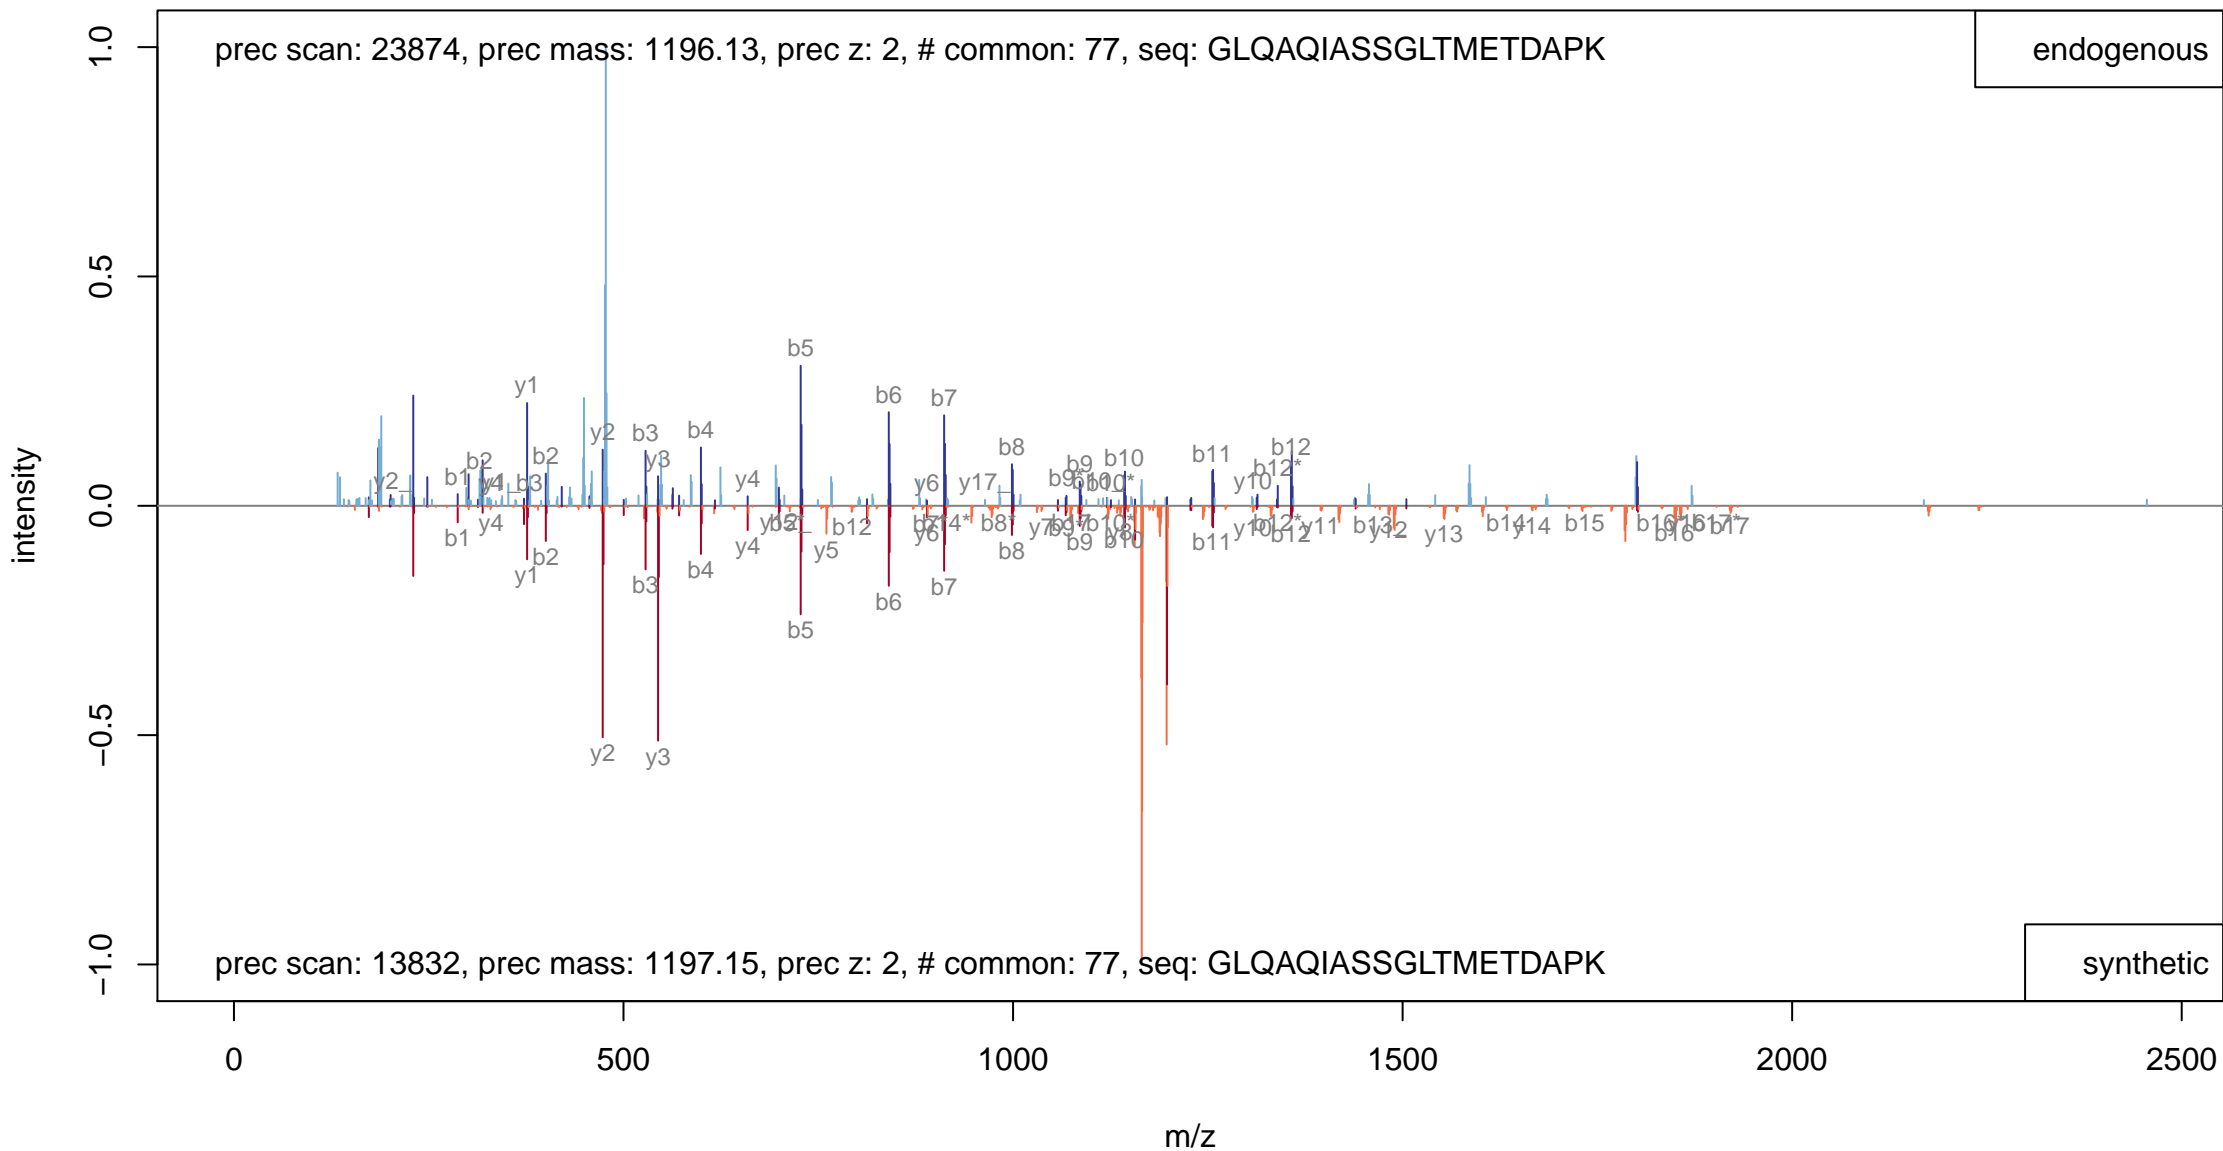



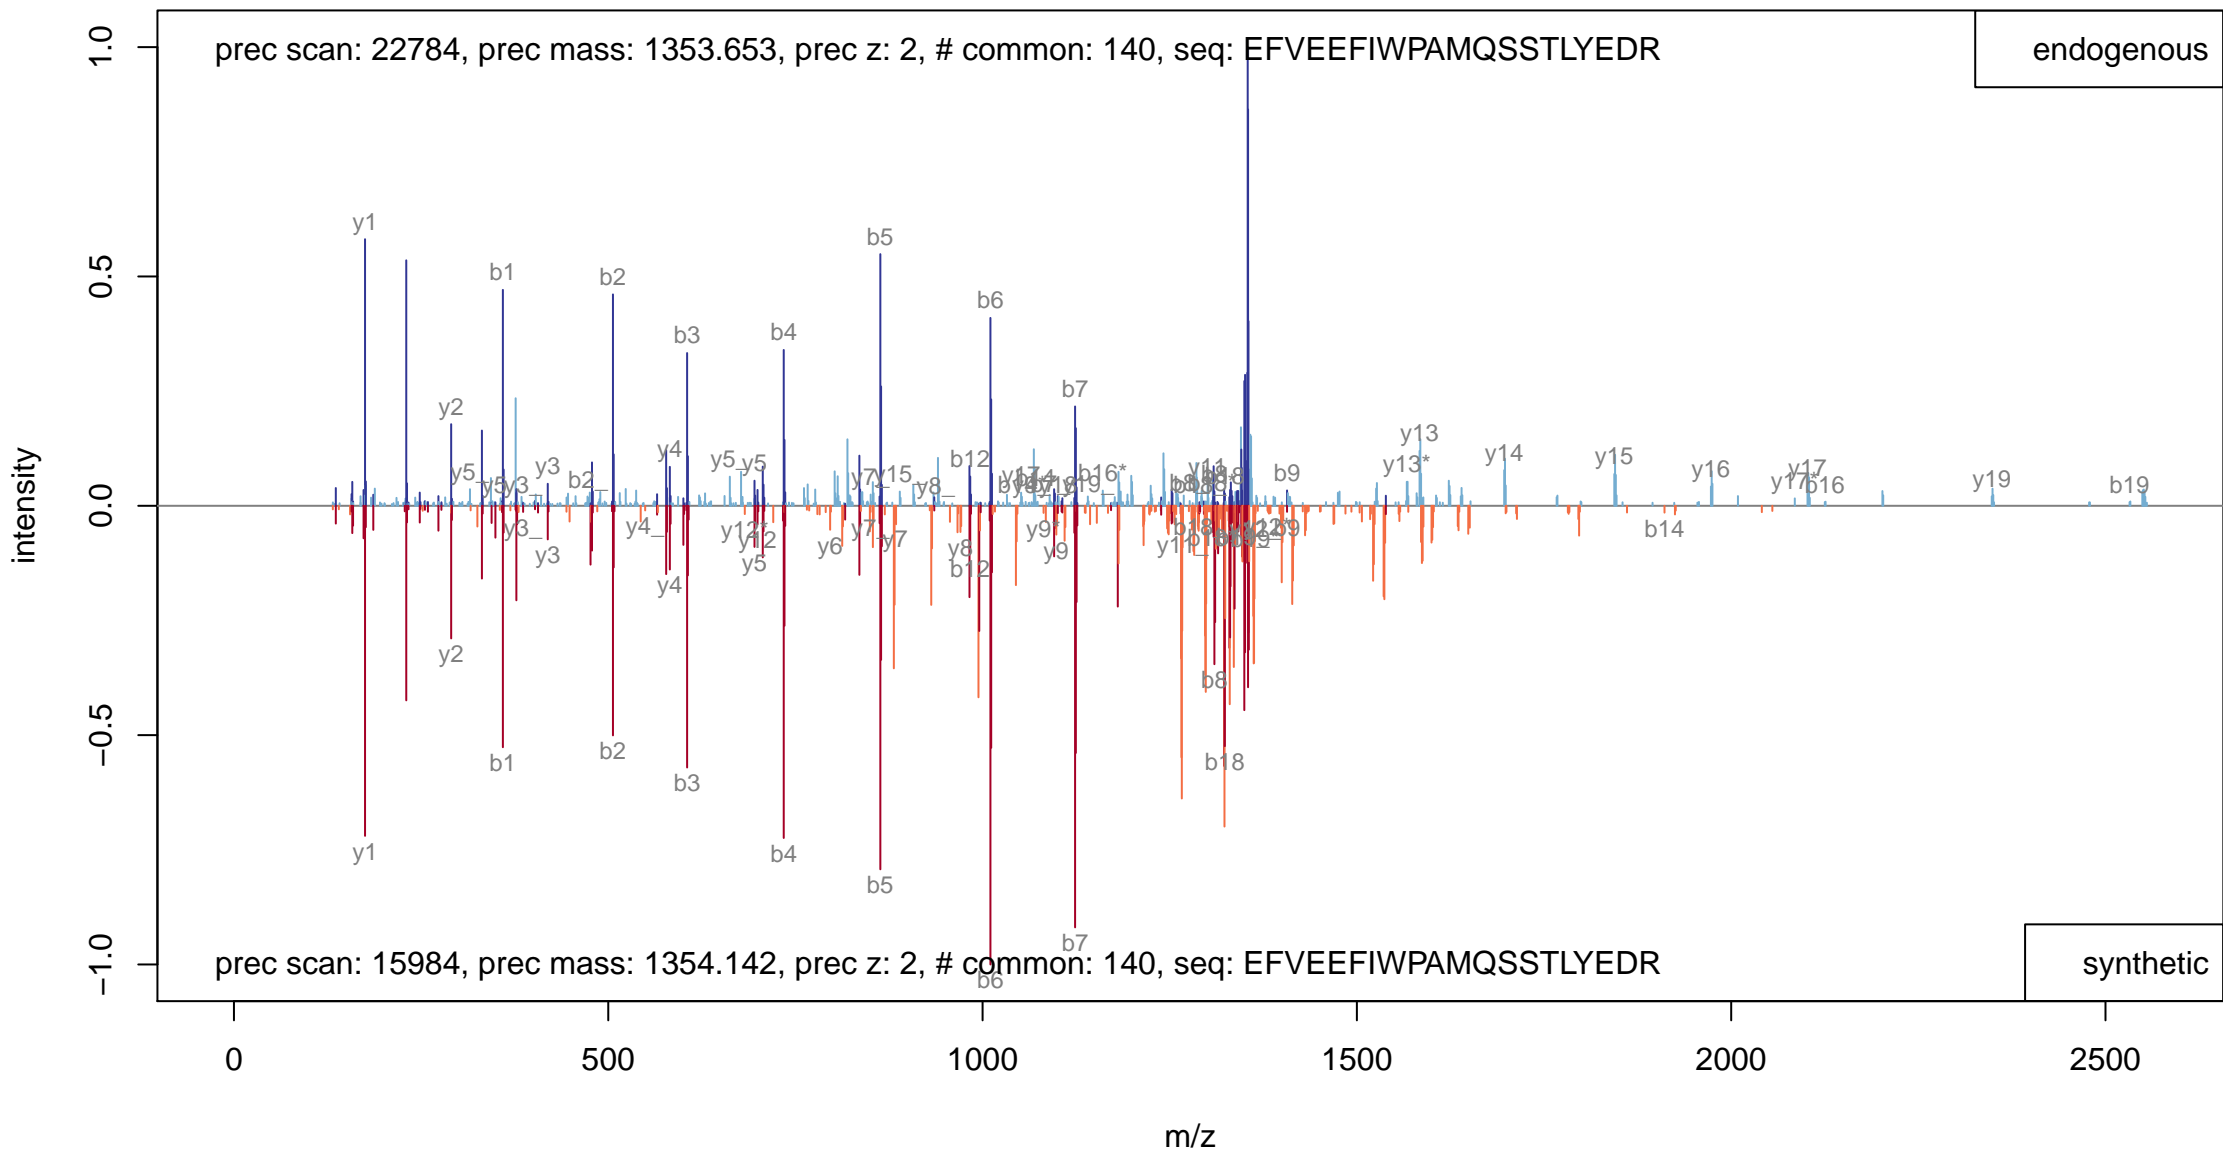



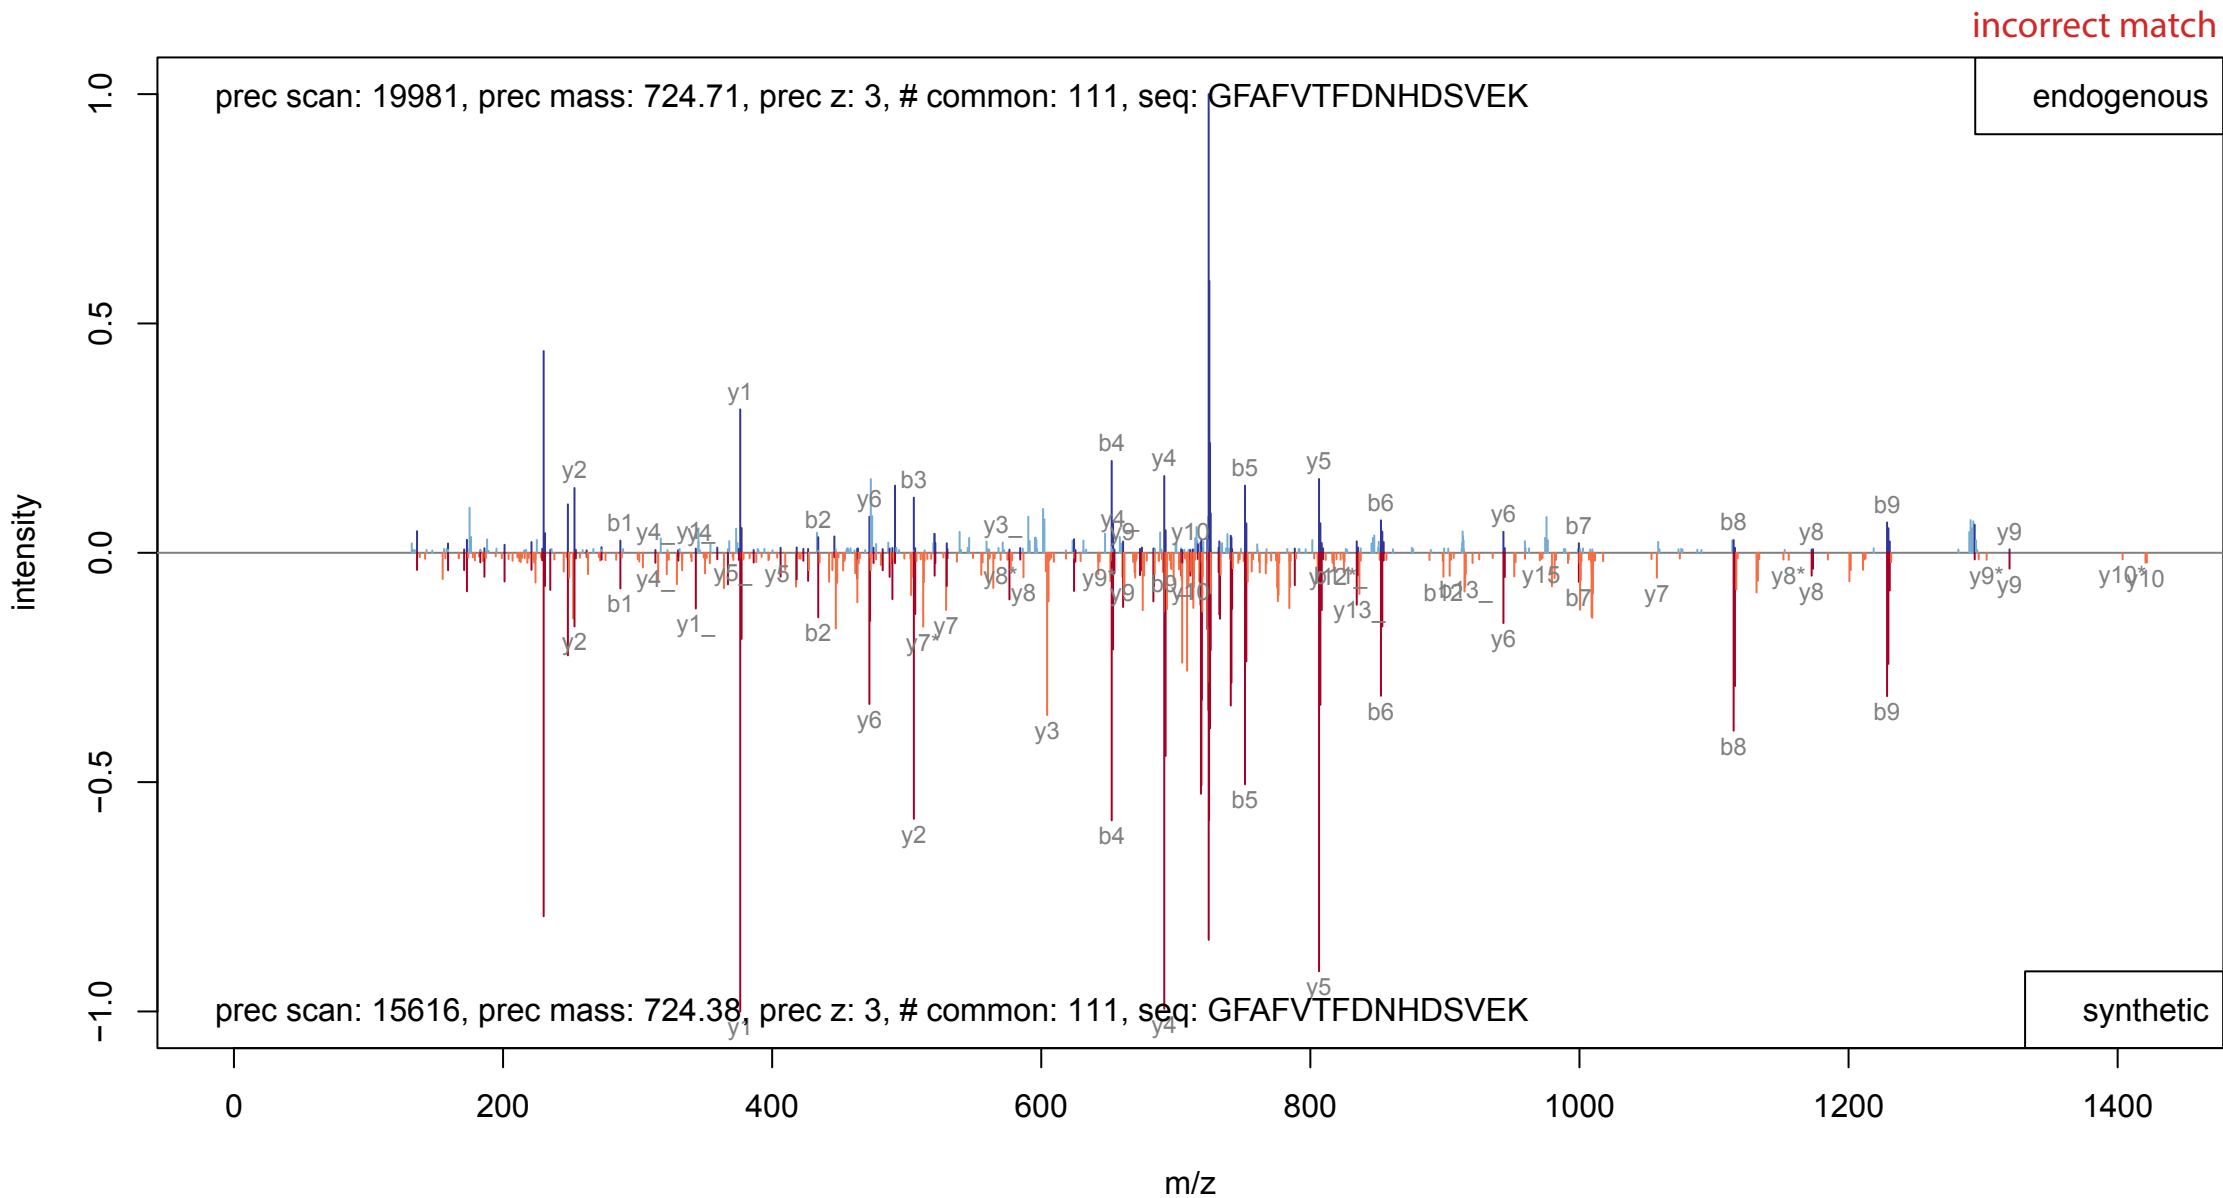

incorrect match

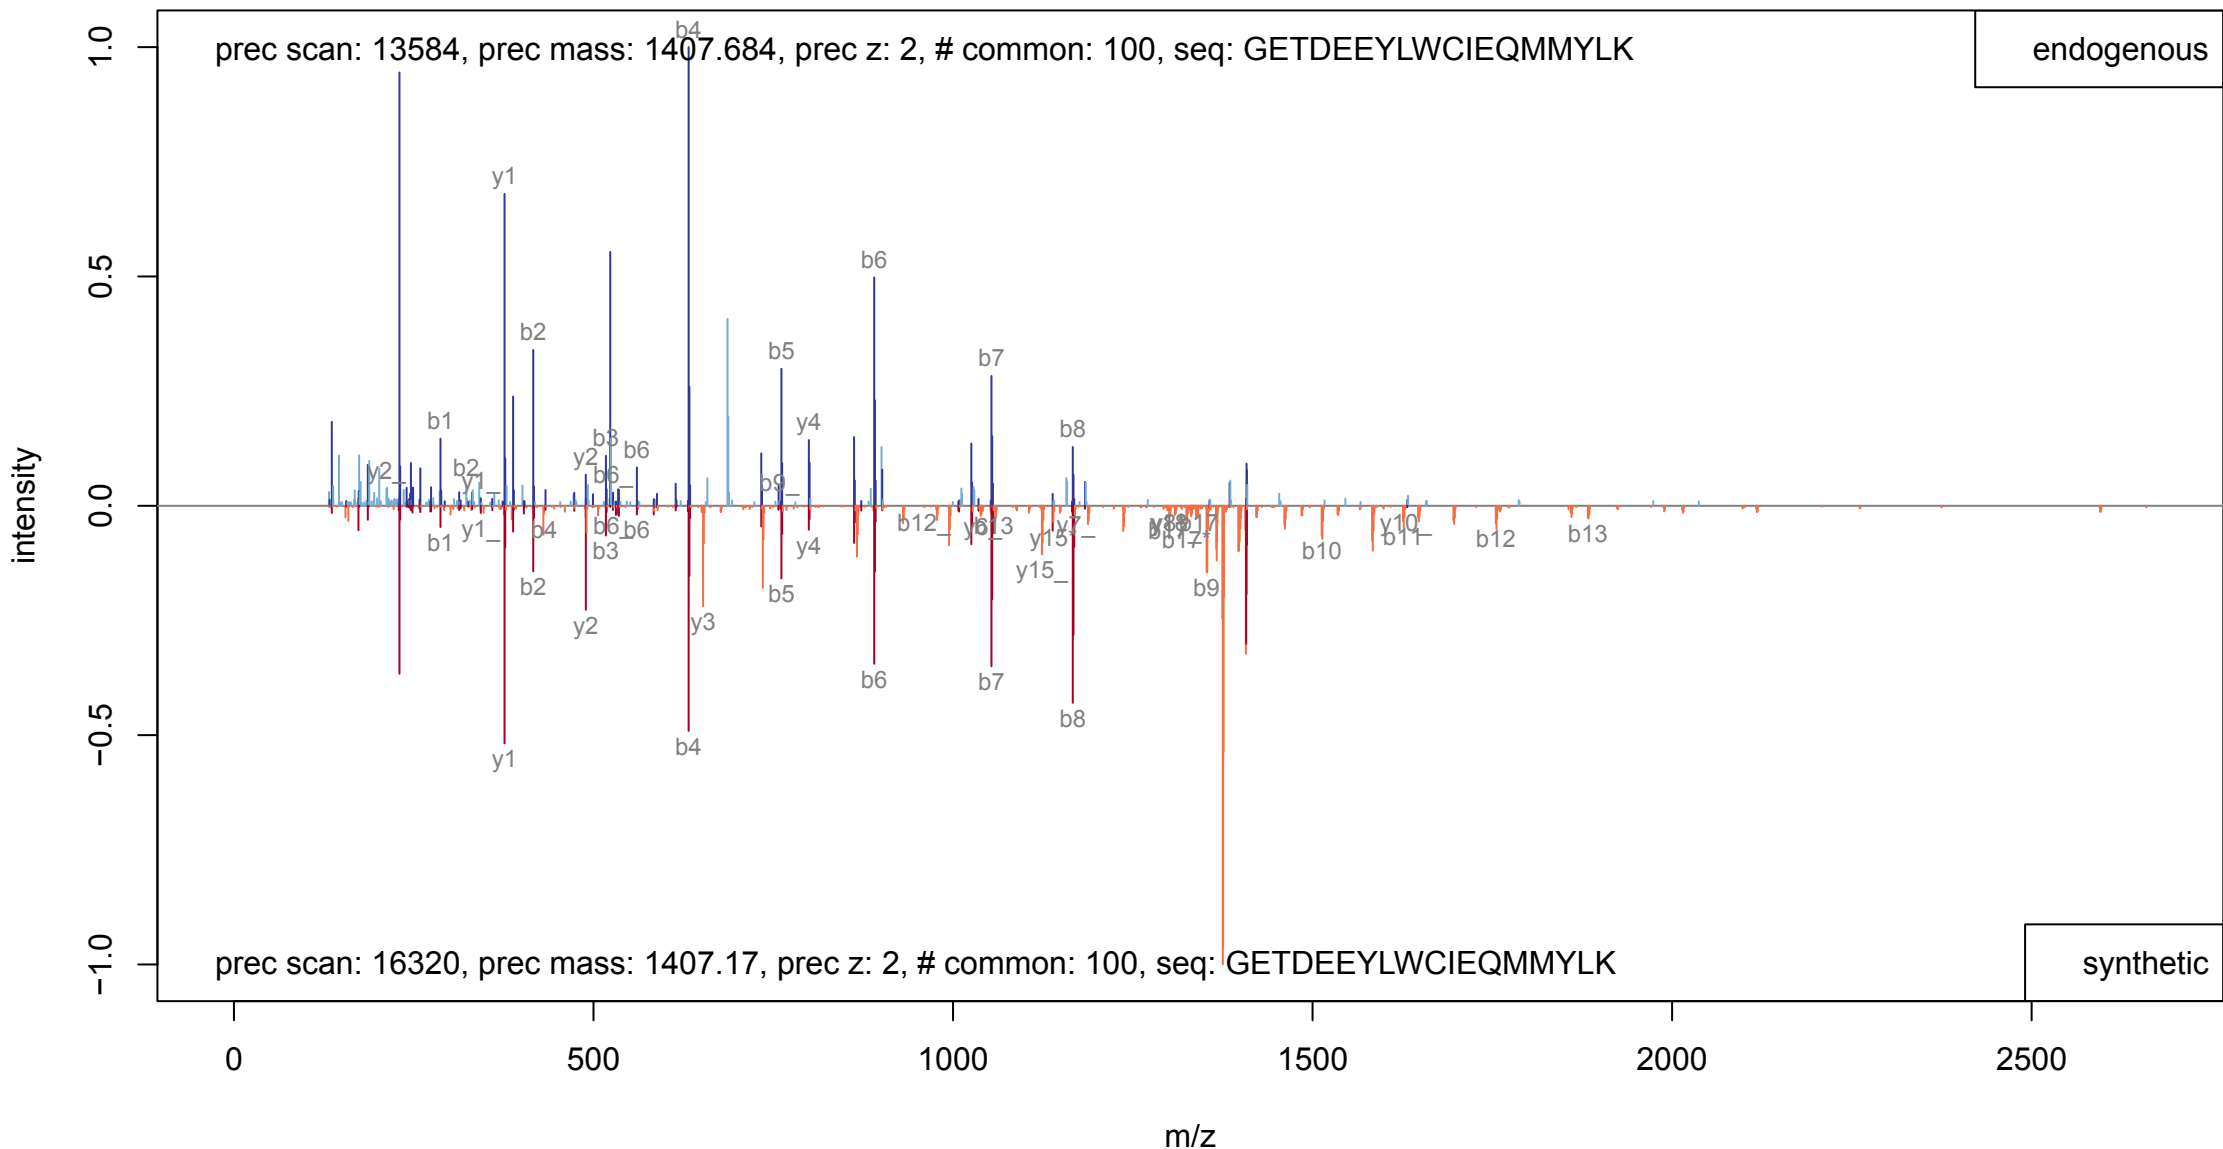

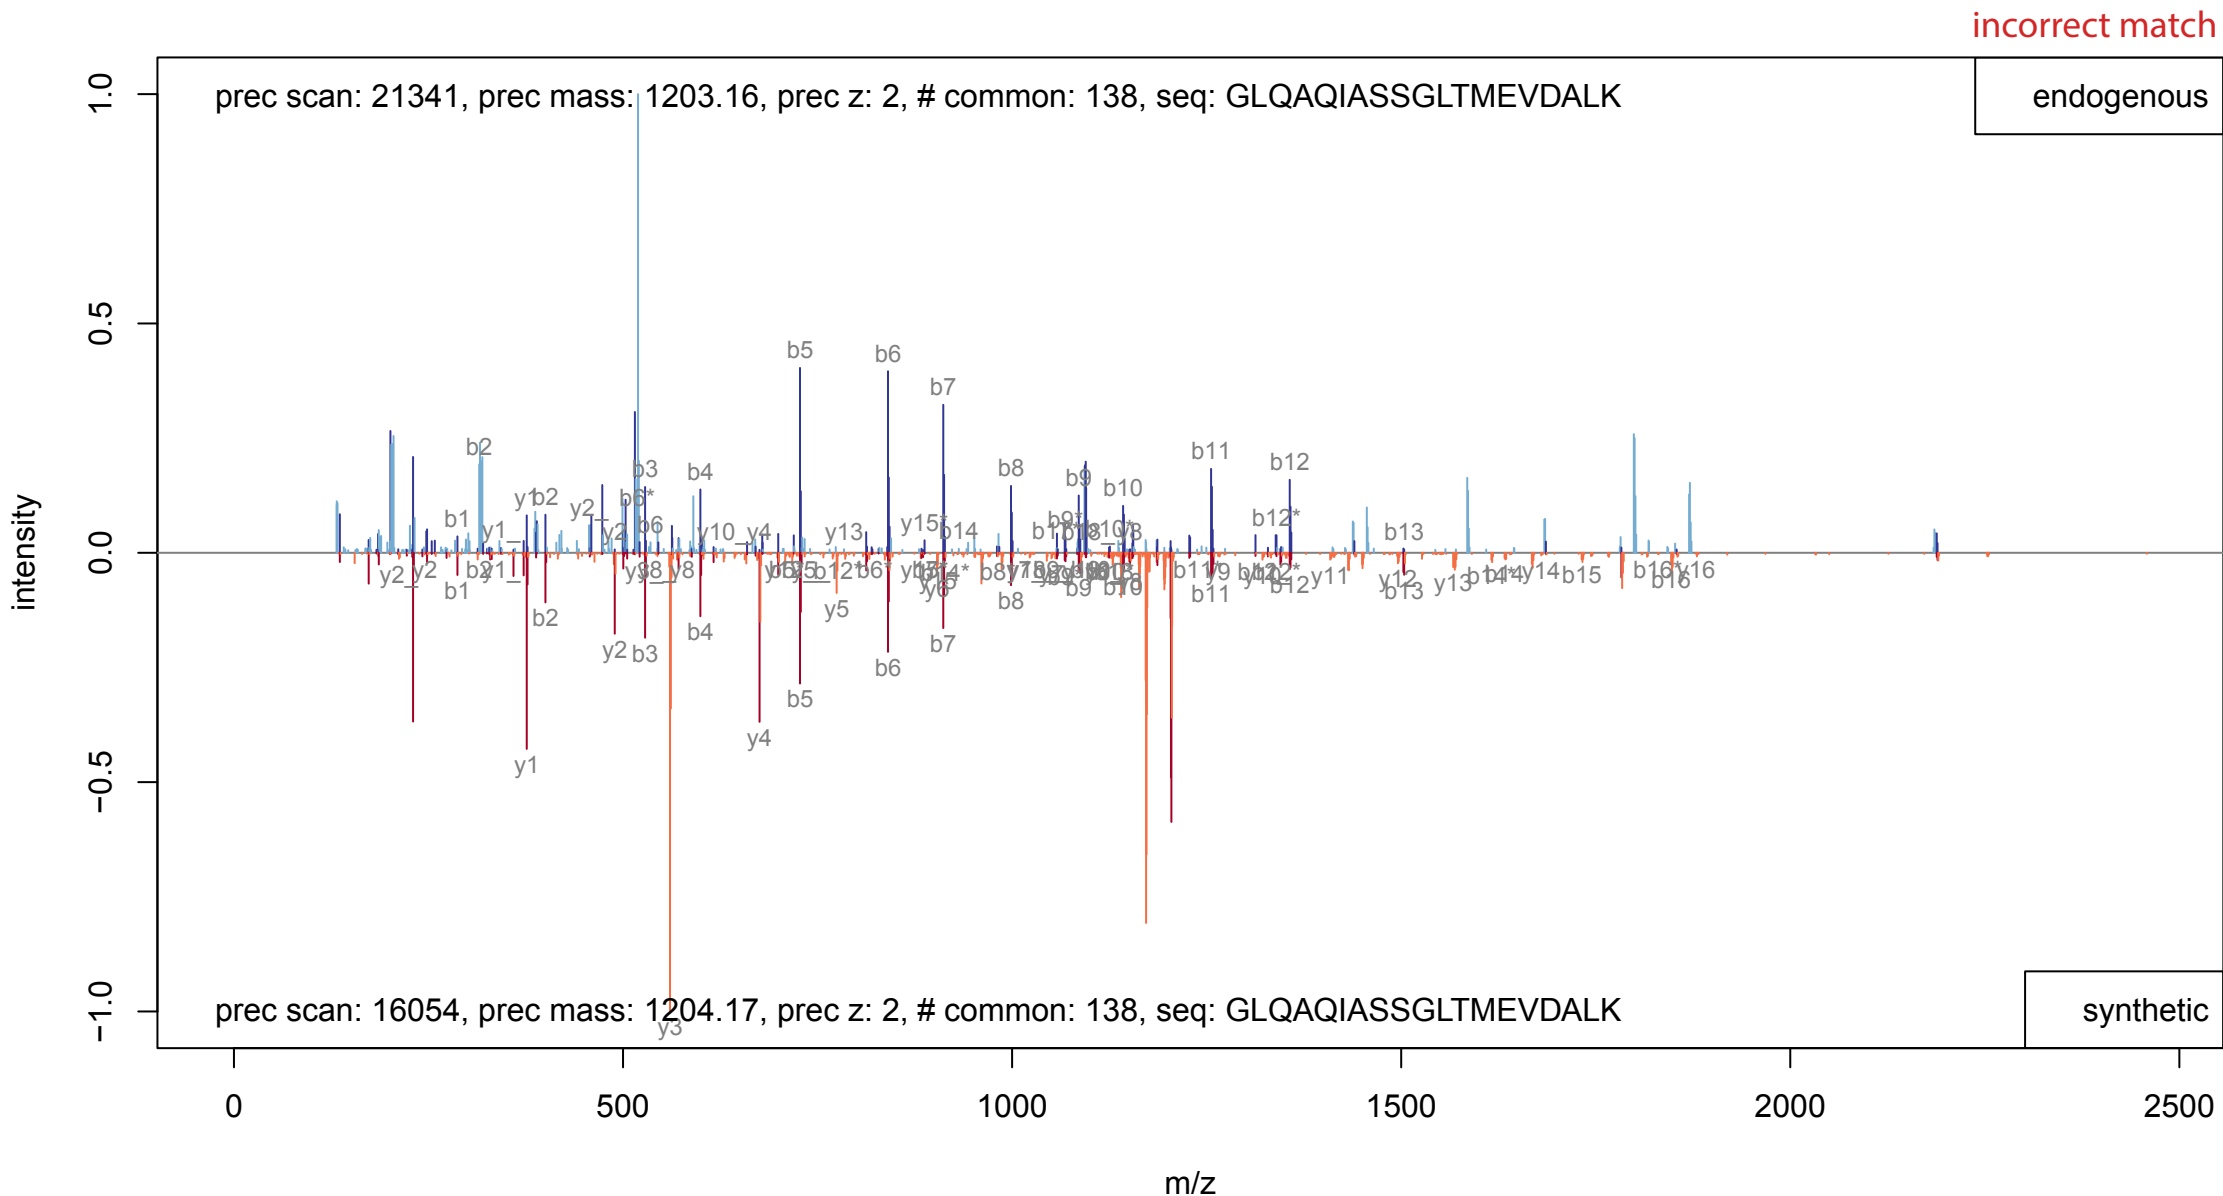

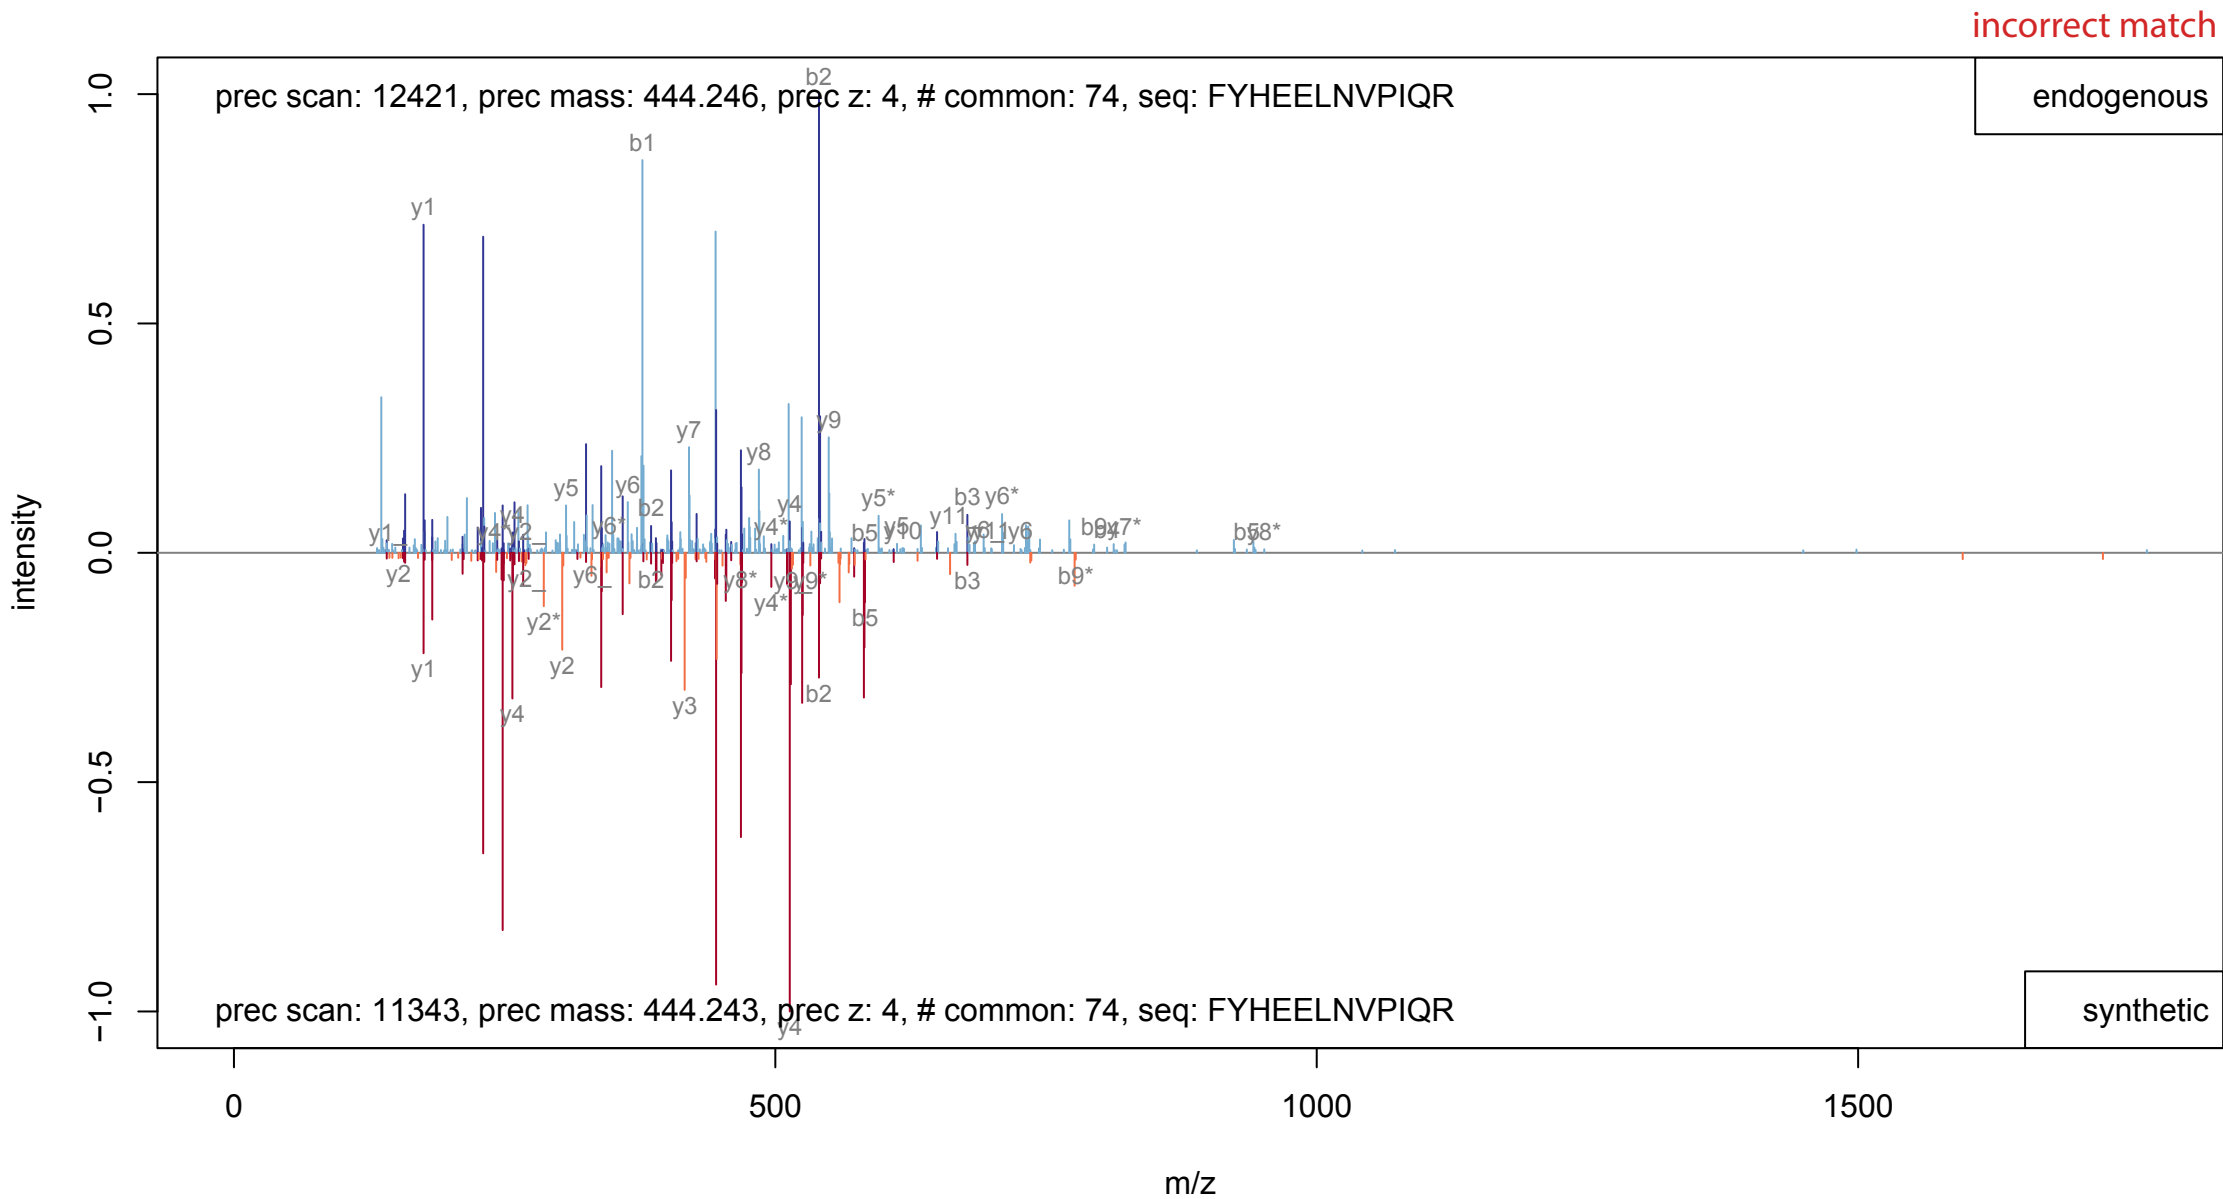

Supplement: 41467_2018_3311_MOESM6_ESM.pdf [file 41467_2018_3311_MOESM6_ESM.pdf]
