# Supplementary material for: Discovery of coding regions in the human genome by integrated proteogenomics analysis workflow
Source: PubMed Central journal article supplement (PMC5834625; doi:10.1038/s41467-018-03311-y), 2018-03-02

### GAPDH

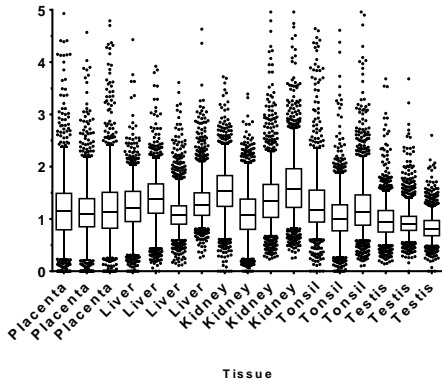

### pseudogene\_GAPDHP63

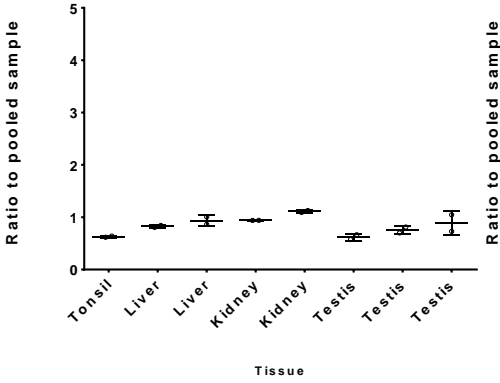

### pseudogene\_GAPDHP71

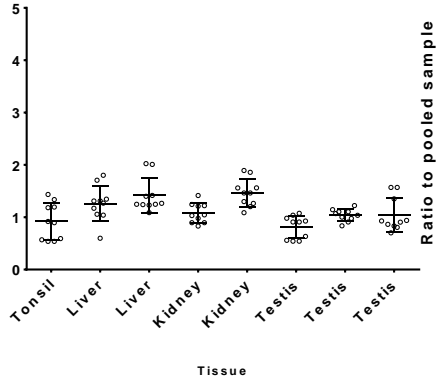

### pseudogene\_GAPDHP23

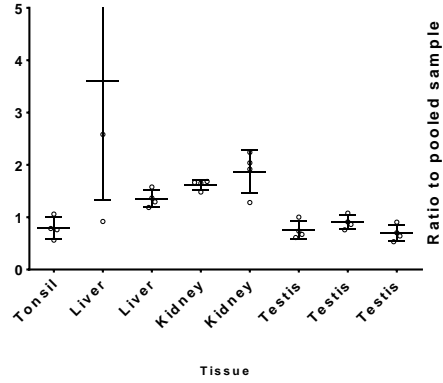

### pseudogene\_GAPDHP66

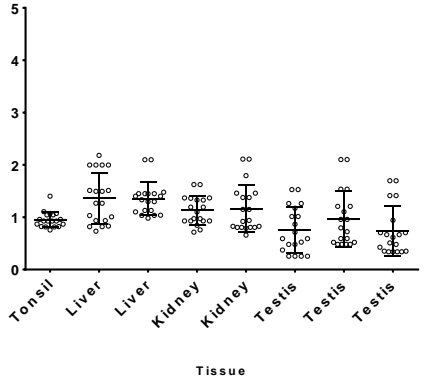

### pseudogene\_GAPDHP63

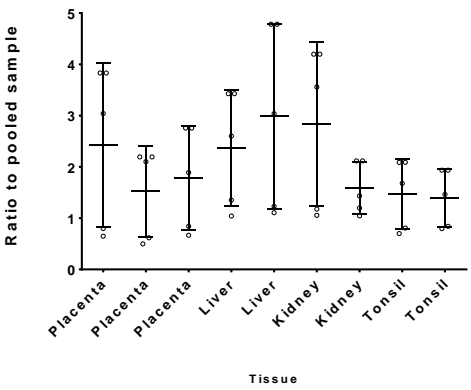

### pseudogene\_GAPDHP71

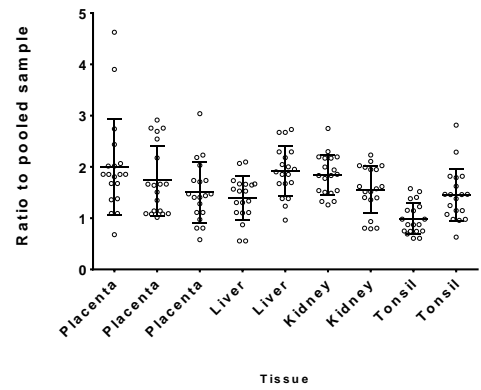

### pseudogene\_GAPDHPx

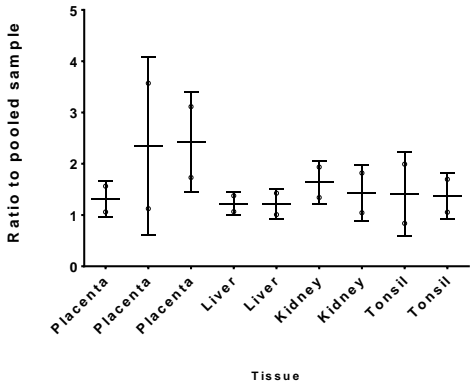

### UBE2L3

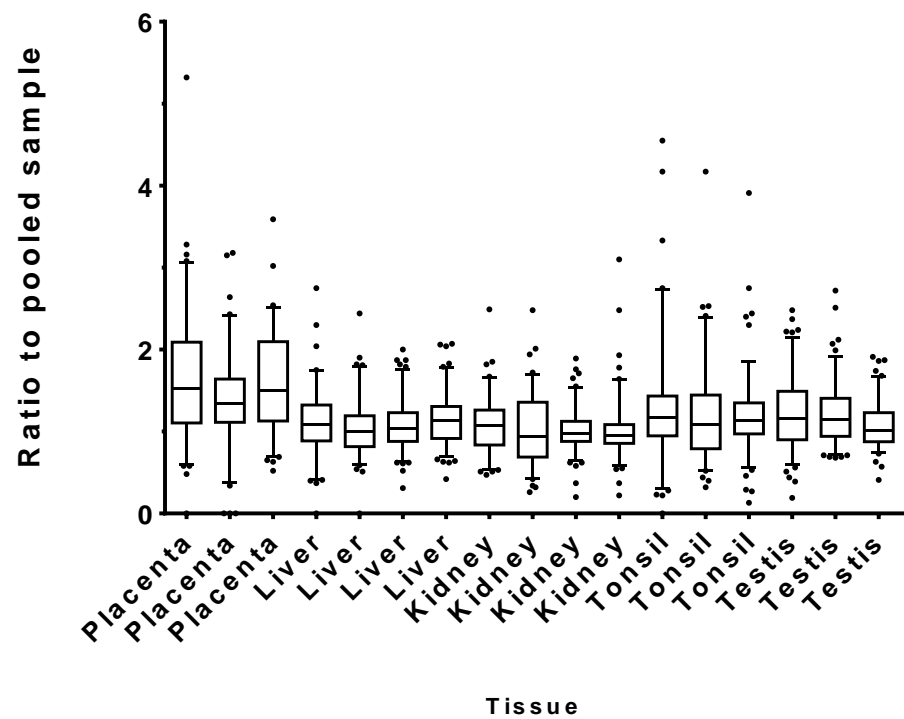

### pseudogene\_UBE2L5P

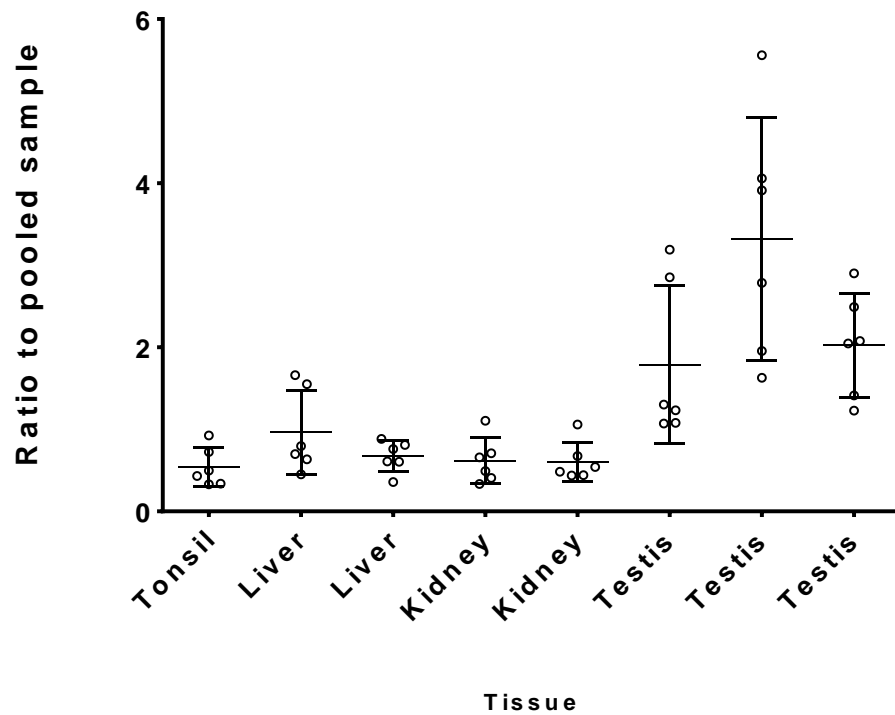

# IncRNA\_TINCR

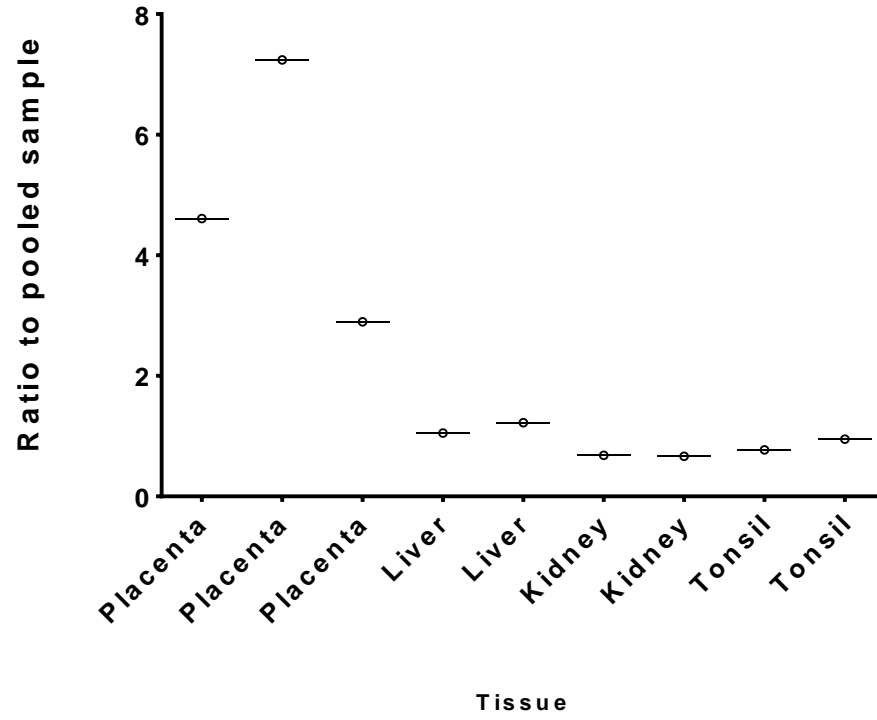

### IncRNA\_CTD-2620122.3

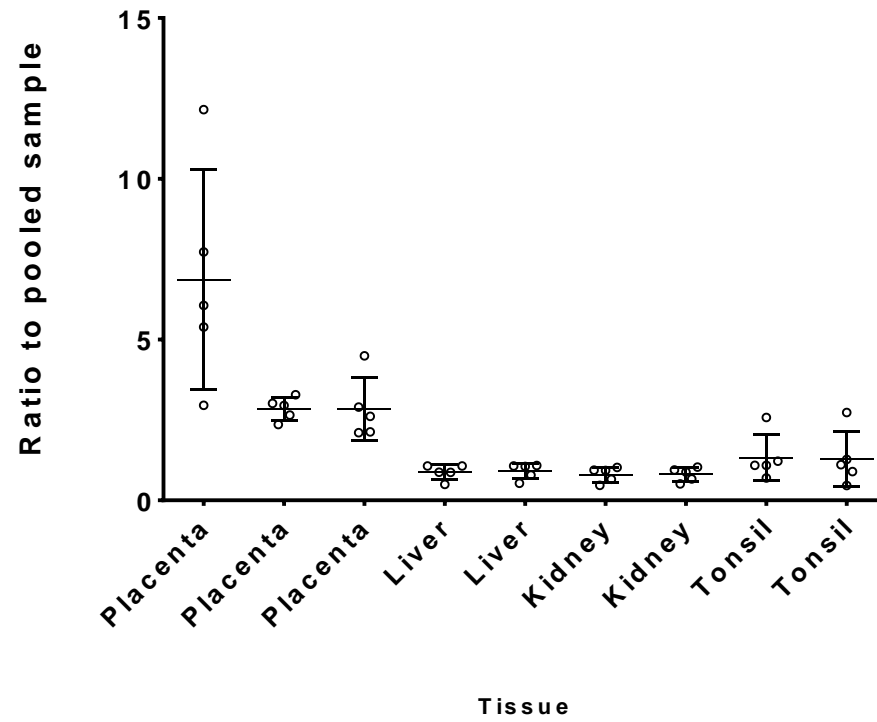

### RBBP4

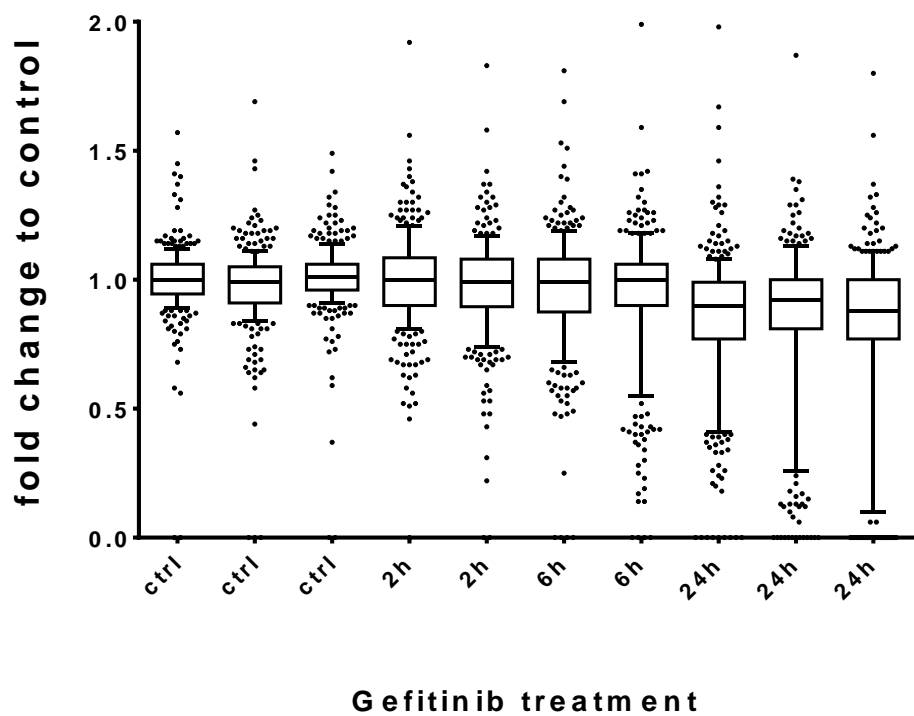

### Pseudogene\_RBBP4P1

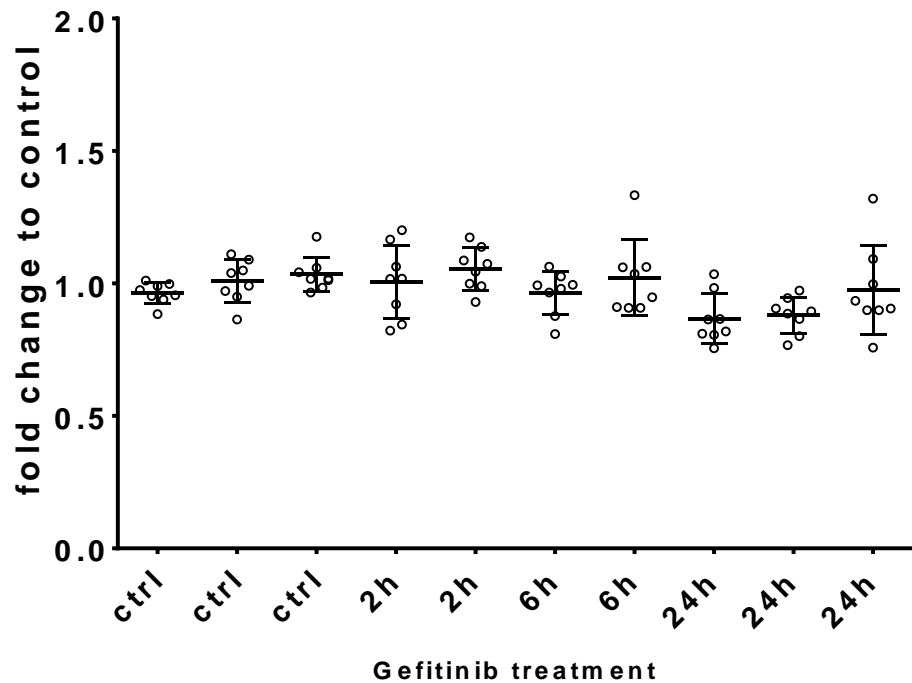

### HSPA8

(without peptides shared with pseudogenes)

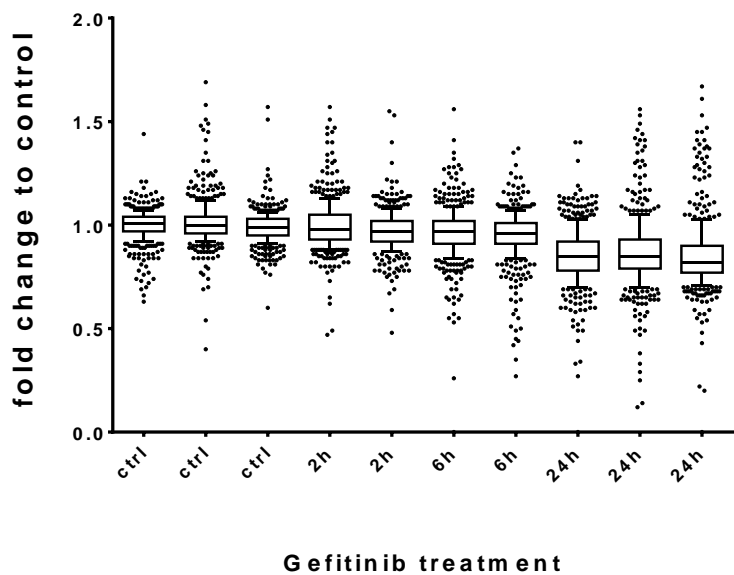

### Pseudogene\_HSPA8P1

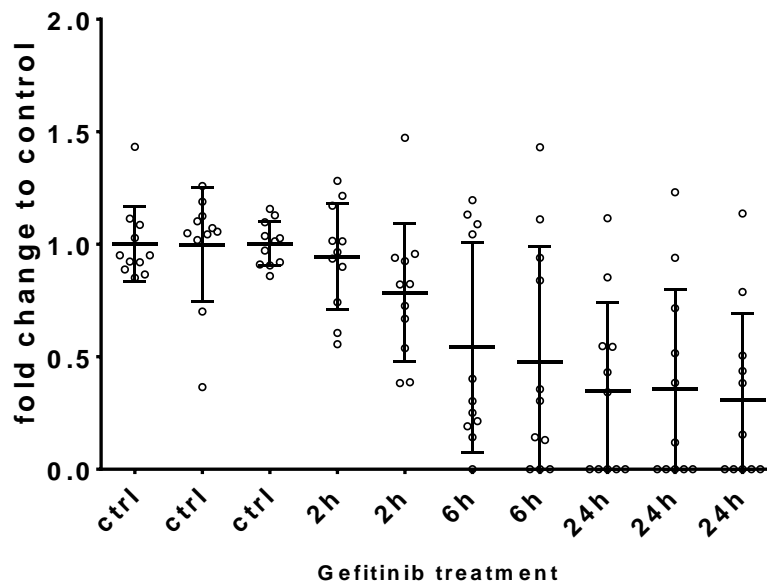

### ANAPC1

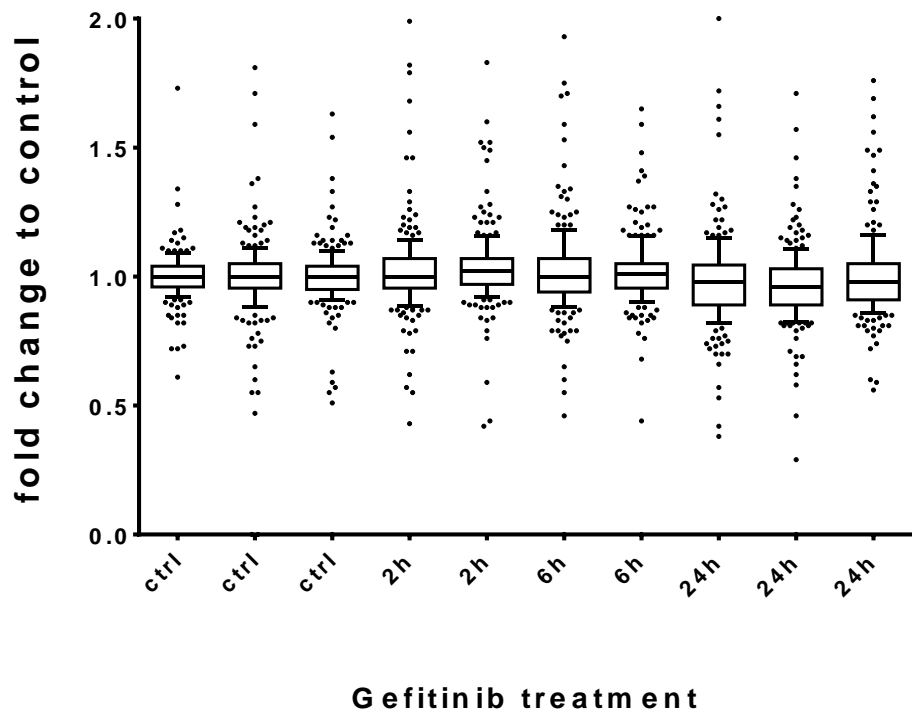

### Pseudogene\_ANAPC1P1

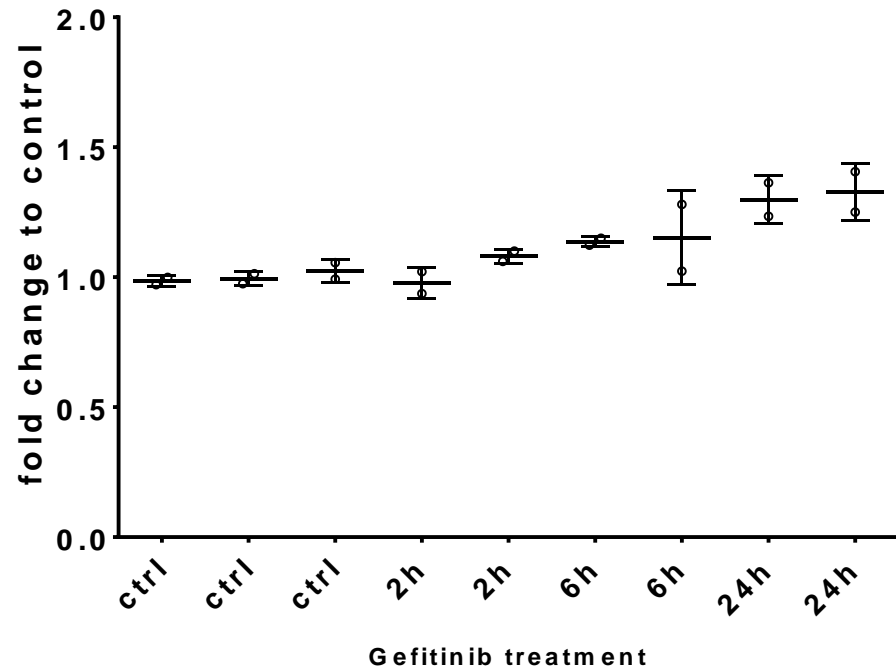

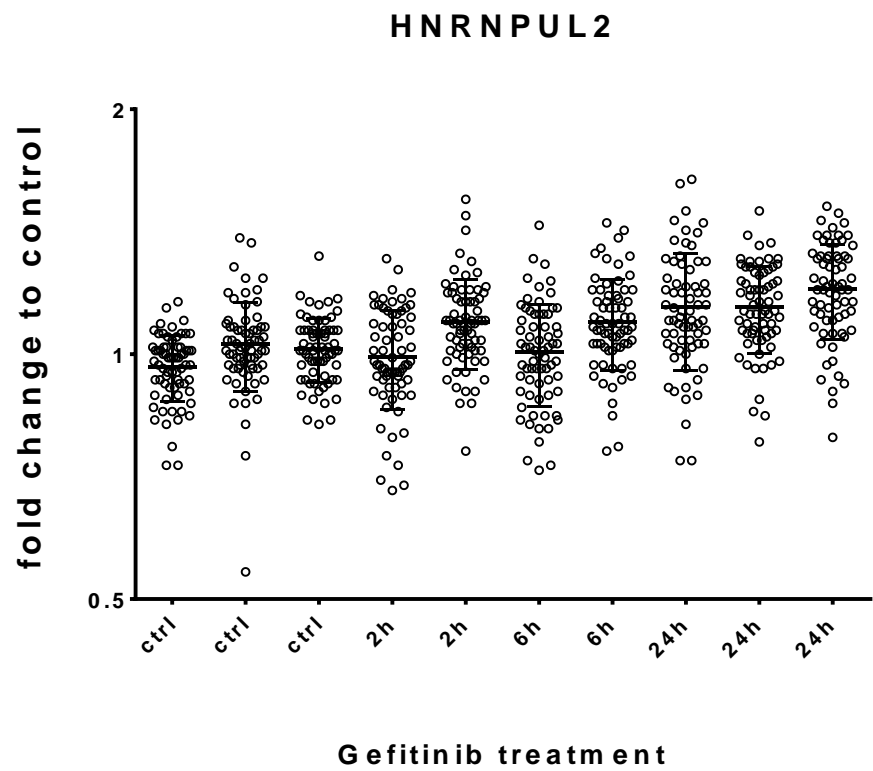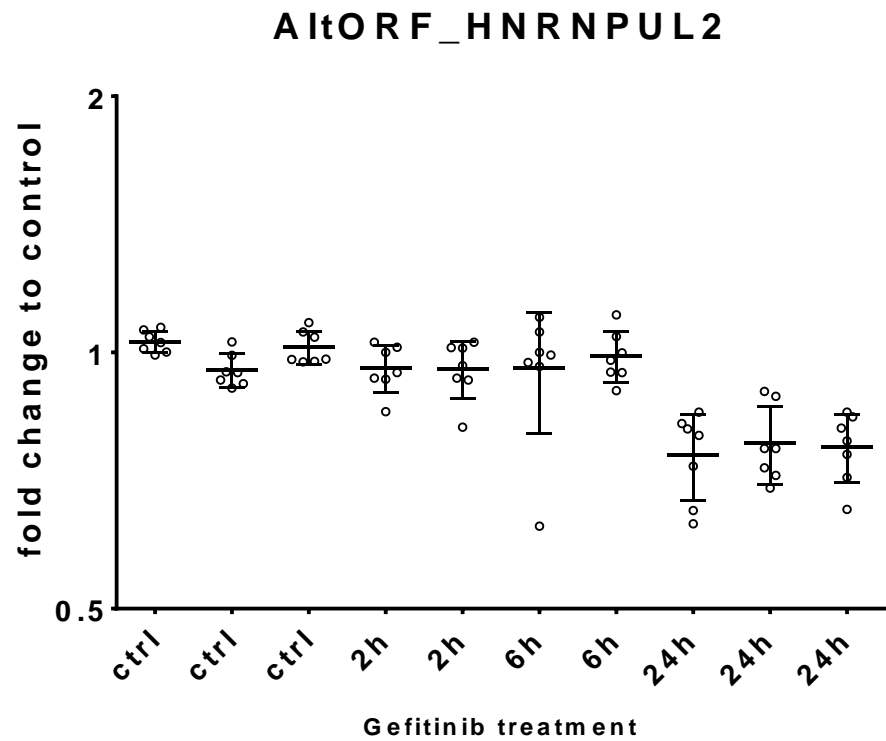



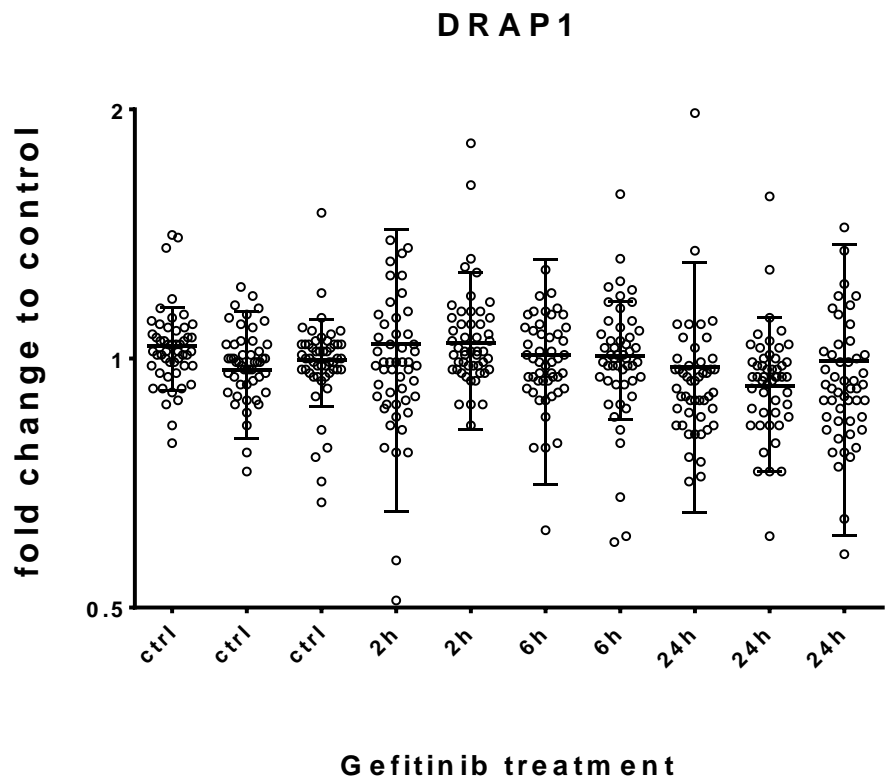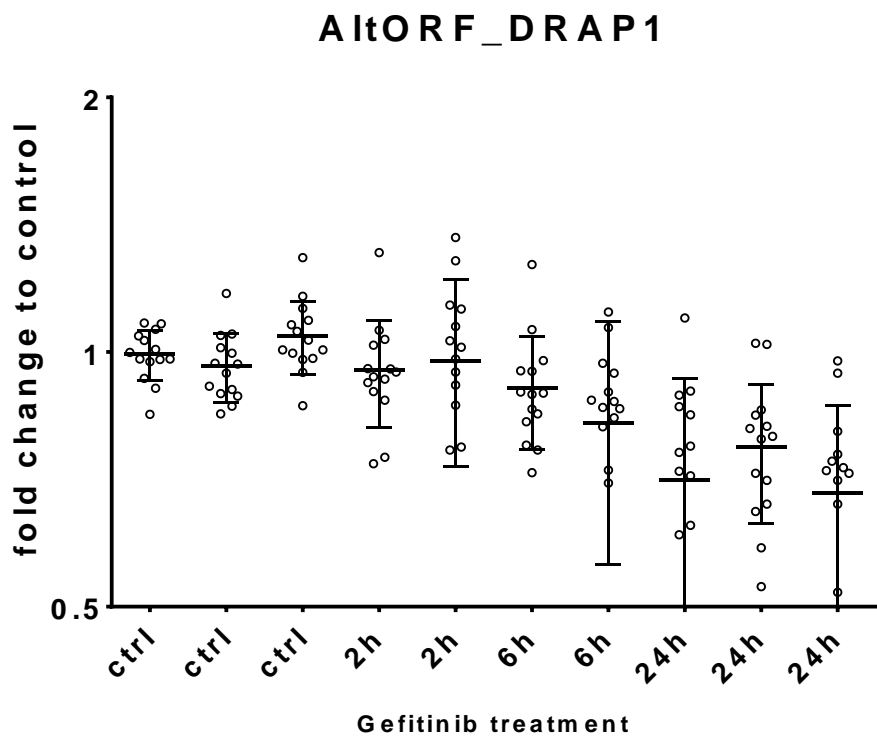

### RAB12

fold change to control

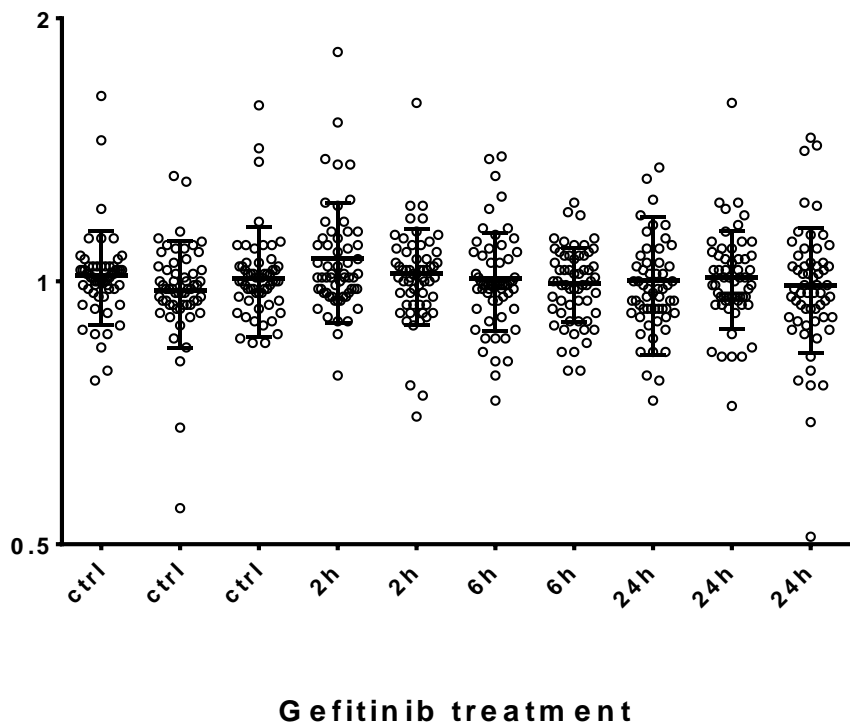

### Nterm-ext\_RAB12

fold change to control

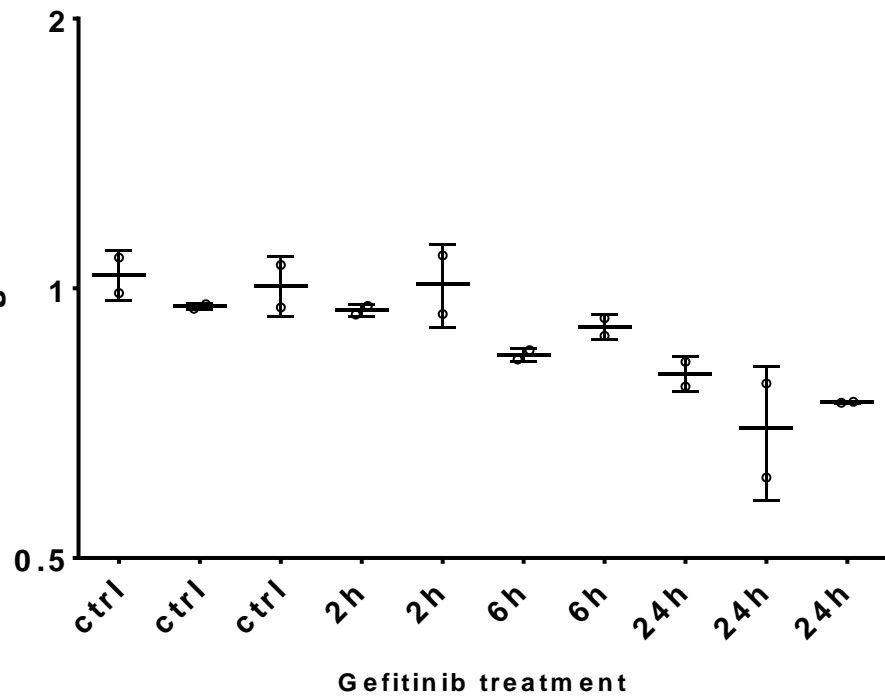

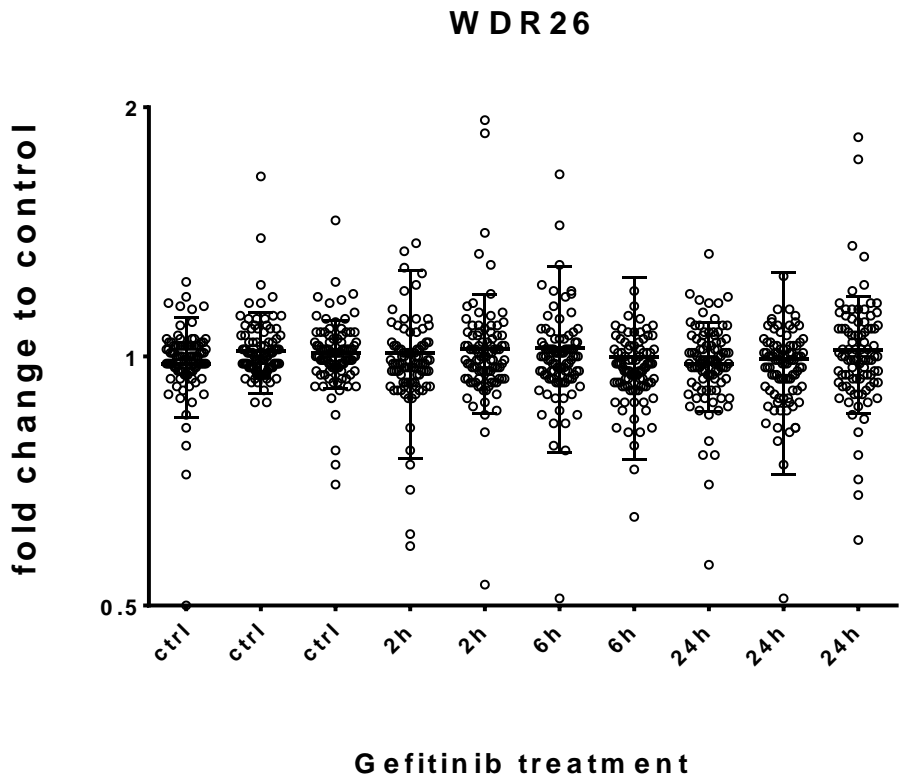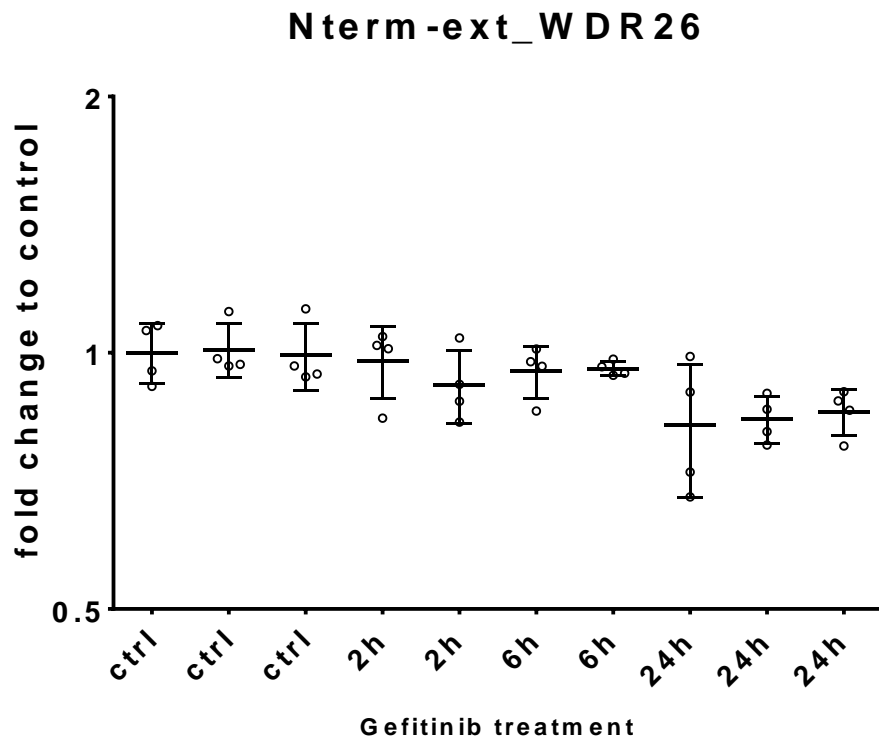

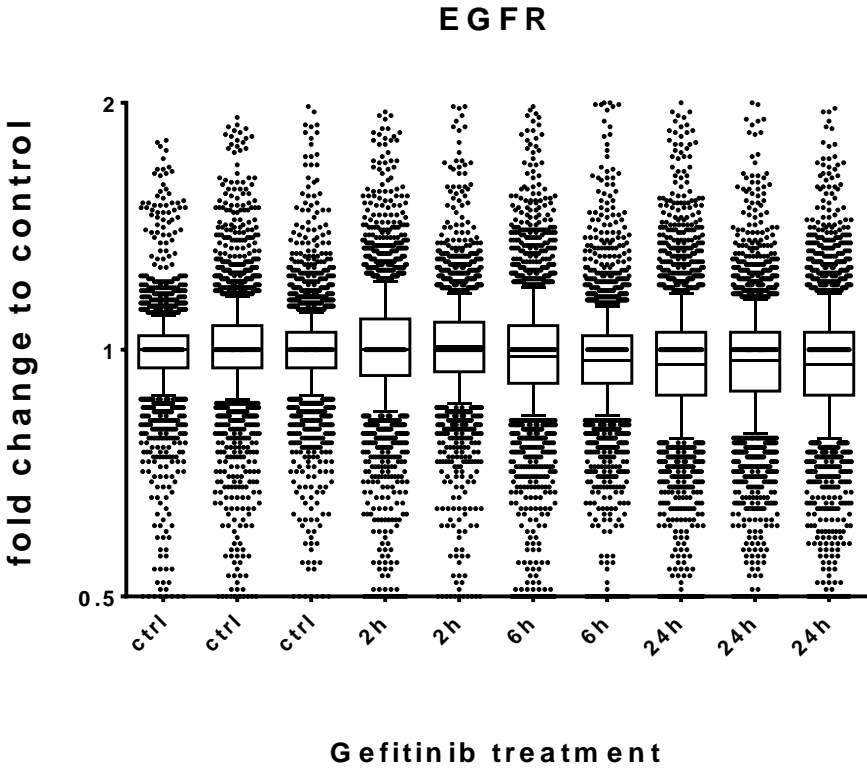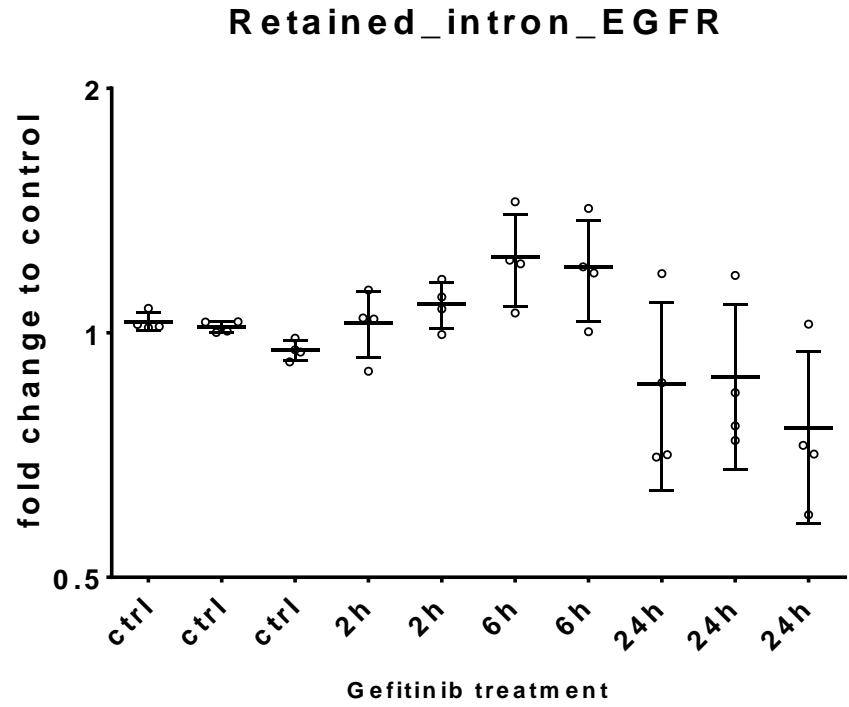

Supplement: 41467_2018_3311_MOESM11_ESM.pdf [file 41467_2018_3311_MOESM11_ESM.pdf]
