# Supplementary material for: Discovery of coding regions in the human genome by integrated proteogenomics analysis workflow
Source: PubMed Central journal article supplement (PMC5834625; doi:10.1038/s41467-018-03311-y), 2018-03-02
Supplement: 41467_2018_3311_MOESM9_ESM.pdf [file 41467_2018_3311_MOESM9_ESM.pdf]

➤ **N-terminally extended CDK16; length=613aa**

MGSAATPRSD RSVPRAAVST RIQAGANESG GIARSGQAHG RLSGTTPPPPQ PTPPPPPPPP QPAAARAQQP WLKTTGTGAC GEQEEKEVAR PHPGPPPQAP  
 PRRPRGSEVA RAPPPIA MDRMKKIKRQ LSMTLRGGRG IDKTNGAPEQ IGLDESGGGG GSDPGEAPTR AAPGELRSAR GPLSSAPEIV HEDLKMGSDG  
 ESDQASATSS DEVQSPVRVR MRNHPPRKIS TEDINKRLSL PADIRLPEGY LEKLTLSNPI FDKPLSRRLR RVSLSEIGFG KLETYIKLDK LGEGTYATVY  
 KGKSKLTDNL VALKEIRLEH EEGAPCTAIR EVSLLKDLKH ANIVTLHDII HTEKSLTLVF EYLDKDLKQY LDDCGNIINM HNVKLFQFLQ LRGLAYCHRQ  
 KVLHRDLKPQ NLLINERGER KLADFGGLARA KSIPTKTYSN EVVTLWYRPP DILLGSTDYS TQIDMWGVGC IFYEMATGRP LFPGSTVEEQ LHFIFRILGT  
 PTEETWPGIL SNEEFKTYNY PKYRAEALLS HAPRLSDGA DLLTKLLQFE GRNRISAEDA MKHPFFLSLG ERIHKLPDPT SIFALKEIQL QKEASLRSSS  
 MPDSGRPAFR VVDTEF

### targetp v1.1 prediction results #####  
 Number of query sequences: 1  
 Cleavage site predictions included.  
 Using NON-PLANT networks.

| Name     | Len | mTP   | SP    | other | Loc | RC | TPlen |
|----------|-----|-------|-------|-------|-----|----|-------|
| Sequence | 40  | 0.756 | 0.028 | 0.316 | M   | 3  | 24    |
| cutoff   |     | 0.000 | 0.000 | 0.000 |     |    |       |

➤ **Canonical CDK16 (ENST00000357227.4); length=496aa**

MDRMKKIKRQ LSMTLRGGRG IDKTNGAPEQ IGLDESGGGG GSDPGEAPTR AAPGELRSAR GPLSSAPEIV HEDLKMGSDG ESDQASATSS DEVQSPVRVR  
 MRNHPPRKIS TEDINKRLSL PADIRLPEGY LEKLTLSNPI FDKPLSRRLR RVSLSEIGFG KLETYIKLDK LGEGTYATVY KGKSKLTDNL VALKEIRLEH  
 EEGAPCTAIR EVSLLKDLKH ANIVTLHDII HTEKSLTLVF EYLDKDLKQY LDDCGNIINM HNVKLFQFLQ LRGLAYCHRQ KVLHRDLKPQ NLLINERGER  
 KLADFGGLARA KSIPTKTYSN EVVTLWYRPP DILLGSTDYS TQIDMWGVGC IFYEMATGRP LFPGSTVEEQ LHFIFRILGT PTEETWPGIL SNEEFKTYNY  
 PKYRAEALLS HAPRLSDGA DLLTKLLQFE GRNRISAEDA MKHPFFLSLG ERIHKLPDPT SIFALKEIQL QKEASLRSSS MPDSGRPAFR VVDTEF

### targetp v1.1 prediction results #####  
 Number of query sequences: 1  
 Cleavage site predictions included.  
 Using NON-PLANT networks.

| Name     | Len | mTP   | SP    | other | Loc | RC | TPlen |
|----------|-----|-------|-------|-------|-----|----|-------|
| Sequence | 40  | 0.235 | 0.047 | 0.802 | _   | 3  | -     |
| cutoff   |     | 0.000 | 0.000 | 0.000 |     |    |       |

➤ **N-terminally extended NPLOC4; length=651aa**

LERRWRRRE AGAGAEAAAG SARPLGRQAA AARGSSPEAG AAA MAESIIIRVQ SPDGVKRITA TKRETAATFL KKVAKFEGFQ NNGFSVYINR NKTGEITASS  
 NKSLNLLKIK HGDLLFLFPS SLAGPSSEME TSVPPGFKVF GAPNVVEDEI DQYLSKQDGK IYRSRDPQLC RHGPLGKCVH CVPLEPFDED YLNHLEPPVK  
 HMSFHAYIRK LTGGADKGF VALENISCKI KSGCEGHLPW PNGICTKCQP SAITLNRQKY RHVDNIMFEN HTVADRFLDF WRKTGNQHFG YLYGRYTEHK  
 DIPLGIRAEV AAIYEPPQIG TQNSLELLED PKAEVVDEIA AKLGLRKVGW IFTDLVSED T RKGTVRYSRN KDTYFLSSEE CITAGDFQNK HPNMCRLSPD  
 GHFGSKFVTA VATGGPDNQV HFEGYQVSNQ CMALVRDECL LPCKDAPELG YAKESSEQY VPDVFKDVD KFGNEITQLA RPLPVEYLII DITTFPKDP  
 VYTFSISQNP FPIENRDVLG ETQDFHSLAT YLSQNTSSVF LDTISDFHLL LFLVTNEVMP LQDSISLLE AVRTRNEELA QTWKRSEQWA TIEQLCSTVG  
 GQLPGLHEYG AVGGSTHTAT AAMWACQHCT FMNQPGTGHC EMCSLPRT

### targetp v1.1 prediction results #####  
 Number of query sequences: 1  
 Cleavage site predictions included.  
 Using NON-PLANT networks.

| Name     | Len | mTP   | SP    | other | Loc | RC | TPlen |
|----------|-----|-------|-------|-------|-----|----|-------|
| Sequence | 43  | 0.879 | 0.023 | 0.176 | M   | 2  | 34    |
| cutoff   |     | 0.000 | 0.000 | 0.000 |     |    |       |

➤ **Canonical NPLOC4; length=608aa**

MAESIIIRVQ SPDGVKRITA TKRETAATFL KKVAKFEGFQ NNGFSVYINR NKTGEITASS NKSLNLLKIK HGDLLFLFPS SLAGPSSEME TSVPPGFKVF  
 GAPNVVEDEI DQYLSKQDGK IYRSRDPQLC RHGPLGKCVH CVPLEPFDED YLNHLEPPVK HMSFHAYIRK LTGGADKGF VALENISCKI KSGCEGHLPW  
 PNGICTKCQP SAITLNRQKY RHVDNIMFEN HTVADRFLDF WRKTGNQHFG YLYGRYTEHK DIPLGIRAEV AAIYEPPQIG TQNSLELLED PKAEVVDEIA  
 AKLGLRKVGW IFTDLVSED T RKGTVRYSRN KDTYFLSSEE CITAGDFQNK HPNMCRLSPD GHFGSKFVTA VATGGPDNQV HFEGYQVSNQ CMALVRDECL  
 LPCKDAPELG YAKESSEQY VPDVFKDVD KFGNEITQLA RPLPVEYLII DITTFPKDP VYTFSISQNP FPIENRDVLG ETQDFHSLAT YLSQNTSSVF  
 LDTISDFHLL LFLVTNEVMP LQDSISLLE AVRTRNEELA QTWKRSEQWA TIEQLCSTVG GQLPGLHEYG AVGGSTHTAT AAMWACQHCT FMNQPGTGHC  
 EMCSLPRT

### targetp v1.1 prediction results #####  
 Number of query sequences: 1  
 Cleavage site predictions included.  
 Using NON-PLANT networks.

| Name     | Len | mTP   | SP    | other | Loc | RC | TPlen |
|----------|-----|-------|-------|-------|-----|----|-------|
| Sequence | 50  | 0.262 | 0.039 | 0.806 | -   | 3  | -     |
| cutoff   |     | 0.000 | 0.000 | 0.000 |     |    |       |

➤ **N-terminally extended THOP1; length=726aa**

VAAVAAVGPR QAASVAEVAG RVAGGRREGA AGADPPA MKPPAACAGD MADAASPCSV VNDLRWDLA QQIEERTREL IEQTKRVYDQ VGTQEFEDVS YESTLKALAD VEVITYTVQRN  
 ILDFPQHVSP SKDIRTASTE ADKKLSEFDV EMSMREDVYQ RIVWLQEKVQ KDSLRPEAAR YLERLIKLGR RNLHLHPRET QENIKRIKKK LSLLCIDFNK NLNEDTTFLP  
 FTLQELGGLP EDFLNSLEKM EDGKLVTLK YPHYFPLLKK CHVPETRRKV EEAFNCRCKE ENCAILKELV TLRAQKSRLG GFHTHADYVL EMNMAKTSQT VATFLDELAQ  
 KLKPLGEQER AVILELKRAE CERRGLPFDG RIRAWDMRYM MNQVEETRYC VDQNLKEYF PVQVVTHGLL GIYQELLGLA FHHEEGASAW HEDVRLYTAR DAASGEVVGK  
 FYLDLYPREG KYGHAACFGL QPGCLRQDGS RQIAIAAMVA NFKPTADAP SLLQHDEVET YFHEFGHVMH QLCSQAEFAM FSGTHVERDF VEAPSQMLEN WVWEQEPLLR  
 MSRHRTGSA VPRELLEKLI ESRQANTGLF NLRQIVLAKV DQALHTQTD A PAEEYARLC QEILGVPATP GTNMPATFGH LAGGYDAQYY GYLWSEVYSM DMFHTRFKQE  
 GVLNSKVGMD YRSCILRPGG SEDASAMLR FLGRDPKQDA FLLSKGLQVG GCEPEPQVC

### targetp v1.1 prediction results #####  
 Number of query sequences: 1  
 Cleavage site predictions included.  
 Using NON-PLANT networks.

| Name     | Len | mTP   | SP    | other | Loc | RC | TPlen |
|----------|-----|-------|-------|-------|-----|----|-------|
| Sequence | 40  | 0.527 | 0.059 | 0.478 | M   | 5  | 11    |
| cutoff   |     | 0.000 | 0.000 | 0.000 |     |    |       |

➤ **Canonical THOP1; length=689aa**

MKPPAACAGD MADAASPCSV VNDLRWDLA QQIEERTREL IEQTKRVYDQ VGTQEFEDVS YESTLKALAD VEVITYTVQRN ILDFPQHVSP SKDIRTASTE ADKKLSEFDV  
 EMSMREDVYQ RIVWLQEKVQ KDSLRPEAAR YLERLIKLGR RNLHLHPRET QENIKRIKKK LSLLCIDFNK NLNEDTTFLP FTLQELGGLP EDFLNSLEKM EDGKLVTLK  
 YPHYFPLLKK CHVPETRRKV EEAFNCRCKE ENCAILKELV TLRAQKSRLG GFHTHADYVL EMNMAKTSQT VATFLDELAQ KLKPLGEQER AVILELKRAE CERRGLPFDG  
 RIRAWDMRYM MNQVEETRYC VDQNLKEYF PVQVVTHGLL GIYQELLGLA FHHEEGASAW HEDVRLYTAR DAASGEVVGK FYLDLYPREG KYGHAACFGL QPGCLRQDGS  
 RQIAIAAMVA NFKPTADAP SLLQHDEVET YFHEFGHVMH QLCSQAEFAM FSGTHVERDF VEAPSQMLEN WVWEQEPLLR MSRHRTGSA VPRELLEKLI ESRQANTGLF  
 NLRQIVLAKV DQALHTQTD A PAEEYARLC QEILGVPATP GTNMPATFGH LAGGYDAQYY GYLWSEVYSM DMFHTRFKQE GVLNSKVGMD YRSCILRPGG SEDASAMLR  
 FLGRDPKQDA FLLSKGLQVG GCEPEPQVC

### targetp v1.1 prediction results #####  
 Number of query sequences: 1  
 Cleavage site predictions included.  
 Using NON-PLANT networks.

| Name     | Len | mTP   | SP    | other | Loc | RC | TPlen |
|----------|-----|-------|-------|-------|-----|----|-------|
| Sequence | 40  | 0.089 | 0.084 | 0.886 | _   | 2  | -     |
| cutoff   |     | 0.000 | 0.000 | 0.000 |     |    |       |

## DESCRIPTION

The output is a table in plain text (see the example below). For each input sequence one table row is output. The columns are as follows:

|                     |                                                                                                                                                                                                                                                                                                                                                                                                                                                                                                                                                                                                                 |
|---------------------|-----------------------------------------------------------------------------------------------------------------------------------------------------------------------------------------------------------------------------------------------------------------------------------------------------------------------------------------------------------------------------------------------------------------------------------------------------------------------------------------------------------------------------------------------------------------------------------------------------------------|
| Name                | Sequence name truncated to 20 characters                                                                                                                                                                                                                                                                                                                                                                                                                                                                                                                                                                        |
| Len                 | Sequence length                                                                                                                                                                                                                                                                                                                                                                                                                                                                                                                                                                                                 |
| cTP, mTP, SP, other | Final NN scores on which the final prediction is based (Loc, see below). Note that the scores are not really probabilities, and they do not necessarily add to one. However, the location with the highest score is the most likely according to TargetP, and the relationship between the scores (the reliability class, see below) may be an indication of how certain the prediction is.                                                                                                                                                                                                                     |
| Loc                 | <p>Prediction of localization, based on the scores above; the possible values are:</p> <p>C Chloroplast, i.e. the sequence contains cTP, a chloroplast transit peptide;</p> <p>M Mitochondrion, i.e. the sequence contains mTP, a mitochondrial targeting peptide;</p> <p>S Secretory pathway, i.e. the sequence contains SP, a signal peptide;</p> <p>– Any other location;</p> <p>* "don't know"; indicates that cutoff restrictions were set (see instructions) and the winning network output score was below the requested cutoff for that category.</p>                                                   |
| RC                  | <p>Reliability class, from 1 to 5, where 1 indicates the strongest prediction. RC is a measure of the size of the difference ('diff') between the highest (winning) and the second highest output scores. There are 5 reliability classes, defined as follows:</p> <p>1 : <math>\text{diff} &gt; 0.800</math></p> <p>2 : <math>0.800 &gt; \text{diff} &gt; 0.600</math></p> <p>3 : <math>0.600 &gt; \text{diff} &gt; 0.400</math></p> <p>4 : <math>0.400 &gt; \text{diff} &gt; 0.200</math></p> <p>5 : <math>0.200 &gt; \text{diff}</math></p> <p>Thus, the lower the value of RC the safer the prediction.</p> |
| TPlen               | Predicted presequence length; it appears only when TargetP was asked to perform cleavage site predictions (see instructions).                                                                                                                                                                                                                                                                                                                                                                                                                                                                                   |
