# Supplementary material for: Discovery of coding regions in the human genome by integrated proteogenomics analysis workflow
Source: PubMed Central journal article supplement (PMC5834625; doi:10.1038/s41467-018-03311-y), 2018-03-02
Supplement: 41467_2018_3311_MOESM10_ESM.pdf [file 41467_2018_3311_MOESM10_ESM.pdf]

40 novel protein coding loci with  
multiple peptides that are linked to  
in-frame initiation start codons

CUG start codon, classified stong Kozak

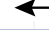

HNRNPUL2.alt.ORF

HNRNPUL2

Novel peptides

AAVCAAAGPGLAR    EAEAGGGGACAVLGR  
FAGEEAAGGGGGGGDGEAESDR

RNA-seq reads coverage (A431)

CAGE (transcription start sites)

Riboprofile (translation start sites)

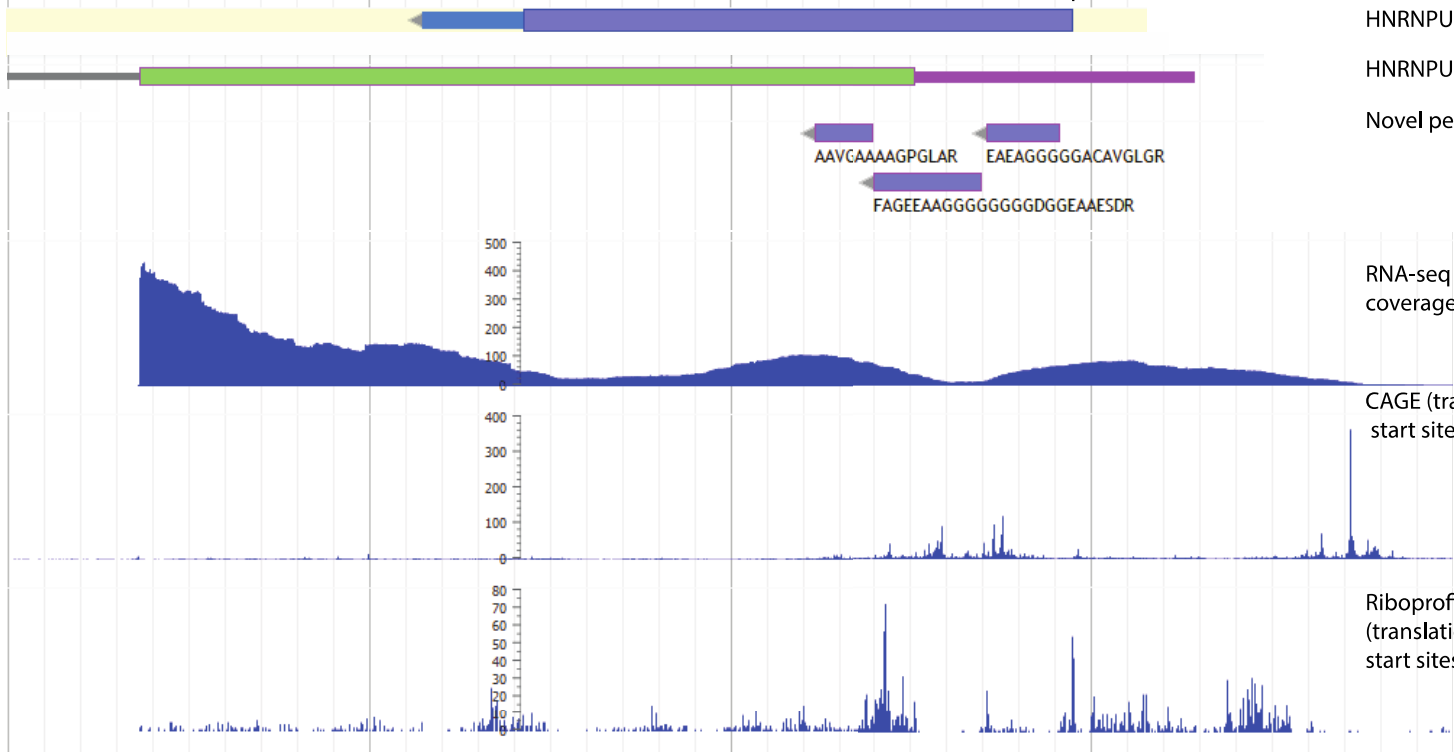

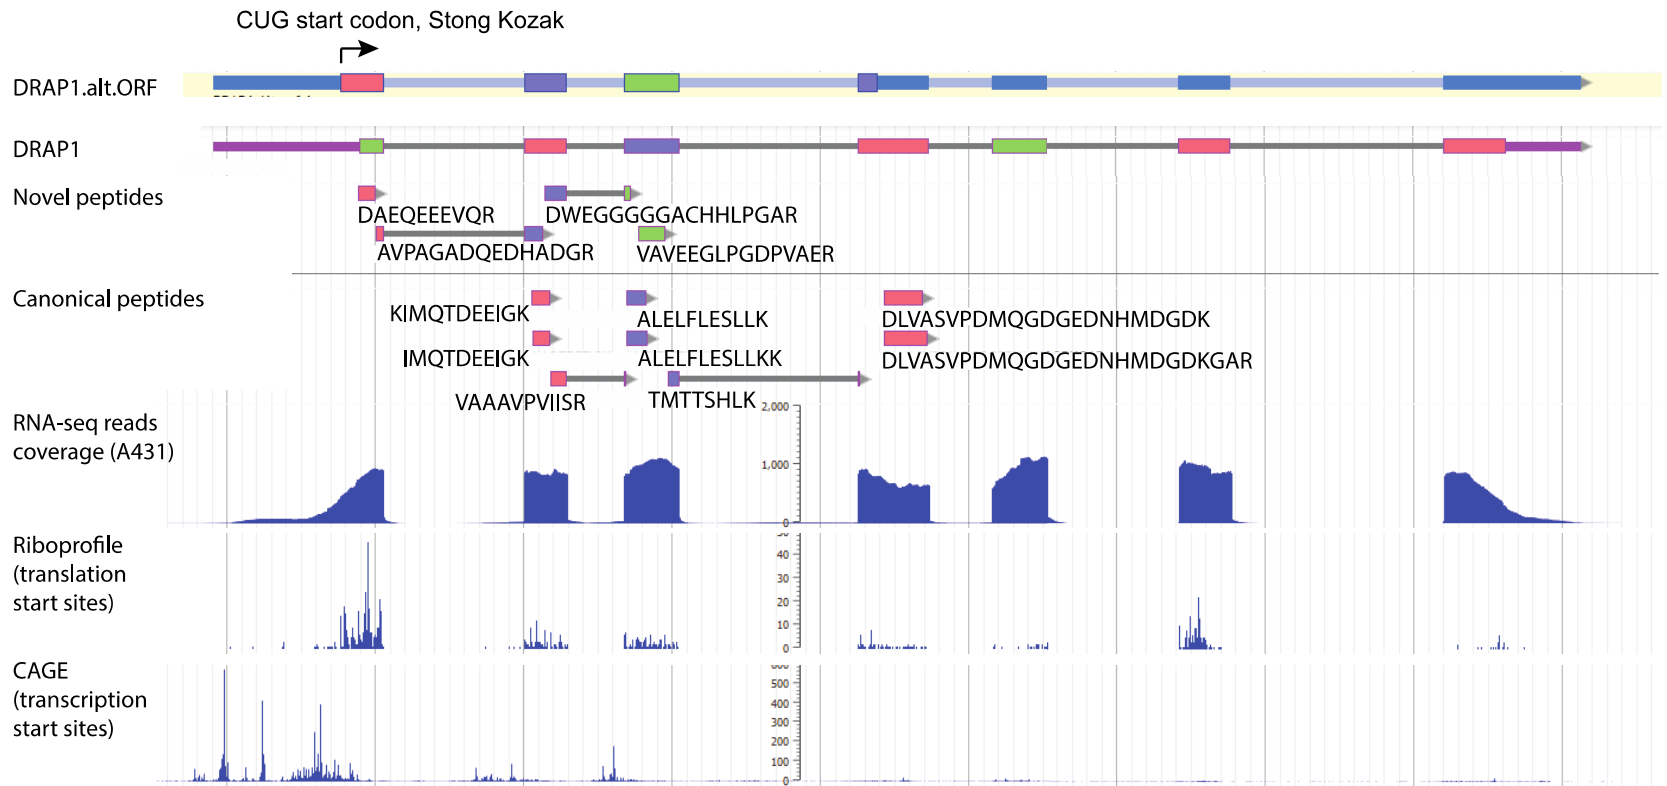

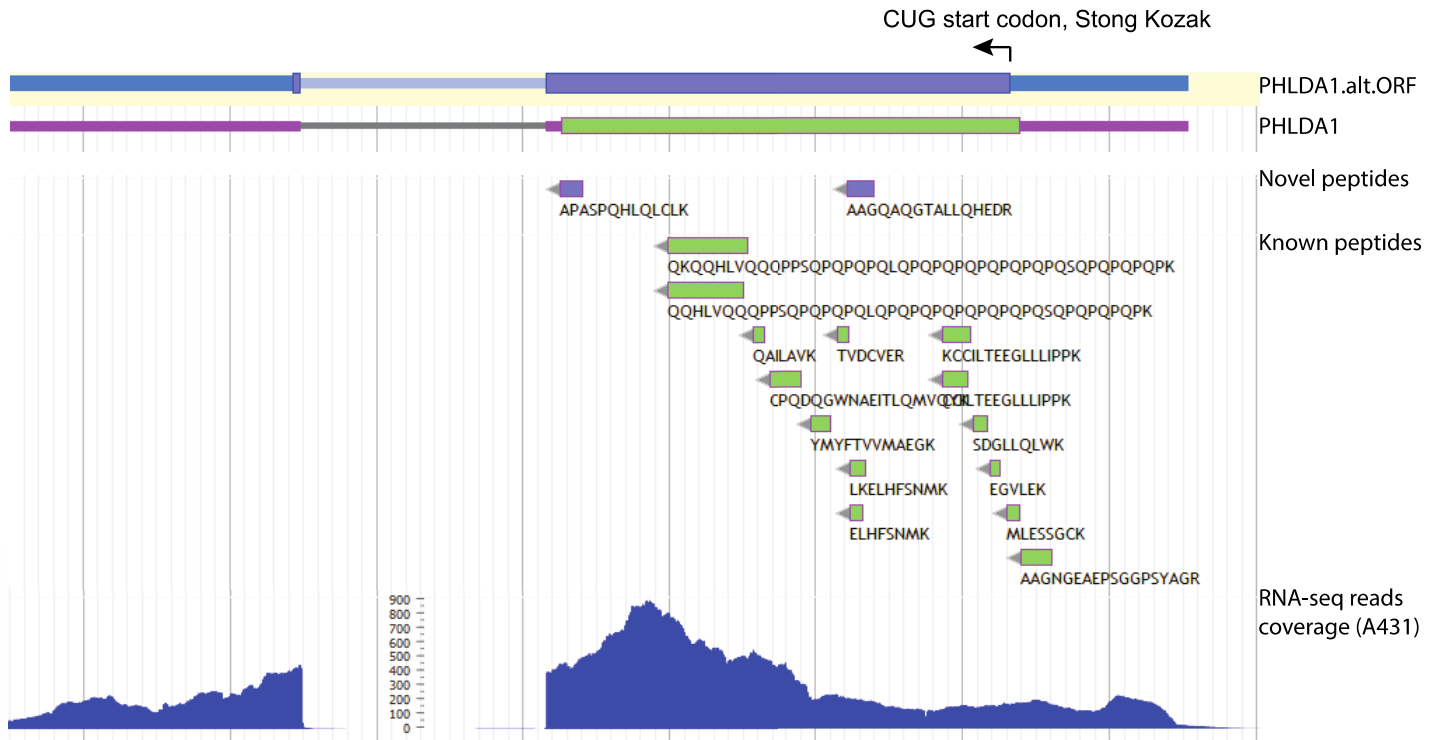

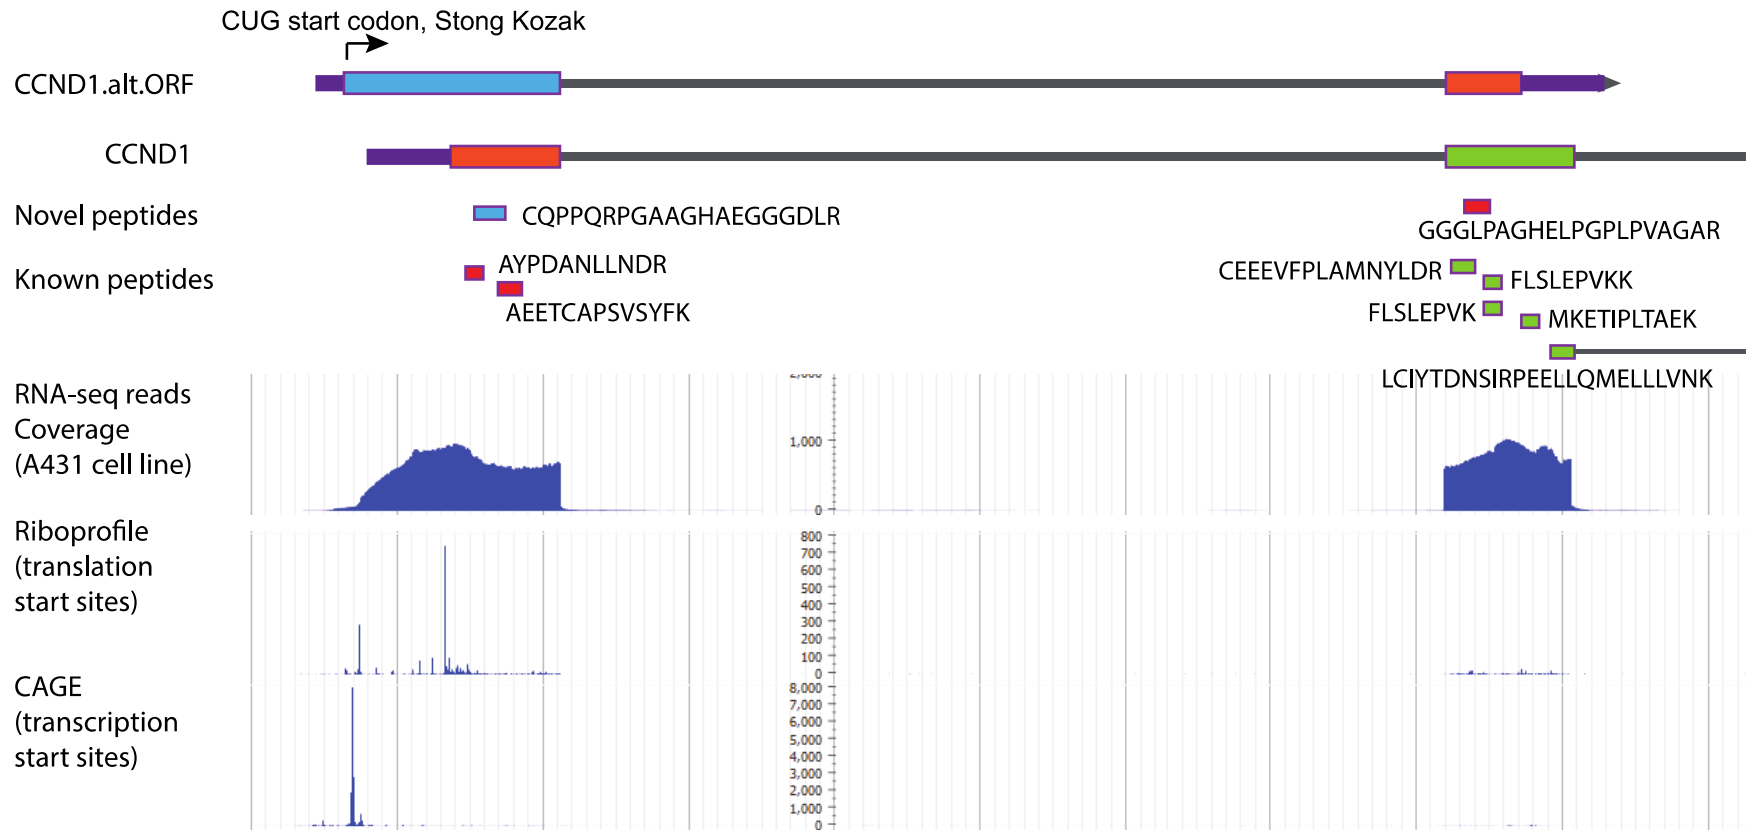

AUG start codon, Moderate Kozak

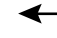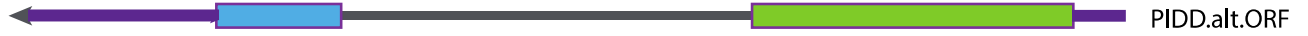

PIDD.alt.ORF

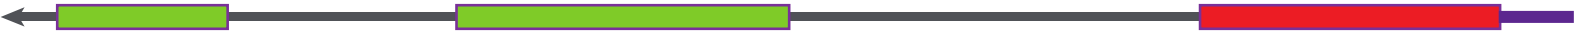

PIDD

GPSAAGGHPGPAASEPVLPLPGPQR

GLPAAAAPVCPAASAAAAGGILASEHSR

ATPGHTGCLSPGCPDQPAR

LSTHEDPQLEATLAQLPQSLCLR

Novel peptide

Known peptide

100 vertebrate conservation

RNA-seq reads coverage (A431)

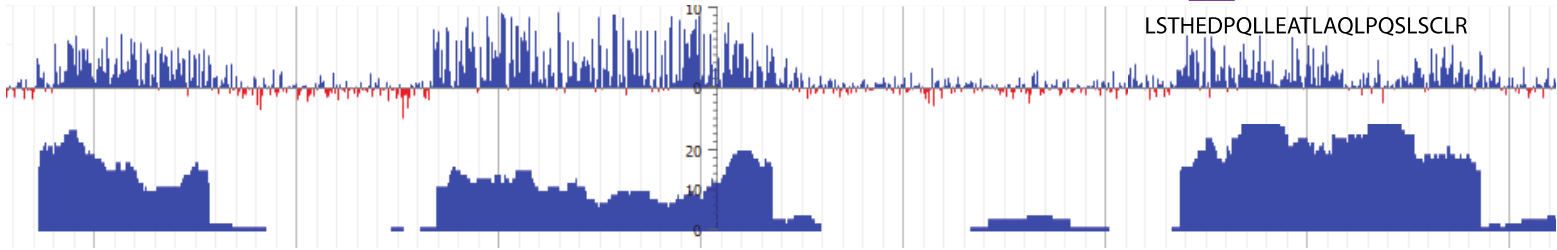

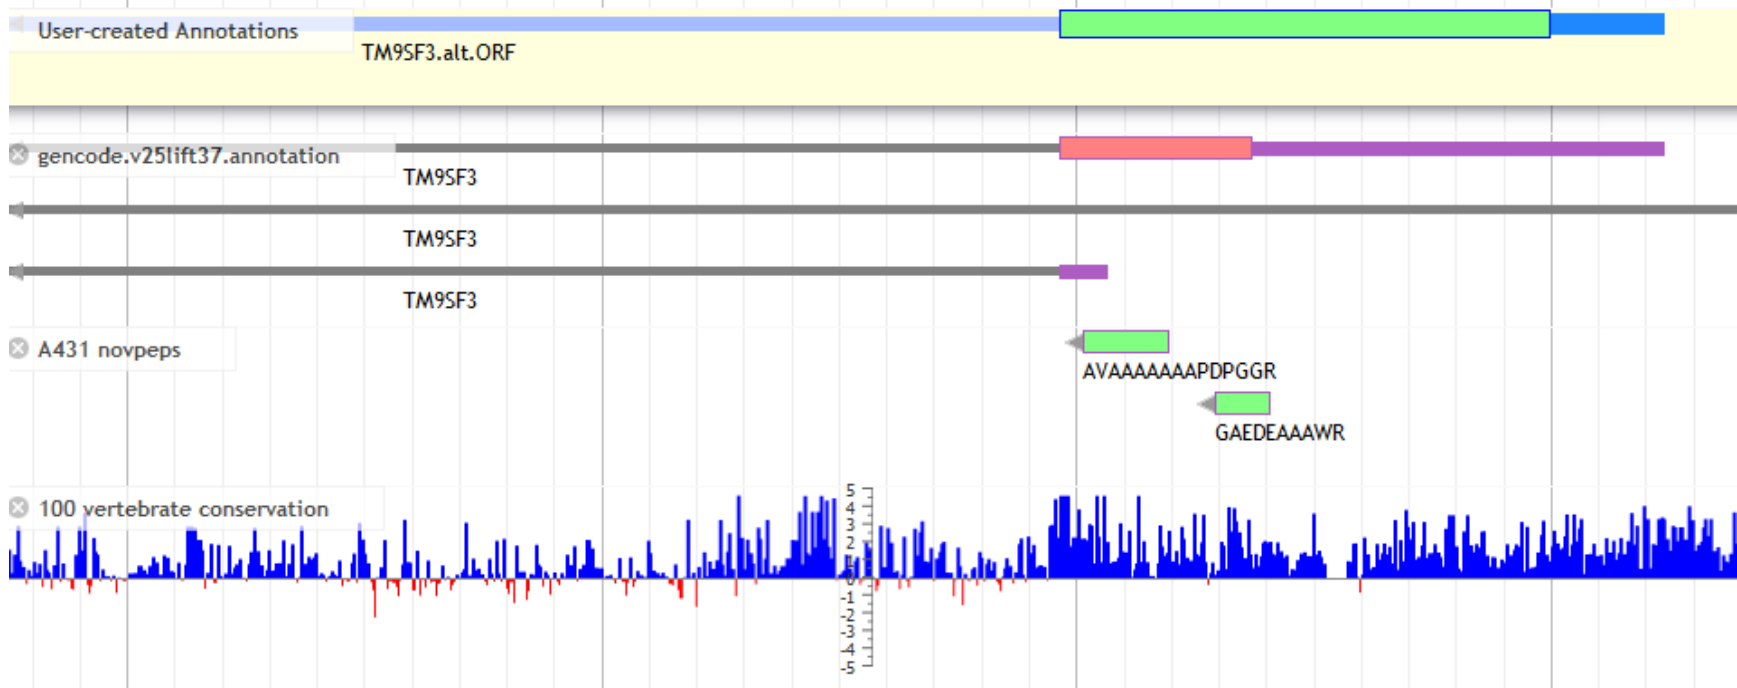

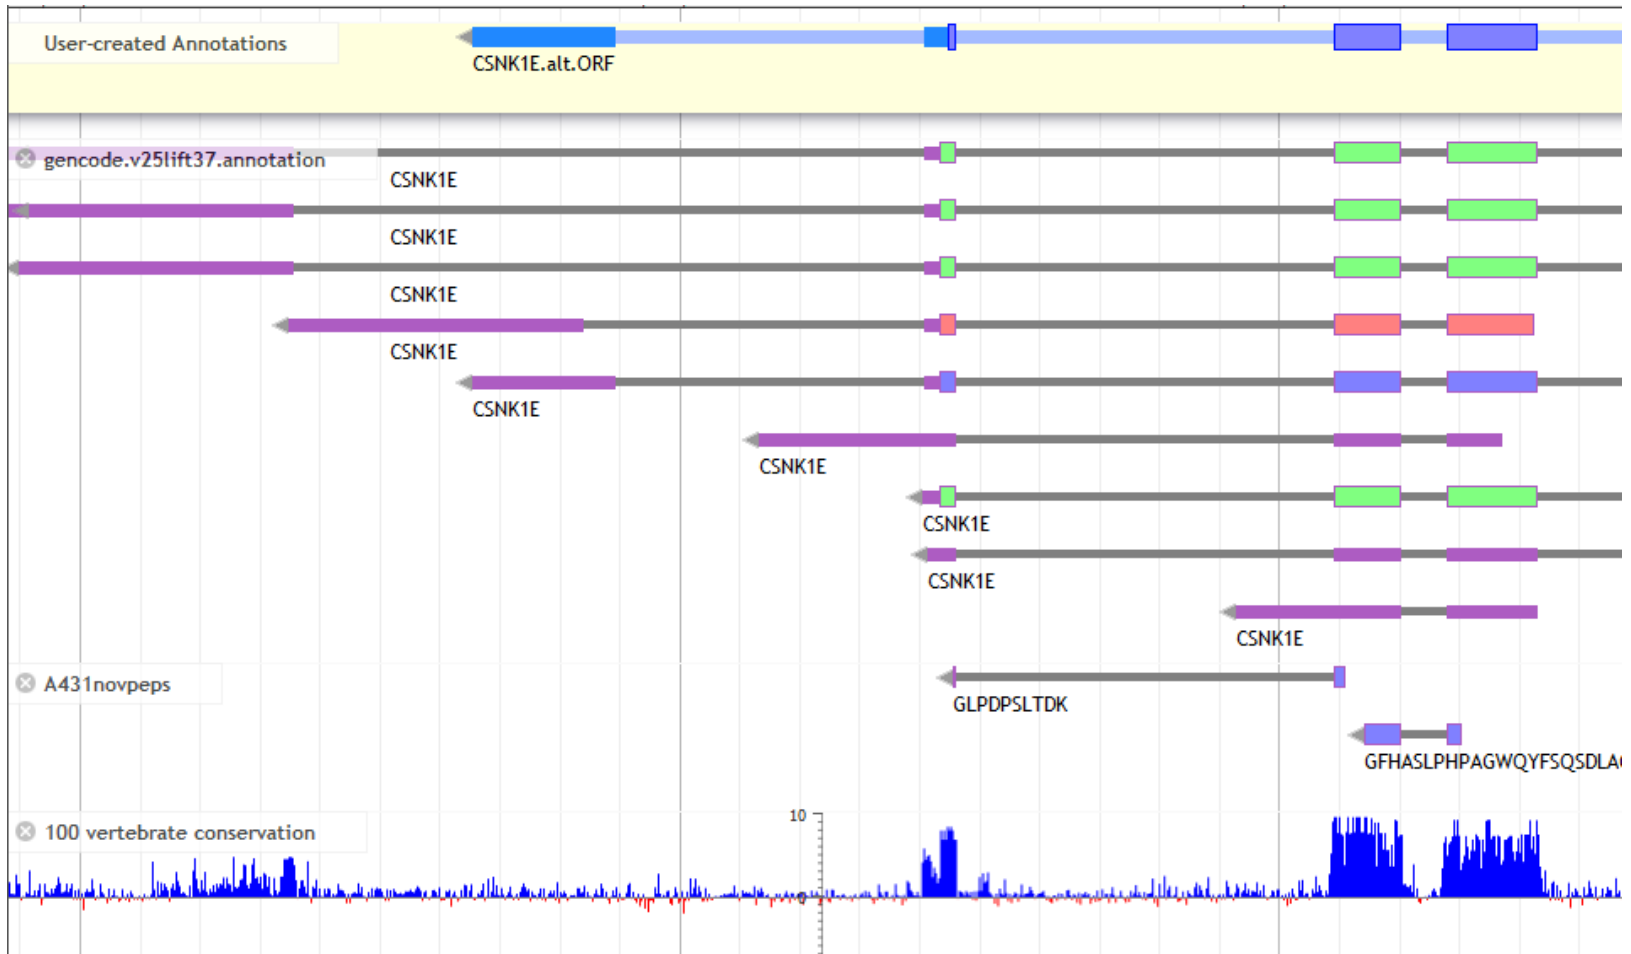



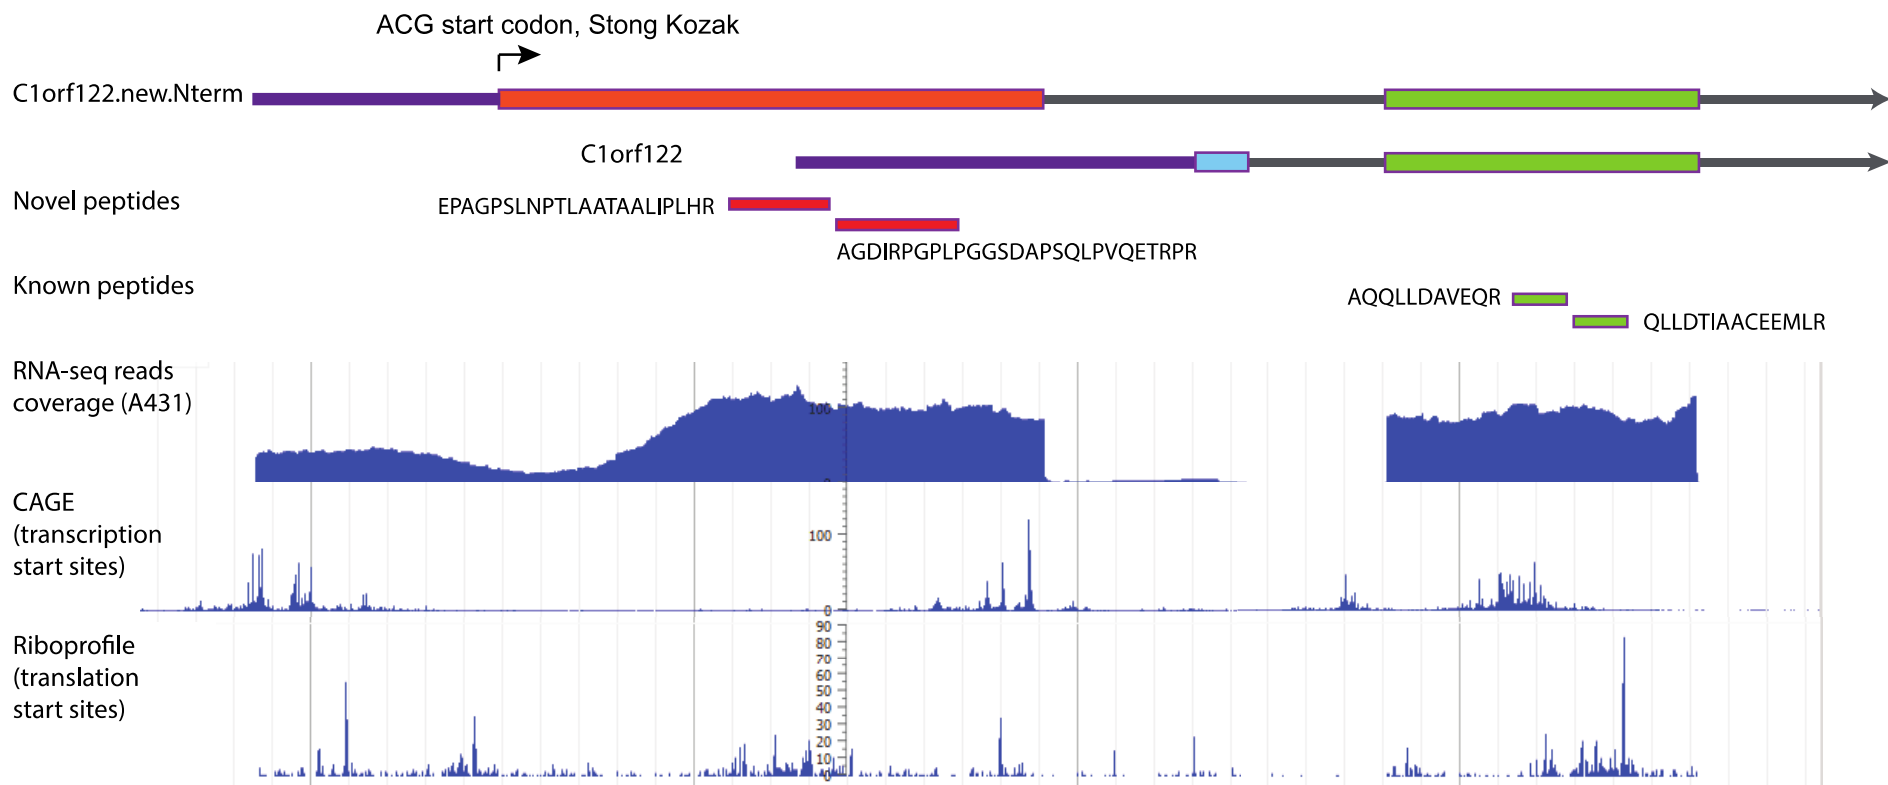

GUG start codon, Strong Kozak

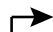

THOP1.new.Nterm

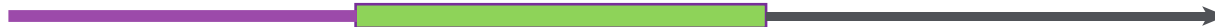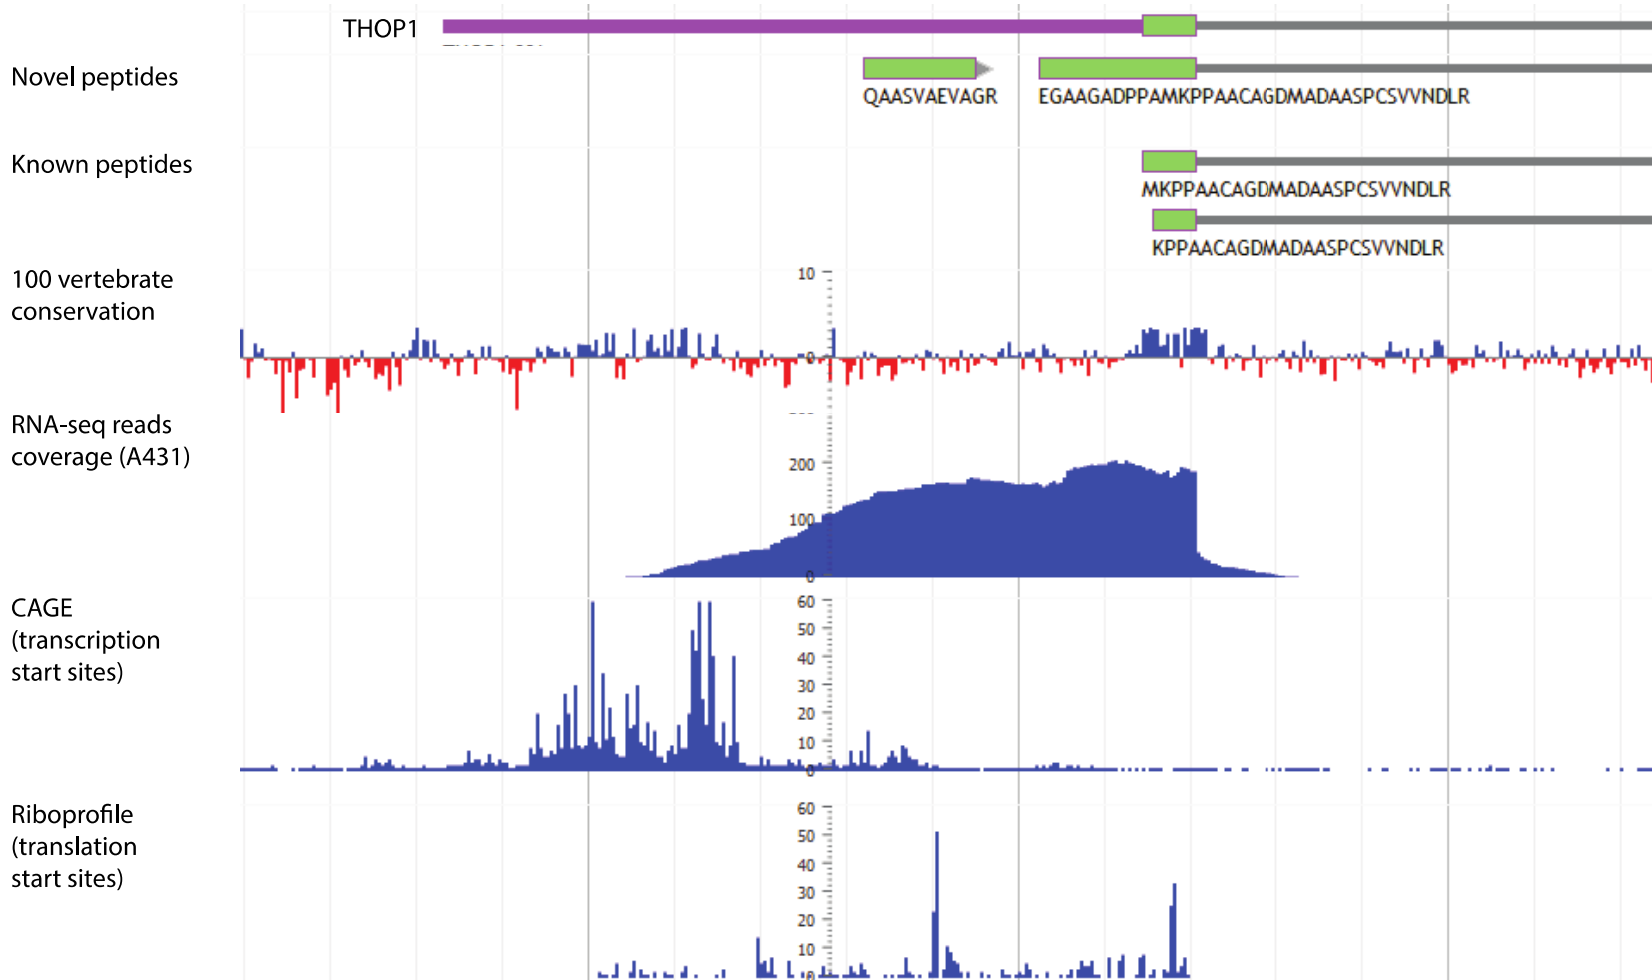

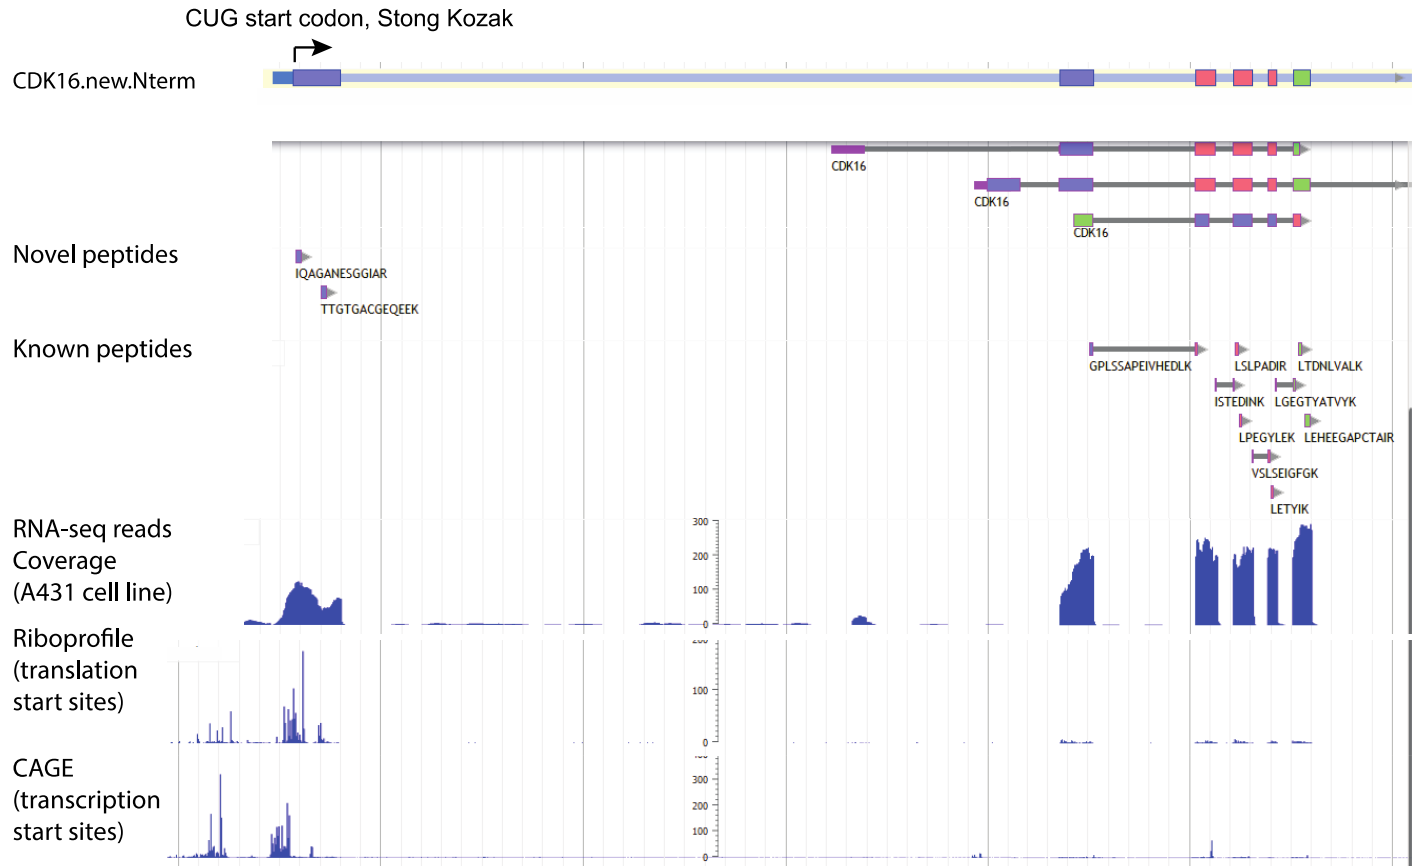

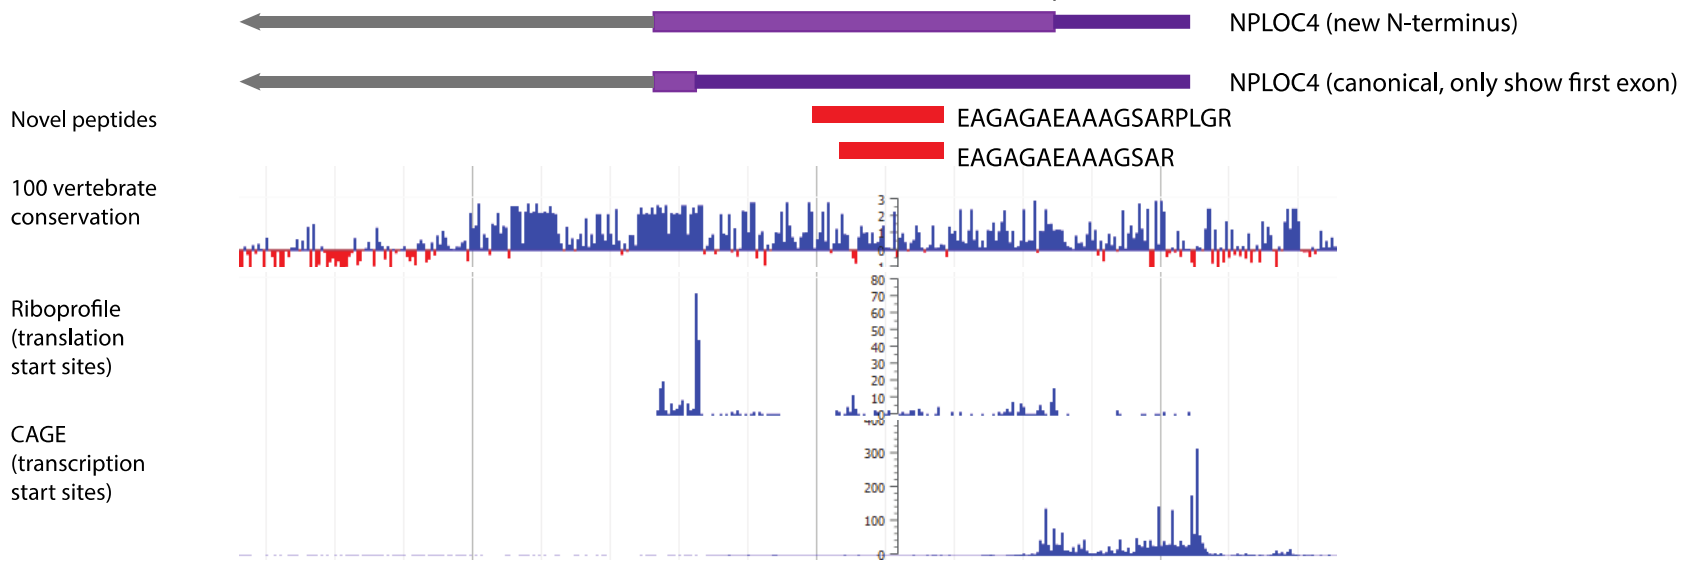

GUG start codon, Strong Kozak

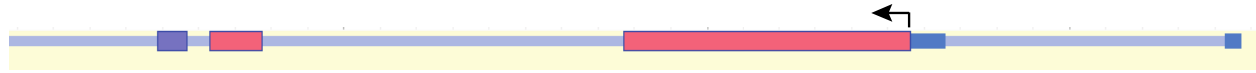

HEL22.new.N-term

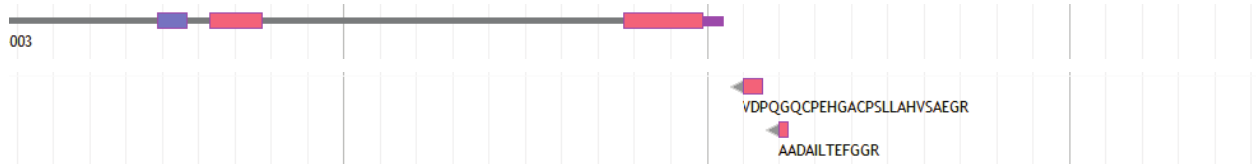

HEL22

Novel peptides

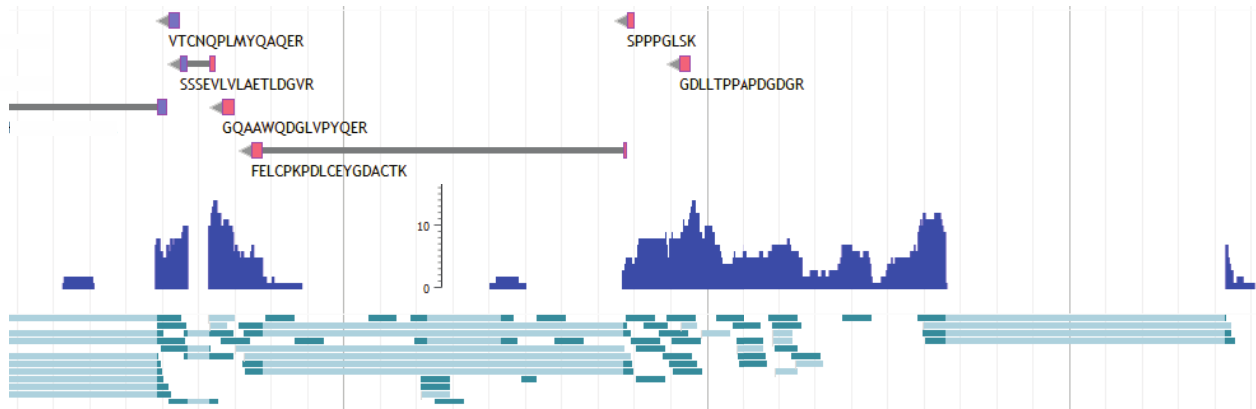

Known peptides

RNA-seq reads coverage (A431)

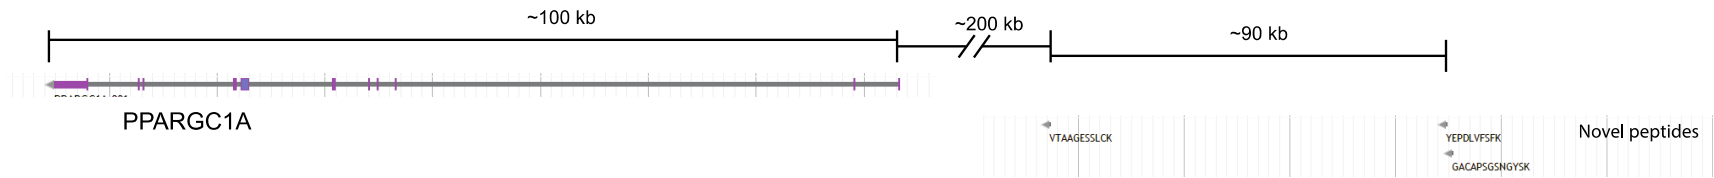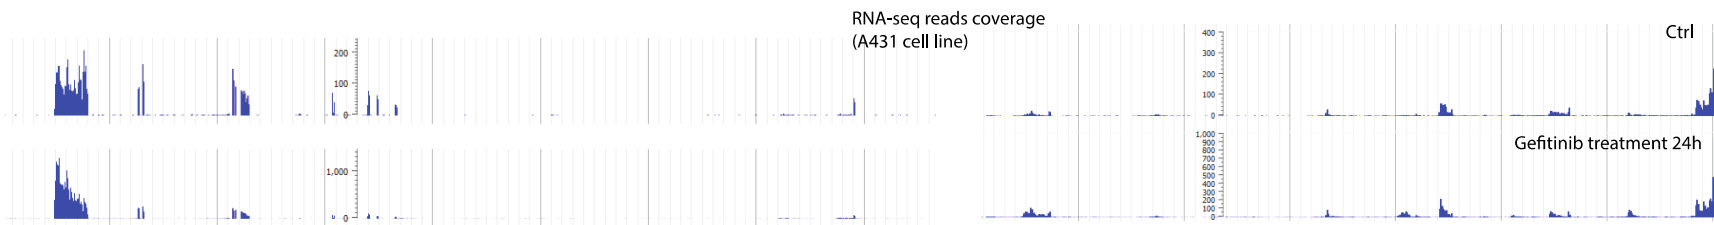

EXOC3L2  
new N-term

EXOC3L2.new.N-term

EXOC3L2

EXOC3L2-201

Novel peptides

DVALLYEALQR

ADEHILELEAEELAPSR

Known peptides

DLESEEGALSPPR

RMQDEPYQALVAELHR

EASASALDHVTR

GLEDECVTDVK

HVAALLDIR

MQDEPYQALVAELHR

VGPPSEPAR ISQEFGER

DYPDIDR

VVANLLFQELQPHFNK

EMLPDTYISK

RNA-seq coverage

0  
-10  
-20

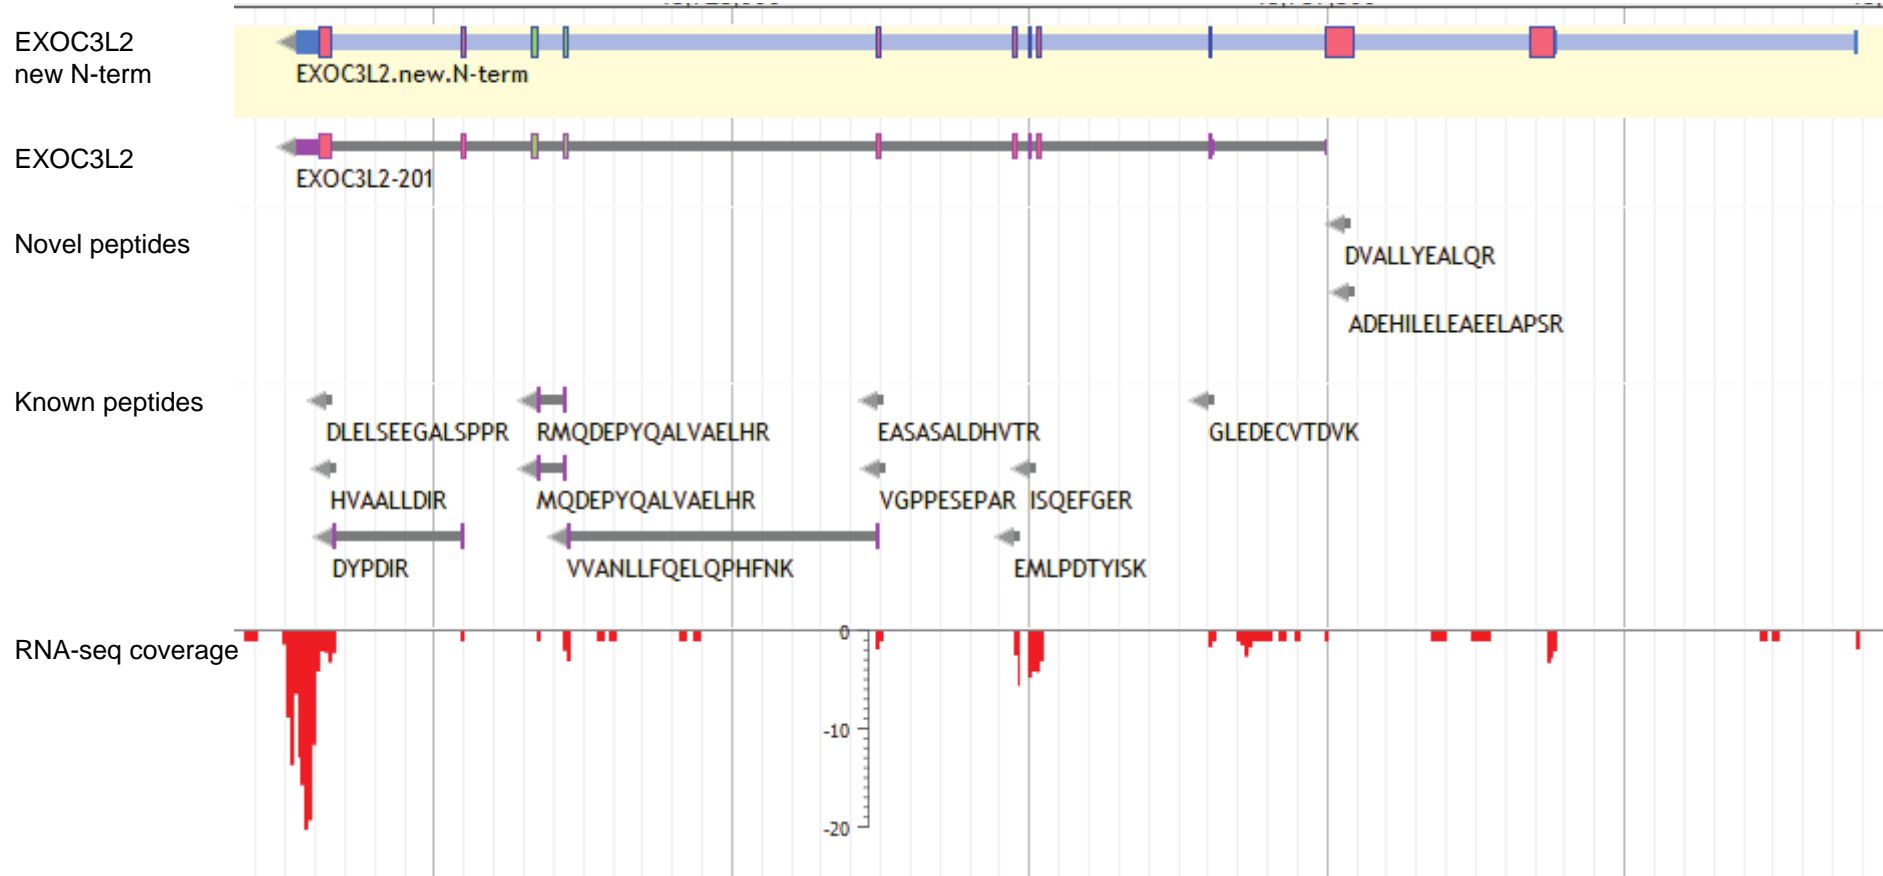

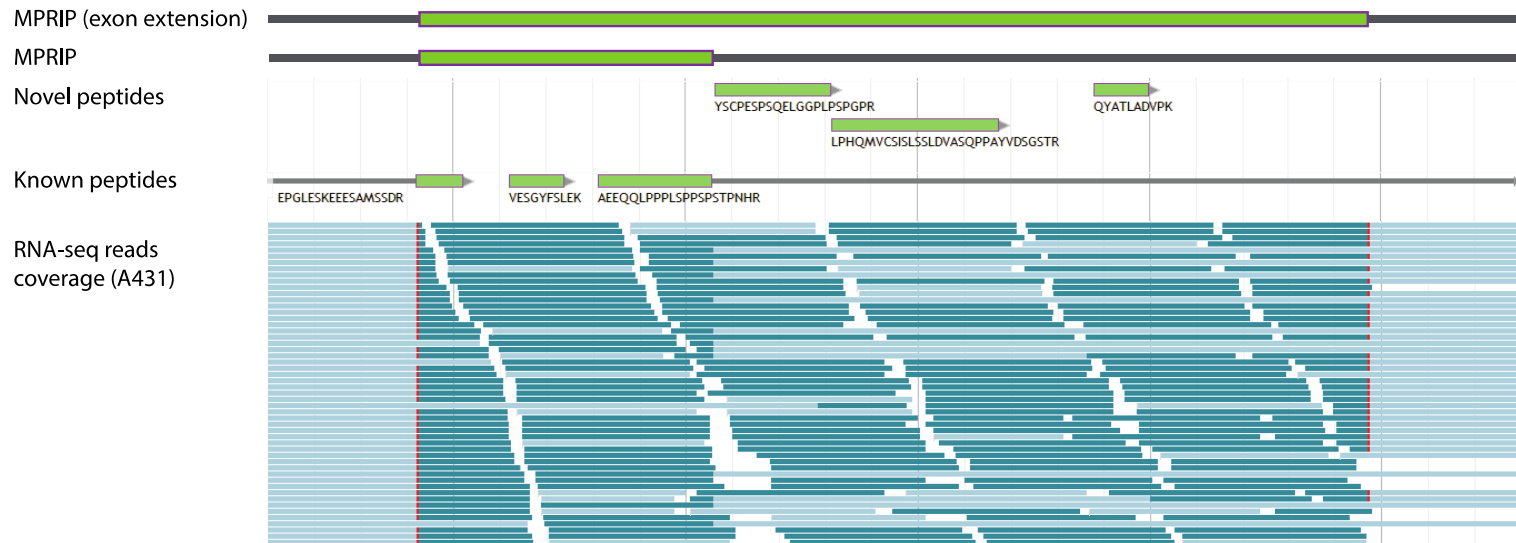



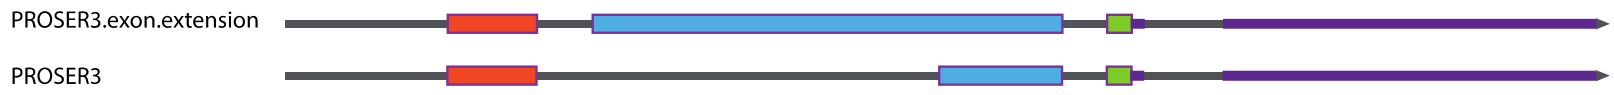

Novel peptides

APRPEAAEQVPAAGQGGPQLR ■ ■ LFPDSLEDTPPHFEGPPPK

Known peptides

KLEQAQGSK ■ ■ ALPPAAGSVIR ■ KSEATPSGACLQPEVPLSPAEQATTVK

RNA-seq reads coverage (A431)

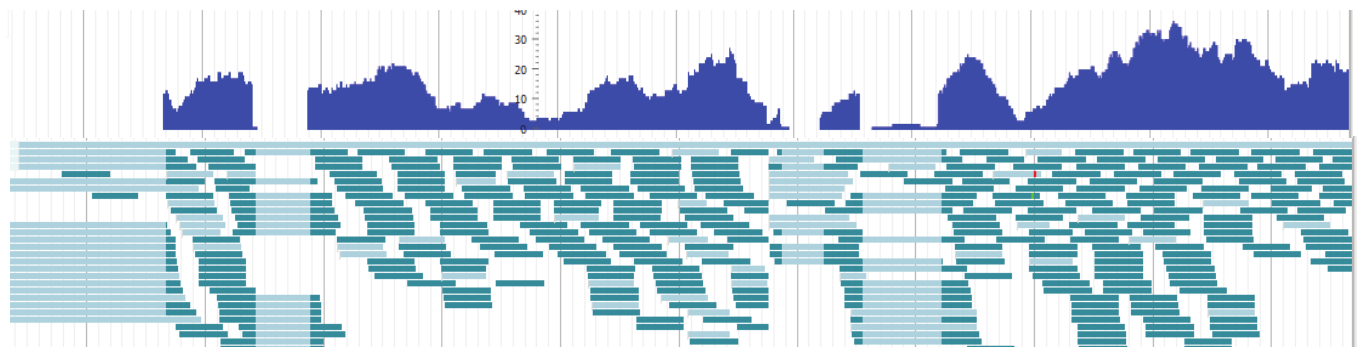

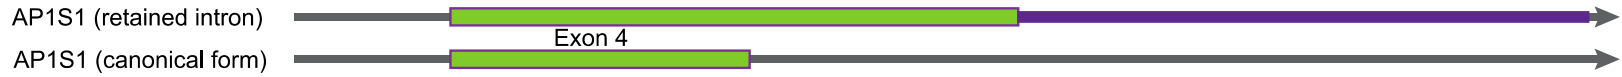

Novel peptides

AIEQADLLQEVK

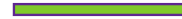

DSEEEEEAHSGGQGPPSPGHPACPAHR

RNA-seq  
reads coverage  
(A431 cell line)

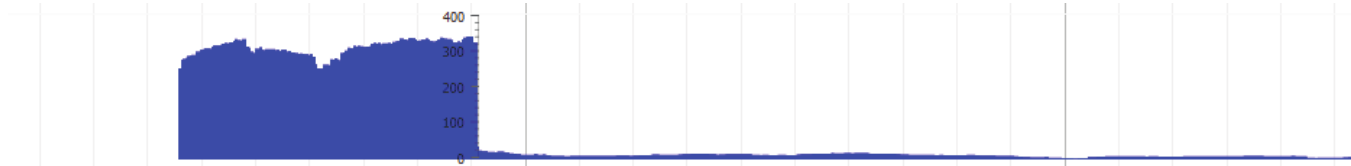

RNA-seq  
raw reads  
(not all reads shown)

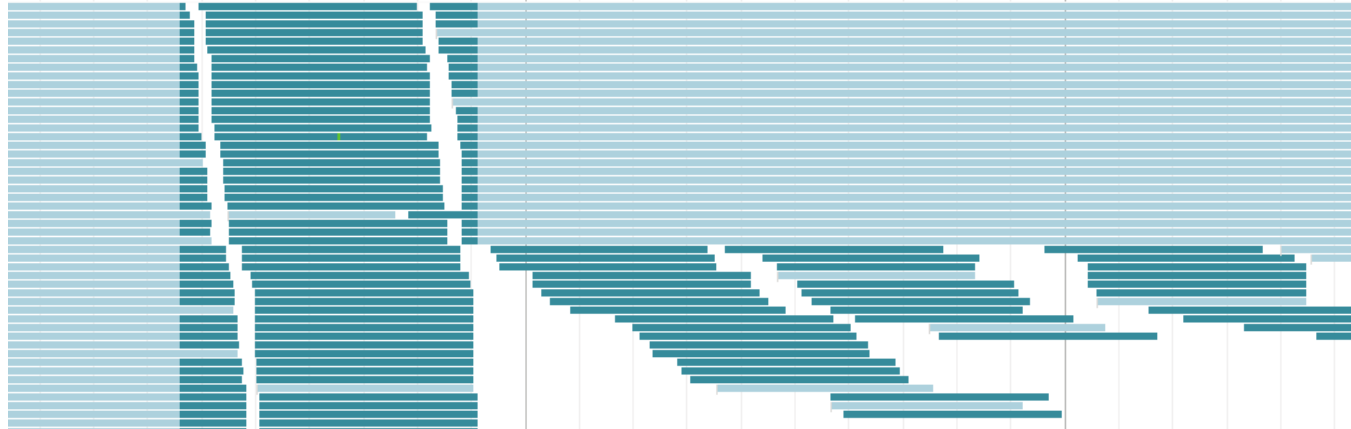

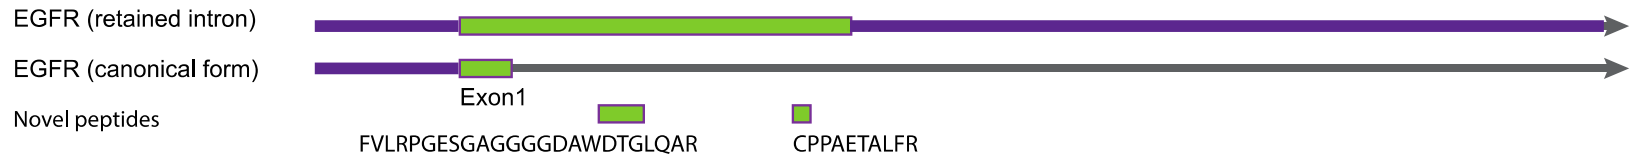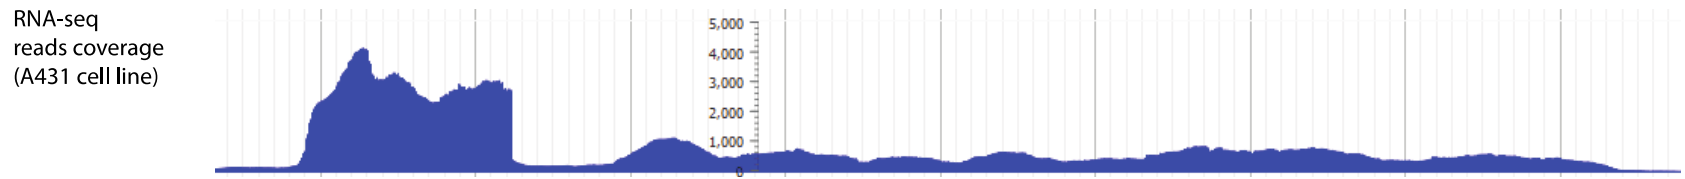

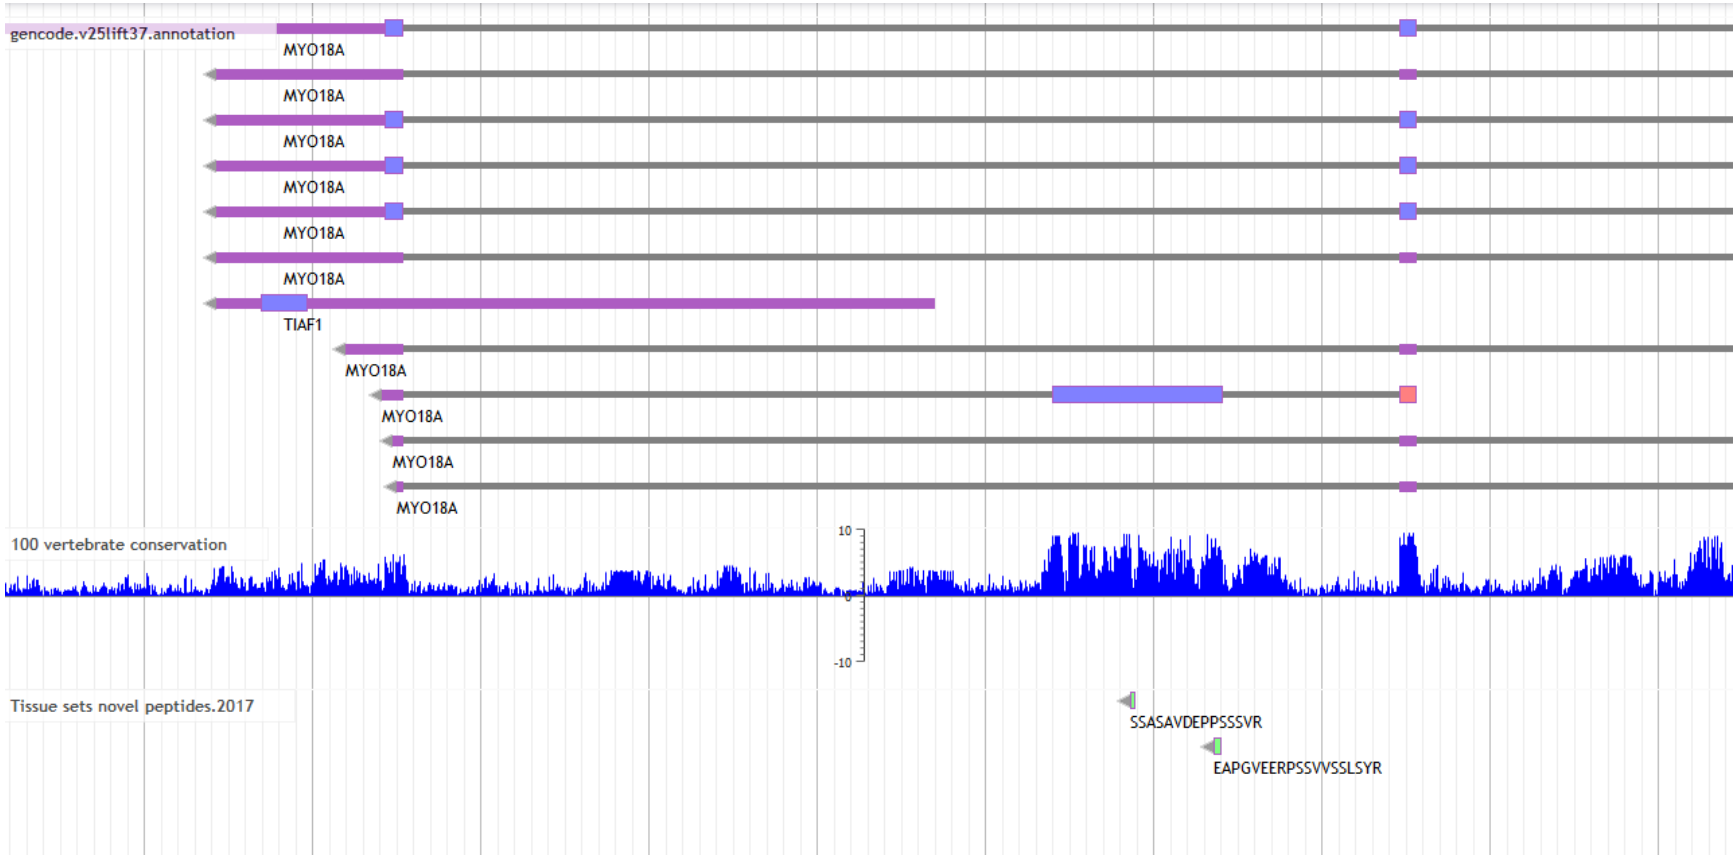

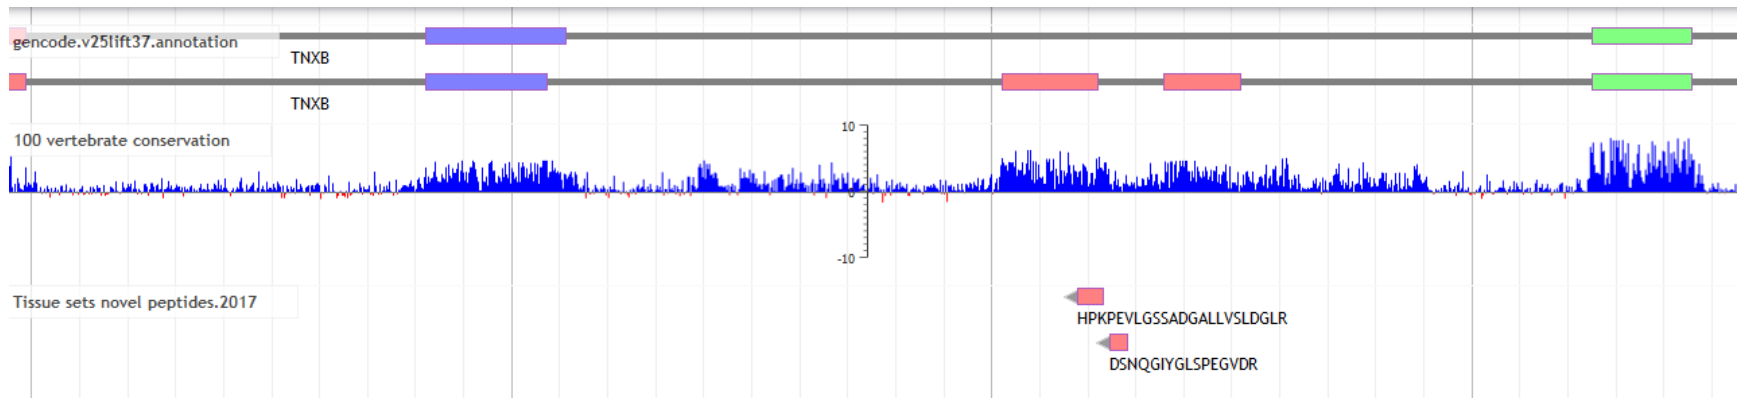

Evidence based  
gene model

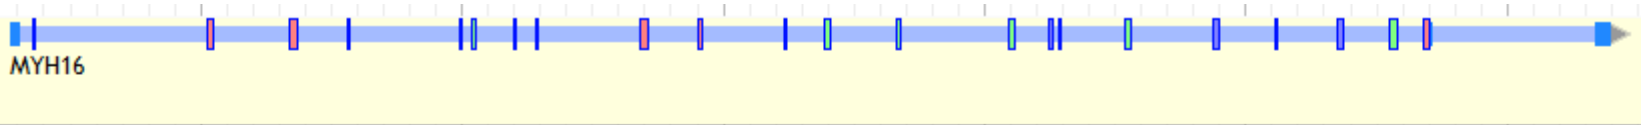

RNA-seq reads  
coverage (A431)

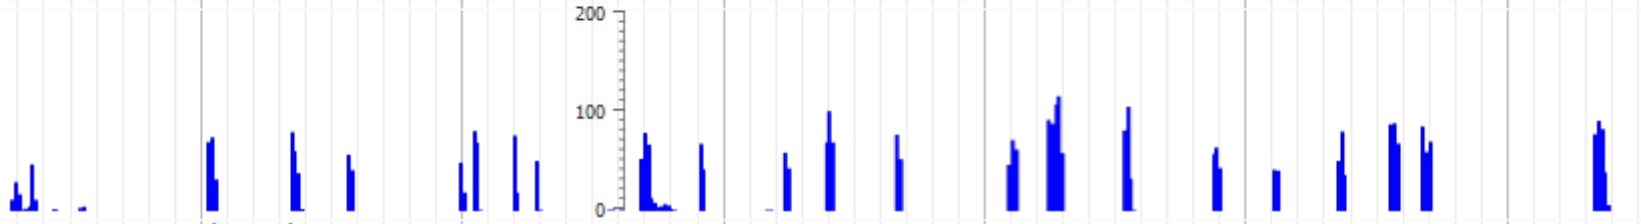

Novel peptides

NDLTIQLQAEQENLMDAEEK  
MDLESQISDMR LSTQIHELEDNWEQEK LEDSLSEANAK  
LEEEEGMAASLSAAK DLEINSVNSK AEIDDLNASMETIQK  
DLEGLETTLAK YEDEQSLNSTLQR NQAEINAIR STAVVSLANTK  
HVDSMAELTEHVESLQR  
LQAENSELSR  
EQLEEEQGGK  
LNTEVTTWR  
LQAEVEDLTIDLEK  
AIESLQASLEAEAK  
ANAAAAALDK DLQVQMDEDAR ELETLDGEQK  
CEELQVEVDSSQK LSLQTELEEVK ELVFQTEEDHK  
MYMTESFKMETDLNEMEIQLDHANK QIEEAEDQANQTLAR  
TAYEESLEHLESVK ISNEHEELISEFR  
DLIDQLGEGGR MEEAEQLALK  
EELQVALEEAESSLEVEESK TVHELDDAEDR  
AGMAETALNK  
GITSVEIIQVSK

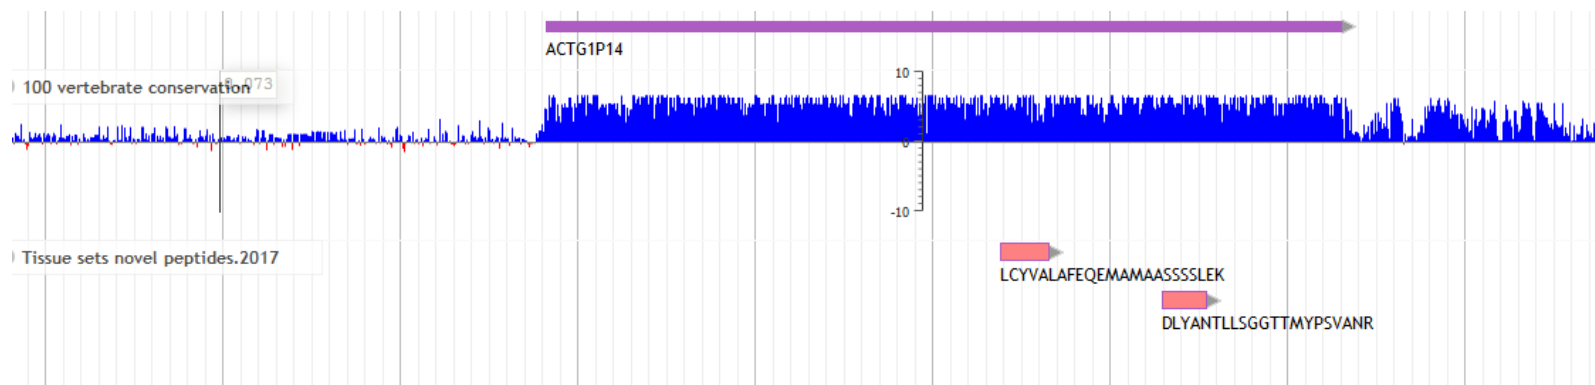

gencode.v25lift37.annotation

ACTBP8

A431 novpeps

DLYANTVLSGGTNMYPGITDR

CPEALFQPSFLGMESCGIHDTTFNSIMK

LCYVALEFEQEMASAASSSLEK

100 vertebrate conservation

10

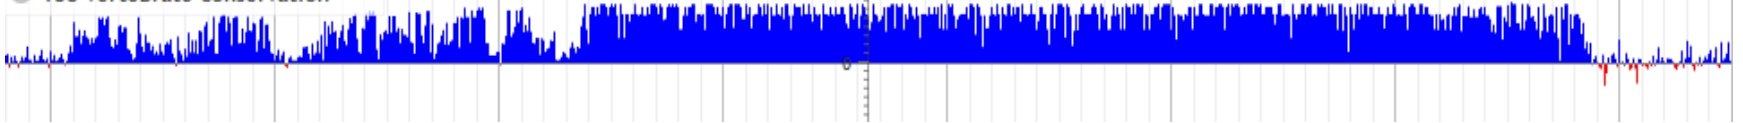



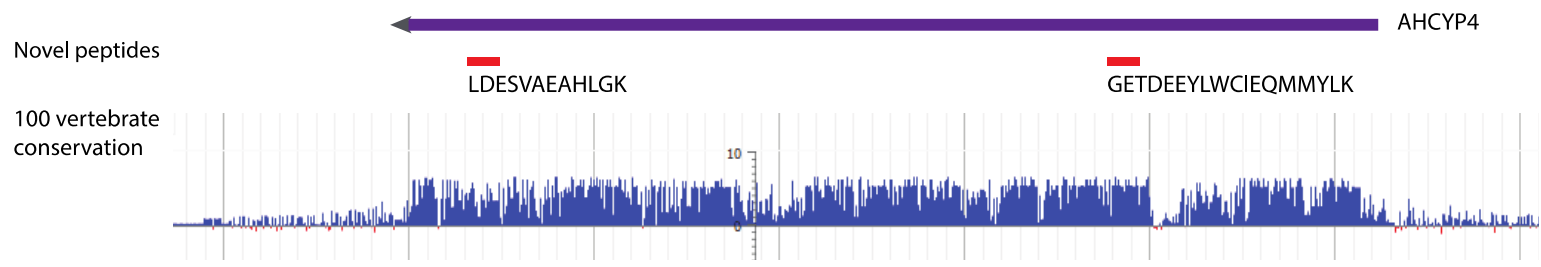

Novel peptides

100 vertebrate  
conervation

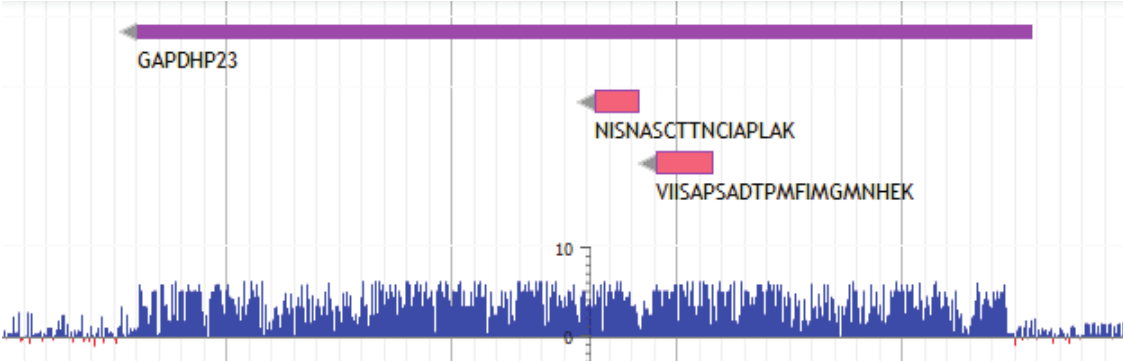

Novel peptides

100 vertebrate  
conervation

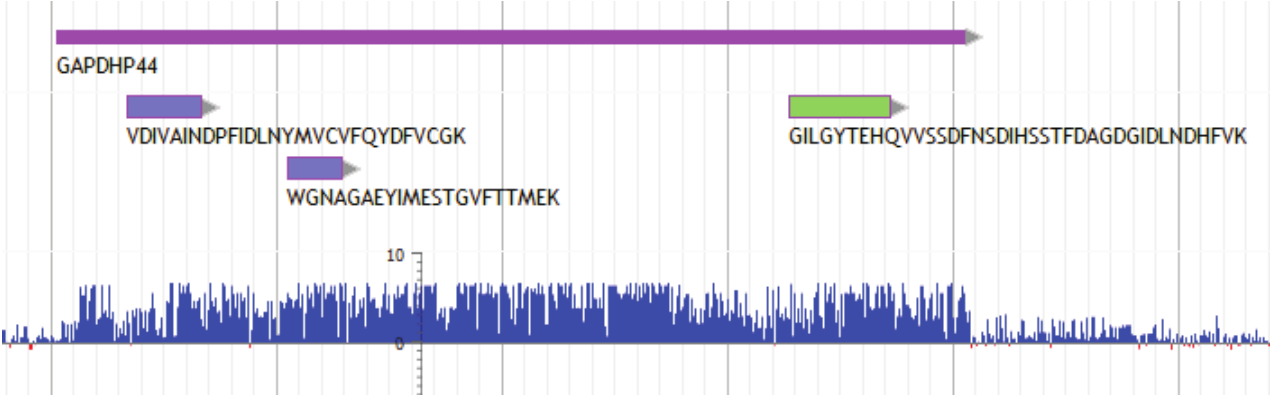

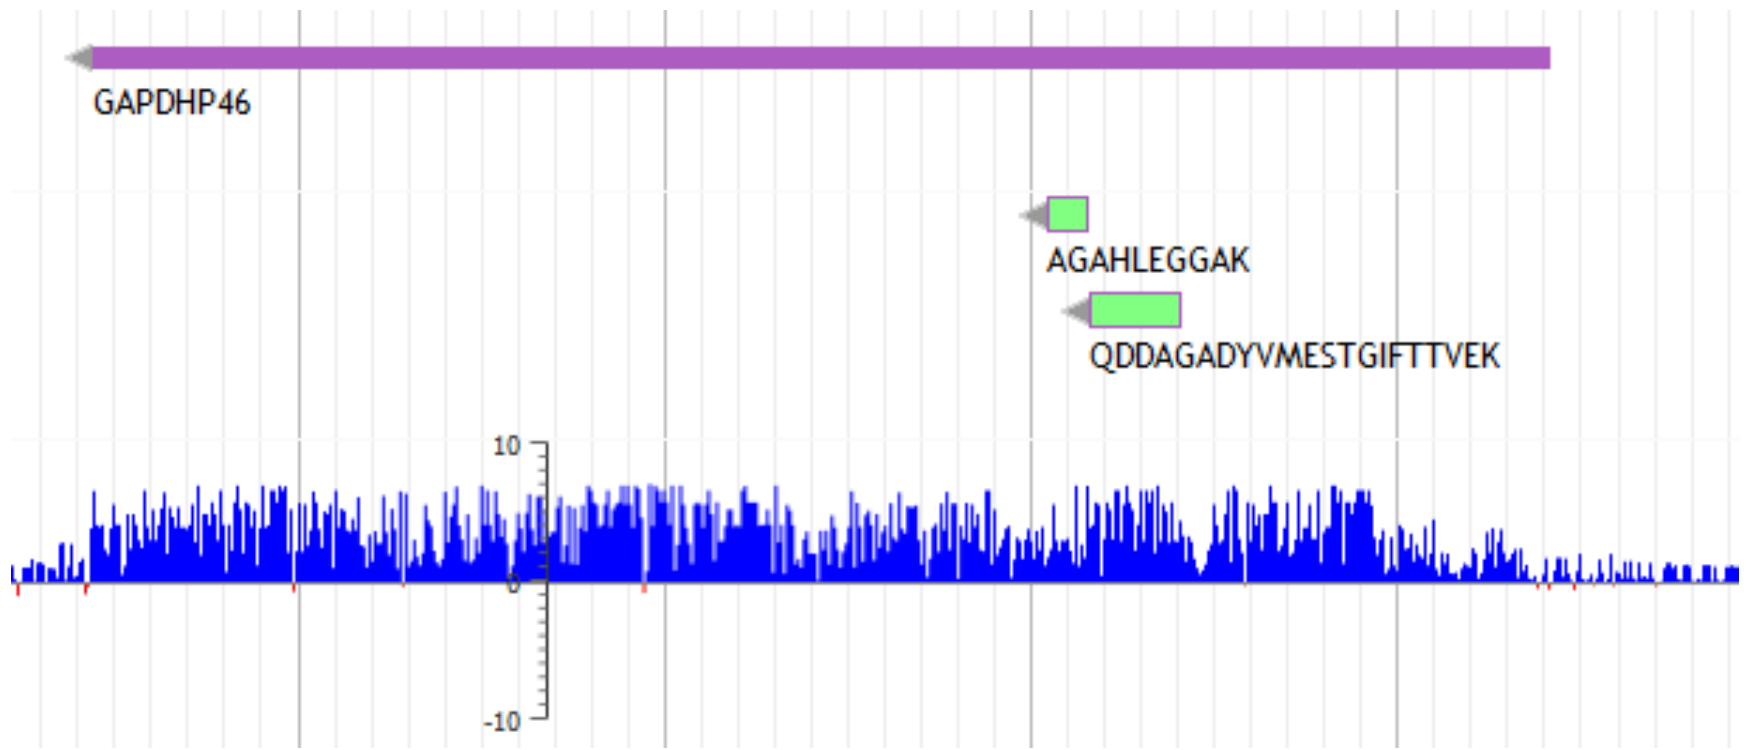

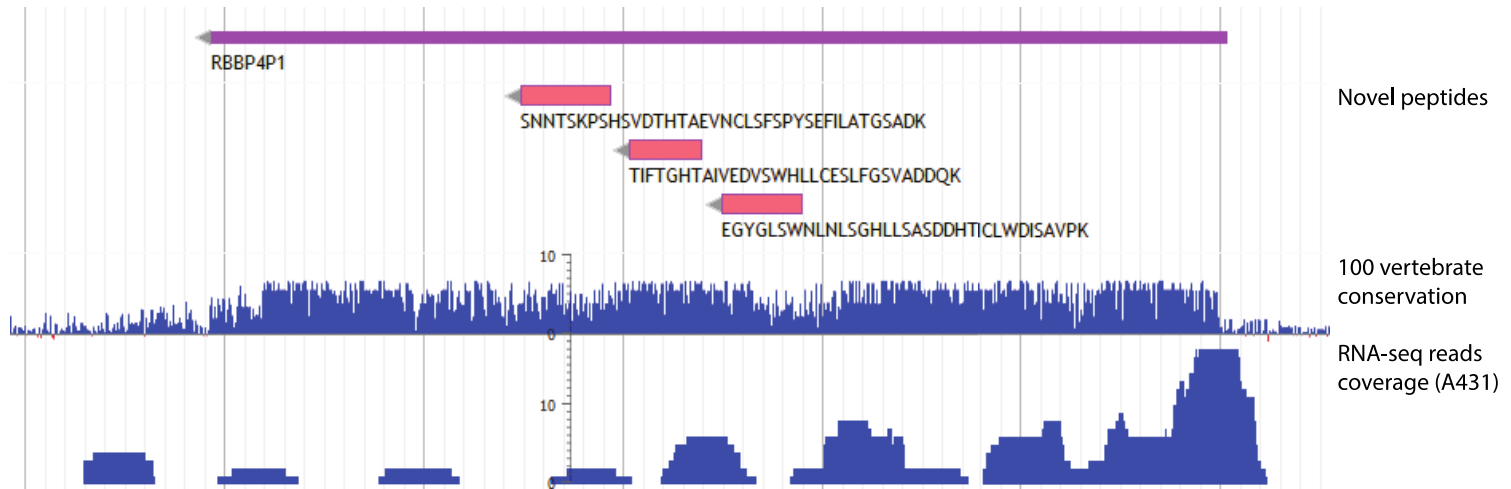

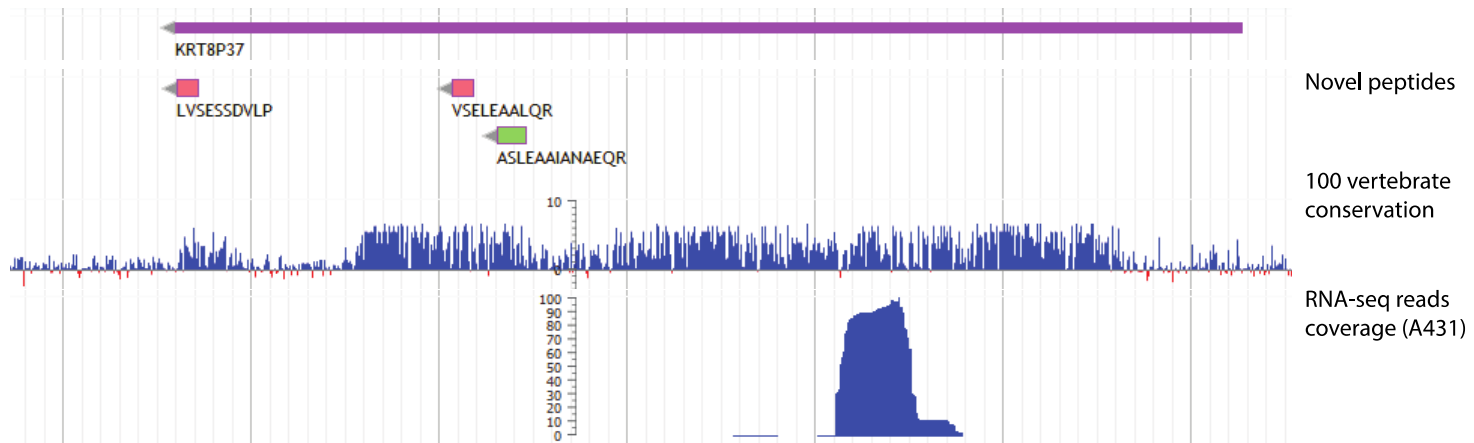

KRT8P45

EYQLMNVK

TTSGYAGGLSSAYGGLTSPSLSYGLGSSFGSGAGSSFSR

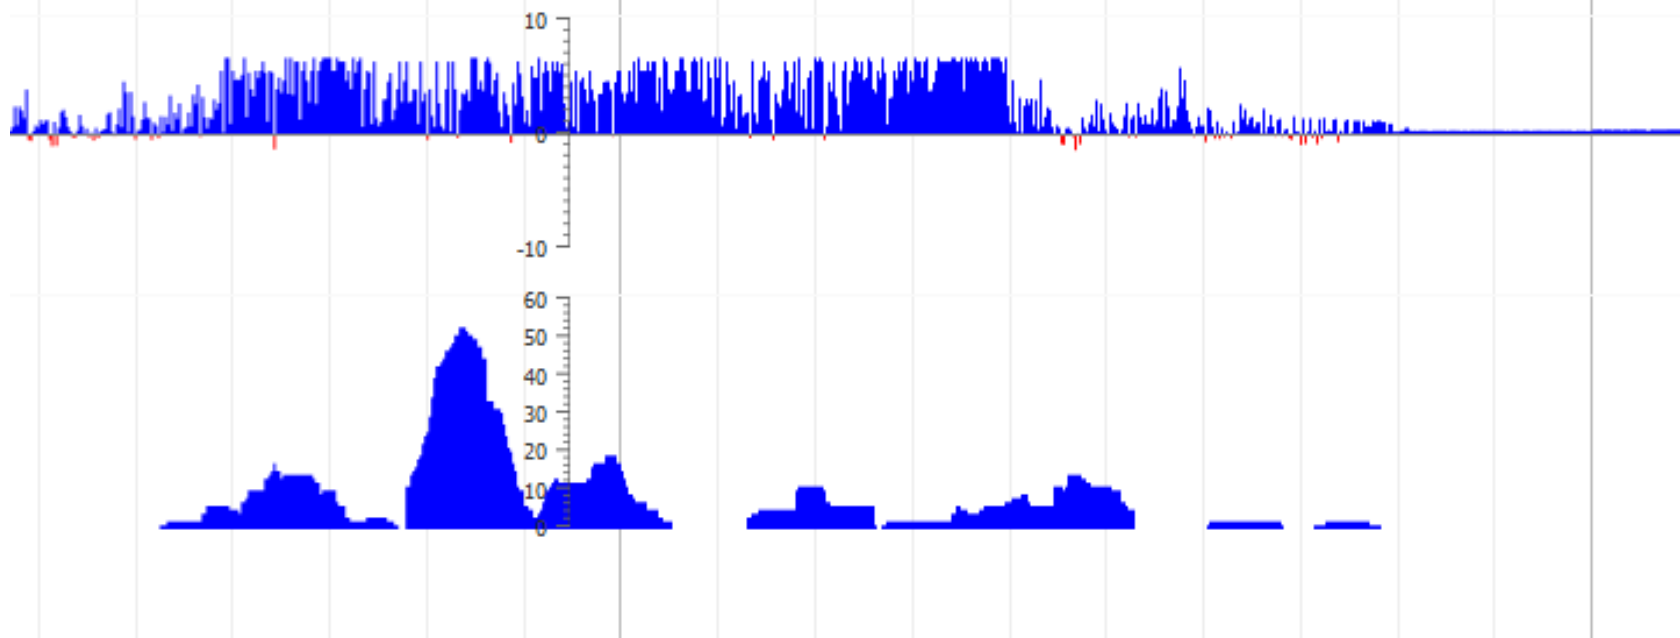

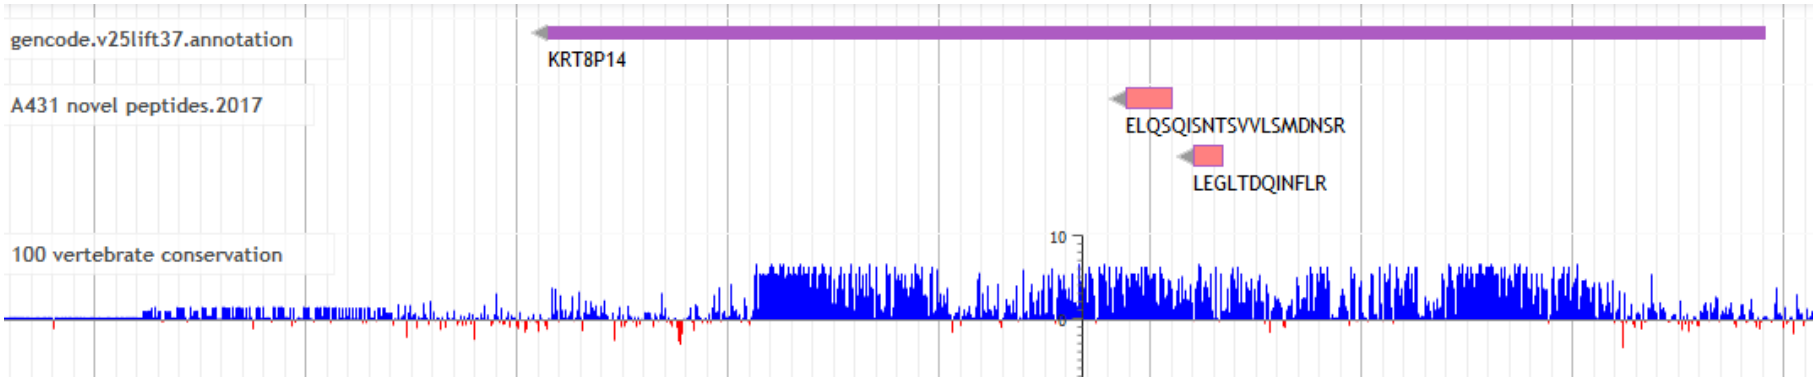



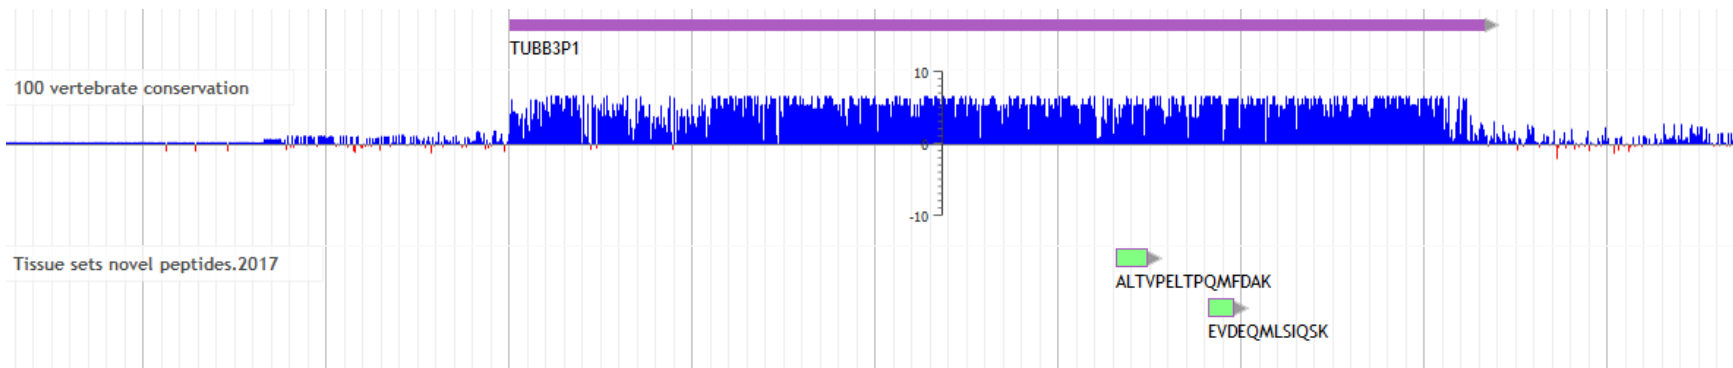

Novel peptides

100 vertebrate conservation

RNA-seq reads coverage (A431)

CAGE (transcription start sites)

Riboprofile (translation start sites)

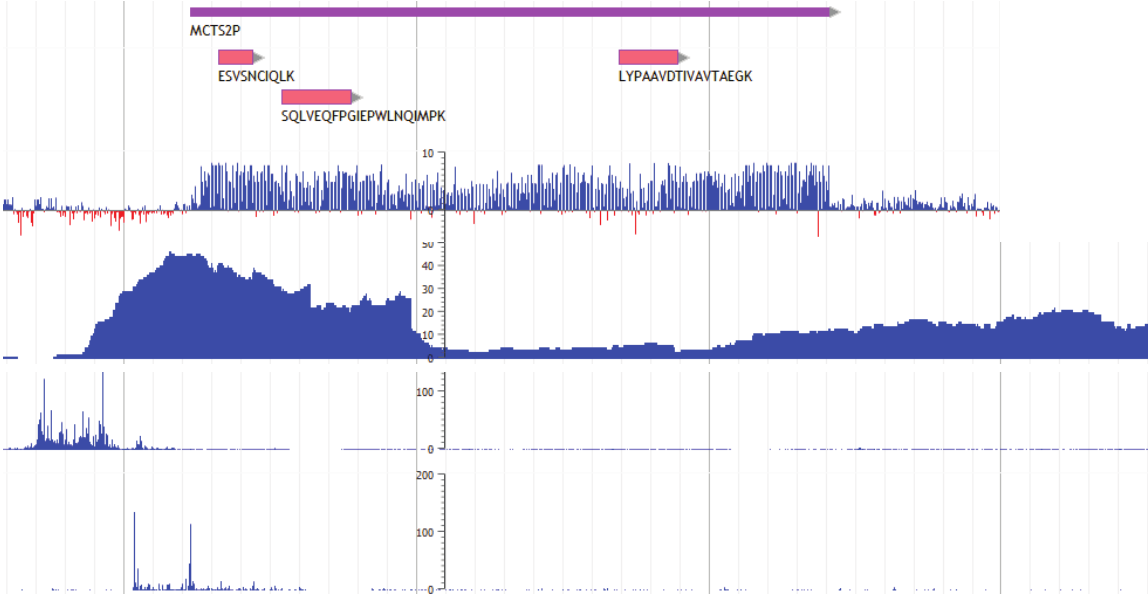

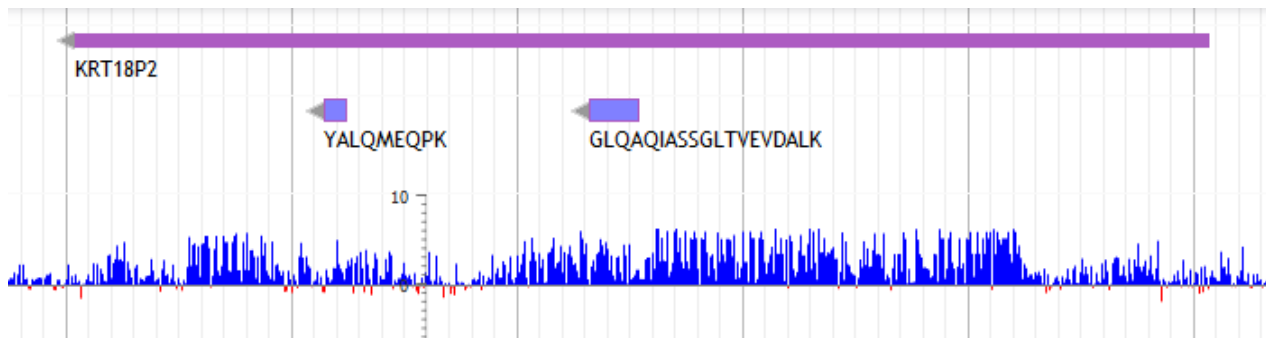

Novel peptides

100 vertebrate conservation

Pseudogene

Novel peptides

100 vertebrate  
conservation

RNA-seq  
reads coverage  
(Testis)

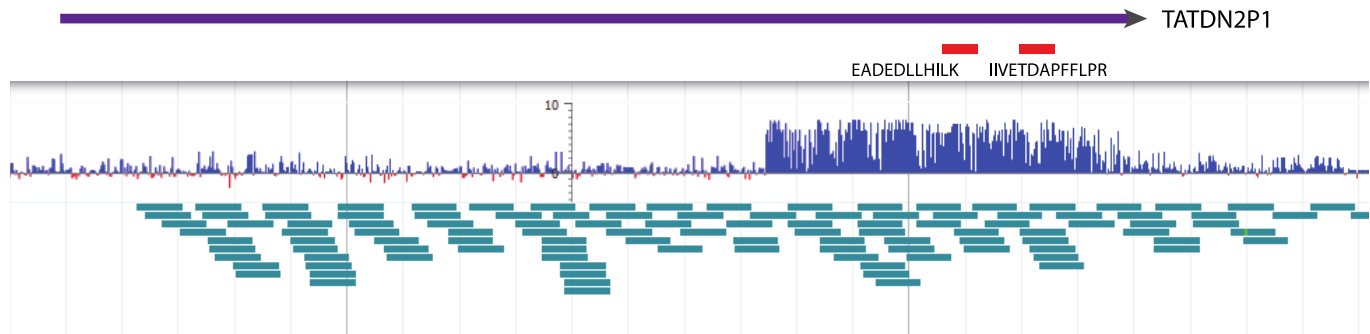

Pseudogene

Novel peptides

100 vertebrate  
conservation

RNA-seq  
reads coverage  
(Testis)

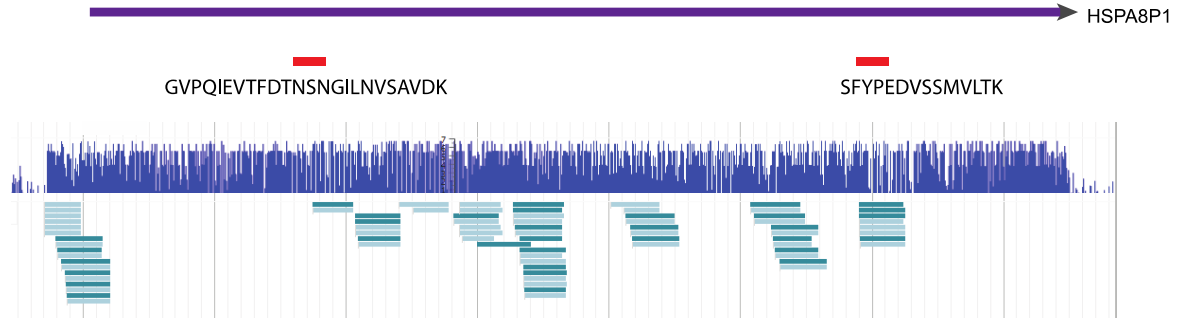

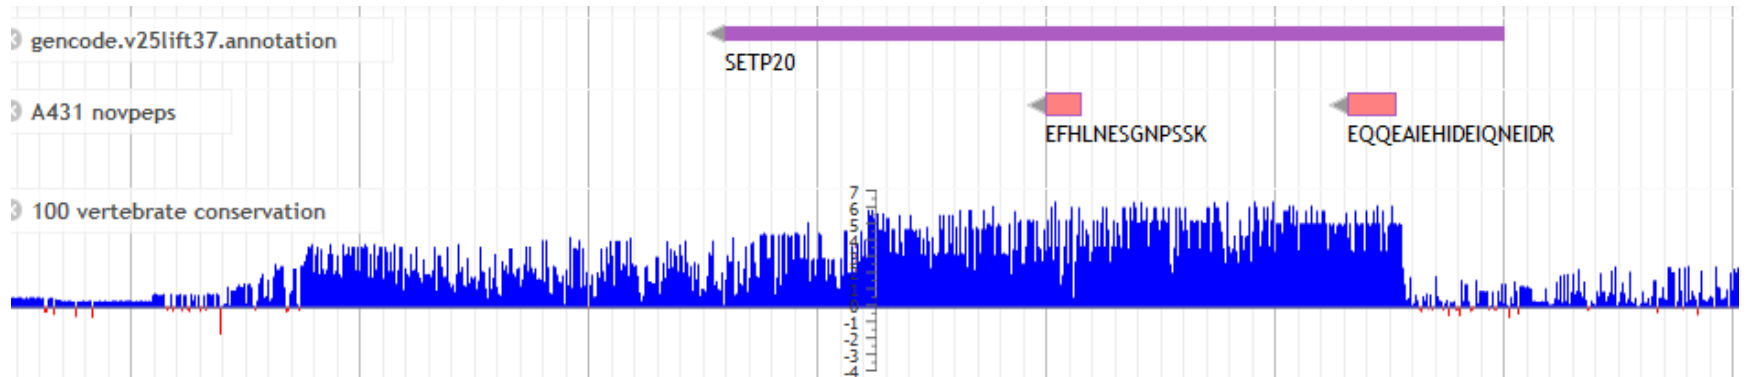

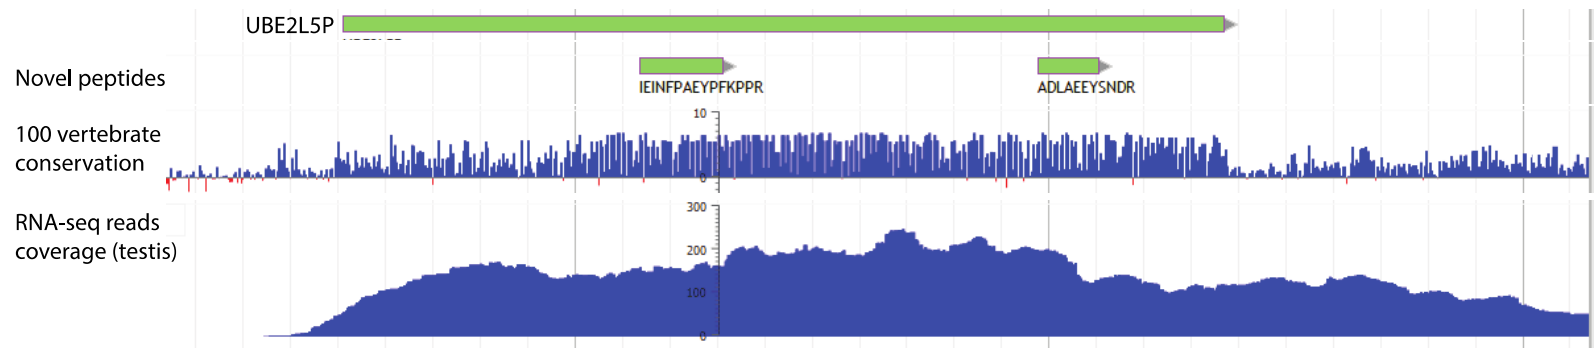

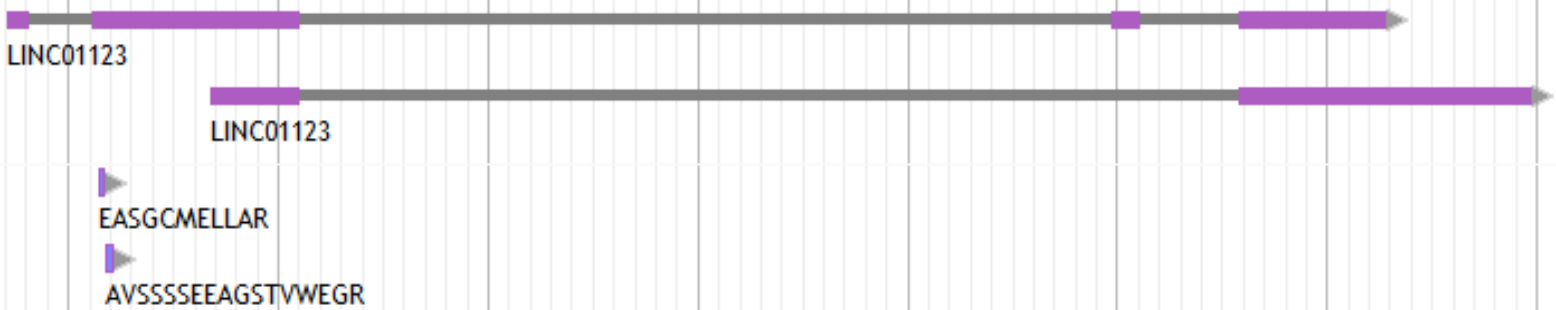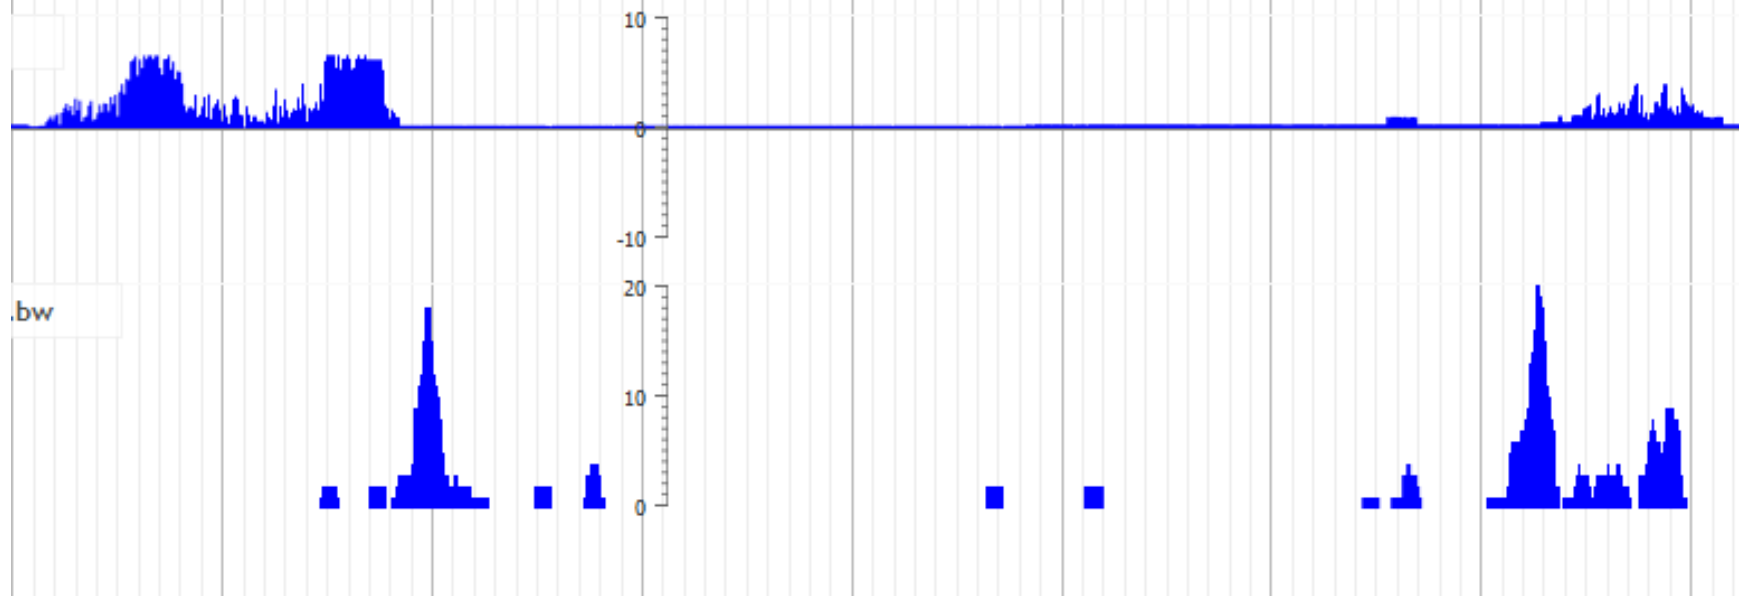



chr19: 53,510,000 ... 53,520,000

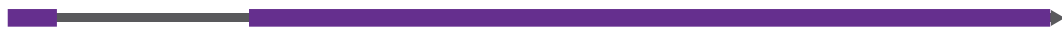

CTD-2620122.3

■ SQVKPVNYNK  
■ LATIDQGPHENPTAFLEK  
■ HTNLDPGSPEGQLVLK  
■ DHFLTQAAPDIR

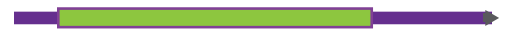

ERVV-1
